# Supplementary material for: Amazing grace: Vancouver's supervised injection facility granted six-month lease on life
Source: PubMed Central journal article supplement (PMC2233622; doi:10.1186/1477-7517-5-3), 2008-01-24
Supplement: 1477-7517-5-3-S2.pdf [file 1477-7517-5-3-S2.pdf]

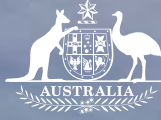

# Return on Investment in Needle and Syringe Programs in Australia

## Report

Return on Investment in Needle and Syringe Programs in Australia • Report

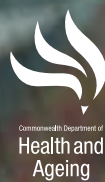

**COMMONWEALTH DEPARTMENT OF  
HEALTH AND AGEING**

RETURN ON INVESTMENT IN NEEDLE &  
SYRINGE PROGRAMS IN AUSTRALIA

REPORT

HEALTH OUTCOMES INTERNATIONAL PTY LTD

IN ASSOCIATION WITH

THE NATIONAL CENTRE FOR HIV EPIDEMIOLOGY AND  
CLINICAL RESEARCH

AND

PROFESSOR MICHAEL DRUMMOND, CENTRE OF HEALTH  
ECONOMICS, YORK UNIVERSITY

---

© Commonwealth of Australia 2002

ISBN 0 642 82116 X

This work is copyright. Apart from any use as permitted under the *Copyright Act 1968*, no part may be reproduced by any process without prior written permission from the Commonwealth available from the Department of Communications, Information Technology and the Arts. Requests and inquiries concerning reproduction and rights should be addressed to the Manager, Copyright Services, Info Access, GPO Box 1920, Canberra ACT 2601.

Publication approval number: 3122

Publications Production Unit (Public Affairs, Parliamentary and Access Branch)  
Commonwealth Department of Health and Ageing

---

|                                                                                                          |           |
|----------------------------------------------------------------------------------------------------------|-----------|
| <b>EXECUTIVE SUMMARY</b> .....                                                                           | <b>1</b>  |
| <b>EFFECTIVENESS OF NSPs FOR PREVENTING TRANSMISSION OF HIV AND HCV INFECTION</b> .....                  | <b>1</b>  |
| <b>FINANCIAL EFFECTS OF NSPs</b> .....                                                                   | <b>2</b>  |
| <b>QUALITY OF LIFE (QoL) EFFECTS OF NSPs</b> .....                                                       | <b>4</b>  |
| <b>CONCLUSION</b> .....                                                                                  | <b>6</b>  |
| <b>1 INTRODUCTION</b> .....                                                                              | <b>7</b>  |
| 1.1 BACKGROUND.....                                                                                      | 7         |
| 1.2 OBJECTIVES.....                                                                                      | 7         |
| 1.3 METHODOLOGY.....                                                                                     | 8         |
| 1.4 ACKNOWLEDGEMENT.....                                                                                 | 8         |
| <b>2 AN OVERVIEW OF NEEDLE AND SYRINGE PROGRAMS (NSPs)</b> .....                                         | <b>9</b>  |
| 2.1 AUSTRALIA'S STRATEGIES ON HIV/AIDS AND HEPATITIS C.....                                              | 9         |
| 2.2 OVERVIEW OF NEEDLE AND SYRINGE PROGRAMS.....                                                         | 9         |
| 2.3 OPERATIONS OF NEEDLE AND SYRINGE PROGRAMS.....                                                       | 10        |
| <b>3 THE IMPACT OF NSPs ON HIV AND HCV</b> .....                                                         | <b>12</b> |
| 3.1 EFFECTIVENESS OF NSPs FOR PREVENTING TRANSMISSION OF HIV AND HCV INFECTION.....                      | 12        |
| 3.2 METHODOLOGY FOR ESTIMATES OF NUMBERS OF PEOPLE LIVING WITH HIV ACQUIRED THROUGH INJECTING DRUGS..... | 25        |
| 3.3 METHODOLOGY FOR ESTIMATES OF NUMBERS OF PEOPLE LIVING WITH HCV ACQUIRED THROUGH INJECTING DRUGS..... | 27        |
| 3.4 NUMBER OF HIV INFECTIONS PREVENTED THROUGH THE INTRODUCTION OF NSPs.....                             | 29        |
| 3.5 NUMBER OF HCV INFECTIONS PREVENTED THROUGH THE INTRODUCTION OF NSPs.....                             | 30        |
| <b>4 FINANCIAL EFFECTS OF NSPs</b> .....                                                                 | <b>31</b> |
| 4.1 DESCRIPTION OF THE ECONOMIC MODEL.....                                                               | 31        |
| 4.2 EXPENDITURE ON NSPs.....                                                                             | 32        |
| 4.3 IMPACTS OF NSPs ON HIV AND HCV.....                                                                  | 33        |
| 4.4 METHODOLOGY FOR HEALTH CARE COSTINGS FOR HIV.....                                                    | 36        |
| 4.5 METHODOLOGY FOR HEALTH CARE COSTINGS FOR HCV INFECTION.....                                          | 38        |
| 4.6 HIV TREATMENT COSTS.....                                                                             | 39        |
| 4.7 RETURN ON INVESTMENT.....                                                                            | 42        |
| 4.8 SENSITIVITY ANALYSIS.....                                                                            | 44        |
| 4.9 DISCUSSION.....                                                                                      | 45        |
| <b>5 QUALITY OF LIFE (QoL) EFFECTS OF NSPs</b> .....                                                     | <b>47</b> |
| 5.1 INTRODUCTION.....                                                                                    | 47        |
| 5.2 QUALITY-ADJUSTED LIFE-YEARS (QALYs).....                                                             | 48        |

---

|            |                                                                                                |     |
|------------|------------------------------------------------------------------------------------------------|-----|
| 5.3        | METHODOLOGY FOR ESTIMATING THE QALYS GAINED FROM THE PREVENTION OF HIV AND HCV INFECTIONS..... | 48  |
| 5.4        | NUMBER OF CASES OF HIV AND HCV AVOIDED .....                                                   | 50  |
| 5.5        | NUMBER OF LIFE YEARS GAINED .....                                                              | 50  |
| 5.6        | QUALITY ADJUSTED LIFE YEARS GAINED .....                                                       | 52  |
| 5.7        | SENSITIVITY ANALYSIS.....                                                                      | 55  |
| 5.8        | DISCUSSION.....                                                                                | 56  |
| APPENDICES |                                                                                                |     |
| APPENDIX A | OVERVIEW OF STATE AND TERRITORY NEEDLE AND SYRINGE PROGRAMS .....                              | 57  |
| APPENDIX B | DISCUSSION OF THE METHODOLOGY USED IN THE ECOLOGICAL STUDY .....                               | 73  |
| APPENDIX C | DETAILED TABLES OF EFFECTS OF NSPs ON HIV AND HCV.....                                         | 75  |
| APPENDIX D | DETAILED TABLES ON FINANCIAL EFFECTS AND NPV OF NSPs .....                                     | 105 |
| APPENDIX E | DETAILED TABLES ON QUALITY OF LIFE EFFECTS OF NSPs .....                                       | 125 |
| APPENDIX F | REFERENCES.....                                                                                | 145 |

---

## EXECUTIVE SUMMARY

In 2000, the Department of Health and Ageing engaged Health Outcomes International Pty Ltd (HOI) in association with the National Centre for HIV Epidemiology and Clinical Research (NCHECR) to undertake a study into the economic effectiveness (or return on investment) of needle and syringe programs (NSPs) in Australia.

The study updates and expands a study previously undertaken by Hurley, Jolley and Kaldor which investigated the effectiveness and cost effectiveness of needle and syringe programs in relation to HIV/AIDS (see 'The effectiveness and cost-effectiveness of needle and syringe exchange programs' in *An Economic Evaluation of Aspects of the Australian HIV/AIDS Strategies*, Technical Appendix 2 to *Valuing the past...investing in the future - Evaluation of the National HIV/AIDS Strategy 1993-94 to 1995-96*).

The study seeks to analyse the effectiveness of needle and syringe programs in preventing transmission of HIV, and hepatitis C (HCV) in Australia from 1991 (that is from when NSPs were well established in all jurisdictions except Tasmania) to the end of 2000. The study then uses these findings to calculate the return on investment from NSPs from 1991 to 2000.

### EFFECTIVENESS OF NSPs FOR PREVENTING TRANSMISSION OF HIV AND HCV INFECTION

In this study, NCHECR repeated the ecological study of change in HIV prevalence in cities with and without NSPs because several countries have introduced NSPs since the previous study (Hurley et al. 1997). The study also used a similar methodology to assess the effectiveness of NSPs for prevention of HCV infection.

The ecological study design was used to compare HIV and HCV infection among injecting drug users in countries with and without NSPs. Data recorded on HIV and HCV infection included both seroprevalence and seroincidence studies. NSPs were defined as programs distributing needles and syringes, either free or with minimal charge, irrespective of whether they operated from a fixed or mobile site, whether return of a used syringe was mandatory, or the range of other HIV and HCV prevention and treatment services provided.

For HIV, there were 778 calendar years of data from 103 cities with HIV seroprevalence measurements from more than one year and information on NSP implementation. Studies were from 67 cities without NSP, 23 cities that implemented NSP between the first and last study, and 13 cities that already had NSP when the studies were carried out.

The analysis found that cities that introduced NSPs had a mean annual 18.6% decrease in HIV seroprevalence, compared with a mean annual 8.1% increase in HIV seroprevalence in cities that had never introduced NSPs (mean difference -24.7% [95% CI: -43.8%, 0.5%],  $p=0.06$ ). An analysis which weighted each city by one over the variance of the fitted regression line estimated the mean difference in annual rates of change in HIV-seroprevalence between cities with and without NSPs to be -32.7% [95% CI: -37.5% to -27.6%]  $p<0.001$ . In cities with an initial HIV prevalence less than 10% and with sero-surveys over a period of at least three years, the mean annual decrease in HIV prevalence was 4.0% in cities that introduced NSPs, compared with a mean annual 28.6% increase in cities without NSPs (mean difference -25.3% [95% CI: -50.8%, 13.3%],  $p=0.2$ ). In these cities, the weighted analysis estimated the mean difference to be -18.4% [95% CI: -32.0% to -2.0%]  $p=0.030$ . Because the unweighted results are qualitatively very similar and, for all cities, the point estimate is smaller than the weighted analysis, estimates of NSP effectiveness were based on the unweighted analysis, representing a more conservative approach.

For HCV, there were 190 calendar years of HCV seroprevalence data from 101 cities. Data were from 41 cities without NSP, 9 cities that implemented NSP between the first and last study, and 51 cities that already had NSP when the studies were carried out.

Median HCV prevalence was 75% (range 24% to 96%) in studies from cities without NSPs and 60% (range 17% to 98%) in cities with NSPs (NPtrend  $p=0.01$ ). Overall the results indicated little change in HCV prevalence before

---

NSPs were introduced, followed by a decline after the introduction of NSPs. If HCV prevalence was 75% or 50% respectively before NSPs were introduced, the results correspond to around a 1.5% or 2% decline in HCV prevalence per annum.

The results of the analysis of the effect of NSPs on HIV and HCV prevalence internationally were then applied to estimates of the Australian injecting drug user population to estimate the number of cases of HIV and HCV avoided as a result of the activities of NSPs over ten years during the 1990s. The estimates are presented below.

## **ESTIMATES OF INJECTING DRUG USERS LIVING WITH HIV/AIDS**

### **- WITH NSP INTRODUCTION**

The number of injecting drug users living with HIV/AIDS is estimated to have peaked in the early 1990s at approximately 470 cases, with a peak in people living with AIDS of less than 100 in the late 1990s. The cumulative number of deaths from HIV/AIDS by 2010 is projected to be approximately 350.

### **- WITHOUT NSP INTRODUCTION**

The number of injecting drug users living with HIV/AIDS is estimated to peak in 2000 at approximately 26,000, with a peak in people living with AIDS of almost 3,000 in 2010. The estimated cumulative number of deaths from HIV/AIDS by 2010 is projected to be approximately 5,000.

### **- PREVENTED THROUGH NSP INTRODUCTION**

By the year 2000, approximately 25,000 HIV infections are estimated to have been prevented among injecting drug users since the introduction of NSPs in 1988, and by 2010 approximately 4,500 deaths are projected to have been prevented.

## **ESTIMATES OF INJECTING DRUG USERS WITH HCV AND HCV-RELATED DEATHS**

### **- WITH NSP INTRODUCTION**

In 2000, the number of injecting drug users living with HCV was estimated to be approximately 200,000 (approximately 150,000 with chronic HCV infection). By 2010 an estimated 11,800 injecting drug users are projected to be living with cirrhosis, and estimated cumulative HCV-related deaths are projected to be 1,800.

### **- WITHOUT NSP INTRODUCTION**

In 2000, the number of injecting drug users living with HCV is estimated to be approximately 220,000 (approximately 165,000 with chronic HCV infection). By 2010 an estimated 12,500 injecting drug users are projected to be living with cirrhosis, and estimated cumulative HCV-related deaths are projected to be 1,900.

### **- PREVENTED THROUGH NSP INTRODUCTION**

By the year 2000, approximately 21,000 HCV infections are estimated to have been prevented among injecting drug users since the introduction of NSPs in 1988, (of which approximately 16,000 would have developed chronic HCV); while by 2010 approximately 650 fewer injecting drug users are projected to be living with cirrhosis and 90 HCV-related deaths would have been prevented.

## **FINANCIAL EFFECTS OF NSPs**

### **EXPENDITURE ON NSPs**

Between 1991 and 2000, an estimated \$141 million (\$150 million in 2000 prices) was expended on NSPs across Australia, comprised of \$122 million (87%) by government, and \$19 million (13%) in consumer expenditure.

---

These data cover expenditure on NSPs operating within the programs managed by State and Territory health authorities. It excludes costs associated with the many retail pharmacies that also sell needles and syringes on a commercial basis, for which reliable data is not available on the number of needles sold or the level of expenditure by consumers.

## **TREATMENT COSTS AVOIDED**

Estimates of the lifetime costs of treatment for HIV and HCV cases avoided are based on past and current treatment regimes by disease stage and applied over the projected lifetime of cases. Standardised costs have been used for each component of health care using year 2000 prices.

### **- HIV**

For HIV, annual treatment costs are estimated to rise progressively to the year 2008 as patients progress to later stages of the disease, at which time they peak at approximately \$269 million. Thereafter, annual costs decline, brought about mainly by the declining number of patients in the second and third stages of HIV. Total HIV treatment costs avoided over the lifetime of cases are estimated at \$7,025 million (undiscounted). These represent the savings that accrue from a combination of the following:

- Approximately 25,000 cases of HIV avoided, who
- live for an average of about 24 years after infection, and who
- incur average treatment costs of nearly \$14,000 each year of their life after diagnosis.

### **- HCV**

For HCV, annual treatment costs rise progressively to the year 2040, at which time they peak at approximately \$18.8 million and decline thereafter. The major factor influencing this cost profile is the number of patients who progress to liver failure who, while relatively small in number, have extremely high costs of treatment. Total HCV treatment costs avoided over the lifetime of cases are estimated at \$783 million (undiscounted).

Overall, total treatment costs avoided over the life of the cases of HIV and HCV avoided by NSPs are approximately \$7,808 million (before discounting). The costs of HIV treatment avoided are approximately ten times those for HCV, which reflects a combination of the number of cases avoided in the first instance (25,000 for HIV compared to 21,000 for HCV), a higher diagnosis rate for HIV than HCV, and higher average annual treatment costs for HIV than for HCV.

## **FINANCIAL RETURN ON INVESTMENT**

The calculation of financial return on investment discounts future cashflows associated with the investment in the NSP program and treatment costs avoided by an agreed discount rate. The discount rate most commonly used in government programs of this nature is 5% per annum. For the purposes of illustration, we have also applied discount rates of 3% and 0%.

### **- HIV IMPACTS**

The results of the analysis of financial return on investment in NSPs to government and in total, having regard to the impacts on HIV alone, are presented in Table 1.



**Table 1 Net Present Value of investment in NSPs for HIV.**

| Discount Rate                      | Net Present Value, 1991<br>(\$million, Year 2000 Prices) |                 |
|------------------------------------|----------------------------------------------------------|-----------------|
|                                    | Govt Expenditure                                         | All Expenditure |
| <b>Lifetime Costs of Treatment</b> |                                                          |                 |
| 5%                                 | \$2,277                                                  | \$2,262         |
| 3%                                 | \$3,415                                                  | \$3,398         |
| 0%                                 | \$6,896                                                  | \$6,876         |

The analysis indicates that there have been significant financial savings accruing to government from the investment in NSPs to date, and that these savings will continue to accrue into the future.

#### **- HIV AND HCV IMPACTS COMBINED**

The financial return on investment in NSPs to government and in total, having regard to the impacts on HIV and HCV combined, are presented in Table 2.

**Table 2 Net Present Value of investment in NSPs for HIV and HCV combined.**

| Discount Rate                      | Net Present Value, 1991<br>(\$million, Year 2000 Prices) |                 |
|------------------------------------|----------------------------------------------------------|-----------------|
|                                    | Govt Expenditure                                         | All Expenditure |
| <b>Lifetime Costs of Treatment</b> |                                                          |                 |
| 5%                                 | \$2,402                                                  | \$2,386         |
| 3%                                 | \$3,653                                                  | \$3,637         |
| 0%                                 | \$7,678                                                  | \$7,658         |

The analysis indicates that the incorporation of HCV into the NPV calculations has further increased the savings accruing to government and in total.

In summary, the study indicates that the financial return on investment will exceed manyfold the original investment in NSPs, and that the original investment had been fully recouped and surpassed by the end of the investment period, before any future savings are taken into account. The investment in NSPs is justified by the effect on HIV alone, with the effect on HCV providing an additional financial benefit, albeit a smaller one than HIV. Sensitivity analysis on the main variables used in the analysis indicates that the results are robust under a range of alternative assumptions and scenarios.

## **QUALITY OF LIFE (QoL) EFFECTS OF NSPs**

Since both HIV and HCV are potentially life-threatening conditions, one of the main benefits from averting infections is the prevention of premature mortality. In addition, significant quality of life benefits may also accrue from the avoidance of HIV and HCV. The most widely used approach for estimating quality of life benefits in economic evaluations is the quality-adjusted life-year (QALY). In this approach, states of health are assigned a health state preference or 'utility' value, on a scale including 1.0 (full health) and 0 (death). The amount of time an individual spends in a given health state is then multiplied by the health state preference value to calculate the quality-adjusted life-years (QALYs) gained. The main advantage of the QALY approach is that it provides one combined measure of the benefits of a program that both extends life and maintains quality of life.

**LIFE YEARS GAINED**

The number of life years gained provides a measure of the additional number of years by those persons who would otherwise have been infected with HIV and HCV, but for the effect of NSPs.

The effect of NSPs in terms of life years gained is much greater for HIV than for HCV. The 25,000 persons avoiding HIV are expected to gain an additional 588,000 life years (about 23 years each) than if they had contracted HIV. In comparison, the 21,000 persons avoiding HCV are expected to gain only about 1,200 life years over their lifetime. The difference in these outcomes is essentially due to the different mortality rates associated with each disease and their rate of progression through the various stages.

**QUALITY ADJUSTED LIFE YEARS GAINED**

The application of an adjustment factor to the number of life years gained to take account of the quality of life effects of these diseases leads to a measure referred to as Quality Adjusted Life Years (QALYs). QALYs gained incorporates both the quantity of life gained, and the quality of life gained by avoiding HIV and HCV.

The 25,000 persons avoiding HIV are expected to gain an additional 715,000 quality adjusted life years than if they had contracted the disease. In comparison, the 21,000 persons avoiding HCV are expected to gain about 120,000 quality adjusted life years over their lifetime. The difference between the two diseases is largely attributable to the greater effect of HIV on the “quantity” of life compared to HCV, rather than the “quality” effect.

Applying the same discount rates used in the financial analysis (viz 5%, 3% and 0%) to QALYs gained results in the figures shown in Table 3

**Table 3 Net Present Value of QALYs gained for HIV and HCV**

| Discount Rate | Net Present Value, 1991 (QALYs) |         |           |
|---------------|---------------------------------|---------|-----------|
|               | HIV                             | HCV     | HIV & HCV |
| 5%            | 138,072                         | 32,207  | 170,279   |
| 3%            | 248,364                         | 50,041  | 298,406   |
| 0%            | 715,245                         | 119,992 | 835,237   |

The analysis of the effects of HIV and HCV on both the quantity of life and the quality of life of persons with these diseases adds a further dimension to the assessment of the effect of NSPs among injecting drug users. The benefits demonstrated for consumers in terms of the number of lives saved, the number of life years gained, and the improved quality of life are additional to the direct financial benefits to governments previously identified.

Our analysis demonstrates that NSPs have contributed significantly to:

- The number of cases of HIV and HCV avoided;
- A reduction in the number of deaths from HIV, and to a lesser extent from HCV;
- An increase in the number of life years among injecting drug users, particularly from the avoidance of HIV; and
- An improvement in the quality of life among injecting drug users who would otherwise have contracted HIV or HCV.

Each of these outcomes should be considered over and above the direct financial benefits achieved from the investment in NSPs. It is clear that if we were to place a monetary value against any of these outcomes, the financial gains already demonstrated would be significantly increased.

---

## CONCLUSION

The study into the effect of NSPs on HIV and HCV, and the consequent return on investment from these programs has reinforced the original findings by Hurley, Jolley and Kaldor. The results demonstrate that NSPs are effective in reducing the incidence of both diseases and that they represent an effective financial investment by government.

From a financial perspective, we have considered only the direct costs of treatment saved by the avoidance of HIV and HCV. Such an approach is inherently conservative, and it is likely that there are further financial benefits derived from the investment in NSPs not included in our findings. As such, the savings we have demonstrated, if anything, understate the total financial benefits to government and members of the community.

When considering the effect of NSPs on the lives of those immediately affected by their operation, namely injecting drug users, the study again demonstrates that NSPs have a positive impact. This has been measured in terms of avoidance of deaths, gains in the duration of life and improvements in the quality of life of injecting drug users. Such benefits are additional to the financial benefits demonstrated.

The study has considered the investment in NSPs during the 1990s, at which time we have assumed that the investment ceased. The consideration of effect has been limited to the future benefits accruing from the cases of HIV and HCV avoided during the investment period. The results demonstrate that, across all measures of effect used in the study, NSPs have yielded a significant public health benefit, and that continued investment is warranted from both a financial and human perspective.

---

# 1 INTRODUCTION

## 1.1 BACKGROUND

In 2000, the Department of Health and Ageing engaged Health Outcomes International Pty Ltd (HOI) in association with the National Centre for HIV Epidemiology and Clinical Research (NCHECR) to undertake a study into the economic effectiveness (or return on investment) of needle and syringe programs (NSPs) in Australia.

The study updates and expands a study previously undertaken by Hurley, Jolley and Kaldor which investigated the effectiveness and cost effectiveness of needle and syringe programs in relation to HIV/AIDS (see 'The effectiveness and cost-effectiveness of needle and syringe exchange programs' in *An Economic Evaluation of Aspects of the Australian HIV/AIDS Strategies*, Technical Appendix 2 to *Valuing the past...investing in the future - Evaluation of the National HIV/AIDS Strategy 1993-94 to 1995-96*).

This report is a joint production of Health Outcomes International Pty Ltd and the National Centre for HIV Epidemiology and Clinical Research (NCHECR) with support from Professor Michael Drummond, Centre of Health Economics, York University, UK.

## 1.2 OBJECTIVES

The study seeks to analyse the effectiveness of needle and syringe programs in preventing transmission of HIV, hepatitis C (HCV) and hepatitis B (HBV) in Australia from 1991 (that is from when NSPs were well established in all jurisdictions except Tasmania) to the most recent possible period. The study then uses these findings to calculate the return on investment from NSPs from 1991 to the present.

Specifically the aims of the study were to:

- Estimate the effectiveness of NSPs in relation to preventing transmission of HIV as well as hepatitis B and C;
- Calculate the return on investment in NSPs from 1991 to the present; and
- Provide contemporary research on the effectiveness and efficiency of the NSPs in order to assist stakeholders and governments to demonstrate the role of NSPs as a core population health activity, and to support further investment in NSPs if necessary.

For several reasons the project examined effectiveness in relation to prevention of HIV and hepatitis C, but not hepatitis B. First, epidemiological data were more readily accessible for HIV and hepatitis C, in particular in the Australian setting. For example, the NSP survey that is conducted each year tests injecting drug users for HIV and hepatitis C, but as yet does not include hepatitis B testing. Second, the vast majority (possibly greater than 95%) of injecting drug users exposed to hepatitis B do not develop chronic infection, and are therefore not at risk of major hepatitis B-related morbidity and mortality. Third, there is greater uncertainty in relation to the natural history of chronic hepatitis B.

The introduction of NSPs may have reduced incidence of hepatitis B among injecting drug users in Australia, particularly as uptake of hepatitis B vaccination is not optimal. However, it is felt that the cost savings through hepatitis B prevention would have been considerably lower than for either HIV or hepatitis C. The exclusion of hepatitis B from the analysis therefore represents a conservative approach, and may underestimate, to some extent, the total costs of treatment avoided.

---

## 1.3 METHODOLOGY

The study comprised two discrete stages. The first related to the development of an agreed methodology that examined the evidence base available to support the study, and from that evidence, to develop an approach that maximised the use of available data. This stage comprised three components:

- An international literature review that examined national and international research of relevance to the study. The review identified a body of evidence that could inform the project, promote development in specific areas and encourage debate among stakeholders on issues of interest. The literature review did not seek to examine the findings of the literature, but rather to simply identify whether or not there is a sufficient body of evidence available to support a study of this type. Particular topics of interest explored included: evaluations (economic and other) of NSPs internationally; studies into the incidence and prevalence of HIV, HBV and HCV; and quality of life studies for patients with chronic illnesses (particularly HIV and HCV).
- Consultations with Commonwealth, State and Territory representatives were undertaken to develop a profile of NSPs across Australia, and to determine the range, nature and duration of operational data (activity and costs) within each jurisdiction to be used in the study.
- Following the above, a methodology for the study was developed and provided to the study Advisory Committee for consideration and comment.

The second stage of the study was the implementation of the approved methodology, the outcomes of which are presented in this report. The key components of the methodology were:

- An ecological study of the effect of NSPs on HIV and HCV, based on the international literature together with a range of related information and data from within Australia.
- Collection of data on the costs of operating NSPs in all Australian jurisdictions.
- Collection of data on the lifetime costs of treatment of HIV and HCV in the current clinical environment.
- Determination of Quality of Life (QoL) values for persons with HIV and HCV.
- Development and application of an economic model to evaluate the return on investment in NSPs.
- Determination of the quality of life impacts of NSPs on HIV and HCV.
- Preparation of draft and final reports presenting our findings.

In applying the findings of the impact of NSPs on HIV and HCV in Australia, we have assumed that NSPs have had no effect on the size of the injecting drug user population (i.e. that NSPs do not increase drug use). Whilst acknowledging the debate that exists on this subject, the available evidence from Australia and overseas has not demonstrated that NSPs have resulted in an increase in drug use, and hence our assumption is reasonable (See Gyuish et al (1993), Watters et al (1994), Wolk et al (1990) and Schoenbaum et al (1996)).

## 1.4 ACKNOWLEDGEMENT

Throughout the course of the study, a number of individuals and organisations across Australia have contributed information, data, advice and other forms of assistance to the researchers. Their contribution is gratefully acknowledged.

---

## 2 AN OVERVIEW OF NEEDLE AND SYRINGE PROGRAMS (NSPs)

The information presented in this section has been largely derived from the paper “Needle and Syringe Programs: a review of the evidence” published by the Australian National Council on AIDS, Hepatitis C and Related Diseases (ANCAHRD).

### 2.1 AUSTRALIA’S STRATEGIES ON HIV/AIDS AND HEPATITIS C.

The first National HIV/AIDS Strategy was launched in 1989. According to Professor Richard Feachem, from the World Bank, who oversaw the evaluation of the second National HIV/AIDS Strategy:

*“The first National HIV/AIDS Strategy released by the Commonwealth Government in 1989 provided a framework for an integrated response to the HIV epidemic and a plan for action across a range of policy and program activities. Needle and Syringe Programs were a key component on the education and prevention strategy.”<sup>1</sup>*

Professor Feachem concluded: *‘Needle and Syringe Exchange Programs must be a foundation of Australia’s prevention efforts in a third Strategy and beyond’*. The third National HIV/AIDS Strategy (Partnerships in Practice: National HIV/AIDS Strategy 1996-97 to 1998-99) continued to support Needle and Syringe Programs as an important part of its prevention program for people who inject drugs.

The fourth National HIV/AIDS Strategy and the first National Hepatitis C Strategy, continue to support Needle and Syringe Programs as effective harm reduction interventions.

### 2.2 OVERVIEW OF NEEDLE AND SYRINGE PROGRAMS

Needle and Syringe Programs are a public health measure to reduce the spread of blood borne viral infections such as HIV and hepatitis C among injecting drug users. These Programs are supported by the National Drug Strategy’s harm reduction framework. They provide a range of services that include provision of injecting equipment, education and information on reduction of drug-related harms, referral to drug treatment, medical care and legal and social services. Equipment provided includes needles and syringes, swabs, vials of sterile water and ‘sharps bins’ for the safe disposal of used injection equipment. The aim of providing sterile injecting equipment is to prevent the shared use of injecting equipment, which can lead to the transmission of blood borne viral infections. Staff also address the potential for transmission of infection via sexual contact by providing condoms and safer sex education. By engaging injecting drug users in health services, those who continue to use drugs are likely to incur less harm to themselves and society. They are also an important point for collection of used injecting equipment.

The first Australian Needle and Syringe Program began in Sydney in 1986 as a trial project. The testing of syringes returned to this Darlinghurst Program detected an increase in HIV prevalence, suggesting that HIV was spreading among clients. In the following year Needle and Syringe Programs became NSW Government policy. Other States and Territories followed soon after.

There are a number of different models of Needle and Syringe Programs operating in Australia that vary between different jurisdictions and sometimes by locality. Depending on the jurisdiction, the proportions of these that are government run and non-government run also vary. Furthermore, of the NSPs operating in the non-government sector, a number of these are ‘peer-based’ NSPs. Peer-based NSPs can be distinguished by the employment of past or current drug users in the development and provision of NSP services to networks of injecting drug users.

---

<sup>1</sup> Feachem, RGA. 1995. Valuing the past... Investing in the future. Evaluation of the National HIV/AIDS Strategy 1993-94 to 1995-96. AGPS, Canberra.

---

It is widely understood that peer-based services have had a significant and positive impact on the delivery and acceptability of NSPs to injecting drug users.

Broadly the following NSP service models exist throughout Australia:

*Primary outlets* are stand-alone agencies that are specifically established to provide injecting equipment, sometimes along with primary medical care. Staff provide these specific services in a non-judgmental manner and develop a rapport with individuals who are otherwise hard to reach.

*Secondary outlets* offer needle distribution or exchange as one of a range of other health or community services. Typical secondary outlets include hospital Accident and Emergency Departments and Community Health Centres.

*Mobile services* are distribution and exchange services provided by vehicle or on foot.

*Outreach services* have workers who move around from place to place to extend the reach of the service, often out of hours.

*Vending machines* dispense needle and syringe packs containing several 1ml syringes for a small fee. These machines are monitored and restocked by Needle and Syringe Program staff.

Needle and Syringe Programs tend to be located in relatively public places because they need to be accessible. Various government-sponsored pharmacy schemes operate throughout Australia. Generally the schemes provide 1ml syringes, which can either be purchased, or, in NSW, exchanged free on return of a pack with used syringes. In addition to those participating in the government-sponsored schemes, other pharmacies sell needles and syringes and other equipment used for injecting on a commercial basis.

Over 40 countries operate Needle and Syringe Programs including: Australia, Belgium, Brazil, Bulgaria, Canada, China, Croatia, Czech Republic, Denmark, Estonia, Finland, Germany, Greece, Hungary, India, Kazakhstan, Latvia, Luxembourg, Nepal, Netherlands, Norway, Philippines, Poland, Portugal, Slovak Republic, Salvador, Slovenia, Thailand, Ukraine, United Kingdom and the United States of America.

## **2.3 OPERATIONS OF NEEDLE AND SYRINGE PROGRAMS**

While Needle and Syringe Programs operate in all Australian States and Territories, their type, level of activity and funding arrangements differ considerably between jurisdictions. As part of the current study, a profile on NSPs in each State and Territory was developed, in association with representatives from the respective State and Territory health authorities. These profiles are presented in Appendix A.

In addition, State and Territory health authorities were asked to provide details of the level of government expenditure and consumer fees paid for NSP services in recent years, together with estimates of the number of needles and syringes distributed. A summary of the data reported is presented in Table 2.1. It should be noted that in several instances, estimates have been imputed based on data provided by health authorities and the analysis of trends within each State/Territory.

The information presented in the table excludes expenditure on, and needles and syringes distributed through pharmacies that sell these products on a commercial basis and are separate from government-auspiced NSPs. Reliable data on these services are not available across all jurisdictions, and consequently they have been excluded from the analysis presented in this report. However, in order to test the possible effect of their inclusion in the financial analysis, sensitivity analysis presented in Section 4.8 considers the impact of higher levels of costs of operating NSPs without any increase in benefit.

**Table 2.1 Expenditure and needles distributed by NSPs by State/Territory, 1999/2000 <sup>(1)</sup>**

|                          | <b>Government<br/>Expenditure<br/>(\$'000)</b> | <b>Consumer<br/>Expenditure<br/>(\$'000)</b> | <b>Total Expenditure<br/>(\$'000)</b> | <b>Needles Distributed<br/>(000)</b> |
|--------------------------|------------------------------------------------|----------------------------------------------|---------------------------------------|--------------------------------------|
| ACT                      | \$531                                          | \$8                                          | \$539                                 | 593                                  |
| NSW                      | \$9,827                                        | \$463                                        | \$10,290                              | 11,566                               |
| NT                       | n.a.                                           | -                                            | n.a.                                  | 604 <sup>2</sup>                     |
| Qld                      | \$1,678                                        | -                                            | \$1,678                               | 5,300                                |
| SA                       | \$787                                          | \$43                                         | \$830                                 | 3,018                                |
| Tas                      | \$484                                          | \$138 <sup>2</sup>                           | \$622                                 | 1,381 <sup>2</sup>                   |
| Vic                      | \$4,767                                        | -                                            | \$4,767                               | 6,177                                |
| WA                       | \$1,227                                        | \$2,349 <sup>2</sup>                         | \$3,576                               | 3,209                                |
| <b>Total<sup>1</sup></b> | <b>\$19,673</b>                                | <b>\$3,001</b>                               | <b>\$22,674</b>                       | <b>31,848</b>                        |

<sup>1</sup> Data relates to government-auspiced NSPs only. Excludes expenditure on needle and syringes sold through pharmacies on a commercial basis.

<sup>2</sup> Includes figures imputed from data provided by State/Territory health authorities.



---

## **3 THE IMPACT OF NSPs ON HIV AND HCV**

### **3.1 EFFECTIVENESS OF NSPs FOR PREVENTING TRANSMISSION OF HIV AND HCV INFECTION**

#### **3.1.1 INTRODUCTION**

Measures to prevent HIV infection among people who inject drugs generally focus on preventing blood contact during injection by reducing injection, promoting use of sterile equipment when injecting, or adopting safer injecting practices. Consequently, Needle and Syringe Programs (NSPs) are a key strategy for preventing transmission of HIV infection in several countries, including Australia. In other countries, implementation has been limited by uncertainty about their effectiveness.

Randomised trials of the effectiveness of NSP in preventing HIV transmission have not been conducted. Several observational studies have assessed the impact of NSPs on self-reported risk behaviours, in particular use of sterile syringes or re-use of one's own syringe (Drucker et al. 1998). A few studies have compared HIV incidence or HIV, HBV or HCV prevalence in participants and non-participants of NSPs (Bruneau et al. 1997; Des Jarlais et al. 1995; Hagan et al. 1999; van Ameijden et al. 1994). One study compared NSP implementation in countries with sustained low HIV prevalence to those with high HIV prevalence (Hurley et al. 1997). While another used an ecological study design to compare changes in HIV prevalence in cities with and without NSPs (Hurley et al. 1997). The data generally, but not always, show NSPs to be effective in preventing HIV transmission.

In contrast to HIV infection, prevalence of HCV infection among injecting drug users is universally high, regardless of whether the studies were done in cities with or without NSPs (MacDonald et al. 1996). It is likely that HCV prevalence was already very high among injecting drug users before NSPs were introduced. However, there are no studies that quantify the impact of NSPs on HCV infection. In this study, we have repeated the ecological study of change in HIV prevalence in cities with and without NSP because several countries have introduced NSP since the previous study (Hurley et al. 1997). We have also used a similar methodology to assess the effectiveness of NSP for prevention of HCV infection. A discussion on the rationale behind the approach adopted in this study is presented in Appendix B.

#### **3.1.2 METHODS**

The ecological study design was used to compare HIV and HCV infection among injecting drug users in countries with and without NSPs. Data recorded on HIV and HCV infection included both seroprevalence and seroincidence studies. NSPs were defined as programs distributing needles and syringes, either free or with minimal charge, irrespective of whether they operated from a fixed or mobile site, whether return of a used syringe was mandatory, or the range of other HIV and HCV prevention and treatment services provided.

Several sources were used to identify published reports of HIV and HCV prevalence and incidence among injecting drug users and implementation of NSPs. Three electronic databases that indexed relevant journals were searched from January 1984 to June 2001. Both Medline and Embase databases were used because each placed an emphasis on research from different continents, that is, North America and Europe respectively. The Current Contents database was also used because it included literature from Social Science and Psychology journals. Additional studies were obtained from country specific surveillance reports, the HIV/AIDS Surveillance Database (US Census Bureau & UNAIDS, 2000), relevant websites, and through review of the index of journals frequently cited in the electronic searches.

All studies with sample size of at least 50 were included. Cities with HIV prevalence studies were only included if HIV was measured among injecting drug users in two or more calendar years. Studies of HIV or HCV among incarcerated injecting drug users were excluded because very few countries provide NSP during imprisonment.

---

Studies reported in journals published in languages other than English were only included if sufficient information was provided in the abstract to determine whether the study was suitable for inclusion and all required data points were reported in the abstract. References used in the analysis are provided in Appendix F.

Number of injectors tested per calendar year, percentage with HIV and /or HCV, presence or absence of NSP, and recruitment site were recorded for all studies. If studies reported data aggregated for more than one calendar year, the mid-point of the study period was used as the survey date. Data were also recorded on HIV and HCV prevalence among new and young injectors where available. Studies of HCV incidence were included if they reported numbers of incident HCV infections and person-years of follow-up.

Analysis compared change in HIV and HCV prevalence between cities with and without NSPs at the time of the surveys. For HIV prevalence, city-specific change in prevalence was used in the analysis. For HCV prevalence, however, it was not possible to use city-specific change because relatively few cities had more than one estimate of prevalence.

For each city, the annual rate of change of HIV seroprevalence was estimated by fitting a regression line on a logit scale, with calendar years centred to 1990. The annual rate of change of HIV seroprevalence was also estimated using regressions weighting the comparison of cities with and without NSPs according to one over the variance of the regression estimator (Hurley et al. 1997). The effect of NSPs was assessed by comparing the annual rate of change in HIV seroprevalence in cities that had ever introduced NSPs with cities that had never introduced NSPs. Analyses of HIV seroprevalence were performed comparing all cities, and also in the subset of cities which had an initial HIV seroprevalence of less than 10%, and had results from at least three surveys available over at least three years. Analyses were repeated using regressions weighted according to survey sample size, and also excluding cities in developing countries.

A random effects regression model was used for analyses of HCV seroprevalence because few cities had data points before and after NSPs were introduced, and to allow appropriately for within and between city effects. The analysis model fits regression equations of the form:

$$\text{Logit(HCV prevalence)} = \zeta + \eta^*(\text{calendar year}) + v^*(\text{year since NSPs started})$$

The parameter estimate for  $v$  can then be directly interpreted as the modifying effect of NSPs on logit(HCV prevalence) levels per year. The effect of NSPs on HCV prevalence was estimated using all data from all cities, excluding studies that used blood stored since 1981, and for cities that introduced NSP between the first and last available study. A random effects regression model was also used to estimate the effect of NSPs on HCV prevalence using data available for people reporting less than three years of drug injection. Other regression models, such as ML random effects, and GEE, were also used on the sampled HCV prevalences and gave identical results (data not reported).

Two sets of analyses were performed to assess the effect of NSPs on HCV incidence. In the first set of analyses, random effects and GEE negative-binomial models were used to compare cohorts in cities with and without NSPs, allowing for within and between city effects in the analysis and for over-dispersion effects. In the second analysis, an overall incidence rate was calculated for each city by summing the numbers of incident infections and person-years of follow-up. Straightforward negative-binomial regression models were then used to compare cities with and without NSPs.

### **3.1.3 HIV SEROPREVALENCE**

There were 778 calendar years of data from 103 cities with HIV seroprevalence measurements from more than one year and information on NSP implementation. Studies were from 67 cities without NSP, 23 cities that implemented NSP between the first and last study, and 13 cities that already had NSP when the studies were carried out (Table 3.1.1).

---

HIV prevalence ranged from zero to 79% at the first data point for each city (median 18%), with 53 cities reporting first HIV prevalence 10% or less. Data were reported from 1978 to 1999. Studies with first HIV prevalence 10% or less were available from 23 cities without NSP, 19 cities that implemented NSP between the first and last study, and 13 cities that already had NSP when the studies were carried out

The fitted HIV prevalence regression lines are presented for those cities that had never introduced NSPs in Figure 3.1a, and for those cities that had ever introduced NSPs in Figure 3.1b. To illustrate the fitting procedure, the fitted regression lines and the reported HIV seroprevalence survey results are shown for two sites (Songkla Province, Thailand and Sydney, Australia) in Figures 3.1c and 3.1d respectively.

The overall comparison of annual rates of change of HIV seroprevalence in cities that never introduced NSPs with cities that did introduce NSPs are summarised in Table 3.1.2. Cities that introduced NSPs had a mean annual 18.6% decrease in HIV seroprevalence, compared with a mean annual 8.1% increase in HIV seroprevalence in cities that had never introduced NSPs (mean difference -24.7% [95% CI: -43.8%, 0.5%],  $p=0.06$ ).

In cities with an initial HIV prevalence less than 10% and with sero-surveys over a period of at least three years, the mean annual decrease in HIV prevalence was 4.0% in cities that introduced NSPs, compared with a mean annual 28.6% increase in cities without NSPs (mean difference -25.3% [95% CI: -50.8%, 13.3%],  $p=0.2$ ).

Variability of the point estimate was markedly reduced and statistical significance markedly increased when the analyses for all cities and cities with HIV prevalence less than 10% were weighted according to one over the regression estimate (The better fit implies a smaller variance, and therefore its reciprocal is larger, representing a larger weight). However, a disadvantage of the weighted analyses is that it tends to put much greater weight on the few cities in which the linear regression gives a very good fit to the available HIV seroprevalence estimates. For this reason, and because the unweighted results are qualitatively very similar and, for all cities, the point estimate is smaller than the weighted analysis, estimates of NSP effectiveness were based on the unweighted analysis.

### **3.1.4 HCV SEROPREVALENCE**

There were 190 calendar years of HCV seroprevalence data from 101 cities. Data were from 41 cities without NSP, 9 cities that implemented NSP between the first and last study, and 51 cities that already had NSP when the studies were carried out (Table 3.1.3). There were 71 cities with data available for one calendar year, 13 cities with data for two calendar years and 17 cities with data for three or more calendar years. In the 30 cities with HCV seroprevalence data available for more than one year, 60% had already implemented NSPs before the first year of measurement and 30% introduced NSP between the first and last year of measurement.

Median HCV prevalence was 75% (range 24% to 96%) in studies from cities without NSP and 60% (range 17% to 98%) in cities with NSP (NP trend  $p=0.01$ ). Data were reported from 1973 to 2000 (Figure 3.2). HCV results from stored samples collected between 1973 and 1989 were reported by 21 cities. There were 44 cities with their first study carried out between 1990 and 1994 and 36 cities with their first study between 1995 and 1999.

Overall the results indicated little change in HCV prevalence before NSPs were introduced, followed by a decline after introduction of NSPs (Table 3.1.4). If HCV prevalence was 75% or 50% respectively before NSPs were introduced, the results correspond to around a 1.5% or 2% decline in HCV prevalence per annum.

Similar results were obtained when two studies based on samples from the 1970s and one from 1980 were excluded from analysis and when analysis was limited to nine cities that implemented NSP between the first and last study (Table 3.1.4). Other analyses, using different regression models, such as ML random effects, and GEE, gave similar results (data not presented).

---

### 3.1.5 HCV SEROPREVALENCE AMONG NEW INJECTORS

There were 48 studies, from 19 cities, with HCV seroprevalence estimated among people reporting less than three years of injecting drug use (Figure 3.3). Most studies were from nine Australian cities (n=35, 73%). There were also two studies from both Baltimore and New York, and one study each from Chicago, Dublin, Lille, Liverpool, Manipur, Padua, New Zealand (four cities combined), and Valencia.

Most studies were carried out in cities with NSPs (43 studies from 16 cities). Five studies were carried out in four cities without NSPs. Before and after NSP data were only available from one city. Studies were carried out between 1985 and 2000, with half since 1996 (Figure 3.3). Sample size ranged from 14 to 303, median 53.

Median HCV prevalence was substantially lower in cities with than without NSPs (19% vs 71%; Table 3.1.5). On average, HCV prevalence in cities with NSPs was 37% lower than in cities without NSPs using random effects regression modelling (mean (sd): 25% (+18%) vs. 66% (+15%),  $p < 0.001$ ; Table 3.1.6).

### 3.1.6 HCV INCIDENCE

HCV incidence was reported for 27 time periods from nine countries. All three studies in cities without NSP were from Italy (Naples, Padua and Rome) in early 1990. HCV incidence studies in cities with NSPs were from six Australian cities (nine data points), Amsterdam (four data points), Baltimore (three data points), Berlin (one data point), Czechoslovakia (one data point), Geneva (two data points), Malmo (one data point), New Zealand (one data point), and Seattle (one data point).

On average, HCV incidence was 25 per 100 person years in studies from cities without NSPs compared with 16 per 100 person years in studies from cities with NSPs (Table 3.1.7). Similar rates were obtained when HCV incidence was aggregated for each city (Table 3.1.9). Analyses consistently indicated a non-statistically significant protective effect for HCV incidence in cities with NSPs using random effects and GEE negative-binomial regression models for all data points and straightforward negative-binomial regression modelling for data aggregated by city (Table 3.1.8).

### 3.1.7 DISCUSSION

On average, HIV seroprevalence decreased in studies of injecting drug users in cities with NSPs whereas in studies from cities without NSPs, HIV seroprevalence increased. Seroprevalence of HCV also decreased annually in studies carried out after NSPs were introduced. HCV prevalence was substantially lower among people reporting less than three years of drug injection in cities with NSPs compared to cities without NSPs. There was also a non-statistically significant protective effect for HCV incidence in cities with NSPs when compared to those without NSPs.

There are several limitations associated with the ecological study design that should be considered when interpreting the findings from these studies. Seroprevalence data used in the analyses were collected according to different protocols and in diverse populations. It is unlikely that estimates of HIV and HCV seroprevalence in cities with NSPs would differ systematically from those in cities without NSPs, so any such sampling bias would underestimate the effectiveness of NSPs. Because cities were selected for analysis by the existence of published HIV and HCV serological surveys, bias may have been introduced by the decision to do a survey in a particular city at a particular time.

Data on NSPs used in the analyses were based on presence or absence of NSPs rather than on the extent and uptake of these services. Given the positive findings, however, it is likely that inclusion of these parameters would result in a dose response effect on HIV and HCV seroprevalence from NSPs. In addition, it is not possible to separate the effects of implementation of NSPs from the other HIV prevention strategies (Benedikt et al. 2000). In most settings, introduction of NSPs is one component of a broader harm reduction package to reduce the risk of transmission of blood-borne viruses and other harm associated with injecting drug use. Other components include education and counselling, drug dependency treatment strategies such as methadone maintenance

therapy, and provision of clean injecting equipment through other outlets in particular pharmacies. Adequate data was not available on individual components of harm reduction strategies to allow an evaluation of the impact of components other than provision of clean injecting equipment (NSPs). Sensitivity analysis has been conducted to determine the outcome of lower rates of NSP effect on HIV (See Section 4.8).

The excess risk of HIV in people who inject drugs is not due solely to sharing needles, other injecting practices and sexual behaviour patterns increase HIV risk. In contrast to HIV, HCV infection is rarely spread through sexual transmission (MacDonald et al. 1996).

It is also possible that HIV seroprevalence may have remained low in some of the cities with NSPs, irrespective of their introduction. HCV infection, however, is universally high among drug injectors. In most countries HCV infection became endemic among this population before there was widespread publicity about transmission of blood borne viruses through injecting practices. Because HCV infection remains asymptomatic for longer than HIV infection, it is also possible that people with HCV infection remain in the population of injectors for longer than those with HIV infection, therefore increasing the prevalence of HCV infection in seroprevalence surveys of injectors.

If NSPs decrease the incidence of HIV and HCV, the rate of increase in seroprevalence should decrease, although the seroprevalence itself may not decrease, at least initially. It is likely that the lower effect of NSP on HCV than HIV seroprevalence can be attributed to the generally higher prevalence of HCV compared to HIV before the introduction of NSPs.

NSPs influence HIV and HCV transmission by increasing use of sterile syringes for injection and lowering the rate of syringe sharing thereby reducing contact with each virus. Some NSPs also provide referrals to drug treatment centres, condoms and education about minimising risk. The difference in rate of change of HIV seroprevalence between cities with and without NSPs and the decrease in HCV prevalence in cities after the introduction of NSPs may not be due solely to NSPs. Nonetheless, the study provides evidence that NSPs reduce the spread of HIV and HCV infection.

**Table 3.1.1 Location of cities and sites of recruitment for cities with at least two HIV prevalence studies according to NSP status from the time of first to last study**

| Location of studies |                | No. cities without NSP | No. cities with & without NSP | No. cities with NSP |
|---------------------|----------------|------------------------|-------------------------------|---------------------|
| Asia                | China          | 3                      | 0                             | 0                   |
|                     | India          | 1                      | 1                             | 0                   |
|                     | Malaysia       | 4                      | 0                             | 0                   |
|                     | Myanmar        | 4                      | 0                             | 0                   |
|                     | Nepal          | 0                      | 0                             | 1                   |
|                     | Thailand       | 22                     | 2                             | 0                   |
|                     | Vietnam        | 0                      | 1                             | 0                   |
| Australia           |                | 0                      | 2                             | 8                   |
| Canada              |                | 0                      | 3                             | 0                   |
| Europe              | Austria        | 0                      | 1                             | 0                   |
|                     | Czech Republic | 1                      | 0                             | 0                   |
|                     | Denmark        | 0                      | 1                             | 0                   |
|                     | France         | 0                      | 0                             | 1                   |
|                     | Germany        | 0                      | 1                             | 0                   |

| Location of studies      |                               | No. cities without NSP | No. cities with & without NSP | No. cities with NSP |
|--------------------------|-------------------------------|------------------------|-------------------------------|---------------------|
|                          | Greece                        | 0                      | 1                             | 0                   |
|                          | Israel                        | 1                      | 0                             | 0                   |
|                          | Italy                         | 10                     | 0                             | 0                   |
|                          | Netherlands                   | 0                      | 0                             | 2                   |
|                          | Spain                         | 3                      | 0                             | 0                   |
|                          | Switzerland                   | 0                      | 1                             | 0                   |
| South America            | Argentina                     | 0                      | 1                             | 0                   |
|                          | Brazil                        | 5                      | 0                             | 0                   |
| United Kingdom           |                               | 0                      | 4                             | 1                   |
| United States            |                               | 13                     | 4                             | 0                   |
| <b>Total cities</b>      |                               | <b>67</b>              | <b>23</b>                     | <b>13</b>           |
| <b>Recruitment sites</b> |                               |                        |                               |                     |
|                          | Deceased                      | 0                      | 4                             | 0                   |
|                          | Detoxification/rehabilitation | 226                    | 18                            | 0                   |
|                          | Drug treatment agency         | 95                     | 72                            | 8                   |
|                          | Entry to treatment            | 33                     | 17                            | 0                   |
|                          | Field & snowball              | 16                     | 25                            | 7                   |
|                          | Health service                | 0                      | 2                             | 0                   |
|                          | HIV testing centre            | 6                      | 17                            | 0                   |
|                          | Infectious diseases hospital  | 14                     | 1                             | 0                   |
|                          | Multiple sites                | 15                     | 61                            | 6                   |
|                          | NSP/pharmacy                  | 0                      | 27                            | 35                  |
|                          | Sexual health clinics         | 4                      | 12                            | 2                   |
|                          | Other/not reported            | 26                     | 25                            | 3                   |
| <b>Total studies</b>     |                               | <b>435</b>             | <b>281</b>                    | <b>61</b>           |

**Table 3.1.2 Estimated annual rate of change in HIV seroprevalence according to weighting of analysis and sample selection for cities without and with NSPs**

| Weighting of analysis/<br>Sample selection | Cities without NSPs            | Cities with NSPs |
|--------------------------------------------|--------------------------------|------------------|
| <b>No weighting of analysis</b>            |                                |                  |
| <b>All cities</b>                          |                                |                  |
| Number                                     | 63                             | 36               |
| Mean                                       | 8.1%                           | -18.6%           |
| (95% CI)                                   | (-2.8%, 20.1%)                 | (-42.6%, 15.3%)  |
| Mean difference (95%CI)                    | -24.7% (-43.8%, 0.5%), p=0.057 |                  |

| Weighting of analysis/<br>Sample selection                                         | Cities without NSPs              | Cities with NSPs |
|------------------------------------------------------------------------------------|----------------------------------|------------------|
| <b>Cities with initial HIV prevalence &lt;10%, three calendar years of data</b>    |                                  |                  |
| Number                                                                             | 19                               | 25               |
| Mean                                                                               | 28.6%                            | -4.0%            |
| 95% CI                                                                             | (-4.9%, 73.8%)                   | (-28.5%, 29.0%)  |
| Mean difference (95%CI)                                                            | -25.3% (-50.8%, 13.3%), p=0.165  |                  |
| <b>Weighting of analysis</b>                                                       |                                  |                  |
| <b>All cities</b>                                                                  |                                  |                  |
| Number                                                                             | 63                               | 36               |
| Mean                                                                               | 5.1%                             | -29.2%           |
| (95% CI)                                                                           | (1.4%, 9.1%)                     | (-30.8%, -27.6%) |
| Mean difference (95%CI)                                                            | -32.7% (-37.5%, -27.6%), p<0.001 |                  |
| <b>Cities with initial HIV prevalence &lt;10% and three calendar years of data</b> |                                  |                  |
| Number                                                                             | 19                               | 25               |
| Mean                                                                               | 32.1%                            | 7.8%             |
| 95% CI                                                                             | (22.1%, 42.8%)                   | (-4.8%, 22.0%)   |
| Mean difference (95%CI)                                                            | -18.4% (-32.0%, -2.0%), p=0.030  |                  |

**Table 3.1.3 Location of cities and sites of recruitment for cities with HCV prevalence studies according to NSP status from the time of first to last study**

| Location of studies |            | Number of cities<br>without NSP | Number of cities<br>without & with<br>NSP | Number of cities<br>with NSP |
|---------------------|------------|---------------------------------|-------------------------------------------|------------------------------|
| Asia                | China      | 2                               | 0                                         | 0                            |
|                     | Bangladesh | 1                               | 0                                         | 0                            |
|                     | India      | 0                               | 0                                         | 1                            |
|                     | Japan      | 3                               | 0                                         | 0                            |
|                     | Malaysia   | 1                               | 0                                         | 0                            |
|                     | Nepal      | 0                               | 0                                         | 1                            |
|                     | Taiwan     | 1                               | 0                                         | 0                            |
|                     | Thailand   | 3                               | 0                                         | 1                            |
| Australia           |            | 0                               | 2                                         | 10                           |
| Canada              |            | 0                               | 0                                         | 1                            |
| Europe              | Austria    | 1                               | 1                                         | 0                            |
|                     | Belgium    | 1                               | 0                                         | 2                            |
|                     | Croatia    | 1                               | 0                                         | 0                            |

|                                   |           |           |            |
|-----------------------------------|-----------|-----------|------------|
| Denmark                           | 0         | 0         | 1          |
| France                            | 1         | 0         | 4          |
| Germany                           | 1         | 0         | 2          |
| Greece                            | 1         | 0         | 0          |
| Hungary                           | 1         | 0         | 0          |
| Iceland                           | 1         | 0         | 0          |
| Israel                            | 1         | 0         | 0          |
| Italy                             | 7         | 0         | 1          |
| Luxembourg                        | 0         | 0         | 1          |
| Netherlands                       | 0         | 0         | 1          |
| Norway                            | 1         | 0         | 0          |
| Poland                            | 2         | 0         | 0          |
| Portugal                          | 0         | 1         | 0          |
| Saudi                             | 1         | 0         | 0          |
| Slovenia                          | 0         | 0         | 1          |
| Spain                             | 3         | 1         | 2          |
| Sweden                            | 0         | 1         | 1          |
| Switzerland                       | 0         | 1         | 1          |
| New Zealand                       | 0         | 0         | 5          |
| South America                     |           |           |            |
| Argentina                         | 0         | 0         | 1          |
| Brazil                            | 2         | 0         | 0          |
| United Kingdom                    | 0         | 0         | 11         |
| United States                     | 5         | 2         | 4          |
| <b>Total cities</b>               | <b>41</b> | <b>9</b>  | <b>51</b>  |
| <b>Recruitment sites</b>          |           |           |            |
| Detoxification/rehabilitation     | 12        | 2         | 5          |
| Drug treatment agency             | 14        | 9         | 10         |
| Field & snowball                  | 6         | 2         | 9          |
| HIV testing /Sexual health centre | 4         | 5         | 14         |
| Multiple sites                    | 2         | 5         | 15         |
| NSP/pharmacy                      | 0         | 11        | 37         |
| Other                             | 6         | 11        | 11         |
| <b>Total studies</b>              | <b>44</b> | <b>45</b> | <b>101</b> |



**Table 3.1.4 Estimation of the effect of NSPs on HCV prevalence per year using random effects regression**

| Inclusion criteria                                           | logit(HCV) | Coefficient | Std. Error | p value | 95% CI                            |
|--------------------------------------------------------------|------------|-------------|------------|---------|-----------------------------------|
| <b>All cities and all data points</b>                        |            |             |            |         |                                   |
| Calendar year                                                |            | -0.008      | 0.02       | 0.7     | -0.05, 0.04                       |
| Years since NSP                                              |            | -0.079      | 0.03       | 0.003   | -0.13, -0.02                      |
| Constant                                                     |            | 1.040       | 0.24       | <0.001  | 0.56, 1.52                        |
| sigma_u                                                      |            | 0.5637      |            |         |                                   |
| sigma_e                                                      |            | 0.8082      |            |         |                                   |
| rho                                                          |            | 0.3275      |            |         | (fraction of variance due to u_i) |
| <b>All cities and excluding data points before 1981</b>      |            |             |            |         |                                   |
| Calendar year                                                |            | -0.0460     | 0.03       | 0.1     | -0.10, 0.12                       |
| Years since NSP                                              |            | -0.0576     | 0.03       | 0.05    | -0.11, -0.001                     |
| Constant                                                     |            | 92.775      | 59.3       | 0.1     | -23.5, 209.1                      |
| sigma_u                                                      |            | 0.5627      |            |         |                                   |
| sigma_e                                                      |            | 0.8084      |            |         |                                   |
| rho                                                          |            | 0.3264      |            |         | (fraction of variance due to u_i) |
| <b>All nine cities with data points before and after NSP</b> |            |             |            |         |                                   |
| Calendar year                                                |            | 0.0446      | 0.04       | 0.2     | -0.03, 0.11                       |
| Years since NSP                                              |            | -0.1317     | 0.05       | 0.01    | -0.24, -0.03                      |
| Constant                                                     |            | -87.17      | 70.8       | 0.2     | -226, 51.6                        |
| sigma_u                                                      |            | 0.2255      |            |         |                                   |
| sigma_e                                                      |            | 0.8245      |            |         |                                   |
| rho                                                          |            | 0.0696      |            |         | (fraction of variance due to u_i) |

**Table 3.1.5 Summary of HCV prevalence rates among people reporting less than three years of drug injection according to availability of NSPs**

| NSP      | Number of studies | Mean HCV prevalence | Standard deviation | Median HCV prevalence | Inter-quartile range |
|----------|-------------------|---------------------|--------------------|-----------------------|----------------------|
| No NSP   | 5                 | 66%                 | 15%                | 71%                   | 5%                   |
| With NSP | 43                | 25%                 | 18%                | 19%                   | 21%                  |

**Table 3.1.6 Estimation of the effect of NSPs on HCV prevalence among people reporting less than three years of drug injection using random effects regression**

| HCV prevalence | Coefficient | Std. Error | p value | 95% CI                            |
|----------------|-------------|------------|---------|-----------------------------------|
| NSP            | -37.06      | 7.75       | <0.001  | -52.25, -21.86                    |
| Constant       | 64.50       | 8.41       | <0.001  | 48.01, 80.98                      |
| sigma_u        | 22.74       |            |         |                                   |
| sigma_e        | 8.70        |            |         |                                   |
| rho            | 0.87        |            |         | (fraction of variance due to u_i) |

**Table 3.1.7 HCV incidence rates per 100 person years for cohorts according to availability of NSPs**

| NSP      | Number of studies | Mean HCV incidence | Standard deviation | Median HCV prevalence | Inter-quartile range |
|----------|-------------------|--------------------|--------------------|-----------------------|----------------------|
| No NSP   | 3                 | 24.7/100py         | 16.9               | 28.6/100py            | 33.1                 |
| With NSP | 24                | 16.4/100py         | 9.9                | 15.0/100py            | 10.6                 |

**Table 3.1.8 Comparison of HCV incidence in cohorts with and without NSP using negative binomial regression modeling**

| Type of model/<br>scnumber                    | IRR   | Std. Error | p value | 95% CI      |
|-----------------------------------------------|-------|------------|---------|-------------|
| <b>Random effects negative binomial model</b> |       |            |         |             |
| NSP                                           | 0.55  | 0.25       | 0.18    | 0.23, 1.32  |
| Total pyrs<br>(exposure)                      |       |            |         |             |
| /ln_r                                         | 2.38  | 0.95       |         | 0.52, 4.24  |
| /ln_s                                         | 3.45  | 1.17       |         | 1.16, 5.75  |
| r                                             | 10.81 | 10.27      |         | 1.68, 69.53 |
| s                                             | 31.62 | 37.01      |         | 3.19, 313.5 |
| <b>GEE negative binomial model</b>            |       |            |         |             |
| NSP                                           | 0.69  | 0.47       | 0.58    | 0.19, 2.54  |
| Total pyrs<br>(exposure)                      |       |            |         |             |

**Table 3.1.9 HCV incidence rates per 100 person years for each city overall according to availability of NSPs**

| NSP      | Number of studies | Mean HCV incidence | Standard deviation | Median HCV prevalence | Inter-quartile range |
|----------|-------------------|--------------------|--------------------|-----------------------|----------------------|
| No NSP   | 3                 | 24.7/100py         | 16.9               | 28.6/100py            | 33.1                 |
| With NSP | 14                | 18.5/100py         | 11.4               | 15.9/100py            | 16.2                 |

**Table 3.1.10 Comparison of HCV incidence for each city with and without NSP using negative binomial regression modeling**

| Type of model/<br>scnumber                    | IRR   | Std. Error | p value | 95% CI       |
|-----------------------------------------------|-------|------------|---------|--------------|
| <b>Random effects negative binomial model</b> |       |            |         |              |
| NSP                                           | 0.73  | 0.30       | 0.44    | 0.32, 1.64   |
| Total pyrs<br>(exposure)                      |       |            |         |              |
| /lnalpha                                      | -1.28 | 0.45       |         | -2.16, -0.40 |
| alpha                                         | 0.28  | 0.13       |         | 0.12, 0.67   |

Figure 3.1a Fitted HIV prevalence in cities without NSPs.

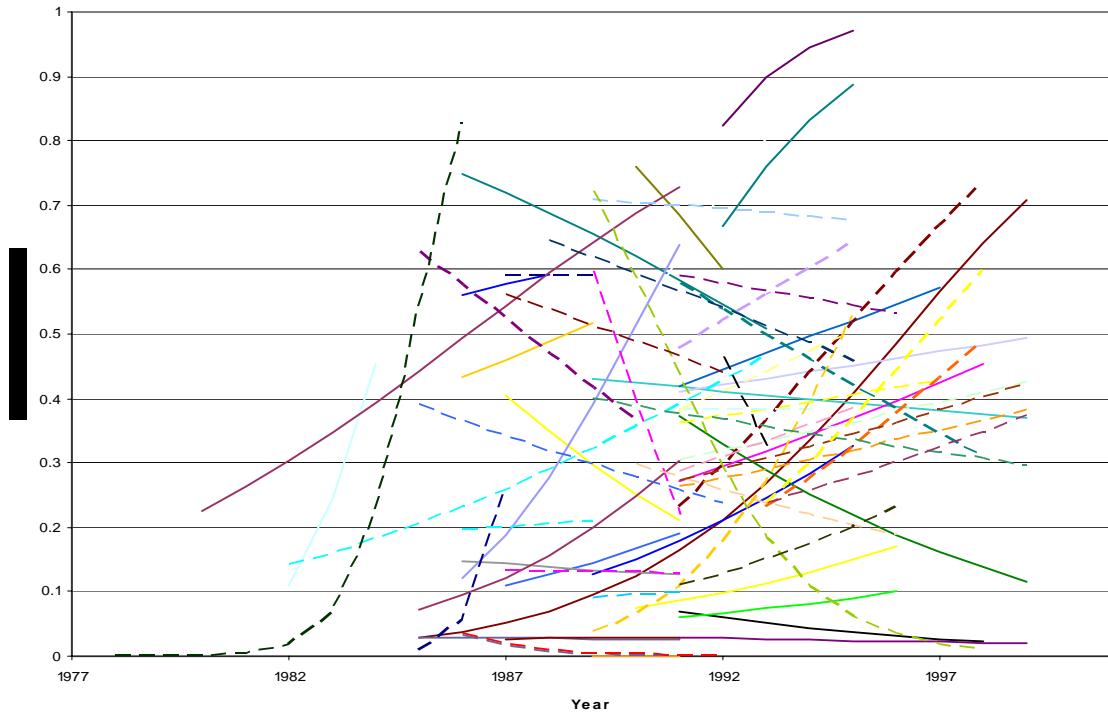

Figure 3.1b Fitted HIV prevalence in cities with NSPs.

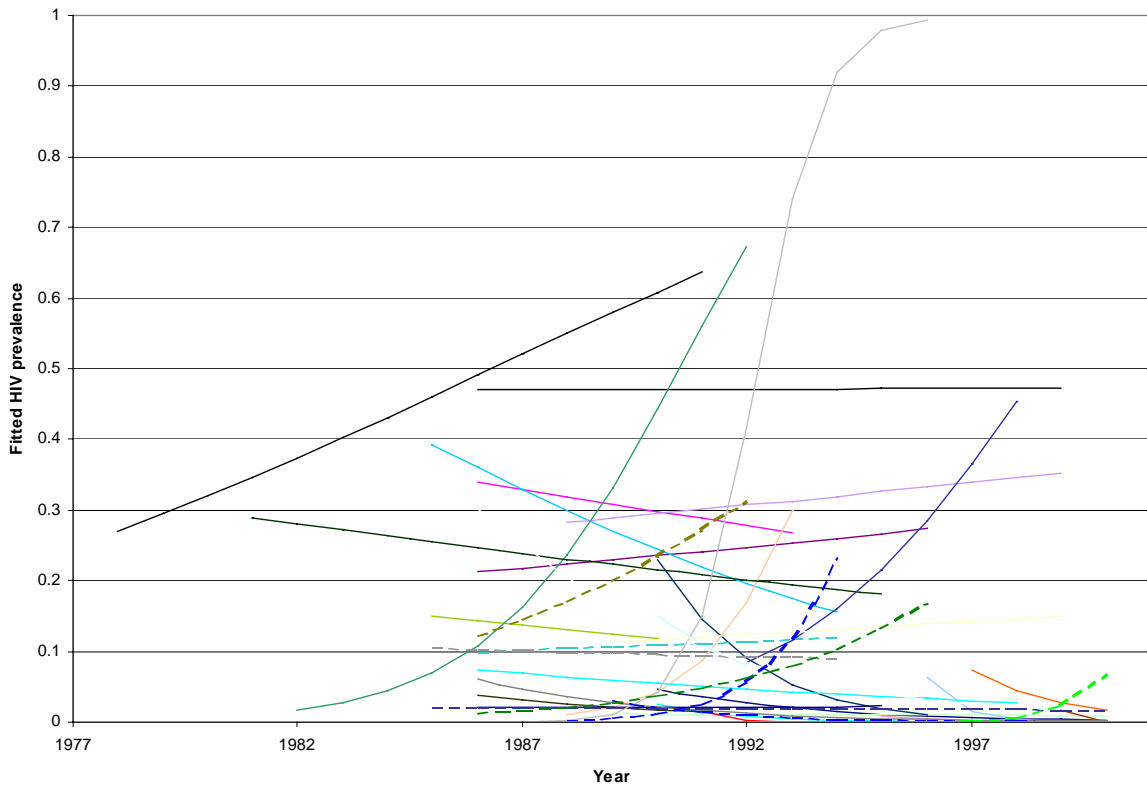

Figure 3.1c HIV seroprevalence in injecting drug users per year of survey for a city without NSP, Songkla Province, Thailand. (Lines represent fitted values from the logistic regression model)

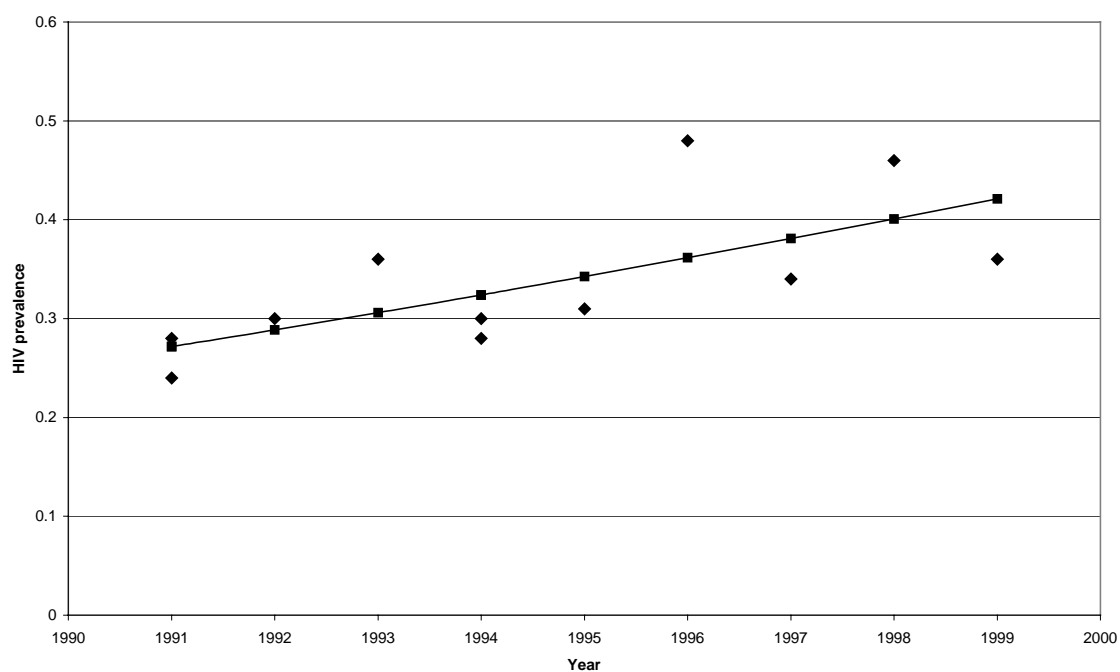

Figure 3.1d HIV seroprevalence in injecting drug users per year of survey for a city with NSP, Sydney, Australia. (Lines represent fitted values from the logistic regression model)

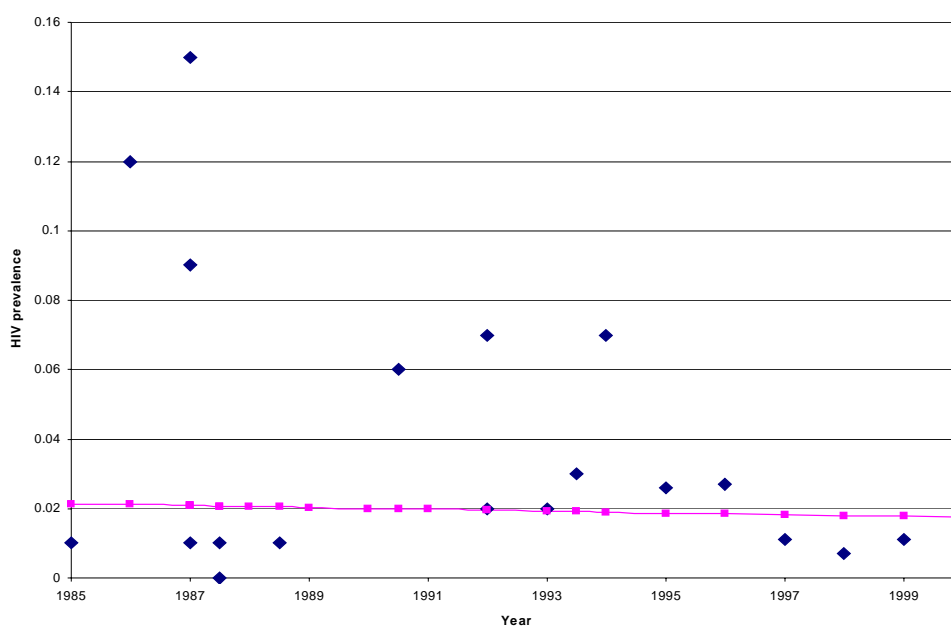

Figure 3.2 HCV seroprevalence among injecting drug users according to NSP status of city and year of study

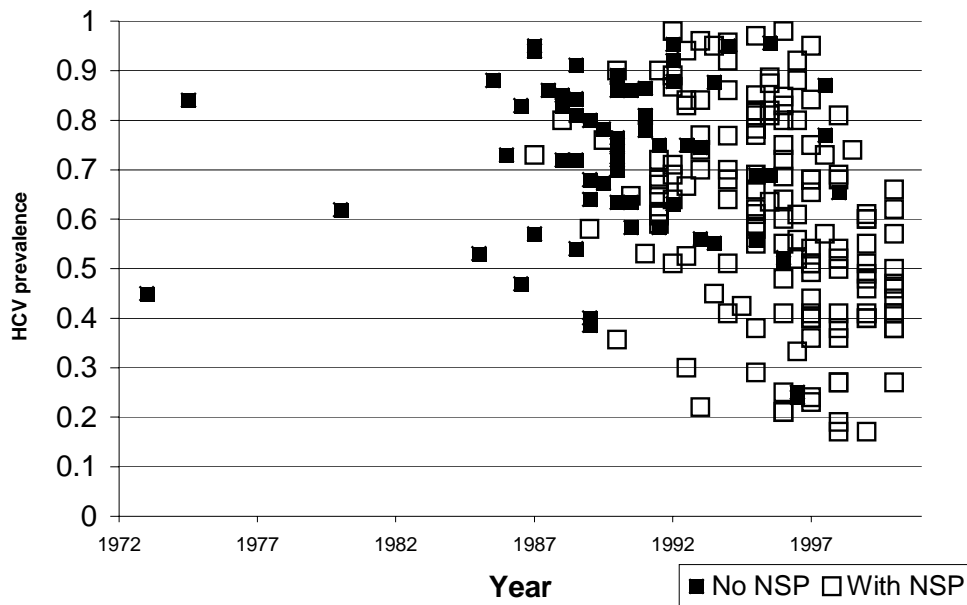

Figure 3.3 HCV seroprevalence among people reporting less than three years of drug injection according to NSP status of city and year of study

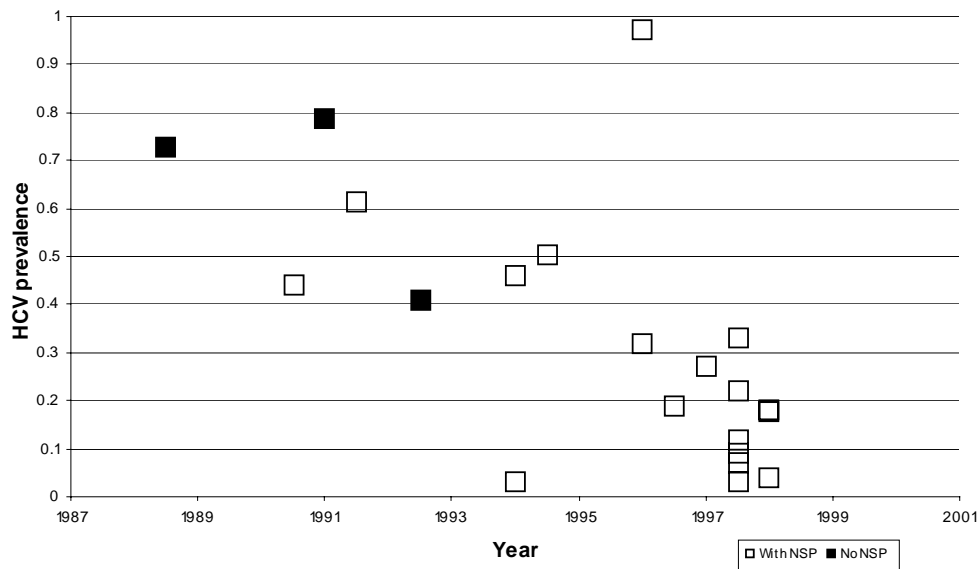

---

## 3.2 METHODOLOGY FOR ESTIMATES OF NUMBERS OF PEOPLE LIVING WITH HIV ACQUIRED THROUGH INJECTING DRUGS

### 3.2.1 ESTIMATES AND PROJECTIONS OF HIV/AIDS INCIDENCE

Estimates of past HIV incidence and future AIDS incidence as a result of injecting drug use were obtained using back-projection methods. The method uses observed AIDS incidence data (adjusted for reporting delay), and knowledge of the rate at which HIV infected people progress to AIDS, to reconstruct the likely pattern of past HIV incidence. It is then also possible to estimate future AIDS incidence. The form of back-projection used was that suggested by Becker et al (1991), as modified by Marschner and Watson (1992). Because of the relatively small numbers of AIDS cases reported due to injecting drug use, back-projection analyses were applied to annual AIDS counts.

The baseline rate of progression to AIDS was modelled using a Weibull-with-levelling distribution (Rosenberg et al. 1992), corresponding to a median time to AIDS of just under 10 years and a progression rate of 11.2% at four years (Alcabes et al. 1993). The extended definition of AIDS, adopted in Australia in January 1988, was assumed to result in a 10% increase in the rate of progression to AIDS (Rosenberg et al. 1992).

Because of the uncertainties surrounding both the effect of combination antiretroviral treatments in reducing the rate of progression to AIDS, and the numbers of people living with HIV infection taking up such treatments, back-projections were performed using the following methods. First, a back-projection based on AIDS cases diagnosed to the end of 1994 was performed to estimate the pattern of HIV incidence up to this time. Over this period only moderately effective antiretroviral treatments were available, assumed to correspond to an overall 10% reduction in the rate of progression to AIDS, so the pattern of past HIV incidence can be reliably reconstructed. Second, the effects of improved combination treatments since the beginning of 1995 were then estimated, based on the estimated pattern of HIV incidence, so as to closely approximate AIDS incidence observed between 1996 and 2000.

The effects of improved combination treatments on reducing the overall rate of progression to AIDS were estimated based on cases of AIDS reported due to injecting drug use, and are summarised in the Table 3.2.1 below.

**Table 3.2.1 Estimated percentage effect of combination antiretroviral treatments in reducing the overall rate of progression to AIDS between 1995 and 1999**

| Year                                        | 1996 | 1997 | 1998 | 1999 | 2000 |
|---------------------------------------------|------|------|------|------|------|
| Estimated reduction in progression rate (%) | 77   | 69   | 60   | 52   | 44   |

Projections of AIDS incidence from 2001 onwards were made by assuming that the effect of treatments on the rate of progression to AIDS continued at the year 2000 level.

In analyses HIV incidence was fixed at 20 cases per year from 1994 onwards. The level at which HIV incidence was fixed was decided on the basis of the number of HIV diagnoses and diagnoses of newly acquired HIV infection reported to the National HIV Database, and was also chosen to be consistent with the estimated HIV incidence obtained from the back-projection analyses.

Back-projection estimates of HIV incidence need to be adjusted for underreporting of AIDS diagnoses, and deaths prior to AIDS. Reporting of AIDS cases was thought to be relatively complete in Australia, with completeness estimated to be at least 95% (Grulich et al. 1999). Deaths among IDUs are estimated to be approximately 1% per annum (Thorley 1981; English et al. 1995). The median time to AIDS is thought to be just

---

under 10 years, so, taken together, HIV incidence was inflated by 15% to allow for underreporting of AIDS and deaths prior to AIDS.

### **3.2.2 ESTIMATES OF THE NUMBER OF INJECTING DRUG USERS LIVING WITH HIV INFECTION**

Estimates of the number of IDUs living with HIV infection by disease stage (CD4+ cell count more than 500/ $\sigma$ l, a CD4+ cell count of less than 500/ $\sigma$ l and AIDS free, or living with AIDS) were based on the estimated pattern of past HIV incidence. The rate of progression to a CD4+ cell count fewer than 500/ $\sigma$ l was modelled using a similar Weibull-with-levelling distribution to that used to model the time from HIV infection to AIDS. The median time from HIV infection to a CD4+ cell count of 500/ $\sigma$ l was assumed to be 4 years, with 95% below 500/ $\sigma$ l by 10 years. Survival following AIDS among IDUs in Australia was reasonably consistent between 1988 and 1995. The effect of combination antiretroviral treatment in improving survival following AIDS from 1996 was assumed to be similar to the effect of treatment in reducing the rate of progression to AIDS in Table 3.2.1, and to continue at the year 2000 rate from 2001 onwards. Background death rates were based on ABS life tables, assuming that the mean age at HIV seroconversion among IDUs was 30 years, and that there were 3 male HIV-infected IDUs for each female HIV-infected IDU (ABS 1995).

### **3.2.3 ESTIMATING THE NUMBER OF INJECTING DRUG USERS LIVING WITH HIV WITHOUT NSPs**

The effect of needle and syringe programs (NSPs) in reducing HIV transmission among IDUs has been estimated to correspond to an annual reduction in (logit) HIV prevalence of 0.28 (see Section 3.1).

HIV prevalence among IDUs in Australia between 1980 and 2000 was based on the estimated numbers of IDUs living with HIV described above, and estimates of the numbers of IDUs in Australia.

Numbers of IDUs in Australia were estimated as follows. The number of dependent heroin users in Australia in 1997 was assumed to be 75,000 (Hall et al. 2000). A reasonable fit to available estimates over the previous two decades was obtained by assuming a constant net 8% increase in dependent heroin users per year. To allow for injecting of other drugs, the total number of regular IDUs was assumed to be 33% greater than the number of dependent heroin users (i.e. 100,000 regular IDUs in 1997 (Law 1999)). The number of occasional IDUs was assumed to be 175,000 in 1997 (Law 1999) with the same annual percentage increases.

NSPs were first introduced in Australia in late 1987. Hence, NSPs were assumed to have reduced HIV prevalence among IDUs from 1988 onwards. The pattern of HIV prevalence if NSPs had not been introduced was estimated by increasing (logit) HIV prevalence by 0.28 per year from 1988 onwards. From this, a pattern of HIV incidence if NSPs had not been introduced was derived.

Estimates of the numbers of IDUs living with HIV by disease stage if NSPs had not been introduced were obtained by applying the same models described above regarding rates of progression from HIV infection to CD4+ cell count <500 cells/ $\sigma$ l, to AIDS and survival before and following AIDS.

### **3.2.4 ESTIMATED EFFECT OF NSPs IN REDUCING NUMBERS OF INJECTING DRUG USERS WITH HIV BY DISEASE STAGE**

To allow costing of the effect of NSPs in reducing the number of people living with HIV, estimates of the reduction in the number of people living with HIV by disease stage were obtained by subtracting the estimates obtained with NSPs from the corresponding estimates without NSPs. In these analyses, HIV incidence due to injecting drug use was assumed to cease from 2001 onwards, and estimates were projected forward until all people infected with HIV were estimated to have died.

---

### **3.3 METHODOLOGY FOR ESTIMATES OF NUMBERS OF PEOPLE LIVING WITH HCV ACQUIRED THROUGH INJECTING DRUGS**

#### **3.3.1 ASSUMPTIONS USED IN MODELS OF HCV INCIDENCE**

The incidence of HCV in Australia was modelled based on the following assumptions regarding the past pattern of injecting drug use in Australia:

- There were 100,000 regular IDUs in 1997 (Hall et al. 2000), with a constant net increase of 8% per year since 1970, and with 5% stopping injecting each year (Thorley 1981; English et al. 1995).
- There were 175,000 occasional IDUs in 1997, with a constant net increase of 8% per year since 1970, and with 10% stopping injecting each year (Law 1999).
- There were no IDUs in 1960, with a linear increase in the number of both regular and occasional IDUs between 1960 and 1970.

Other assumptions made in modelling HCV incidence were the same as those adopted by the HCV Projections Working Group (Law 1999):

- 65% of IDUs who start injecting regularly have previously injected occasionally (from the Delphi study).
- The HCV incidence rate in uninfected regular IDUs was taken to be 18% per annum from 1960 until 1985, after which it was taken to decrease linearly to 13% in 1989 and thereafter.
- The HCV incidence rate in occasional IDUs was taken to be 20% of that in regular IDUs.
- All people starting or stopping injecting, or becoming regular rather than occasional IDUs, did so independent of their HCV status.
- HCV incidence due to receipt of infected blood or blood products was taken to be 15% of HCV incidence in IDUs until the early 1980s, after which it was assumed to have gradually decreased following the introduction of donor self-deferral related to injecting drugs (which began in 1983), and to be stopped entirely from 1990 onwards with the introduction of blood donor screening for HCV.
- HCV incidence through other transmission routes (such as needle stick injuries in health care workers, or tattoos) was taken to be 10% of HCV incidence in IDUs between 1987 and 1997, reflecting the data on risk factors for recent incident HCV infections. Prior to 1987 it was assumed to increase linearly to 20% of HCV incidence in IDUs in 1977, and then fixed at this absolute number of infections per year prior to this, again broadly consistent with data on risk factors for prevalent HCV infections, and for people with HCV infection attending liver clinics.
- The number of HCV infections between 1950 and 1960 was held constant at a low level proportional to the modelled HCV incidence among IDUs. Any HCV infections prior to 1950 were assumed to have negligible effect on estimates and projections, and were not modelled.

#### **3.3.2 ESTIMATES OF RATES OF HCV-RELATED LIVER DISEASE PROGRESSION**

It was assumed that 75% of people exposed to HCV developed HCV chronic infection (i.e. 25% of exposed people cleared HCV) (Law 1999). Of people with chronic HCV infection, it was assumed that one third had normal ALT values, one third abnormal ALT values, and one third abnormal ALT values with further covariates which indicate they would be at increased risk of progression (eg high alcohol intake). Rates of progression from stage 0/1 liver disease to stage 2/3 liver disease, and from stage 2/3 disease to cirrhosis are shown in Table 3.3.1.



**Table 3.3.1 Annual rates of liver disease progression**

| Disease Stage                                 | Stage 0/1 to Stage 2/3 | Stage 2/3 to Cirrhosis |
|-----------------------------------------------|------------------------|------------------------|
| Not chronic HCV                               | 0%                     | 0%                     |
| Chronic HCV, normal ALT                       | 1%                     | 1%                     |
| Chronic HCV, abnormal ALT                     | 2%                     | 2%                     |
| Chronic HCV, normal ALT and further cofactors | 3%                     | 3%                     |

Note: Stage 0=no hepatic fibrosis, stage 1=minimal hepatic fibrosis; stage 2=moderate hepatic fibrosis; stage 3=severe hepatic fibrosis; stage 4=cirrhosis.

Taken together, these assumptions combine so that of all people exposed to HCV, 5.3% are estimated to develop cirrhosis by 20 years, with 7.1% of people with chronic HCV developing cirrhosis by 20 years. This is consistent with current evidence regarding progression rates to cirrhosis (Freeman et al. 2001).

Rates of developing liver failure or hepatocellular carcinoma (HCC) from cirrhosis were assumed to be 4% and 1% respectively (Fattovich et al. 1997). It was further assumed that HCC could develop following liver failure, but not vice-versa. HCV-related mortality following cirrhosis was taken to be 1.5% per annum (Fattovich et al. 1997).

Mortality unrelated to HCV, both before and after cirrhosis, was assumed to be 1% per year (Thorley 1981; English et al. 1995) due to injecting drug use. Background mortality was based on ABS life tables, assuming that the mean age at HCV seroconversion among IDUs was 25 years, and that there were 2 male HCV-infected IDUs for each female HCV-infected IDU (ABS 1995).

Estimates of the numbers of people living with HCV by disease stage, and the incidence of liver cancer and HCC, were derived by combining these progression rates with the HCV incidence pattern estimated through the models described above.

### **3.3.3 ESTIMATES OF THE NUMBER OF INJECTING DRUG USERS LIVING WITH HCV WITHOUT NSPs**

The modelled estimate of HCV incidence in Australia that has occurred with NSPs described above corresponds to a gradual increase in HCV prevalence among regular IDUs until the mid- to late-1980s, followed by a gradual decline to around 52% HCV prevalence in 2000. NSPs were first introduced in Australia in late 1987. Hence, NSPs were assumed to have reduced HCV prevalence among IDUs from 1988 onwards. The pattern of HCV prevalence if NSPs had not been introduced was estimated by assuming that HCV prevalence would have remained constant at 1988 levels from 1988 onwards. From this, a pattern of HCV incidence if NSPs had not been introduced was derived. It was further assumed that the introduction of NSPs had no effect on HCV transmissions through routes other than injecting drug use.

Estimates of the numbers of people living with HCV by disease stage if NSPs had not been introduced were then derived using the same progression rate distributions described above.

### **3.3.4 ESTIMATED EFFECT OF NSPs IN REDUCING NUMBERS OF INJECTING DRUG USERS WITH HCV BY DISEASE STAGE**

To allow costing of the effect of NSPs in reducing the number of IDUs living with HCV, estimates of the reduction in the number of people living with HCV by disease stage were obtained by subtracting the estimates obtained with NSPs from the corresponding estimates without NSPs. In these analyses, HCV incidence due to injecting drug use was assumed to cease from 2001 onwards, and estimates were projected forward until all people infected with HCV were estimated to have died, either from HCV-related or unrelated mortality.

---

### 3.4 NUMBER OF HIV INFECTIONS PREVENTED THROUGH THE INTRODUCTION OF NSPs

#### 3.4.1 ESTIMATES OF INJECTING DRUG USERS LIVING WITH HIV/AIDS WITH NSP INTRODUCTION

Estimates and projections of the number of people living with HIV acquired through injecting drug use by disease stage and HIV/AIDS-related deaths from 1981 through 2070 are provided in Table 3.4.1 (See Appendix C). The number of people living with HIV/AIDS is estimated to have peaked in the early 1990s at approximately 470 cases, with a peak in people living with AIDS of less than 100 in the late 1990s. The cumulative number of deaths from HIV/AIDS by 2010 is projected to be approximately 350.

#### 3.4.2 ESTIMATES OF INJECTING DRUG USERS LIVING WITH HIV/AIDS WITHOUT NSP INTRODUCTION

Corresponding estimates and projections of the number of people living with HIV/AIDS by disease stage and HIV/AIDS-related deaths without the introduction of NSPs are provided in Table 3.4.2 (See Appendix C). The number of people living with HIV/AIDS was estimated to peak in 2000 at approximately 26,000, with a peak in people living with AIDS of almost 3,000 in 2010. The estimated cumulative number of deaths from HIV/AIDS by 2010 was approximately 5,000.

#### 3.4.3 ESTIMATES OF HIV INFECTIONS AND HIV/AIDS DEATHS PREVENTED THROUGH NSP INTRODUCTION

Estimates of the number of HIV infections and HIV/AIDS deaths prevented through the introduction of NSPs (over the period 1988 through 2000) are provided in Table 3.4.3 (See Appendix C). By the year 2000, approximately 25,000 HIV infections are estimated to have been prevented since the introduction of NSP in 1988, and by 2010 approximately 4,500 deaths are projected to have been prevented.

#### 3.4.4 ESTIMATES OF HIV/AIDS CASES PREVENTED BY DISEASE STAGE AND DIAGNOSIS CATEGORY

An estimated 90% of the Australian HIV-infected population is diagnosed (NCHECR 2001). We have assumed that the proportion diagnosed is 100% for people with AIDS, and would be higher among people with progressive HIV disease ( $CD4 < 500/mm^3$ ) than people with early HIV disease ( $CD4 > 500/mm^3$ ) (Table 3.4.4).

Based on data from the Australian HIV Observational Database (AHOD) over the period January 1997- March 2001, 71% of people with diagnosed HIV infection in Australia were receiving antiretroviral therapy. The proportion of injecting drug users receiving antiretroviral therapy was not significantly different to other risk categories (63% versus 71%,  $p > 0.05$ ). The proportion of people receiving antiretroviral therapy is 90% for AIDS, 50% for  $CD4 < 500/mm^3$ , and 69% for  $CD4 > 500/mm^3$ . Due to probable selection bias in AHOD for people with early HIV disease who are receiving antiretroviral therapy, the population level proportion is likely to be somewhat lower. Therefore, 40% of people with early stage HIV disease have been estimated to be receiving antiretroviral therapy.

Table 3.4.4 Proportions of people with diagnosed HIV and antiretroviral therapy use by disease stage

| Disease stage                                | Diagnosed/Undiagnosed (%) | Antiretroviral therapy among diagnosed group <sup>1</sup> |
|----------------------------------------------|---------------------------|-----------------------------------------------------------|
| Early HIV disease ( $CD4 \geq 500/mm^3$ )    | 80/20                     | 40%                                                       |
| Progressive HIV disease ( $CD4 < 500/mm^3$ ) | 90/10                     | 70%                                                       |
| AIDS                                         | 100/0                     | 90%                                                       |

All people with undiagnosed HIV are assumed to not be receiving antiretroviral therapy.

Estimates of the number of HIV/AIDS cases prevented through the introduction of NSP by disease category and diagnosis category are provided in Table 3.4.5 (See Appendix C). These estimates form the basis for the calculation of the health care cost savings provided by the introduction of NSPs.

---

### 3.5 NUMBER OF HCV INFECTIONS PREVENTED THROUGH THE INTRODUCTION OF NSPs

#### 3.5.1 ESTIMATES OF INJECTING DRUG USERS WITH HCV AND HCV-RELATED DEATHS WITH NSP INTRODUCTION

Estimates and projections of the number of people living with HCV acquired through injecting drug use by disease stage and HCV-related deaths from 1961 through to 2075 with the introduction of NSPs are provided in Table 3.5.1 (See Appendix C). In 2000, the number of people living with HCV is estimated to be approximately 200,000 (approximately 150,000 with chronic HCV infection). By 2010 an estimated 11,800 people are projected to be living with cirrhosis, and estimated cumulative HCV-related deaths are projected to be 1,800.

#### 3.5.2 ESTIMATES OF INJECTING DRUG USERS WITH HCV AND HCV-RELATED DEATHS WITHOUT NSP INTRODUCTION

Corresponding estimates and projections of the number of people living with HCV by disease stage and HCV-related deaths without the introduction of NSPs are provided in Table 3.5.2 (See Appendix C). In 2000, the number of people living with HCV is estimated to be approximately 220,000 (approximately 165,000 with chronic HCV infection). By 2010 an estimated 12,500 people are projected to be living with cirrhosis, and estimated cumulative HCV-related deaths are projected to be 1,900.

#### 3.5.3 ESTIMATES OF HCV INFECTIONS AND DEATHS PREVENTED THROUGH NSP INTRODUCTION

Estimates of the number of HCV infections and HCV-related deaths prevented through the introduction of NSPs (over the period 1988 through 2000) are provided in Table 3.5.3 (See Appendix C). By the year 2000, approximately 21,000 HCV infections are estimated to have been prevented since the introduction of NSP in 1988, (of which approximately 16,000 would have developed chronic HCV); while by 2010 approximately 650 fewer people are projected to be living with cirrhosis and 90 HCV-related deaths would have been prevented.

#### 3.5.4 ESTIMATES OF HCV CASES PREVENTED BY DISEASE STAGE AND DIAGNOSIS CATEGORY

In Australia, an estimated 70% of people living with hepatitis C are diagnosed (NCHECR 2001). Table 3.5.4 outlines the estimates of diagnosed chronic hepatitis C by stage of liver disease. It was assumed that proportions of diagnosed chronic hepatitis C would increase with disease stage to reach 100% for advanced liver disease complications (HCC, liver failure).

**Table 3.5.4 Proportions of people with diagnosed chronic hepatitis C at different disease stages**

| Disease stage                | Diagnosed/Undiagnosed (%) |
|------------------------------|---------------------------|
| Mild chronic hepatitis C     | 60/40                     |
| Moderate chronic hepatitis C | 75/25                     |
| Compensated cirrhosis        | 80/20                     |
| Liver failure                | 100/0                     |
| Hepatocellular carcinoma     | 100/0                     |

Note: An estimated 70% (140,000/200,000) of people living with hepatitis C in Australia are aware of their HCV status (NCHECR 2001).

Estimates of the number of HCV cases prevented through the introduction of NSP by disease stage and diagnosis category are provided in Table 3.5.5 (See Appendix C). These estimates form the basis for the calculation of the health care cost savings provided by the introduction of NSPs. Although there may be quality of life impairment and health care costs for people who are HCV antibody positive but do not have chronic hepatitis C, we have taken the conservative approach of basing our analyses on cases of chronic hepatitis C only.

---

## 4 FINANCIAL EFFECTS OF NSPs

An economic model was developed that compares the costs of operating NSPs during the 1990s to the anticipated savings that will accrue from the number of cases of HIV and HCV avoided as a result of NSPs. This section describes the data sources and methodology used in the financial analysis.

### 4.1 DESCRIPTION OF THE ECONOMIC MODEL

#### 4.1.1 OVERVIEW

The model used to analyse the financial effects of NSPs examines the direct costs of operating NSPs during the 1990s, and compares those costs to the future financial savings that are anticipated to flow from that investment. In this instance, these savings relate to the direct costs of treatment of cases of HIV and HCV that would otherwise have occurred until death, had it not been for the existence of NSPs. Because the investment in NSPs occurred over a ten year period, while the savings will continue to accrue into the future until all cases avoided have died, the cashflows associated with both are discounted back to a common reference point, namely the commencement of the investment period. The net value of these two cashflow streams after discounting, known as the Net Present Value, takes into account the fact that a dollar today is valued more highly than a dollar in, say, ten years, and thus converts them to a common dollar equivalent. The concept of discounting cashflows thus enables us to assess the current value of future costs and savings for any investment decision.

#### 4.1.2 DIRECT AND INDIRECT COSTS AND BENEFITS

The issue of whether to include both direct and indirect costs and benefits was considered during the course of the design development. It was decided that in undertaking the analysis, only direct costs and benefits will be included.

- Direct costs include the costs of operating NSPs themselves, the infrastructure associated with their development and operation, and the costs of safe disposal of used syringes and needles. Conceptually, direct costs may also include the costs of volunteers and other unpaid workers in NSPs, and in-kind support provided by host agencies. However, the data reported by State and Territory health authorities were not able to identify or quantify this component, and it is therefore excluded from the analysis.
- Direct cost offsets or savings are those related to reduced costs due to the prevention or avoidance of HIV and HCV attributable to NSPs. These have been based on the lifetime costs of treatment of the diseases, and are discussed further below.

Indirect costs include productivity losses brought about by increased illness. Examples of indirect benefits include the value of increased productivity due to lives saved and extended employment. Typically, economic evaluations that have included indirect costs and benefits have demonstrated them to be many times the value of direct costs and benefits. In many cases, their inclusion has so overwhelmed the value of the direct benefits, that they have dominated the outcome. However, their measurement has often been the subject of considerable debate and criticism. This is particularly so when dealing with specific sub-populations, in this case injecting drug users.

At the same time, while the major focus of the study is on the public health perspective, it should be recognised that programs of this type may have implications for many other aspects of society that are not reflected in the economic analysis.

Given this history, together with the requirement that this study be based on a strong evidence base and be able to withstand close scrutiny, we have excluded indirect costs and benefits from the main economic analysis. However, it should be recognised that these costs and benefits exist, even if they are not quantified in the analysis.

## 4.2 EXPENDITURE ON NSPs

Data on the expenditure on operating NSPs in Australia during the 1990s was sought from all State and Territory health authorities by way of a standard survey instrument. A spreadsheet with explanatory comments and notes was provided to all authorities, with the request that they complete the fields as far as available data enabled.

Expenditure was identified under the following components:

- Overhead and infrastructure expenditure;
- Direct operating expenditure on public NSPs;
- Subsidies paid to community pharmacies; and
- Consumer expenditure.

All States and Territories provided the data sought, though to varying degrees of completion. In nearly all instances, data was provided for at least the last three to five years of the study period. Where data was not available, estimates were imputed for each component, based on trends within that component for the respective State/Territory. Table 4.2.1 illustrates the aggregate expenditure on NSPs across Australia for the period 1990/91 to 1999/2000, expressed in Year 2000 prices.

Table 4.2.1 Expenditure on NSPs, Australia, 1990-91 to 1999-2000 (\$'000)<sup>(1)</sup>

| 1990-1991                                          | 1991-1992 | 1992-1993 | 1993-1994 | 1994-1995 | 1995-1996 | 1996-1997 | 1997-1998 | 1998-1999 | 1999-2000 | Total     |
|----------------------------------------------------|-----------|-----------|-----------|-----------|-----------|-----------|-----------|-----------|-----------|-----------|
| <b>Overhead and Infrastructure Costs</b>           |           |           |           |           |           |           |           |           |           |           |
| \$441                                              | \$455     | \$530     | \$560     | \$541     | \$539     | \$714     | \$757     | \$841     | \$1,153   | \$6,531   |
| <b>Direct Operating Expenditure on Public NSPs</b> |           |           |           |           |           |           |           |           |           |           |
| \$7,215                                            | \$7,730   | \$8,172   | \$8,710   | \$9,089   | \$10,251  | \$12,213  | \$13,250  | \$13,690  | \$15,243  | \$105,562 |
| <b>Subsidies to Community Pharmacies</b>           |           |           |           |           |           |           |           |           |           |           |
| \$826                                              | \$1,045   | \$1,129   | \$1,318   | \$1,497   | \$1,551   | \$2,079   | \$2,347   | \$2,975   | \$3,278   | \$18,045  |
| <b>Consumer Costs</b>                              |           |           |           |           |           |           |           |           |           |           |
| \$1,091                                            | \$1,183   | \$1,608   | \$1,905   | \$1,865   | \$1,555   | \$2,043   | \$2,625   | \$2,930   | \$3,001   | \$19,807  |
| <b>Total Government Direct Expenditure</b>         |           |           |           |           |           |           |           |           |           |           |
| \$8,042                                            | \$8,774   | \$9,301   | \$10,028  | \$10,586  | \$11,802  | \$14,292  | \$15,597  | \$16,664  | \$18,521  | \$123,607 |
| <b>Total Government Expenditure</b>                |           |           |           |           |           |           |           |           |           |           |
| \$8,483                                            | \$9,230   | \$9,831   | \$10,589  | \$11,127  | \$12,341  | \$15,006  | \$16,354  | \$17,505  | \$19,673  | \$130,138 |
| <b>Total Expenditure</b>                           |           |           |           |           |           |           |           |           |           |           |
| \$9,574                                            | \$10,413  | \$11,438  | \$12,494  | \$12,992  | \$13,897  | \$17,048  | \$18,979  | \$20,435  | \$22,674  | \$149,944 |

<sup>(1)</sup> Year 2000 Prices

Over the decade, a total of \$150 million (Year 2000 prices) was expended on NSPs across Australia, comprised of \$130 million (87%) by government, and \$20 million (13%) in consumer expenditure. Overhead and infrastructure costs (\$7 million) accounted for 5% of government expenditure, with direct operating costs of public NSPs (\$106 million) accounting for a further 81%, and subsidies paid to community pharmacies for NSP services (\$18 million) the remaining 14%.

After adjusting for inflation over the period, total expenditure on NSPs increased by 2.3 times over the ten years. Figure 4.1 illustrates the growth in real expenditure of the various components over the ten-year period.

Figure 4.1 Expenditure on NSPs, 1990-91 to 1999-2000 (Year 2000 Prices)

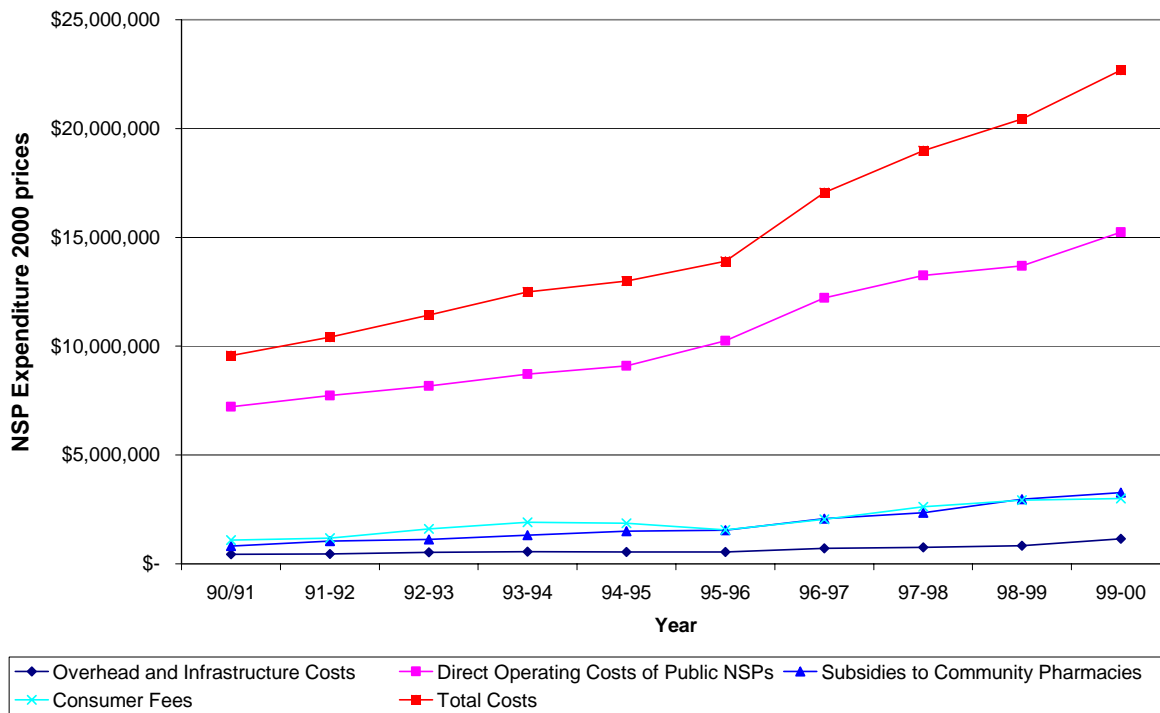

It should be noted that the data presented above covers expenditure on NSPs operating within the programs managed by State and Territory health authorities. Many retail pharmacies also sell needles and syringes on a commercial basis, for which reliable data is not available on the number of needles sold or the level of expenditure by consumers. The relative activity of the retail market in this area varies considerably between States (eg in Queensland, an estimated 5 million needles are distributed through the retail market). Costs of needle and syringes bought through the retail market are borne by consumers rather than through government subsidy. Consequently the total investment by consumers in needle and syringes may be understated in the analysis. For the purposes of illustration, sensitivity analysis has been conducted to assess the impact of doubling the above expenditure figures, and is presented in Section 4.8.

### 4.3 IMPACTS OF NSPs ON HIV AND HCV

The impact of NSPs on HIV and HCV is presented in Section 3, and was prepared by the National Centre in HIV Epidemiology and Clinical Research, The University of New South Wales. Estimates of the number of HIV and HCV infections avoided through the introduction of NSPs by stage of disease are discussed in Sections 3.4.4 and 3.5.4, with detailed figures for HIV and HCV contained in Tables 3.4.5 and 3.5.5 respectively (See Appendix C).

Figures 4.2 and 4.3 illustrate the estimated number of HIV and HCV cases with and without NSPs and the number of cases avoided, until all cases avoided have died.

In both instances, the figures illustrate that the total number of cases avoided accumulates up to the end of 2000, the end of the NSP investment period, then progressively decline as they progress through the various disease stages and mortality takes effect. The difference in scales of the two figures should be noted, reflecting the higher prevalence of HCV among IDUs.

Figure 4.2 HIV cases with, without and avoided by NSPs

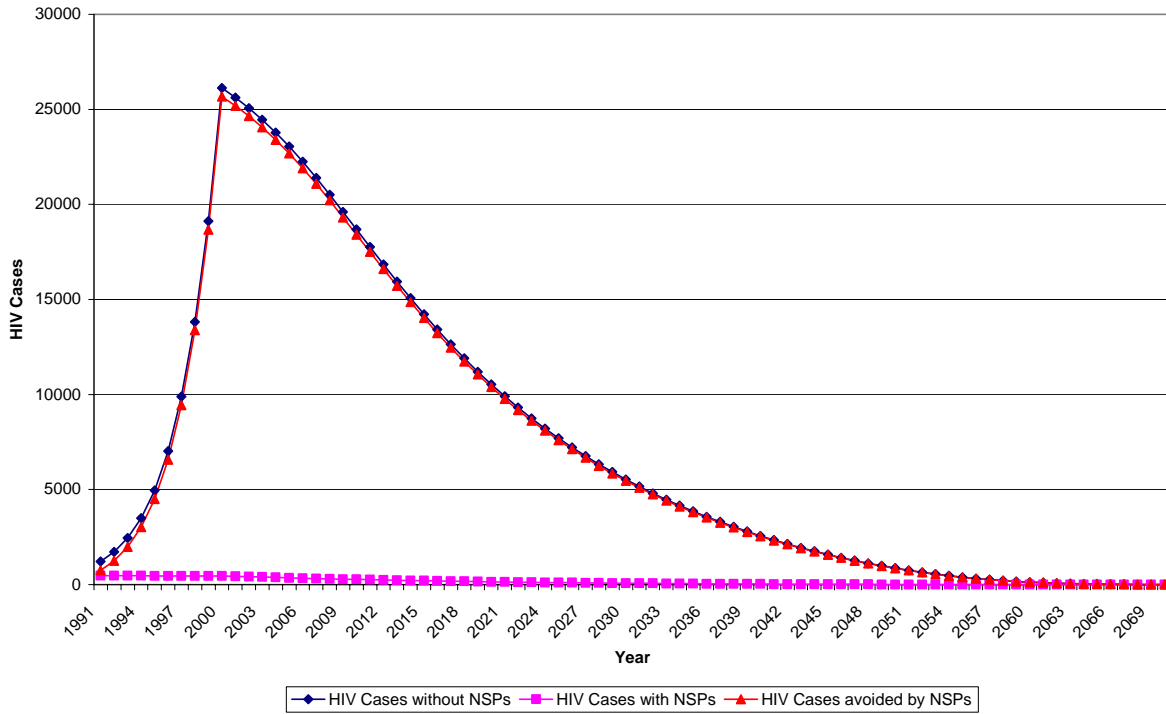

Figure 4.3 HCV cases with, without and avoided by NSPs

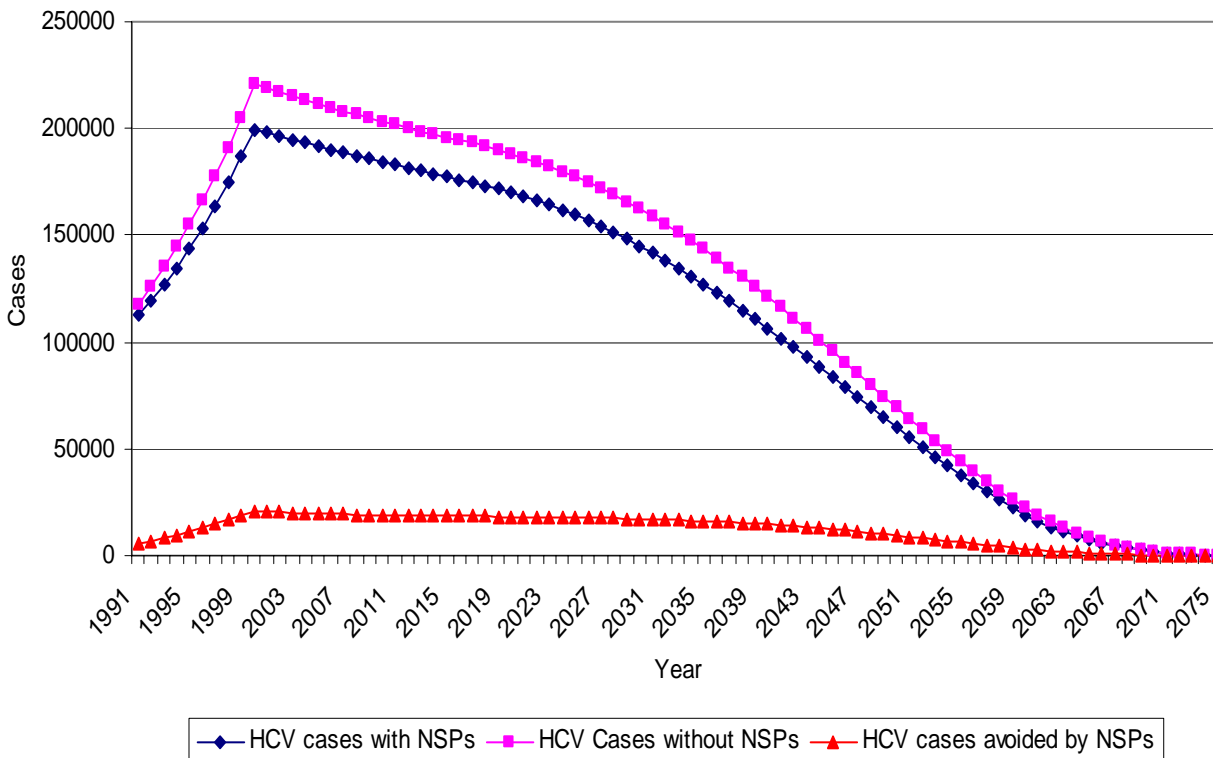

Figures 4.4 and 4.5 illustrate the stages of disease in HIV and HCV for the cases avoided by NSPs.

Figure 4.4 HIV cases avoided by stage of disease

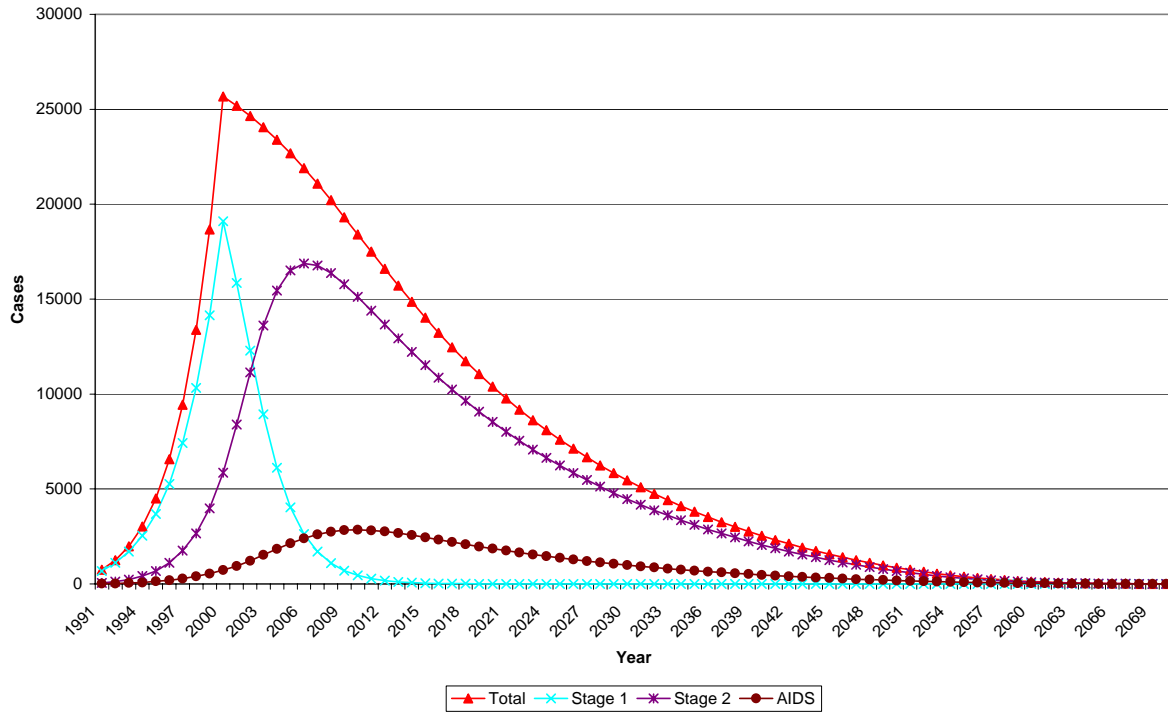

Figure 4.5 HCV cases avoided by stage of disease

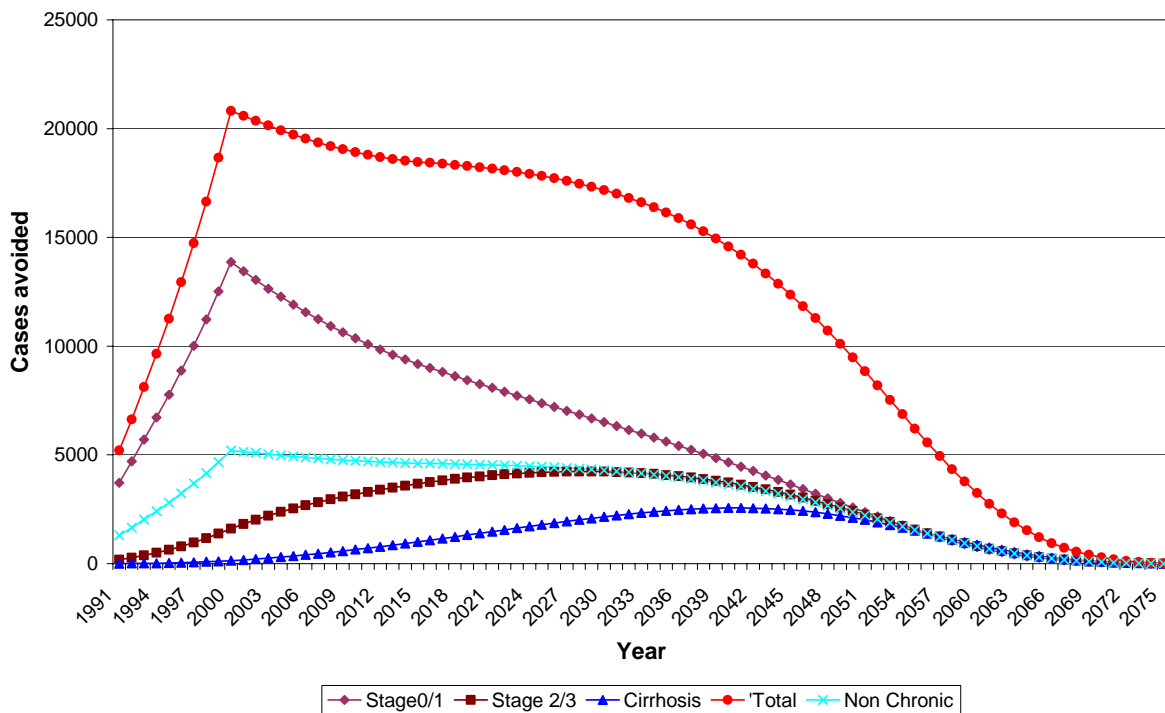



The figures illustrate the rate of progression of the two diseases, and the proportional distribution of the various stages of each disease over time, with later stages of the disease gaining greater prominence over time.

These data were applied in the economic model, with treatment costs included only for those patients diagnosed with the disease, as discussed in Sections 3.4 and 3.5. To the extent that some consumers not diagnosed with the disease also incur costs of treatment, the exclusion of these consumers from the model represents a conservative approach (i.e. the costs of treatment avoided may be understated).

#### 4.4 METHODOLOGY FOR HEALTH CARE COSTINGS FOR HIV

Initially, a review of national and international literature relating to quality of life assessment and health care for HIV/AIDS was undertaken. Additional information on health care utilisation for HIV/AIDS was sought from various databases and sources, including:

- The Australian HIV Observational Database - data on antiretroviral therapy uptake by risk group and stage of disease, and utilisation of specific HIV investigations (CD4 count and HIV viral load)
- The Highly Specialised Drugs Program - data on use and costs of antiretroviral therapy in Australia

The following assumptions were employed in determination of health care costs for HIV/AIDS:

- All people who acquire HIV infection are at risk of progression to advanced HIV disease.
- The health care costs of acute HIV are small, due to the often asymptomatic nature of newly acquired HIV infection, and therefore were not considered in the total costs.

##### 4.4.1 COSTS OF ANTIRETROVIRAL THERAPY

Data on antiretroviral therapy use and costs in Australia was obtained from the Highly Specialised Drug Scheme (NCHECR 2001). The per person cost of antiretroviral therapy increased significantly from 1996 (AUD\$4,385) to 1997 (AUD\$9,163) following the introduction of highly active antiretroviral therapy (HAART) (Table 4.4.1). Based on this data and a previous HIV/AIDS health care costing assessment in Australia (Hurley et al. 1995) we have estimated antiretroviral therapy per person costs to be AUD\$4,000 for the period 1990-1996 and AUD\$10,500 from 1997 (Table 4.4.2).

Table 4.4.1 Antiretroviral therapy expenditure in Australia, 1996-2000<sup>1</sup>

|                          | 1996         | 1997         | 1998         | 1999         | 2000         |
|--------------------------|--------------|--------------|--------------|--------------|--------------|
| Total patients           | 5,617        | 6,425        | 6,085        | 6,296        | 6,520        |
| Total costs (AUD\$)      | \$24,632,000 | \$58,876,000 | \$66,312,000 | \$67,689,000 | \$69,413,000 |
| Cost per patient (AUD\$) | \$4,385      | \$9,163      | \$10,897     | \$10,751     | \$10,646     |

1. Based on data available from the Highly Specialised Drug Scheme and the Australian HIV Observational Database (NCHECR 2001)

##### 4.4.2 COSTS OF OTHER HIV/AIDS MANAGEMENT

HIV/AIDS Treatment protocols and costs were partly based on the previous HIV/AIDS health care costing assessment in Australia (Hurley et al. 1995). In addition, information on CD4 count and HIV viral load utilisation was obtained from AHOD. Regarding hospitalisation costs (including treatment of complications), the following assumptions were made:

- Only people who have progressed to AIDS are hospitalised.

- Annual hospitalisation, diagnosis and complication treatment costs for people with AIDS prior to 1997 are based on Hurley et al (1995).
- Total hospitalisation, diagnosis and complication treatment costs for people with AIDS are similar in the periods 1990-1996 and from 1997.
- Survival for people with AIDS is approximately 18 months pre-1997 and 3 years from 1997, therefore annual costs for hospitalisation, diagnosis and complication treatment costs for people with AIDS will be reduced by 50% from 1997 (Table 4.4.2).

**Table 4.4.2 Treatment protocols and their costs for HIV disease**

| Disease stage and health care service costs                                                               | Costs                                                                      |
|-----------------------------------------------------------------------------------------------------------|----------------------------------------------------------------------------|
| <b>1. Early HIV disease<sup>1</sup></b>                                                                   |                                                                            |
| Doctor visits (specialist x 1, primary care x 3)                                                          | \$213                                                                      |
| HIV viral load testing x 3                                                                                | \$528                                                                      |
| CD4 count x 3                                                                                             | \$60                                                                       |
| Other laboratory services (full blood count x 3, biochemistry x 3, liver function tests x 3)              | \$169                                                                      |
| Antiretroviral therapy                                                                                    | \$4,000 (1990-1996) \$10,500 (from 1997)<br>for estimated 40% on treatment |
| <b>2. Progressive HIV disease<sup>1</sup></b>                                                             |                                                                            |
| Doctor visits (specialist x 2, primary care x 4)                                                          | \$295                                                                      |
| HIV viral load testing x 4                                                                                | \$704                                                                      |
| CD4 count x 4                                                                                             | \$80                                                                       |
| Other laboratory services (full blood count x 4, biochemistry x 4, liver function tests x 4)              | \$225                                                                      |
| Antiretroviral therapy                                                                                    | \$4,000 (1990-1996) \$10,500 (from 1997)<br>for estimated 70% on treatment |
| <b>3. AIDS<sup>2</sup></b>                                                                                |                                                                            |
| Doctor visits (specialist x 2, primary care x 4) <sup>1</sup>                                             | \$295                                                                      |
| HIV viral load testing x 4 <sup>1</sup>                                                                   | \$704                                                                      |
| CD4 count x 4 <sup>1</sup>                                                                                | \$80                                                                       |
| Other laboratory services (full blood count x 4, biochemistry x 4, liver function tests x 4) <sup>1</sup> | \$225                                                                      |
| Antiretroviral therapy                                                                                    | \$4,000 (1990-1996) \$10,500 (from 1997)<br>for estimated 90% on treatment |
| Diagnosis of HIV complications                                                                            | \$3,228 (1990-1996) \$1,614 (from 1997)                                    |
| Prophylaxis and management of opportunistic infections <sup>2</sup>                                       | \$15,132 (1990-1996) \$7,566 (from 1997)                                   |
| Hospital bed-days <sup>2</sup>                                                                            | \$50,328 (1990-1996) \$25,164 (from 1997)                                  |

<sup>1</sup> Health care services are per year per case in disease stage, based on CMBS Schedule Fee (2000).

<sup>2</sup> Cost estimates for AIDS (except antiretroviral therapy from 1997) are based on previous Australian figures from Hurley et al (1995), without adjustment for inflation.

The above annual costs of treatment of HIV by stage of disease were then converted to Year 2000 prices, where required, by application of the relevant CPI ratio. The annual costs of treatment by stage of disease were then applied to the number of survivors in each stage. Detailed figures of the results are provided in Table 4.4.3 (See Appendix D), with discussion presented in Section 4.6.

## 4.5 METHODOLOGY FOR HEALTH CARE COSTINGS FOR HCV INFECTION

The following assumptions were employed in determination of health care costs for hepatitis C:

- 75% of people who acquire HCV infection develop chronic hepatitis C.
- The health care costs of acute hepatitis C are small, due to the largely asymptomatic nature of newly acquired HCV infection, and therefore were not considered in the total costs.
- All people with chronic hepatitis C are at risk of progression to advanced liver disease complications.
- People can either remain in disease states or progress forward but not regress.

### 4.5.1 TREATMENT PROTOCOLS AND COSTS FOR HCV

Table 4.5.1 outlines treatment protocols for HCV and their cost estimates. Additional health care service items for stages 1-3, but for total period rather than per year are:

- Liver ultrasound x 2
- Liver biopsy x 2
- Pathology services (HIV serology x 1, HBV serology x 1, Iron studies x 1, full blood count x 4, alpha-1-antitrypsin level x 1, caeruloplasmin level x 1, ANA/auto-antibodies x 1, HCV genotype x 1, HCV viral load x 1)

These costs have been estimated at \$2,358 per case (Year 2000 prices)

Hospitalisation is assumed to only be required for:

- Liver biopsy (day only stay)
- Liver failure (incorporated into total cost estimate)
- Hepatocellular carcinoma (incorporated into total cost estimate)

Of the estimated 150,000 people living with chronic hepatitis C in Australia (Law 1999), less than 10% will have received combination therapy, the preferred treatment for hepatitis C, consisting of interferon and ribavirin. For this reason, and the assumption that the costs of combination therapy will have been balanced by some reduction in development of advanced liver disease complications, we have not costed combination therapy in the analysis.

**Table 4.5.1 Treatment protocols and their costs for HCV disease**

| Disease stage and health care services                                                                           | Costs |
|------------------------------------------------------------------------------------------------------------------|-------|
| <b>1. Mild chronic hepatitis C<sup>1</sup></b>                                                                   |       |
| Doctor visits (specialist x 1, primary care x 2)                                                                 | \$164 |
| Pathology services (liver function tests x 2)                                                                    | \$39  |
| <b>2. Moderate chronic hepatitis C<sup>1</sup></b>                                                               |       |
| Doctor visits (specialist x 1, primary care x 2)                                                                 | \$164 |
| Pathology services (liver function tests x 2)                                                                    | \$39  |
| <b>3. Compensated cirrhosis<sup>1</sup></b>                                                                      |       |
| Doctor visits (specialist x 2, primary care x 2)                                                                 | \$198 |
| Pathology services (liver function tests x 2, full blood count x 1, alpha-fetoprotein x 1, liver ultrasound x 1) | \$182 |

Table 4.5.1 (Cont) Treatment protocols and their costs for HCV disease

| Disease stage and health care services                 | Costs     |
|--------------------------------------------------------|-----------|
| <b>4. Liver failure<sup>2</sup></b>                    |           |
| Without transplant (80% of patients), cost per patient | \$164,340 |
| With transplant (20% of patients), cost of transplant  | \$75,000  |
| Expected cost per episode                              | \$146,472 |
| <b>5. Hepatocellular carcinoma<sup>2</sup></b>         |           |
| Without surgery (76% of patients), cost per patient    | \$117,895 |
| With surgery (33% of patients), cost per patient       | \$28,290  |
| Expected cost per episode                              | \$88,325  |

<sup>1</sup> Health care services are per year per case in disease stage, based on CMBS Schedule Fee (2000).

<sup>2</sup> Cost estimates are previous Australian figures from Shiell et al (1994), without adjustment for inflation.

## 4.6 HIV TREATMENT COSTS

The annual costs of treatment of HIV by stage of disease (Table 4.4.2) were converted to Year 2000 prices, where required, by application of the relevant CPI ratio. These were then applied to the number of survivors in each stage. Detailed figures of the results are provided in Table 4.4.3 (See Appendix D).

Figure 4.6 illustrates the annual costs of treatment for the diagnosed cases of HIV avoided as a result of the ten year investment in NSPs. Annual treatment costs rise progressively to the year 2008 as patients progress to later stages of the disease, at which time they peak at approximately \$269 million. Thereafter, annual costs decline, brought about mainly by the declining number of patients in the second and third stages of HIV.

Figure 4.6 Annual costs of treatment of diagnosed cases of HIV avoided by NSPs (Not discounted)

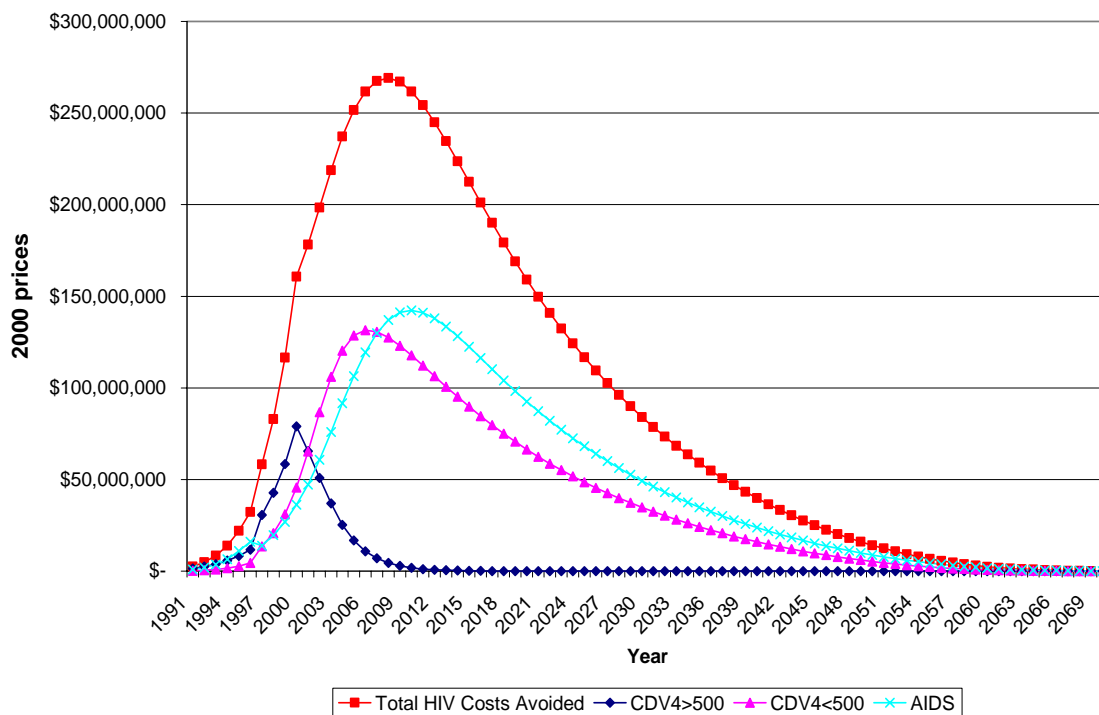

Cumulative HIV treatment costs avoided over the lifetime of consumers are illustrated in Figure 4.7. Costs accumulate throughout the lifetime of survivors, but at a slower rate after about 2008.

**Figure 4.7 Cumulative costs of treatment of diagnosed cases of HIV avoided by NSPs (Not discounted)**

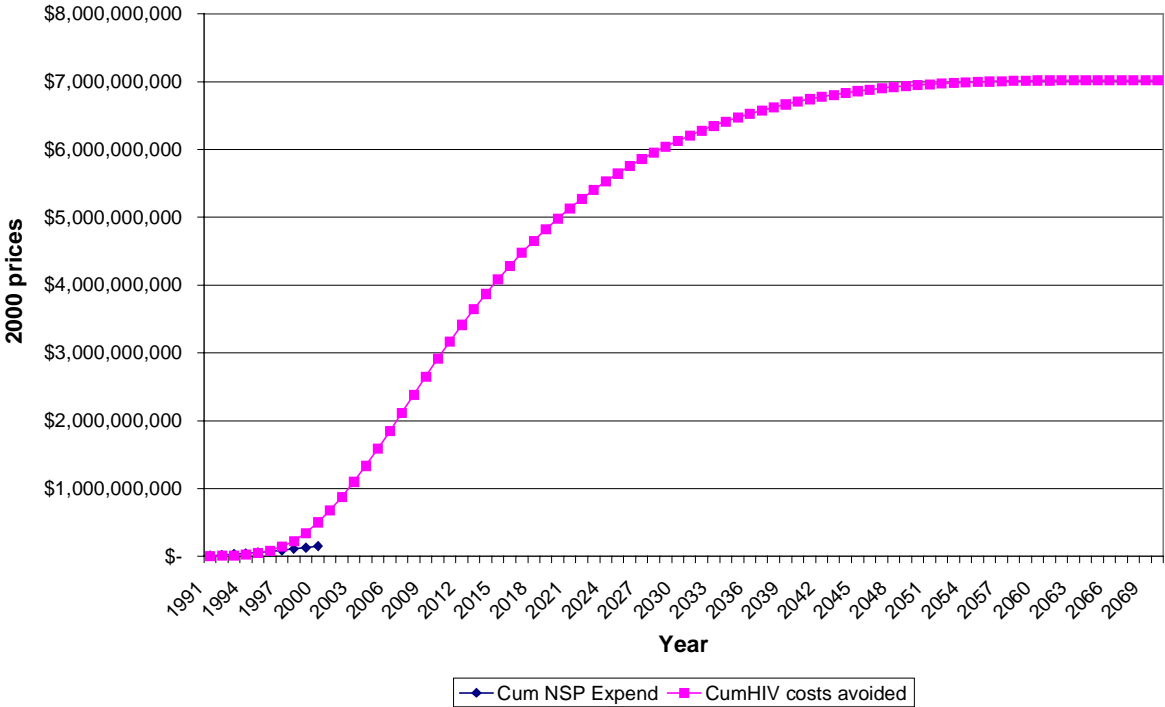

**4.6.1 HCV TREATMENT COSTS**

The annual costs of treatment of HCV by stage of disease (Table 4.5.1) were converted to Year 2000 prices, where required, by application of the relevant CPI ratio. These were then applied to the number of diagnosed survivors in each stage of the disease. Detailed figures of the results are provided in Table 4.4.3 (See Appendix D).

Figure 4.8 illustrates the annual costs of treatment for the diagnosed cases of HCV avoided as a result of the ten year investment in NSPs. Annual treatment costs rise progressively to the year 2040, at which time they peak at approximately \$18.8 million and decline thereafter. The major factor influencing this cost profile is the number of patients with liver failure who, while relatively small in number, have extremely high costs of treatment.

Cumulative costs of treatment of HCV are presented in Figure 4.9. Costs accumulate throughout the period as patients progress through stages of HCV, reaching a plateau in the late 2050s. The shapes of the curves for both annual and cumulative costs of HIV and HCV treatment are indicative of the different rates of progression through each disease, with progression in HCV occurring at a much slower rate than for HIV, and hence treatment for later stages of the disease peaking much later for HCV than for HIV. This deferral has implications for the determination of the Net Present Values of this expenditure, as discussed below.

Overall, total treatment costs avoided over the life of the cases of HIV and HCV avoided by NSPs are approximately \$7,808 million (before discounting). The costs of HIV treatment avoided are approximately ten times those for HCV, which reflects a combination of the number of cases avoided in the first instance (25,000 for HIV compared to 21,000 for HCV), a higher diagnosis rate for HIV than HCV, and higher average annual treatment costs for HIV than for HCV.

Figure 4.8 Annual costs of treatment of diagnosed cases of HCV avoided by NSPs (Not discounted)

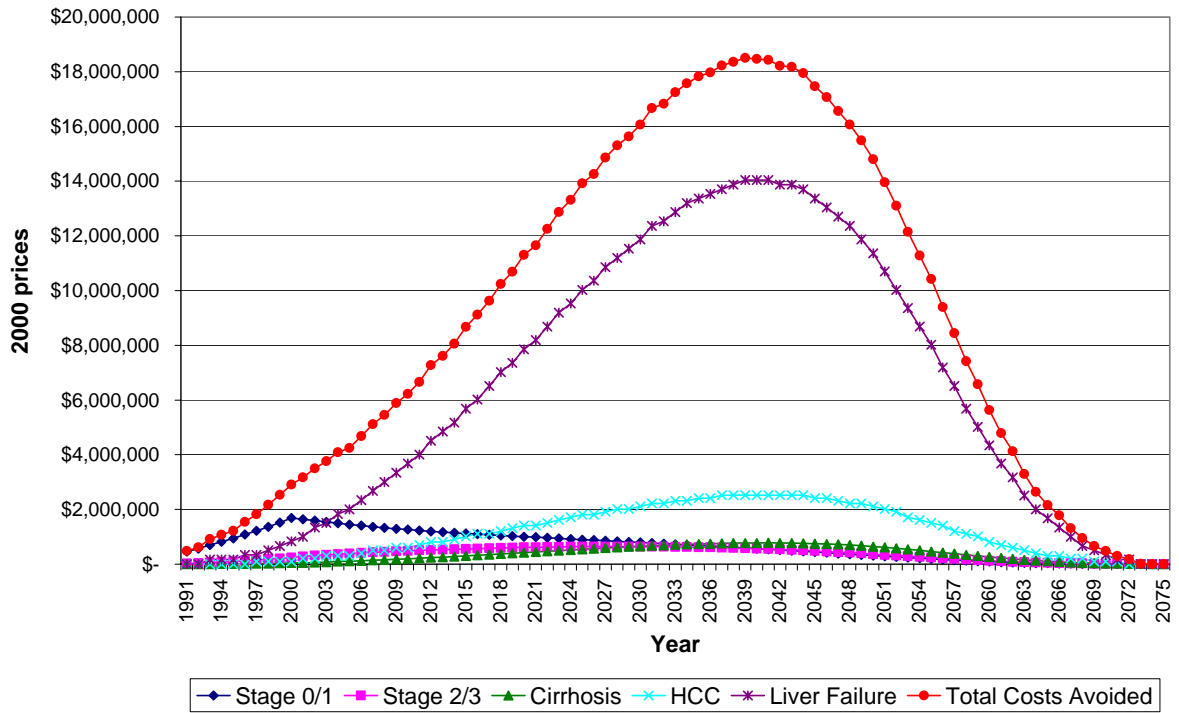

Figure 4.9 Cumulative costs of treatment of diagnosed cases of HCV avoided by NSPs (Not discounted)

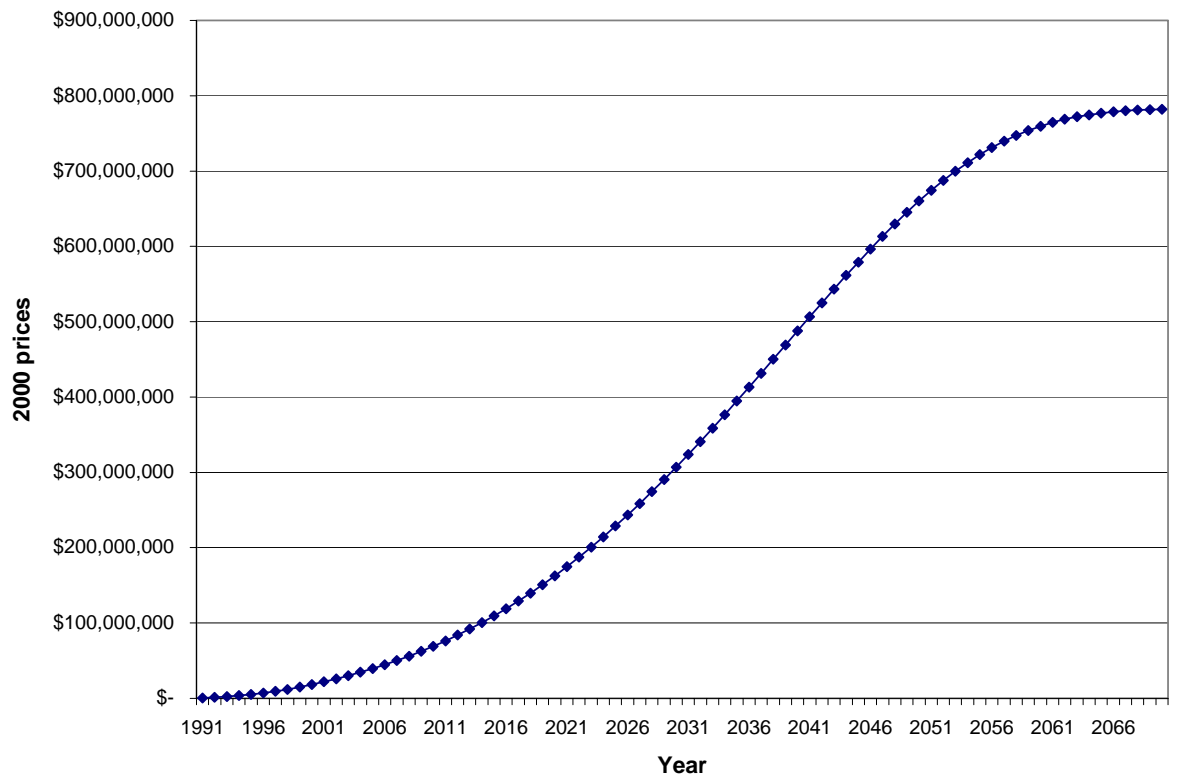

## 4.7 RETURN ON INVESTMENT

The calculation of the return on investment from NSPs takes into account the total investment by government and consumers in NSPs during the 1990s, together with anticipated savings resulting from treatment costs avoided for persons who would otherwise have contracted HIV and HCV over their lifetime, were it not for the availability of NSPs during the decade under study.

The calculation of return on investment discounts future cashflows associated with the investment in the NSP program and treatment costs avoided by an agreed discount rate. The discount rate most commonly used in government programs of this nature is 5% per annum. For the purposes of illustration, we have also applied discount rates of 3% and 0%.

When considering the return on investment, one of the questions to be considered is "Whose investment?" In this instance, expenditure on NSPs has been made by government and consumers. In our analysis, we have presented findings that illustrate both the return to government from its investment, as well as the return on total investment. We have also considered the return on investment over the lifetime costs of treatment of cases avoided, as well as the return achieved to the end of the investment period itself (Year 2000) ignoring any savings that accrue thereafter.

The impact of NSPs on both HIV and HCV has been considered in the analysis. Given the history of NSPs, their original purpose, and the stronger evidence base demonstrating their impact on the incidence of HIV among injecting drug users (see Section 3), our primary focus has been on HIV. Our initial analysis therefore considers the return on investment in NSPs from HIV avoidance alone. In the second part of the analysis, we consider what additional savings may have been derived from the avoidance of HCV among injecting drug users.

### 4.7.1 HIV IMPACTS

The results of the analysis on return on investment in NSPs to government and in total, having regard to the impacts on HIV alone, are presented in Table 4.7.1. Detailed tables are provided in Table 4.4.3 (See Appendix D).

**Table 4.7.1 Net Present Value of investment in NSPs for HIV.**

| Discount Rate                      | Net Present Value, 1991<br>(\$million, Year 2000 Prices) |                 |
|------------------------------------|----------------------------------------------------------|-----------------|
|                                    | Govt Expenditure                                         | All Expenditure |
| <b>Lifetime Costs of Treatment</b> |                                                          |                 |
| 5%                                 | \$2,277                                                  | \$2,262         |
| 3%                                 | \$3,415                                                  | \$3,398         |
| 0%                                 | \$6,896                                                  | \$6,876         |
| <b>To Year 2000</b>                |                                                          |                 |
| 5%                                 | \$242                                                    | \$227           |
| 3%                                 | \$287                                                    | \$270           |
| 0%                                 | \$373                                                    | \$353           |

The table illustrates that the net savings to government from its investment in NSPs over the lifetime of cases of HIV avoided (after deducting the value of the initial government investment) before discounting are \$6,896 million. Discounting these savings at 5% results in a Net Present Value (NPV) of their investment of \$2,277 million (\$3,415 million at 3% discount rate). When considering the total investment in NSPs (by including consumer

expenditure), the equivalent returns are \$6,876 million (undiscounted), \$2,262 million (discount rate of 5%) and \$3,398 million (discount rate of 3%).

To put these outcomes in perspective, they represent the savings that accrue from a combination of the following:

- A total investment of approximately \$150 million (Year 2000 prices) in NSPs during the 1990s, that resulted in
- approximately 25,000 cases of HIV avoided, who
- live for an average of about 24 years after infection, and who
- incur average treatment costs of nearly \$14,000 each year of their life after diagnosis.

Under these circumstances, the analysis indicates that there have been significant savings accruing to government from the investment in NSPs to date, and that these savings will continue to accrue into the future.

This is further illustrated by considering the return achieved to the end of the investment period (i.e. to Year 2000) without taking into account any additional savings that accrue in the future. This is also demonstrated in Table 4.7.1 where the NPV of the savings to the Year 2000 are shown, both to government and as a whole. By the year 2000, government had achieved net savings of \$373 million (after deducting the value of their investment), the NPV of which at a discount rate of 5% is \$242 million (\$287 million at a discount rate of 3%). The equivalent returns on the total investment in NSPs over the same period were \$353 million (undiscounted), \$227 million (discount rate of 5%) and \$270 million (discount rate of 3%)

**4.7.2 HIV AND HCV IMPACTS COMBINED**

In the second stage of the analysis, we consider the effects of NSPs on HIV and HCV combined. The return on investment in NSPs to government and in total, having regard to the impacts on HIV and HCV combined, are presented in Table 4.7.2. Detailed tables are provided in Table 4.4.3 (See Appendix D).

**Table 4.7.2 Net Present Value of investment in NSPs for HIV and HCV combined.**

| Discount Rate                      | Net Present Value, 1991<br>(\$million, Year 2000 Prices) |                 |
|------------------------------------|----------------------------------------------------------|-----------------|
|                                    | Govt Expenditure                                         | All Expenditure |
| <b>Lifetime Costs of Treatment</b> |                                                          |                 |
| 5%                                 | \$2,402                                                  | \$2,386         |
| 3%                                 | \$3,653                                                  | \$3,637         |
| 0%                                 | \$7,678                                                  | \$7,658         |
| <b>To Year 2000</b>                |                                                          |                 |
| 5%                                 | \$255                                                    | \$240           |
| 3%                                 | \$302                                                    | \$285           |
| 0%                                 | \$391                                                    | \$371           |

The table illustrates that the net savings to government from its investment in NSPs over the lifetime of cases of HIV and HCV avoided (after deducting the value of the initial government investment) before discounting are \$7,678 million. Discounting these savings at 5% results in a Net Present Value (NPV) of their investment of \$2,402 million (\$3,653 million at 3% discount rate). When considering the total investment in NSPs (by including consumer expenditure), the equivalent returns are \$7,658 million (undiscounted), \$2,386 million (discount rate of 5%) and \$3,637 million (discount rate of 3%).



The analysis indicates that the incorporation of HCV into the NPV calculations has further increased the savings accruing to government and in total. This is to be expected, as no additional investment has been required, and some 21,000 cases of HCV are estimated to have been avoided. The impact on savings, however, is significantly lower than for HIV, due to the lower annual costs of treatment for the earlier stages of HCV, and the fact that the higher costs associated with the relatively small proportion of patients who progress to liver failure are deferred until much later and are considerably reduced by discounting.

As noted in Section 4.5.1, we have not taken into account the costs of combination therapy for the treatment of HCV, due primarily to the small proportion of people with HCV receiving this treatment to date. Should this situation change and combination therapy become more widely prescribed, annual treatment costs are also expected to increase. Under these circumstances, the estimates of savings presented above are likely to underestimate the savings that would accrue under this treatment regime. This, of course, would also depend on the effect of combination therapy in slowing the rate of disease progression.

### 4.8 SENSITIVITY ANALYSIS

The analysis presented above has been based on the best estimates available for each of the key variables used in the economic model. In order to test the robustness of the results, sensitivity analysis has been conducted on a number of the variables affecting the outcomes. These are:

- Halving the rate of effect of NSPs on HIV. This analysis seeks to address the issue of the extent to which NSPs contribute to the reduction in HIV as opposed to other concomitant activities (see Section 3.1.7).
- Quartering the effect of NSPs on HIV. This analysis further extends the examination of reduced NSP effects on HIV.
- Doubling the level of investment in NSPs over the ten years. This analysis examines the result of increasing the expenditure on NSPs without any increase in effect on HIV. By so doing, it takes into account the potential contribution of the commercial pharmacy market.
- Halving the annual treatment costs for HIV. This analysis considers the results of possible future reductions in the costs of HIV treatment.

The outcomes for each of these variations in isolation are illustrated in Table 4.8.1, applied only to the impact on HIV, and based on a discount rate of 5% in all scenarios.

**Table 4.8.1 Net Present Value of investment in NSPs for HIV – Sensitivity Analysis.**

|                                    | Net Present Value, 1991<br>(\$million, Year 2000 Prices) |                 |
|------------------------------------|----------------------------------------------------------|-----------------|
|                                    | Govt Expenditure                                         | All Expenditure |
| <b>Lifetime Costs of Treatment</b> |                                                          |                 |
| Original Estimate                  | \$2,277                                                  | \$2,262         |
| Half NSP Effect on HIV             | \$333                                                    | \$318           |
| Quarter NSP Effect on HIV          | \$52                                                     | \$37            |
| Double NSP Investment              | \$2,180                                                  | \$2,151         |
| Half HIV Annual Treatment Costs    | \$1,090                                                  | \$1,075         |

The analysis indicates that the outcomes previously presented are most sensitive to the impact of NSPs on HIV incidence. This is to be expected because of the nature of the estimation technique employed, which uses the logit scale as its base. Consequently, halving the rate of effect of NSPs on HIV incidence has a proportionally

---

greater effect on the number of cases avoided over time. Nevertheless, even at the most conservative estimate of effect (one-quarter of the original effect estimate) the return on investment on both government expenditure and total expenditure on NSPs is positive. This also holds true for variations to the other input variables in the model. Of some interest is the fact that even when the annual costs of treatment for HIV are halved, NSPs continue to meet the required investment criteria. The sensitivity analysis indicates that the results presented are robust, and that the return on investment from NSPs is positive in all other tested scenarios.

## 4.9 DISCUSSION

The evaluation of the financial effect of NSPs on HIV and HCV has been based on:

- The reported operating and overhead costs of NSPs across Australia during the 1990s;
- Estimates of the number of cases of HIV and HCV avoided as a result of NSPs;
- Past and current treatment regimes and associated costs of treating HIV and HCV;
- Projections of future treatment costs based on the above; and
- The application of a Net Present Value (NPV) model to determine the return on investment to both government and in total for NSPs.

The analysis indicates that the return on investment will exceed manyfold the original investment in NSPs, and that the original investment had been fully recouped and surpassed by the end of the investment period, before any future savings are taken into account. The investment in NSPs is justified by the effect on HIV alone, with the effect on HCV providing an additional financial benefit, albeit a smaller one than HIV. Sensitivity analysis on the main variables used in the analysis indicates that the results are robust under a range of alternative assumptions and scenarios.

A number of observations are offered about the results presented.

- The factor that has the greatest impact in the financial analysis is the effect of NSPs in reducing the incidence of HIV (and to a lesser extent HCV). The evidence base for the estimation of effect has increased significantly since the earlier study by Hurley and Kaldor, with a greater number of sites now reporting data on HIV seroprevalence, which has been used in the analysis of effect presented in Section 3. As noted in Section 3.1.7, however, NSPs typically operate in an environment where a range of public health and other initiatives are in place. It is not possible to isolate the effects of NSPs from other elements in these initiatives. Indeed, it may be that NSPs are simply a “marker” for a range of activities whose combined effect is that demonstrated to date. Notwithstanding this point, the sensitivity analysis conducted indicates that even under scenarios where the effect of NSPs on HIV incidence is reduced by 75% of the original estimate, the return on investment from NSPs remains positive.
- The analysis of return on investment has considered only the direct costs and savings associated with NSPs. In particular, only direct health care savings relating to treatment costs of HIV and HCV have been incorporated into the analysis. There is clearly a greater range of other potential financial savings to be derived from a reduction in HIV and HCV, savings that would accrue to governments, patients and their carers as well as wider society. For example, savings to government and the community in terms of employment and unemployment, education and parenting costs are likely to be considerable. The exclusion of these savings from the analysis means that the case presented may understate, potentially significantly, the total financial benefits of NSP programs.
- Estimates of future treatment costs have been based on current treatment regimes and the costs associated with those regimes. As has been shown with the introduction of antiretroviral therapy for the treatment of HIV, methods and costs of treatment can change very quickly, which may have a significant effect on patients, as well the analysis of return on investment. The sensitivity analysis conducted on the results to date indicates that, even if future treatment costs halve, NSPs would continue to be a sound

---

investment strategy. However, any radical changes to treatment methods and their effect on disease progression and life expectancy may affect the outcomes presented.

- The analysis presented has considered the retrospective investment in NSPs, as well as the direct health care savings accrued to date and in the future associated with that investment, and assumes that the investment in NSPs ceases in the year 2000. Given the current population of injecting drug users and the level of use of NSP services, together with the demonstrated effect of NSPs on HIV and HCV, it is clear that an ongoing investment in NSPs will continue to avert the incidence of HIV and HCV, and that savings will continue to accrue. Consequently, the model demonstrates not only that the return on investment to date in NSPs has been positive, but also that ongoing investment in NSPs is warranted.

---

## 5 QUALITY OF LIFE (QoL) EFFECTS OF NSPs

### 5.1 INTRODUCTION

Since both HIV and HCV are potentially life-threatening conditions, one of the main benefits from averting infections is the prevention of premature mortality. However, there are considerable contrasts in the natural history of these two chronic viral infections, particularly in the rate of progression to advanced disease and related complications.

Prior to the introduction of improved antiretroviral therapy in the mid-1990s, a half of people with HIV would have developed advanced immunodeficiency and associated AIDS illness complications during the first 10 years of infection. Although a small proportion of people – possibly 5% – were considered long-term non-progressors the majority of the other half would have had evidence of immune function deterioration, and were at risk of progression to AIDS in subsequent years. Survival following development of AIDS was approximately 18 months. Thus, it was expected that very few people with HIV would have been alive or free of AIDS after 15-20 years infection. Although several pre-AIDS HIV conditions are associated with considerable morbidity, the major morbidity associated with HIV infection was as a result of the development of specific AIDS illnesses.

Since the introduction of highly active antiretroviral therapy (HAART), HIV disease progression has markedly slowed, both for people prior to and following development of AIDS illnesses. Morbidity and mortality associated with AIDS illnesses have declined by 50-80% in settings where access to HAART is widespread. On the other hand, there has been an increase in morbidity associated with side effects of therapy. This effect, however, is relatively modest when compared with prior AIDS illness-related morbidity. The sustainability of the effect of HAART on immune function, and longer-term therapeutic toxicity are two areas where there is some uncertainty regarding levels of morbidity and mortality that will be experienced by people with HIV in the next decade.

The natural history of HCV infection varies with HIV in many areas. First, a proportion of people – possibly 20-40% – do not develop chronic infection and are therefore not at risk of advanced liver disease complications. Second, progression to advanced disease is both slower than HIV and not inevitable. An estimated 20% of people with chronic hepatitis C will develop cirrhosis over 15-40 years and be at risk of liver failure and liver cancer. Although the remaining 80% will not develop morbidity associated with advanced liver disease complications, many people suffer considerable morbidity related to a range of relatively non-specific symptoms. These include chronic lethargy, abdominal discomfort, and headaches. There is also recent evidence that HCV may cause cognitive impairment including difficulties with concentration. Pre-advanced liver disease morbidity in chronic hepatitis C is unrelated to the extent of liver damage.

As with HIV, antiviral therapy for HCV has improved in recent years. Currently, 50% of people with chronic hepatitis C who commence standard of care antiviral therapy (interferon and ribavirin combination) develop a sustained response that equates to a probable cure of their infection. Antiviral therapy therefore has the potential to considerably reduce morbidity and mortality related to chronic hepatitis C, however, for several reasons uptake to date has been relatively limited.

HIV and HCV may also have psychosocial effects among infected persons, some of which may be associated with discrimination and social stigma. These will also impact on the person's quality of life, regardless of whether the disease progresses or not.

Given the above, it is likely that gains in quality of life are one of the major health benefits of the prevention of HIV and HCV infections.

## 5.2 QUALITY-ADJUSTED LIFE-YEARS (QALYS)

The most widely used approach for estimating quality of life benefits in economic evaluations is the quality-adjusted life-year (QALY). In this approach, states of health are assigned a health state preference or 'utility' value, on a scale including 1.0 (full health) and 0 (death). The amount of time an individual spends in a given health state is then multiplied by the health state preference value to calculate the quality-adjusted life-years (QALYs) gained.

The QALYs gained from a given health care intervention are estimated by considering the difference in progression, through the various health states, with and without the intervention concerned. This is shown schematically in Figure 5.1. Here the intervention leads to QALY gains both by increasing or maintaining quality of life and by extending life. The main advantage of the QALY approach is that it provides one combined measure of the benefits of a program that both extends life and maintains quality of life.

In the context of HIV or HCV, we might expect that the health state values for early stages of disease, such as early HIV (CD4 count above 500/mm<sup>3</sup>) or mild chronic hepatitis, are higher than those for the later stages of disease, such as AIDS or liver failure. Therefore, if the NSP reduces the probability of infection, or increases the average time to infection, we would expect fewer individuals in a cohort of IDUs to progress to the later stages of disease during their lifetime. Under the QALY approach this will lead to QALY gains.

Figure 5.1 Quality-adjusted life years

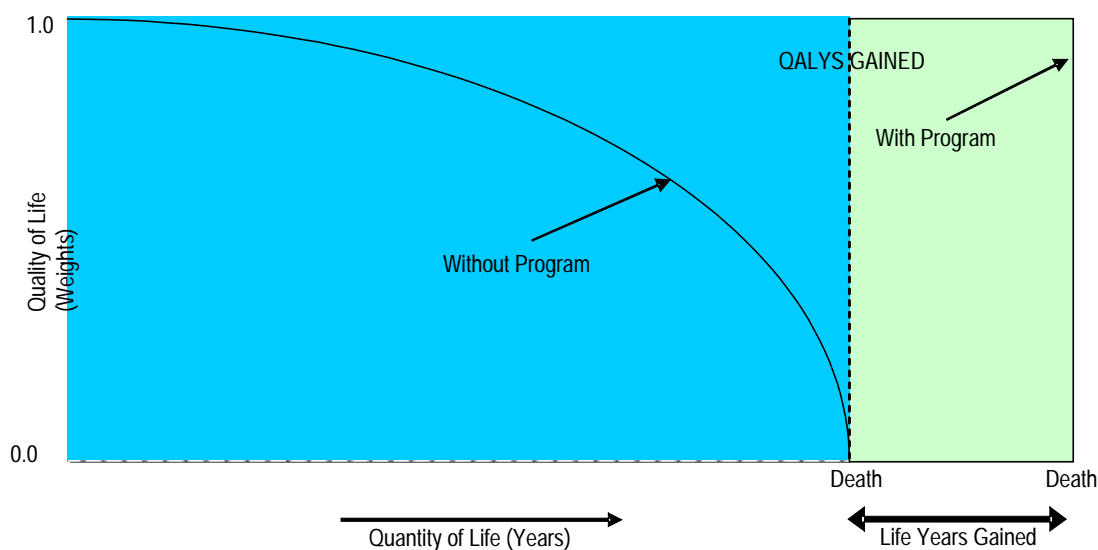

## 5.3 METHODOLOGY FOR ESTIMATING THE QALYS GAINED FROM THE PREVENTION OF HIV AND HCV INFECTIONS

In order to calculate the QALYs gained it is necessary to estimate the duration of time individuals will experience particular health states and the 'utility' values for those states. The durations of time spent in particular health states for someone with HIV or HCV has been estimated from the epidemiological literature and Australian data. These have been incorporated into the calculation of the number of cases prevented by stage of disease and the projections of survivors beyond 2000, as outlined in Section 3, and presented in Tables 3.4.5 and 3.5.5 in Appendix C.

Health state preference values for the disease stages are not readily available. One approach would be to undertake a free-standing study to estimate the values by standard gamble or time trade-off (Drummond, et al, 1997). However, this approach was considered beyond the scope of the current project.

Rather, it was decided to use values for health states existing in the literature. For example, Tengs et al (2000) report more than 1,000 health state values, many of which relate to HIV or HCV. In addition, there have been some papers published specifically relating to HIV (Holtgrave and Pinkerton, 1997) and HCV (Bennett, et al, 1997)

### 5.3.1 QALY VALUES FOR HIV

The quality of life estimates for HIV have been based on a review updating costs of HIV illness and quality of life estimates since the introduction of combination antiretroviral therapy (Holtgrave & Pinkerton 1997). Their estimates were based on an extensive review of studies, in which HIV-infected patients formed the study population of almost all identified studies. There are some differences in the disease phases they used and those we have employed. We have divided the undiagnosed HIV phase into two, one with “early HIV disease” and one with “progressive HIV disease”. In Holtgrave & Pinkerton (1997) all people with undiagnosed HIV were given a quality of life rating of 0.94. We have assumed that people with “progressive HIV disease” who remain undiagnosed would in general have a slightly lower quality of life rating than those with earlier HIV disease. We have assumed that all people with AIDS are diagnosed.

Definitions for disease states and associated quality of life adjustments for HIV are presented in Table 5.3.1:

**Table 5.3.1 Quality of life values by disease stage of HIV**

| Disease Stage                          | Description                                                                                                     | QALY Value |
|----------------------------------------|-----------------------------------------------------------------------------------------------------------------|------------|
| Early HIV Disease – Undiagnosed.       | HIV infection with CD4 count above 500/mm <sup>3</sup> , unaware of HIV serostatus.                             | 0.94       |
| Early HIV Disease – Diagnosed.         | HIV infection with CD4 count above 500/mm <sup>3</sup> , aware of HIV serostatus and no antiretroviral therapy. | 0.87       |
| Progressive HIV Disease – Undiagnosed. | HIV infection with CD4 count below 500/mm <sup>3</sup> , unaware of HIV serostatus.                             | 0.90       |
| Progressive HIV disease – Diagnosed.   | HIV infection with CD4 count nadir below 500/mm <sup>3</sup> and commenced on antiretroviral therapy.           | 0.76       |
| AIDS                                   | AIDS as defined by clinical condition.                                                                          | 0.62       |

### 5.3.2 QALY VALUES FOR HCV

Quality of life adjustments for HCV were partly based on previous published estimates from a panel of hepatologists (Bennett et al. 1997). However, recent evidence from quality of life assessments among patient assessments was used to adjust the ratings provided by Bennett et al (1997). For example, studies indicate no significant difference in quality of life based on either degree of hepatic inflammation (as measured by ALT/AST) or extent of hepatic fibrosis (Bonkovsky et al. 1999). Therefore, we have used the same quality of life adjustment for diagnosed mild and moderate chronic hepatitis. Undiagnosed categories have higher quality of life estimates for two reasons. Firstly, development of symptomatic disease may often be a reason for HCV testing. Secondly, recent evidence suggests that quality of life impairment increases following diagnosis of hepatitis C (Rodger et al. 1999). We have combined the quality of life adjustments from Bennett et al (1997) for ascities (0.35), variceal haemorrhage (0.28), and hepatic encephalopathy (0.30), to produce a category for liver failure (0.32). We have assumed that all people with liver failure and HCC are aware of their HCV status. For the 25% of HCV infections that do not progress to chronic hepatitis, we have allocated a quality of life value of 1.0. This is a conservative estimate, as many people with hepatitis C who have not progressed to chronic infection are unaware of their non-viraemic status and may suffer significant impairment in quality of life related to psychosocial mechanisms.

Definitions for disease states and associated quality of life adjustments for HCV are presented in Table 5.3.2:

**Table 5.3.2 Quality of life values by disease stage of HCV**

| Disease Stage                                    | Description                                                                                                                               | QoL Value |
|--------------------------------------------------|-------------------------------------------------------------------------------------------------------------------------------------------|-----------|
| HCV antibody positive – non-chronic hepatitis C. | HCV infected but does not progress to chronic hepatitis.                                                                                  | 1.00      |
| Mild chronic hepatitis – Undiagnosed             | Chronic hepatitis C, unaware of HCV status, with stage 0-1 (no-minimal) hepatic fibrosis.                                                 | 0.94      |
| Mild chronic hepatitis – Diagnosed.              | Chronic hepatitis C, aware of HCV status, with stage 0-1 (no-minimal) hepatic fibrosis.                                                   | 0.82      |
| Moderate chronic hepatitis – Undiagnosed.        | Chronic hepatitis C, unaware of HCV status, with stage 2-3 (moderate-severe) hepatic fibrosis.                                            | 0.94      |
| Moderate chronic hepatitis – Diagnosed.          | Chronic hepatitis C, aware of HCV status, with stage 2-3 (moderate-severe) hepatic fibrosis.                                              | 0.82      |
| Compensated cirrhosis – Undiagnosed              | Chronic hepatitis C, unaware of HCV status, with associated cirrhosis but no evidence of liver failure or hepatocellular carcinoma (HCC). | 0.84      |
| Compensated cirrhosis – Diagnosed                | Chronic hepatitis C, aware of HCV status, with associated cirrhosis but no evidence of liver failure or hepatocellular carcinoma (HCC).   | 0.74      |
| Liver failure                                    | Chronic hepatitis C associated cirrhosis that has progressed to de-compensation.                                                          | 0.32      |
| Hepatocellular Carcinoma (HCC)                   | Chronic hepatitis C associated cirrhosis that has progressed to HCC.                                                                      | 0.10      |

### 5.3.3 ADDITIONAL ELEMENTS OF THE QALY CALCULATIONS

Although somewhat more controversial than discounting costs, it is conventional to discount QALYs by the same rate. This has the effect of slightly reducing the estimate of the total QALYs gained from NSPs, as many of the QALYs are gained in the future.

## 5.4 NUMBER OF CASES OF HIV AND HCV AVOIDED

The estimates of the number of cases of HIV and HCV avoided as a result of the availability of NSPs during the 1990s are detailed in Section 3, and in Tables 3.4.5 and 3.5.5 in Appendix C. The outcomes have also been illustrated previously in Figures 4.2 and 4.3.

In summary, approximately 25,000 cases of HIV infection and 21,000 cases of HCV infection are estimated to have been avoided as result of NSP activities during the 1990s. Of those with HCV infection, approximately 16,000 persons would develop chronic hepatitis C. By the year 2010, some 4,500 deaths from HIV are estimated as being avoided, approximately 650 fewer people would be living with cirrhosis and 90 HCV-related deaths would have been prevented.

## 5.5 NUMBER OF LIFE YEARS GAINED

The number of life years gained provides a measure of the additional number of years by those persons who would otherwise have been infected with HIV and HCV, but for the effect of NSPs. This is estimated by deducting the number of life years they would have lived with HIV or HCV from the number of years they are expected to live without the disease. The results are indicative of the effect of the mortality rate for HIV/HCV on the target population, compared to that for the same population without these diseases.

The effect of NSPs on HIV and HCV is illustrated in Figures 5.2 and 5.3, with detailed tables provided in Table 5.5.1 (See Appendix E).

Figure 5.2 Life Years Gained for HIV cases avoided

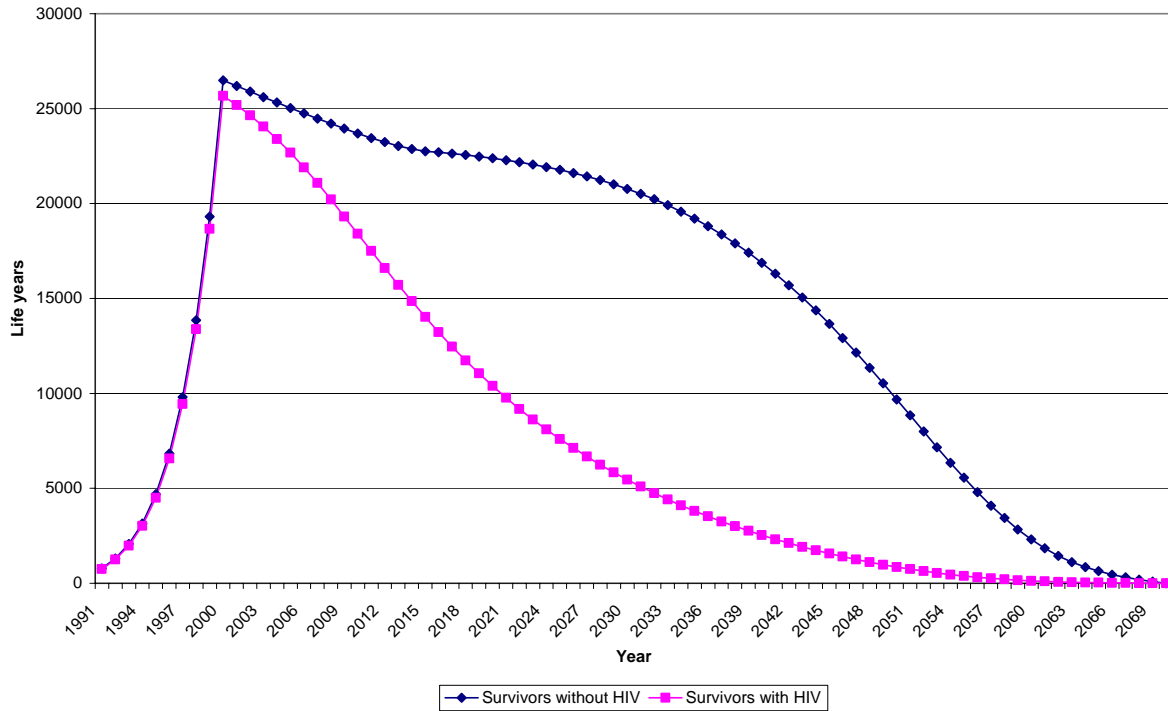

Figure 5.3 Life Years Gained for HCV cases avoided

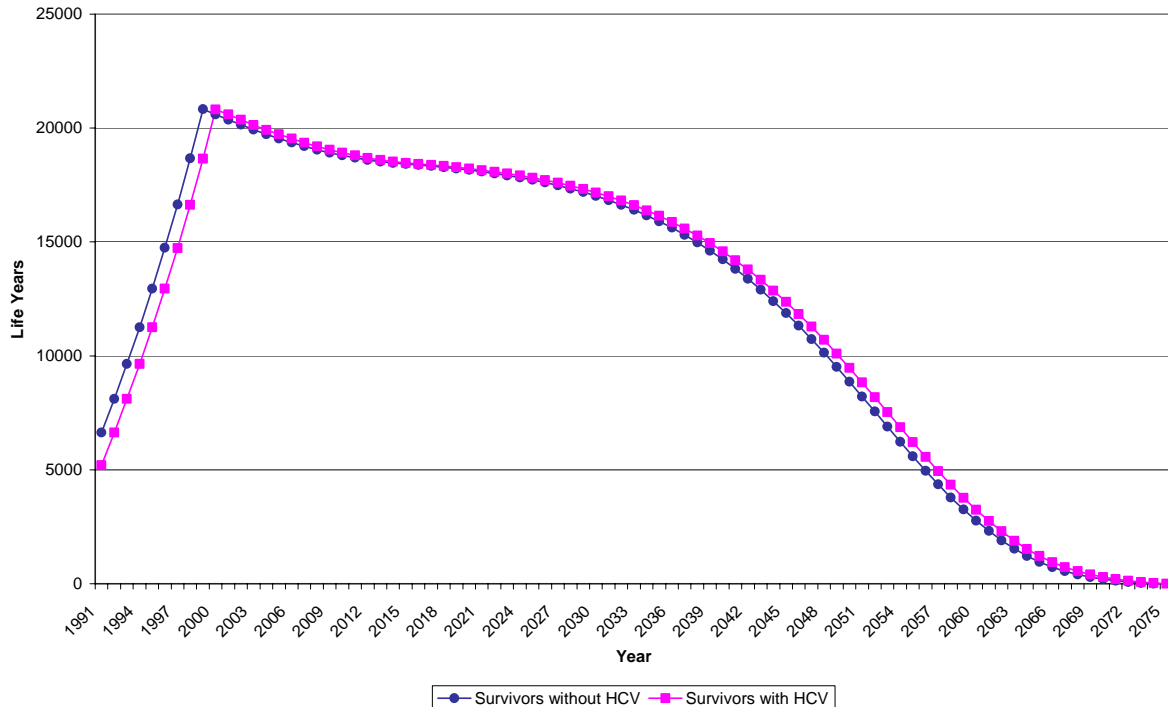

In the figures, the gap between the curves "Survivors without HIV/HCV" and "Survivors with HIV/HCV" represents the number of life years saved over the lifetime of those affected. As is evident from both the figures and the tables, the effect of NSPs in terms of life years saved is much greater for HIV than for HCV. The 25,000 persons avoiding HIV are expected to gain an additional 588,000 life years (about 23 years each) than if they had contracted HIV. In comparison, the 21,000 persons avoiding HCV are expected to gain only about 1,200 life years



over their lifetime. The difference in these outcomes is essentially due to the different mortality rates associated with each disease and their rate of progression through the various stages, both of which have been incorporated into the analysis.

### 5.6 QUALITY ADJUSTED LIFE YEARS GAINED

The preceding analysis of life years gained takes into account the mortality effect of HIV and HCV on persons within the target population, namely injecting drug users. However, this analysis does not take into account any differences in the quality of life for those with HIV or HCV compared to those without the disease. As discussed in Section 5.2, the application of an adjustment factor to take account of the quality of life effects of these diseases leads to a measure referred to as Quality Adjusted Life Years (QALYs). Comparing this measure to the number of life years that the affected population lives in a disease-free state (i.e. by avoiding HIV and HCV) provides a measure of the QALYs gained as a result of NSPs. QALYs gained therefore incorporate both the quantity of life gained, and the quality of life gained by avoiding HIV and HCV.

The outcomes of this analysis are presented in Table 5.5.1 (See Appendix E) and in Figures 5.4 to 5.7.

Figure 5.4 Life Years and QALYs gained by HIV survivors

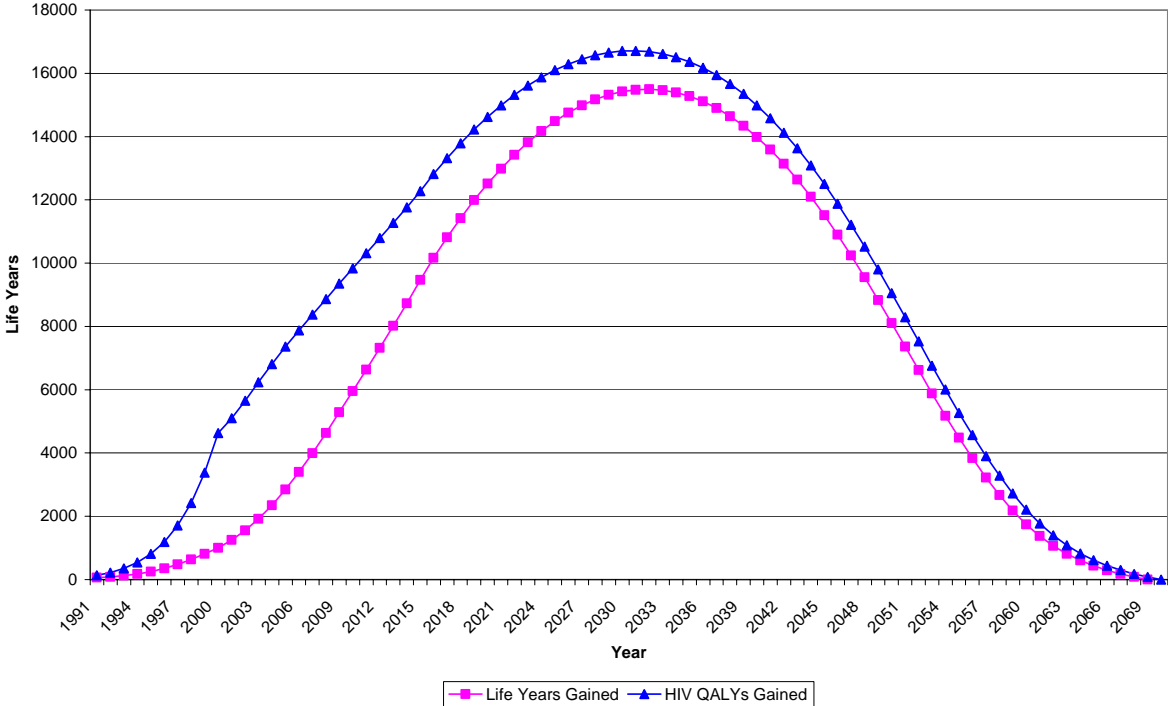

Figure 5.5 Life Years and QALYs gained by HCV survivors

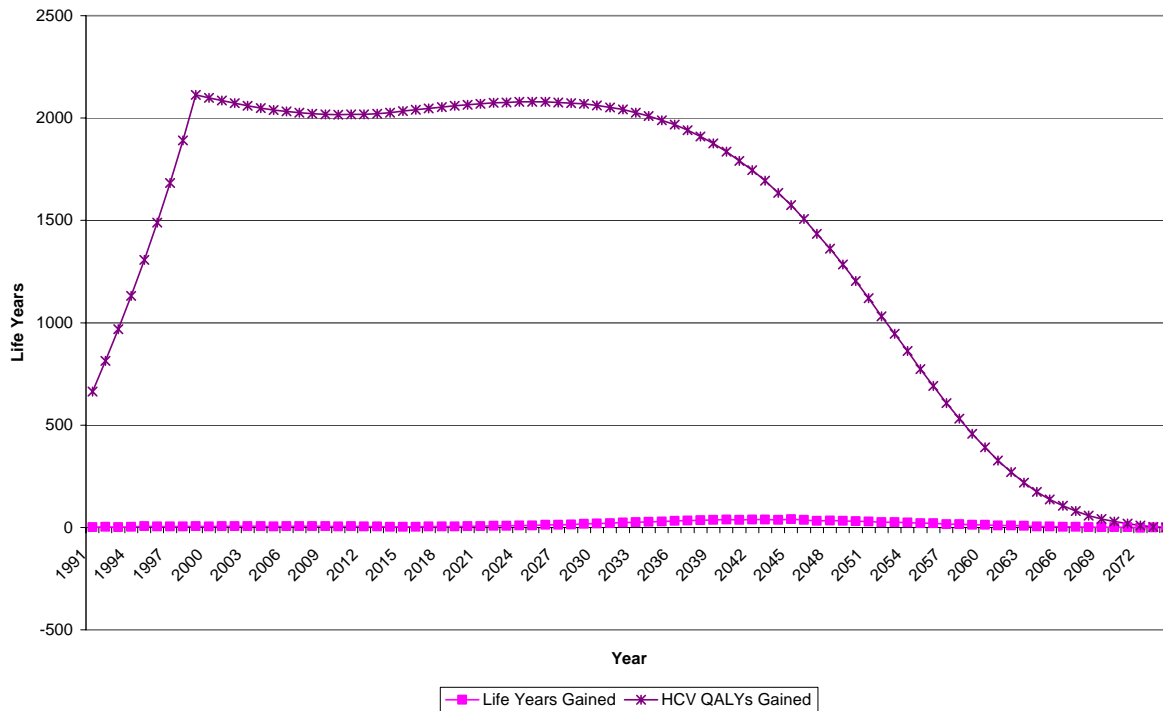

In figures 5.4 and 5.5 the curves “HIV/HCV QALYs Gained” represent the quality adjusted life years for persons who would have had HIV/HCV, but for the effect of NSPs. The gap between these curves and the curves “Life Years Gained” represents the quality effect of HIV and HCV on their lives. The 25,000 persons avoiding HIV are expected to gain an additional 715,000 quality adjusted life years than if they had contracted the disease. In comparison, the 21,000 persons avoiding HCV are expected to gain about 120,000 quality adjusted life years over their lifetime. The difference between the two groups is largely attributable to the greater effect of HIV on the “quantity” of life compared to HCV, rather than the “quality” effect.

In the case of HIV, the number of life years gained each year increases up to the year 2033, and thereafter continues at a progressively slower rate. The curve for QALYs gained generally follows a similar pattern, reflecting the dominant effect of the “quantity” component.

In contrast, the number of life years gained for persons avoiding HCV is relatively small. However, when considering the effect of HCV on the quality of life, considerable gains are evident. These gains are relatively constant up to the year 2035, then decline each year to death.

Figures 5.6 and 5.7 illustrate the cumulative number of life years and QALYs gained by avoiding HIV and HCV. The shape of the curves “Life Years Gained” illustrates the progressive effect of the different mortality rates and is considerably steeper for HIV than for HCV. The increasing gap between “Life Years Gained” and “QALYs Gained”, and the timing of its emergence, illustrates the differences in quality of life effect between the two diseases.

Figure 5.6 Cumulative Life Years and QALYs gained by HIV survivors

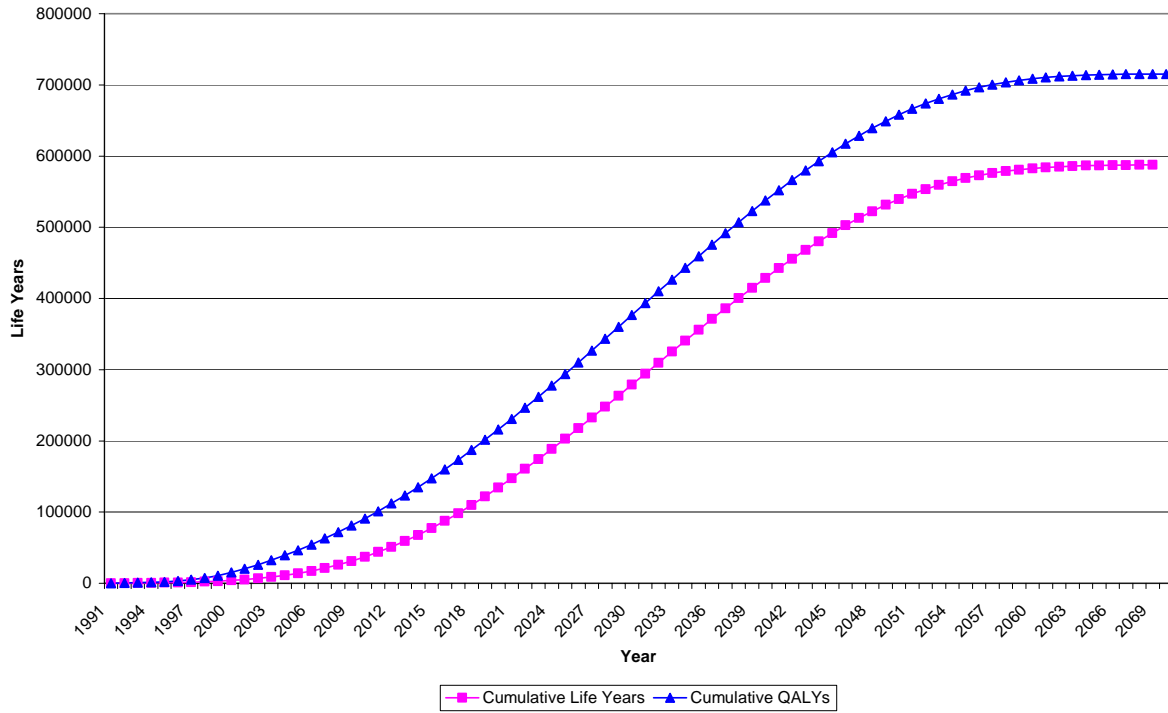

Figure 5.7 Cumulative Life Years and QALYs gained by HCV survivors

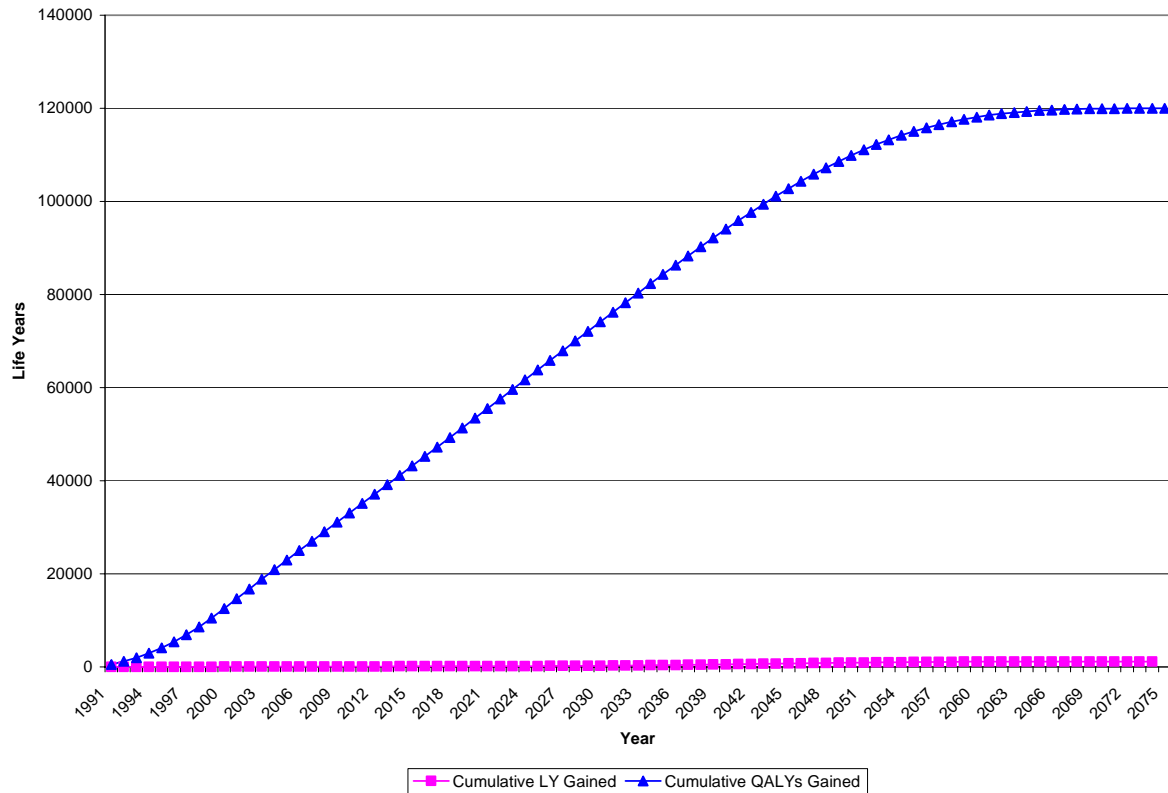

As previously noted, it is not uncommon to discount QALYs gained in the future in the same way as we have discounted future financial benefits. This approach is based on the principle that an improvement in the quality of

life is likely to be valued more if it occurs earlier than if it occurs later in life, just as a dollar gained earlier is likely to be valued more than a dollar gained later.

Applying the same discount rates used in the financial analysis (viz 5%, 3% and 0%) to QALYs gained results in the figures shown in Table 5.6.1

**Table 5.6.1 Net Present Value of QALYs gained for HIV and HCV**

| Discount Rate | Net Present Value, 1991 (QALYs) |         |           |
|---------------|---------------------------------|---------|-----------|
|               | HIV                             | HCV     | HIV & HCV |
| 5%            | 138,072                         | 32,207  | 170,279   |
| 3%            | 248,364                         | 50,041  | 298,406   |
| 0%            | 715,245                         | 119,992 | 835,237   |

A total of approximately 715,000 QALYs were gained by the avoidance of HIV, the present value of which, at a discount rate of 5%, is 138,000 QALYs (248,000 at a 3% discount rate). The equivalent gains for HCV are 120,000 QALYs over their lifetime, the present value of which (discounted at 5%) is 32,000 QALYs (50,000 at 3%). Discounting has the effect of reducing the present value of gains made in later years relative to those made in earlier years. Consequently, the ratio of the present value of QALYs gained to total QALYs gained for HIV (i.e. 138,072/715,245) is lower than that for HCV (i.e. 32,207/119,992), reflecting the fact that HCV makes a higher proportion of its QALY gains in the earlier years compared to HIV.

## 5.7 SENSITIVITY ANALYSIS

The QALY adjustment factors used in the analysis of effect of NSPs on the quality of life of injecting drug users have been based on estimates from the literature, as described in Section 5.3.1.

In order to test the effect of different QALY factors on the outcomes demonstrated to date, we have conducted sensitivity analysis by increasing the QALY adjustment factor by 5% across all stages of both HIV and HCV. Such an increase could come about with improved methods of treating each disease, which, while perhaps not altering the rate of disease progression or mortality, improve the quality of life in each stage. The effect of this approach is essentially to reduce the QALYs saved by NSPs, as those who might otherwise be infected by HIV or HCV would enjoy a higher quality of life than under our original assumptions.

The alternative QALY values are shown in Table 5.7.1, and the effects of the application of these values shown in Table 5.7.2.

**Table 5.7.1 Alternative quality of life values by disease stage of HIV and HCV**

| HIV                                    |            | HCV                                              |            |
|----------------------------------------|------------|--------------------------------------------------|------------|
| Disease Stage                          | QALY Value | Disease Stage                                    | QALY Value |
| Early HIV Disease – Undiagnosed.       | 0.987      | HCV antibody positive – non-chronic hepatitis C. | 1.000      |
| Early HIV Disease – Diagnosed.         | 0.9135     | Mild chronic hepatitis – Undiagnosed.            | 0.987      |
| Progressive HIV Disease – Undiagnosed. | 0.945      | Mild chronic hepatitis – Diagnosed.              | 0.861      |

| HIV                                  |            | HCV                                       |            |
|--------------------------------------|------------|-------------------------------------------|------------|
| Disease Stage                        | QALY Value | Disease Stage                             | QALY Value |
| Progressive HIV disease – Diagnosed. | 0.798      | Moderate chronic hepatitis – Undiagnosed. | 0.987      |
| AIDS                                 | 0.651      | Moderate chronic hepatitis – Diagnosed.   | 0.861      |
|                                      |            | Compensated cirrhosis – Undiagnosed.      | 0.882      |
|                                      |            | Compensated cirrhosis – Diagnosed.        | 0.777      |
|                                      |            | Liver failure.                            | 0.336      |
|                                      |            | Hepatocellular Carcinoma (HCC).           | 0.105      |

**Table 5.7.2 Net Present Value of QALYs gained for HIV and HCV, alternative QALY values**

| Discount Rate | Net Present Value, 1991 (QALYs) |        |           |
|---------------|---------------------------------|--------|-----------|
|               | HIV                             | HCV    | HIV & HCV |
| 5%            | 129,151                         | 22,603 | 151,754   |
| 3%            | 235,943                         | 35,528 | 271,471   |
| 0%            | 692,880                         | 87,118 | 779,998   |

The effect of increasing the quality of life adjustment factor for HIV and HCV is to raise the total number of QALYs for people with these diseases, and hence to reduce the QALY gains made by avoiding them. It should be noted that the effect on HCV, however, is greater than that for HIV. This reflects the fact that the major component of the QALY gains made in HIV is derived from an improvement in the quantity of life saved, whereas HCV QALY gains are made up almost entirely of quality of life effects.

In both instances, the gains made in terms of quality of life effects of NSPs in HIV and HCV remain considerable, and reinforce the importance of this aspect of their effect.

## 5.8 DISCUSSION

The analysis of the effects of HIV and HCV on both the quantity of life and the quality of life of persons with these diseases adds a further dimension to the assessment of the effect of NSPs among injecting drug users. As demonstrated in Section 4, the investment in NSPs to date has been shown to be financially beneficial, and satisfies current government investment criteria on financial grounds alone. Any benefits to consumers in terms of the number of lives saved, the number of life years gained, and the improved quality of life are therefore additional to the direct financial benefits to governments previously identified.

Our analysis demonstrates that NSPs have contributed significantly to:

- The number of cases of HIV and HCV avoided;
- A reduction in the number of deaths from HIV, and to a lesser extent from HCV;
- An increase in the number of life years among injecting drug users, particularly from the avoidance of HIV; and
- An improvement in the quality of life among injecting drug users who would otherwise have contracted HIV or HCV.

Each of these outcomes should be considered over and above the direct financial benefits achieved from the investment in NSPs. It is clear that if we were to place a monetary value against any of these outcomes, the financial gains already demonstrated would be significantly increased.

---

## **APPENDIX A**

### **OVERVIEW OF STATE AND TERRITORY NEEDLE AND SYRINGE PROGRAMS**

---

# AUSTRALIAN CAPITAL TERRITORY

## SNAPSHOT

|                                    |                           |
|------------------------------------|---------------------------|
| No of NSPs:                        | 35 (including pharmacies) |
| Syringes distributed in 1999-2000: | 593,000                   |
| Approximate Cost:                  | \$539,000                 |

## HISTORY AND PROGRAM FRAMEWORK

Needle and Syringe Programs have been operational in the ACT since 1989. The Drugs of Dependence Act 1989 was amended to provide for the licensing of three occupational groupings (doctors, nurses and pharmacists) plus individuals who had successfully completed an authorised training program and who were accredited by the Chief Health Officer. The training program is currently conducted by Assisting Drug Dependence Inc (ADDInc) with funding from ACT Department of Health and Community Care. ADDInc is also contracted to coordinate all other services associated with the operation of NSPs including supply, distribution and returns.

## TYPES OF PROGRAMS

As at June 2001, there were 35 NSPs operating in the ACT consisting of:

- 2 primary outlets (ADDInc and Canberra Injectors Network);
- 11 secondary outlets such as government funded health services like community health centres and non Government services; and
- 22 pharmacy based programs.

There is usually a small outreach service provided for sex workers, but this is not operational at this time. The pharmacy program is relatively new, having been established with the assistance of COAG funds some 12 months ago. A person has been employed at ADDInc to coordinate the development and growth of the pharmacy program. Except for this paid position, the program is largely self-funded.

Pharmacy packs (consisting of 4 syringes, 4 ampoules of water, swabs, spoons and a disposal unit) are provided to the pharmacy at a cost of \$2 and sold to customers for \$4. All pharmacies in the program (along with all other NSP sites in the ACT) provide disposal facilities. However, there is no discount for people who return packs to pharmacies (as is the case in some jurisdictions).

The primary and secondary outlets provide a different type of kit consisting of syringes, water ampoules, swabs, spoons, cotton wool and a disposal unit. All of this equipment is available to users without charge. They also have available other forms of injecting paraphernalia such as butterfly clips and wide bore syringes, some of which is sold at cost recovery rates. The primary outlets provide the full range of ancillary services including information, education, referral, disposal and condoms.

The ACT has a comprehensive needle and syringe disposal strategy. As noted above, all NSPs (including pharmacies) have disposal facilities. This is supported by the following strategies (largely funded by the Department of Urban Services):

- sharps disposal facilities in every public toilet in the ACT;
- a Sharps hotline – a city ranger collects disposed syringes from public land and from private citizens who find a syringe on their land. Businesses are expected to pay for disposal costs;
- training for individuals (such as cleaners) on how to collect and dispose of syringes safely;

- 
- a depot for bulk waste; and
  - a range of brochures advising “how to dispose safely of used syringes” and “what to do if you find a syringe”. ( to be released soon)

## **BARRIERS AND CHALLENGES**

The issues confronting the ACT NSP over the past 12 years are similar to those experienced in other jurisdictions. The primary issue provoking community angst has been the disposal of needles and syringes. The ACT has responded to public concern by strengthening its strategies around disposal. A related issue has been the call for one-for-one exchange of syringes (i.e. that supply of a needle is contingent on the return of a used needle). This has been resisted to date, and its continued resistance largely rests on the political will of the ACT Legislative Assembly.

An interesting historical event was the move towards the provision of a greater range of injecting paraphernalia in each pre-packed kit that was distributed. The rationale for this was the risks of transmission of hepatitis C in ways other than through sharing syringes. Some consumers did not like the new packs as they were too big and bulky. NSPs received strong negative comment about the packs and subsequently streamlined the packs.

It is expected that the issues of disposal and one-for-one exchange will continue to arise on a periodic basis. In addition, there has been some discussion about a move towards a user-pays system in the NSP’s primary and secondary outlets (as is already the case in community pharmacies).

The other issue that is of some import is after-hours access. Only one service (Calvary Hospital) provides FitPacks after 9pm and is not centrally located. ADDInc is currently negotiating with other potential hosts with a view to expanding the range of after-hours services.

## **NEW SOUTH WALES**

### **SNAPSHOT**

|                                    |              |
|------------------------------------|--------------|
| No of NSPs:                        | 797          |
| Syringes distributed in 1999-2000: | 11,566,000   |
| Approximate Cost:                  | \$10,290,000 |

### **HISTORY**

In 1987, the NSW government legalised possession of needles and syringes by amending the Drug Misuse and Trafficking Act 1985. A subsidised pharmacy program (the Pharmacy Distribution Scheme, later renamed the Pharmacy Fitpack Scheme) was funded in 1986 with the objectives of increasing access and encouraging the exchange of used syringes for new ones.

The public sector Needle and Syringe Program commenced in NSW in 1986 with a pilot program. In 1988, the program was rolled out across the state on an expanded pilot basis, with a focus on access, education, consumer involvement and the free supply and exchange of equipment.

Although possession of needles and syringes was legalised in 1987, possession of other items used to administer prohibited drugs, including other items of injecting equipment, remains illegal. Pursuant to the Act, the Director-General of Health is empowered to authorise a specified person or a specified class of persons to lawfully dispense needles and syringes (supply of which would otherwise be an offence). Two classes of agency can apply for approval to operate as an NSP. namely non-government organisations and public health sector



---

agencies. Approval is ultimately considered by the Chief Health Officer (NGO's) or Chief Executive Officer or Director (PHSA's).

Responsibility for statewide policy and planning of the NSP rests with the AIDS/Infectious Diseases Unit of the NSW Health Department. Responsibility for service delivery and operational matters is devolved largely to the state's 17 Area Health Services and, to a lesser extent, to a small number of community-based NGO's.

A recent significant event was the NSW Drug Summit, held in May 1999, which resulted in many progressive outcomes for the management and operation of drug-related programs in NSW. In the case of the NSP, the main benefit of the Drug Summit was that it demonstrated that there was broad support for the program and recognition of the need to expand the program commensurate with demand.

## **TYPES OF PROGRAMS**

NSW has significant numbers of all types of NSPs. It has 34 primary outlets, 282 secondary outlets, 28 outreach services, 56 vending machines and 397 community pharmacy outlets. Within each of the 17 Area Health Services, there is usually at least one primary outlet, often incorporating an outreach component, and a range of secondary outlets which are usually located within community health services, hospital emergency departments and local NGOs. This 'hub and spoke' type of approach to NSPs means that the local primary outlet provides support, training and supply of equipment to the secondary outlets within the same area.

There is a small number of primary NSPs operating through non-government organisations, some of which operate in a limited way or cater to a specific target population.

All primary, secondary and outreach NSPs provide needles and syringes, Fitpacks or other disposal containers and other injecting equipment (such as swabs, water, spoons and cotton balls) free of charge. Community pharmacies, operating as part of the Pharmacy Fitpack Scheme, supply Fitpacks that contain either 3, 5 or 10 syringes for a cost of around \$3.30 or free if the customer has an exchange. The pharmacies are provided the equipment, through the NSP program at no cost. Vending machines mostly supply a 5 pack with water and swabs for a cost of up to \$3 (\$1 and \$2 being most common).

Injecting equipment is also sold through about 400 non-participating pharmacies on a purely commercial basis. A 1 mL insulin syringe costs an average of \$1.50 through these pharmacies, although prices of up to \$4.50 for a single syringe have been reported.

All NSPs, including pharmacies, operating as part of the Pharmacy Fitpack Scheme, have disposal facilities provided as part of the program. In addition, a Needle Clean Up Hotline was introduced in 1997 in response to community disquiet generated through disposal of syringes. Whilst the initiative has had relatively modest resources committed, it appears to have significantly reduced visible community complaints about discarded needles. The program is now working on a strategy to further improve local responses to discarded needles by increasing the commitment and involvement of the local government sector.

## **BARRIERS AND CHALLENGES**

The early days of the program in NSW were characterised by a significant level of community acceptance in many areas and support from a number of key sectors, most notably the police. In more recent times there has been an erosion of bipartisan political support and the emergence of concerted, organised opposition from particular groups including some local government bodies. During the recent increase in heroin use, street-based drug activity became much more visible in a number of areas, leading to a marked increase in community anxiety. The issue of needle and syringe disposal continues to be the major source of community dissatisfaction with the program.

As a result of the Drug Summit in 1999, a range of new initiatives are now being trialed, including the medically supervised injecting centre in Kings Cross. Following the summit, it seems likely that there will be support for

---

further development of harm reduction programs in NSW (in contrast to the fight to simply preserve the status quo evident in some other states).

Currently the NSP appears to be limiting injection-related transmission of HIV to a very low level and this seems likely to continue for the foreseeable future. The main challenge to this relates to the possibility of outbreaks of HIV infection among particular populations with high levels of risk behaviour, including some indigenous populations and prison inmates. Ensuring effective access to prevention services for high-risk groups of this kind is a priority at this time.

The second major challenge is to achieve a significant reduction in hepatitis C infections. The extent to which further development of the NSP will enable this to be achieved is difficult to predict. Community understanding, acceptance and support for the NSP will probably be a key factor in determining whether such development occurs. Therefore, a key challenge now is to work out how to achieve a much higher, sustainable level of community support.

## NORTHERN TERRITORY

### SNAPSHOT

|                                    |                                            |
|------------------------------------|--------------------------------------------|
| No of NSPs:                        | 19 (2 primary, 5 secondary, 12 pharmacies) |
| Syringes distributed in 1999-2000: | 604,000 (Est)                              |
| Approximate Cost:                  | \$373,000 per annum (Est.)                 |

### HISTORY

Needle and Syringe Programs have been operating in the Northern Territory since in 1989, when the Northern Territory AIDS Council (NTAC) and the AIDS Council of Central Australia (ACOCA) were established. In late 1990/early 1991, the distribution of needles and syringes through pharmacies in Darwin commenced. The Misuse of Drugs Act 1990 requires the licensing of positions within particular agencies to distribute needles and syringes. To date, 19 licenses have been granted. In addition, all medical practitioners and pharmacists are automatically authorised to distribute needles and syringes.

Injecting drug use in the Northern Territory differs significantly from other states and the ACT. The most commonly injected drugs in Darwin are prescribed opioids (particularly morphine) and amphetamines. Supply of morphine has recently shrunk due to the regulation of the distribution of morphine through General Practitioners. This pattern is different in Alice Springs where the supply of heroin is more common.

### TYPES OF PROGRAMS

The two AIDS Councils (Darwin and Alice Springs) are the primary NSP outlets in the Northern Territory. Between them they distribute the majority of the 500,000 needles and syringes disseminated through NSPs in the NT each year. Supplementing the primary outlets are five secondary outlets operating through NT Health Service's sexual health clinics and Accident and Emergency Departments at each of the hospitals (located at Darwin, East Arnhem Land, Catherine, Tenant Creek and Alice Springs).

In addition to needles and syringes, primary outlets provide swabs and disposal units. Other items (such as condoms and injecting paraphernalia) may be provided on a cost-recovery basis through the core budget of the AIDS Councils. The services provided by the primary NSPs include education, advocacy, disposal, referral and support.

---

Needles and syringes are also distributed through commercial pharmacies. On commercial terms, pharmacies in the NT purchase “fit kits” from a third party source (either NT AIDS Council or suppliers from other states). These kits (consisting of 5 syringes and a disposal pack) are purchased for around \$3 and sold through pharmacies for between \$4 and \$6. It is not known how many of these kits are sold annually, but it is estimated to account for an additional 5-10% per annum (perhaps as many as 50,000 syringes).

The NT AIDS Council and Darwin City Council have collaborated to provide 10 disposal units in the Darwin area. The first of these was installed into the Casuarina Library in 1998. Prior to that, the only disposal facilities were located at NTAC and the Darwin Airport (men's toilets). Disposal units are also located in the male and female toilets at Alice Springs Airport.

## **BARRIERS AND CHALLENGES**

Like many other jurisdictions, NSPs in the Territory are a highly political issue and public perceptions have some influence over policy decisions. In recent times, increased cost recovery has been looked at and, accordingly, consideration is being given to strategies to increase the role of pharmacies as a major point of needle and syringe distribution. The other significant issue is that of disposal. On a regular basis the problem of needle and syringe disposal emerges and community debate ensues. The NT is currently developing a database to identify disposal hotspots. Contributing to the disposal issue is the fact that no pharmacy currently accepts used injecting equipment. Steps are being taken to provide bulk disposal facilities.

The legislative framework in the NT provides that needles and syringes can only be issued by licensed positions (as described above). This creates a difficulty when people in authorised positions are unavailable.

COAG funding has been provided for the establishment of an NSP in the suburb of Palmerston in Darwin. Prior to the NT Government issuing a license, it has required that the Palmerston Council support the new NSP. This support has not yet been forthcoming and, accordingly, the Palmerston NSP is yet to commence.

## **QUEENSLAND**

### **SNAPSHOT**

|                                    |                                                     |
|------------------------------------|-----------------------------------------------------|
| No of NSPs:                        | 132 (+800 estimated pharmacies)                     |
| Syringes distributed in 1999-2000: | 5,300,000 (+5,000,000 estimated through pharmacies) |
| Approximate Cost:                  | \$1,678,000                                         |

### **HISTORY**

The enabling legislation for Needle and Syringe Programs in Queensland was enacted in the Drugs Misuse Act (as amended) 1989. The amendment allows for the supply of needles and syringes to any person for any lawful purpose. It also allows for the supply of needles and syringes to any person by medical practitioners, pharmacists and persons approved by the Minister of Health for the purposes of illegal drug use. This requires the Minister of Health to approve all staff or staff positions involved in NSPs. To obtain approval, staff are required to attend and successfully complete a 4-hour training program, upon which their names or positions are submitted to the Minister for final approval.

Prior to 1989, single syringes were sold commercially through pharmacies. The original Queensland NSP (known then as the Statewide HIV/AIDS and IDU Program) was located within the Sexual Health Unit of Communicable Diseases. In 1997, following a review of needle and syringe availability, the management of NSPs was shifted to Alcohol, Tobacco and Other Drugs Services.

---

Distribution of needles and syringes has tripled over the past six years (1996-2001). There has been an explosion of amphetamine use over this time (there are now an estimated 85,000 amphetamine users in Queensland) and it is likely that many people who use amphetamines are injecting on a casual basis. Use of heroin is not as dominant as it is in some other states; even so it is estimated that Queensland has approximately 17,000 heroin-dependent persons.

## **TYPES OF PROGRAMS**

Queensland has 132 needle and syringe programs currently operational, which distribute around 5,000,000 needles and syringes per annum. The program has two primary Queensland Health operated sites (Brisbane and Cairns) and 130 secondary and NGO sites. In addition, outreach services are provided through some of the NGOs. Brisbane City Council and Queensland Health are in the process of establishing an after-hours street-based service to distribute equipment within the Fortitude Valley area. Biala, located in Brisbane, is the largest NSP in Australia and accounts for approximately 34% of the total number of syringes distributed in Queensland each year. It is a 24hour/7days per week alcohol and drug service with a full range of services including a methadone clinic and an AIDS medical unit. It is Queensland Health policy that every health service district must provide at least one NSP within its area. In addition, Accident and Emergency Services in all publicly funded hospitals are strongly encouraged to operate NSPs. However, some hospitals do not operate NSPs, while others operate the program without uniformity of service or with little enthusiasm.

Like programs in all states, the range of activities that each service engages in is commensurate with their degree of specialisation. The primary sites, NGOs and larger secondary sites provide a comprehensive range of services (greater range of injecting paraphernalia, provision of condoms, BBV testing, referrals, support and information), whereas the smaller programs are more likely to only provide basic services.

In addition to the provision of equipment, all Queensland Health NSPs provide used sharps collection and disposal facilities. Brisbane City Council has also recently installed 300 disposal bins in and around the city. Many other local councils have already, or are in the process of installing sharps disposal bins in appropriate locations.

The legislation automatically authorises all pharmacists to sell syringes. There are approximately 1,000 retail pharmacies in Queensland and it is estimated that around 80% of them sell needles and syringes at a retail price of between \$2 and \$5 for a five pack (average price is \$3). It is estimated that these pharmacies distribute about 5,000,000 syringes per annum (approximately the same number as the NSP). However, as this commercial operation takes place without any government involvement or regulation, it is difficult to determine exact figures. Queensland Health is in the process of talking directly with wholesalers of injecting equipment to obtain more accurate and detailed information.

## **BARRIERS AND CHALLENGES**

From the outset of operating NSPs in Queensland, the program has experienced a significant level of public antagonism. This is well illustrated by the recent call from the Northern Queensland Local Government Association for the banning of NSPs. As a result, NSPs are continually defending their position and are operating from a position of reactivity rather than acting in accordance with sound evidence-based practice.

The major issue for action in Queensland, is the safe disposal of used needles and syringes. Although 80% of pharmacies sell syringes, almost none accept returned sharps. Queensland Health is currently exploring options with the Queensland Pharmacy Guild to encourage pharmacies to provide sharps disposal facilities. In addition to pharmacies, Queensland Health is working in partnership with local government to deal with disposal issues. This has resulted in the creation of a collaborative project between Queensland Health and the Local Government Association of Queensland within the framework of the Queensland Public Health Partnership Protocols. The first concrete result being the establishment of an 1800 State wide clean needle helpline.

---

# SOUTH AUSTRALIA

## SNAPSHOT

|                                    |           |
|------------------------------------|-----------|
| No of NSPs:                        | 151       |
| Syringes distributed in 1999-2000: | 3,018,000 |
| Approximate Cost:                  | \$830,000 |

## HISTORY

In South Australia, the "Clean Needle Program" (CNP) is operated by the Drug and Alcohol Services Council (DASC) within a licensing framework. The legislation (the Controlled Substances Act) provides for trained agency representatives to possess and distribute needles and syringes in compliance with agency protocols.

The Clean Needle Program commenced in South Australia in 1989. The first fixed-site services were located at SAVIVE (South Australia Voice for IntraVenous Education) and Warinilla (a drug treatment service). The pharmacy program commenced in SA in the early 1990's.

## TYPES OF PROGRAMS

Of the 151 NSPs in South Australia, there is 1 primary outlet (SAVIVE), 66 secondary outlets (located in hospitals, community health centres and youth services) and 84 community pharmacies (from a potential pool of 380 pharmacies). An informal outreach service is provided by SAVIVE, via their peer educators' informal network. A vending machine was installed at SAVIVE, but was vandalised and is no longer operational. An issue was raised about the appropriateness of vending machines given that they only disseminate equipment and do not provide users with information about safe using.

Of the primary and secondary outlets, 32 are based in the metropolitan area of Adelaide and 34 are in rural areas (mainly in country hospitals). The absence of any metropolitan hospitals from the program means that there are no 24-hour services in Adelaide, although there is 24-hour access through the majority of country hospitals.

The community pharmacy program is run on a partial cost-recovery basis. The program supplies community pharmacies with Fitpacks at no cost and charges these pharmacies (at cost price) for syringes supplied (\$0.1386 per syringe). Pharmacies sell Fitpacks to consumers at a cost of \$5 for a 10 pack and \$4 for a three pack. If consumers return a Fitpack, they receive a \$2.00 discount on a new pack. Currently, the syringes for the Fitpacks are supplied in bulk through the program, with pharmacies being required to assemble the packs themselves. This element of the program has been identified as having an impact on pharmacists' willingness to participate in the program, and is currently being addressed.

In addition to pharmacies that participate in the Needle and Syringe Program, other pharmacies sell needles and syringes on a purely commercial basis. They order equipment (such as the SK-3) from pharmacy wholesales and retail them at whatever price they consider appropriate. As these transactions are outside the bounds of the program, there is very little information available about quantity and price.

Disposal facilities are provided through the program at all NSP sites, including community pharmacies. Some local councils also provide disposal facilities at various sites such as public toilets and council offices. SA has recently launched a Needle Clean Up Hotline, operated through the Alcohol and Drug Information Service (ADIS), whereby members of the public can report syringes found in public places.

---

## BARRIERS AND CHALLENGES

Access to NSPs in some locations (some country areas have resisted the introduction of an NSP into their community) and on a 24/7 basis in Adelaide have been issues for the program over the past few years. Only two sites in Adelaide provide after-hours access (at Hindmarsh and Norwood) and neither of these sites are open 24 hours. Encouraging metropolitan hospitals to participate in the program is identified as a major challenge for the immediate future.

There have been several barriers to the involvement of pharmacies in the program, including issues relating to clients' behaviour in the pharmacy (people accessing the methadone program rather than the NSP are not differentiated) and the time-consuming process of assembling the Fitpacks. One of the objectives for the program in SA is to increase the number of community pharmacies participating in the program and work has already commenced through the Pharmacy Guild (SA Branch), to further that objective. An initiative that is being pursued through the community pharmacy program is the provision of information and linkages with other services.

There is a reasonable level of political and community goodwill towards the program and it seems to have been relatively immune from the attacks that the program has faced in some other states.

As distribution of equipment increases, so do the costs of running the program. There is a desire to increase the range of equipment that is available through the program (including spoons and filters), but it is recognised that this will further exacerbate the problem of rising costs.

## TASMANIA

### SNAPSHOT

|                                    |           |
|------------------------------------|-----------|
| No of NAPs:                        | 88        |
| Syringes distributed in 1999-2000: | 1,381,000 |
| Approximate Cost:                  | \$622,000 |

The program in Tasmania is referred to as the "Needle Availability Program ("NAP").

### HISTORY

In 1993, the Tasmanian Parliament passed the HIV/AIDS Preventive Measures Act, which established the regulatory framework for NAPs. Prior to this time, there had been some informal (and unlawful) dissemination of needles and syringes by individuals committed to preventing the transmission of HIV. The Act declares that permits are required to operate an NAP and identifies the basis upon which permits can be issued. Agencies wanting to run a NAP apply for a permit, nominate the individual (s) who will disseminate the equipment and have the conversation with the clients, attend education and training sessions etc. Once the permit is granted, the individual (permit holder) can delegate these powers to others, should they be unable to undertake them themselves.

The management of the NAP has always rested within the Sexual Health Branch under the Division of Health Advancement within the Department of Health and Human Services. There have been some suggestions that it should be moved to Drug and Alcohol Services within in the Department of Health and Human Services. This has, however, been resisted, on the basis that the focus of the program must be harm reduction and this is in sometimes in contrast with the philosophy surrounding the Alcohol and Drugs Services' approach to drugs.

---

The most commonly injected drugs in Tasmania vary between regions. Clients indicate, via a data-collecting tool administered to clients each time they access a NAP, that in Hobart the drugs mostly commonly injected are morphine or methadone; in Launceston it is morphine and amphetamines; and on the north-west coast, amphetamines are the drugs mostly injected. In 1999/00 only 4.3% of injecting drug users in Tasmania indicated that they mostly inject heroin.

## **TYPES OF PROGRAMS**

Tasmania has no primary outlets (its largest NAP is located within the Tasmanian Council on AIDS and Related Diseases TasCAHRD), 28 secondary outlets (disseminating approximately 80% of all syringes) and 60 pharmacy-based outlets (disseminating approximately 20% of all syringes).

The secondary outlets are co-located with a range of services including hospitals, community health services, youth health and drug and alcohol services. There are a few 24/7 services, located within Accident and Emergency Departments in hospitals. Unfortunately, this is not the case in either Hobart or Launceston, although in Hobart a 24/7 Alcohol and Drug Detoxification Unit is involved in the program.

The secondary outlets order injecting equipment from a Medical Supply Company with which the Tasmanian Department of Health and Human Services ("DHHS") has a contract. The equipment is available to the NAP at no cost, but the outlets do not receive funding to provide the NAP service nor any ancillary services (such as disposal, referral, information, staff etc).

Pharmacy-based outlets provide equipment to clients for a fee. They order equipment in the same manner as secondary outlets and, similarly, are not charged for the supply of this equipment. Unfortunately, due to a range of factors, the variety of equipment available through the pharmacy-based outlets is usually limited to 1mL Fitpacks.

The standard prices that are charged for equipment are \$6 for a 10 pack (10 syringes, 10 swabs, 10 water ampoules, Fitpack10 disposal unit) and \$4 for the 3 pack (3 syringes, 3 swabs, 3 water ampoules and FitPack3 disposal unit). If the client returns a FitPack they are able to purchase a 10 pack for \$3 and a 3 pack for \$2. If however, they cannot afford to pay, they will not be refused equipment. The Department of Health and Human Services has an agreement with pharmacies that was written 10 years ago. A Memorandum of Understanding is now being negotiated between the Department of Health and Human Services and the Pharmacy Guild of Australia (Tasmanian Branch) to clearly document the roles and responsibilities of both Government and Pharmacies in the NAP. All pharmacy-based outlets provide disposal facilities for returned equipment at their own cost.

NAPs provide an extensive range of equipment including different types and sizes of needles (18-30 gauge), different types and sizes of syringes (1mL-20mL), a range of sharps containers (1.4-68 litre), water swabs, FitPacks (3 and 10), insulin syringes (27 and 29 gauge). Outlets are able to order whatever equipment they believe their clients need, and package it in appropriate ways. In other words, there is no standard "pack" provided through Tasmanian NAPs. Secondary outlets do not charge consumers for any of the equipment that they supply through the NAP.

In addition to the pharmacy-based outlets participating in the NAP (approximately 50% of all pharmacies in Tasmania), other pharmacies sell syringes on a purely commercial basis.

## **BARRIERS AND CHALLENGES**

The biggest barrier that has been faced in Tasmania, like most jurisdictions, is the political sensitivity of needle and syringe programs. As a result, the government has chosen to take a low key, discrete approach to the operation of NAPs.

---

Some government health agencies, although well positioned to host an NAP (such as large metropolitan hospitals and community health centres), have declined invitations to be involved. They appear not to have been further encouraged by respective Ministers.

Another issue has been the trend away from bipartisan political support for the NAP in Tasmania since the last change of government. This has led to the NAP being used for political purposes, rather than being recognised as an important public health initiative. It is anticipated that this push to dampen down public health initiatives could have significant future consequences for the program.

As a result of the continual increase in the number of needles and syringes distributed, the costs of running the Program are also increasing. This has led to varying suggestions for strategies including a review of the program and a user-pays program.

## VICTORIA

### SNAPSHOT

|                                    |             |
|------------------------------------|-------------|
| No of NSPs:                        | 215         |
| Syringes distributed in 1999-2000: | 6,177,000   |
| Approximate Cost:                  | \$4,767,000 |

### HISTORY

Needle and Syringe Programs commenced in Victoria with four pilot programs in 1987. In 1988, the program was expanded state-wide. NSPs are governed by the Drugs, Poisons and Controlled Substances Act 1981 (Vic) which provides an exclusion for people authorised by that Act from the laws governing aiding and abetting illicit drug use. The Act enables the authorisation of agencies wanting to host an NSP (and records the agency name, positions, roles and hours of operation), as well as a general authorisation for pharmacists and pharmacy assistants. Once authorised by the Minister for Health, any changes within a service (eg hours of operation) must be notified to the Department. The requests for authorisation are considered by the Department, prior to making recommendations to the Minister. The Department gives consideration to such issues as consultation with the local community, the proposed location, training and general understanding of the operations of an NSP.

Until the most recent change of government (in December 1999), the NSP administration was located within Communicable Diseases Branch of Public Health. It is now located within the Drugs Policy and Services Branch of Victorian Department of Human Services.

Reports indicate that the main drug being used in Victoria is heroin, although in its absence (such as during the recent heroin drought), amphetamine use increases.

### TYPES OF PROGRAMS

Of the 215 registered programs in Victoria, 14 are primary outlets (fully funded through the program), 180 are secondary outlets (which provide consumables, written resources and training) and 22 are pharmacy-based programs. In addition, there are 3 enhanced secondary outlets, located in drug hotspots, which are funded for some staff time, some disposal facilities and some community education and promotion.

Pharmacy involvement in the government-auspiced program is fairly limited, but other pharmacies do sell equipment. Those participating in the NSP program receive consumables for free and are supposed to provide it



---

to users free of charge (which removes the profit incentive for pharmacy involvement). The Department operates the ordering and supply process for all NSPs.

The equipment supplied through the NSPs includes needles, syringes (in a variety of sizes), swabs, condoms, lube, disposal units, plastic bags and printed materials. They do not currently supply water, spoon and filters, but consideration is being given to the possible provision of these items. There is some variation in what is supplied in a standard kit from NSPs as some choose to make up their own packs.

With respect to outreach services, there are two foot patrols, one of which operates on a fixed route. One foot patrol works within the CBD during the day and night. Another foot patrol, in the Springvale area, operates during the day only. In metropolitan Melbourne, there are also seven car-based outreach programs operating each evening, seven days a week, until about 11 pm. There are two car-based outreach programs operating during the day.

Another outreach project in Victoria is the steroid project, which employs a worker to provide information about safe using and consumables to users of anabolic steroids. This project was piloted in 1996 and has been running since 1997.

All needle and syringe programs have disposal facilities supplied and maintained by Departmental funding. A Helpline has also been established to provide advice and referral to people who find a syringe that has been disposed of. If there is an agency in the area that has a collection service, the referral is made to that agency (eg Fitzroy NSP or a local government authority). Otherwise the person is given information about how to pick up the syringe safely. In addition, many local councils have installed disposal units in locations such as public toilets.

## **BARRIERS AND CHALLENGES**

Like most jurisdictions, disposal incidents have plagued the operations of the NSP. The highest profile of these incidents involved a well-known triathlete who received a needle stick injury from a discarded needle on St Kilda beach. This resulted in huge media coverage and public outrage. There is a constant level of public concern about NSPs and a lack of understanding about the rationale for such programs. Like other states, the name of the program was changed (by the deletion of the word 'exchange') to reduce expectations that NSPs achieved or should achieve a 1-for-1 exchange of equipment.

The Minister for Health launched a 'Safe Needle Disposal Strategy' in January 2001 that includes the establishment of the HelpLine and a number of strategies relating to surveillance, best practice disposal and retrieval and working with local government to improve and expand retrieval services. A Monitoring Group with representation from NSPs, users, local government, pharmacies, public transport, police and epidemiology has been established to oversee the implementation of the strategy.

The role of NSPs within mainstream health services has also been a constant issue. It is not widely accepted that the provision of an NSP is part of the public health role of these services, and so the introduction of NSPs has been resisted by some health workers.

One issue that has not been raised in other jurisdictions is that of planning issues for local government that arise when application is made for planning approval for a needle and syringe program. Negotiations are currently underway to develop guidelines that will clarify this process.

Current debates and anticipated future issues in Victoria include the call for the use of retractable needles, educating the public about the real risks of transmission of communicable diseases as a result of a non-occupational needle-stick injury (to reduce concerns about needle and syringe disposal) and an apparent increase in the intensity of media sensationalism about NSPs.

Another issue of concern in Victoria relates to the requirement for the legalisation of possession of used equipment. Whilst it is not illegal to possess used equipment, the equipment and its contents can be seized,

---

tested and used in evidence to support other charges. This is reported by NSPs as being a barrier to appropriate disposal such as carrying a container of used syringes to an NSP and is likely to contribute to the immediate disposal of equipment at the location of its use (i.e. inappropriate disposal).

## WESTERN AUSTRALIA

### SNAPSHOT

|                                    |                      |
|------------------------------------|----------------------|
| No of NSPs:                        | 80 (plus pharmacies) |
| Syringes distributed in 1999-2000: | 3,209,000            |
| Approximate Cost:                  | \$3,576,000          |

### HISTORY

The Poisons Act 1964, was amended in 1994 to create a legal defence for persons participating in approved needle and syringe programs. The power to approve applications from organisations wishing to be authorised pursuant to this Act is vested in the Commissioner of Health, Health Department of WA. Legislatively, responsibility for the administration of needle and syringe programs in WA is carried by the Chief Pharmacist (Environmental Health: Drugs Poisons and Therapeutic Goods Control Section), Health Department of Western Australia. However, the Sexual Health Program, Communicable Disease Control Branch, Health Department of Western Australia plays a major role in liaison with service providers and providing statewide coordination of the program.

Until 1994, the provision of injecting equipment to people who were injecting drugs illicitly was illegal, and providers of needles and syringes could, as the law stood, have been charged with an offence under the Western Australian Criminal Code. Despite this, pharmacists and other services provided sterile needles and syringes to injecting drug users as a critical public health strategy in the prevention of further transmission of HIV. The Poisons Act amendments of 1994 led to an increase in the number of needles and syringes distributed and the number of outlets. NSPs first commenced in WA in 1987, with the Health Department of Western Australia administering a program providing sterile injecting equipment to injecting drug users (IDUs) in "SS5" kits (consisting of a disposal container, 5 sterile needles and syringes, condoms, and information pamphlets). These were distributed through the Western Australian AIDS Council and other agencies, and retailed through pharmacies. In July of 1992, Fitpacks<sup>®</sup> were introduced to replace the SS5 kits.

### TYPES OF PROGRAMS

WA has one dedicated fixed-site primary needle and syringe exchange, three mobile outreach exchange services, 75 secondary outlets, and one vending machine. The primary site is operated by Western Australian Substance Users' Association (WASUA) and is located in Northbridge (Perth). The Western Australian AIDS Council (WAAC) operates two mobile services from a range of different sites in Perth and a new mobile program operated by WASUA has been established in the regional centre of Bunbury (funded through COAG Diversion Initiative). Secondary outlets are provided through other services such as hospitals (41 outlets), health units, nursing posts and community health centres. They account for less than 5% of total needle distribution in WA.

Two vending machines had been installed at a drug and alcohol service operated by the Health Department, but they are currently non-operational due to vandalism. When operational, the vending machines were disseminating just over 1% of all needles and syringes. A trial of a vending machine commenced operation at Kalgoorlie Regional Hospital in March 2001. In the first eight weeks of operation, similar numbers of Fitpacks<sup>®</sup> have been vended through the machine at cost of \$3.00 as were given out at no cost over the counter of the

---

Accident and Emergency Department for same time period last year. The machine has to date not been vandalised or broken into.

The operations of NSPs in WA are significantly different from those in other states in several significant ways. Firstly, approximately sixty-five per cent of needles and syringes distributed in WA are sold through pharmacies. Secondly, the two services that offer exchange do so on a cost-recovery basis, that is, a charge of 25c per needle if there is no exchange.

The pharmacy program is commercial in nature (equipment is ordered directly from the pharmaceutical wholesaler and sold at a price determined by the pharmacy). The Health Department of WA supplies information labels that are attached to the Fitpacks<sup>⊃</sup> at the point of manufacture and packing (i.e. prior to dispatch to the pharmaceutical wholesalers). Under a collective licence held by the Pharmaceutical Council of WA, pharmacists are licensed to sell only Fitpacks<sup>⊃</sup>, Fitpack<sup>⊃</sup> Plus and Sharpkitz, and most commonly retail a combination of these products. Fitpacks<sup>⊃</sup> consist of 5 syringes in a disposal unit (average price 5.50), whilst Fitpacks<sup>⊃</sup> Plus contain 3 syringes, water, swabs and spoons in a disposal unit (average price \$6.50). Prices for each product vary significantly between outlets (including across location and hours of operation). There are no return discount or exchange, nor disposal facilities provided through pharmacies. There are a few pharmacists that have applied for individual licenses to allow them to sell loose needles and syringes with a disposal container.

The Health Department of WA includes safe disposal messages on all Fitpack<sup>⊃</sup> labels, and has produced a pamphlet to inform the general public on how to appropriately dispose of used needles and syringes they may find discarded. Further, HDWA has made available to local government authorities needle and syringe disposal bins for installation in their public amenities. Maintenance of the bins is the responsibility of the local government authority. The WASUA and WAAC NSPs provide disposal facilities for used equipment.

A demonstration project involving WA Drug Abuse Strategy Office, WA Police Service, HDWA, local governments (Town of Vincent and City of Perth) and WASUA has developed strategies and resources to educate both the general public and people who inject drugs in the practice of safe disposal of used injecting equipment.

## **BARRIERS AND CHALLENGES**

Historically, public and political support for the program has been one of the most difficult barriers to overcome. There has been a level of recognition of the need for the program from the government, but this has fallen short of making public statements to that effect. The media occasionally seizes on events such as needle and syringe disposal and makes a significant public issue out of it. There is a minority within the community who voice marked opposition to the program.

The major issues in WA for the NSP are those of access and equity. The sheer size of the state and the distribution of the population across the state make access for many people problematic. There is now a reasonable coverage of NSPs and/or participating pharmacies across WA, but there are some areas (such as some mining towns) where injecting drug use is known to be occurring but the supply of injecting equipment is limited. 24-hour access also poses an issue, as there is only one 24-hour pharmacy based in Perth and some of the major regional centres do not have 24-hour outlets (NSPs or pharmacies). Historically, there was an informal agreement between the Health Department and the Pharmacy Guild (WA Branch) that the Department would not establish an NSP in an area during pharmacy trading hours. This agreement is now being revisited as it is restricting access in some locations.

Equity of access is an issue in WA more so than in any other state as it is the only state that operates its NSPs largely on a cost-recovery basis and its pharmacy program is commercial. This means that people in areas not serviced by an NSP can only access Fitpacks<sup>⊃</sup>, at full retail price (around \$5 to \$6 in rural areas and \$5 to \$7 in metropolitan areas) and this is likely to have an impact on people with lower incomes. As noted above, the only 24-hour service in Perth is located in a pharmacy. This raises an issue of after-hours access not only for people on lower incomes and others who are price sensitive, but also for those who live in outer metropolitan areas, and

---

does not allow for choice in mode of service provision. These issues are currently being considered in WA, whilst recognising the costs involved in adding more NSPs to the current service system.

The WA Health Department is conscious of the advantages of having such a successful pharmacy program at a very low cost, but also recognises the dilemmas that have been created through the agreement with the Pharmacy Guild at the inception of the program. This issue is in the process of being explored with a view to widening access and the availability of needles and syringes.

---

---

## **APPENDIX B**

### **DISCUSSION OF THE METHODOLOGY USED IN THE ECOLOGICAL STUDY**

---

The effectiveness of NSPs reducing HIV incidence was estimated by first fitting for each city a linear regression line, on a logit scale, to give an estimate of the overall average annual rate of change of prevalence for each city. Effectiveness of NSPs was then estimated by comparing those cities which ever had NSPs with those cities which never had NSPs.

The justification for this approach lies in the fact that an estimate for HIV incidence in a given city can be taken approximately to be the change in prevalence. Fitting a simple linear regression line, over the entire available time period, for each city therefore gives an estimate of the average annual HIV incidence for that city over the whole available time period. Regression lines were fitted on a logit scale to avoid problems with fitted lines becoming negative or greater than one. There are several advantages to this approach:

1. This methodology was adopted in a peer-reviewed publication in a top-ranking medical journal, and as such represents the most widely accepted standard approach (Hurley et al. 1997).
2. The approach is simple, transparent, unbiased and clearly defined. Fitting a simple linear regression line can be done for each city in a completely consistent fashion without introducing any arbitrary decisions into the fitting procedure which would need either further data or assumptions to be made, and which could introduce biases. The approach also gives a well-defined, single summary statistic, namely the rate of change in HIV prevalence (the slope of the regression line) which can be compared between cities with and without NSPs.
3. The approach is robust in the sense that a simple linear regression gives an overall average estimate of annual change in HIV prevalence over the entire time period considered.
4. The approach is conservative in that by comparing cities which never had NSPs with cities which ever had NSPs, the effectiveness of NSPs will tend to be underestimated.

There are however some possible problems with this approach. First, the estimated annual rate of change in HIV prevalence for a given city will depend upon where in the HIV-epidemic natural history HIV-prevalence surveys were first conducted. In cities which started surveys after a HIV-epidemic was established among injecting drug users (IDUs), HIV prevalence would tend to be high initially, and fitted slopes therefore somewhat low. In cities which started surveys before an epidemic was established, there is the potential for much larger fitted slopes. Furthermore, the effectiveness of NSPs in reducing established HIV-epidemics might not apply to the effectiveness of NSPs in preventing HIV-epidemics among IDUs. In Australia, NSPs were introduced while HIV-prevalence among IDUs was low. The extent to which estimates of NSP effectiveness based on changes in HIV-seroprevalence from all cities, including those cities with HIV-epidemics which were well established, should be applied to Australia is arguable. In order to address this point, secondary analyses estimating the effectiveness of NSPs based only on those cities which had an initial HIV-seroprevalence estimate below 10% were conducted, corresponding broadly to the state of the HIV-epidemic among IDUs in Australia. These analyses gave qualitatively very consistent results to the overall analysis including all cities (see Table 3.1.2), suggesting that the results are relatively robust to this point.

A second criticism of the approach is that fitting simple linear regression lines to each city's HIV-seroprevalence survey estimates is unnecessarily simplistic. It may be that there is a general form to the HIV-epidemic natural history among IDUs, with a rapid increase in seroprevalence early in an epidemic, followed by a plateau as prevalence attains high rates, and possible even a gradual decline as other preventive measures, such as general HIV-education programs, are introduced. A much better fit to the data in each city might be achieved by fitting a more flexible regression curve, for example introducing a quadratic term. An estimate of the rate of change in HIV-prevalence for each city could then be obtained by choosing a time-period, for each city, which corresponded to the epidemic in Australia, and using the fitted curve at the start and end of this period to estimate an average annual rate of change during the period. There are two disadvantages to this procedure. First, the choice of curve fitted to each city becomes somewhat arbitrary. Second, the choice of time period for each city corresponding to the epidemic in Australia would have to depend on further data (which in this case were unavailable) or further assumptions, which could be used to introduce bias into analyses. For these reasons, estimates of NSP effectiveness on reducing HIV incidence were based on the simple linear regression approach described above. However, more complex curve fitting procedures might be the subject of future research.

---

## **APPENDIX C**

### **DETAILED TABLES OF EFFECTS OF NSPs ON HIV AND HCV**



**Table 3.4.1 Estimated number of people living with HIV/AIDS and total deaths with NSP introduction<sup>1</sup>**

| Year | HIV/AIDS <sup>2</sup> | HIV CD4 >500 | HIV CD4 <500 | AIDS | Total deaths <sup>3</sup> |
|------|-----------------------|--------------|--------------|------|---------------------------|
| 1981 | 2                     | 2            | 0            | 0    | 0                         |
| 1982 | 7                     | 7            | 0            | 0    | 0                         |
| 1983 | 23                    | 22           | 1            | 0    | 0                         |
| 1984 | 60                    | 57           | 2            | 1    | 0                         |
| 1985 | 121                   | 112          | 8            | 1    | 0                         |
| 1986 | 201                   | 180          | 18           | 3    | 1                         |
| 1987 | 284                   | 241          | 36           | 7    | 3                         |
| 1988 | 355                   | 281          | 63           | 12   | 7                         |
| 1989 | 409                   | 293          | 97           | 18   | 13                        |
| 1990 | 445                   | 284          | 135          | 26   | 21                        |
| 1991 | 466                   | 260          | 171          | 34   | 33                        |
| 1992 | 474                   | 229          | 202          | 43   | 49                        |
| 1993 | 471                   | 195          | 225          | 50   | 68                        |
| 1994 | 465                   | 168          | 240          | 57   | 91                        |
| 1995 | 456                   | 147          | 247          | 61   | 116                       |
| 1996 | 452                   | 133          | 256          | 64   | 137                       |
| 1997 | 449                   | 123          | 262          | 65   | 157                       |
| 1998 | 449                   | 116          | 267          | 66   | 176                       |
| 1999 | 450                   | 112          | 272          | 66   | 193                       |
| 2000 | 453                   | 109          | 279          | 65   | 208                       |
| 2001 | 433                   | 84           | 285          | 63   | 223                       |
| 2002 | 413                   | 62           | 289          | 62   | 238                       |
| 2003 | 394                   | 43           | 290          | 61   | 253                       |
| 2004 | 375                   | 29           | 286          | 59   | 267                       |
| 2005 | 356                   | 19           | 279          | 58   | 281                       |
| 2006 | 338                   | 12           | 269          | 56   | 295                       |
| 2007 | 320                   | 8            | 258          | 55   | 308                       |
| 2008 | 303                   | 5            | 245          | 53   | 321                       |
| 2009 | 286                   | 3            | 232          | 51   | 334                       |
| 2010 | 271                   | 2            | 220          | 49   | 346                       |
| 2011 | 255                   | 1            | 208          | 46   | 357                       |
| 2012 | 241                   | 1            | 196          | 44   | 368                       |
| 2013 | 227                   | 0            | 184          | 42   | 379                       |
| 2014 | 213                   | 0            | 173          | 40   | 389                       |
| 2015 | 201                   | 0            | 163          | 38   | 399                       |
| 2016 | 189                   | 0            | 153          | 35   | 408                       |

| Year | HIV/AIDS <sup>2</sup> | HIV CD4 >500 | HIV CD4 <500 | AIDS | Total deaths <sup>3</sup> |
|------|-----------------------|--------------|--------------|------|---------------------------|
| 2017 | 177                   | 0            | 144          | 33   | 417                       |
| 2018 | 166                   | 0            | 135          | 31   | 425                       |
| 2019 | 156                   | 0            | 126          | 29   | 432                       |
| 2020 | 146                   | 0            | 118          | 28   | 439                       |
| 2021 | 137                   | 0            | 111          | 26   | 446                       |
| 2022 | 128                   | 0            | 104          | 24   | 452                       |
| 2023 | 120                   | 0            | 97           | 23   | 458                       |
| 2024 | 112                   | 0            | 90           | 21   | 464                       |
| 2025 | 104                   | 0            | 84           | 20   | 469                       |
| 2026 | 97                    | 0            | 78           | 19   | 474                       |
| 2027 | 90                    | 0            | 73           | 17   | 479                       |
| 2028 | 84                    | 0            | 67           | 16   | 483                       |
| 2029 | 77                    | 0            | 62           | 15   | 487                       |
| 2030 | 72                    | 0            | 58           | 14   | 490                       |
| 2031 | 66                    | 0            | 53           | 13   | 494                       |
| 2032 | 61                    | 0            | 49           | 12   | 497                       |
| 2033 | 56                    | 0            | 45           | 11   | 500                       |
| 2034 | 51                    | 0            | 41           | 10   | 503                       |
| 2035 | 47                    | 0            | 38           | 9    | 505                       |
| 2036 | 43                    | 0            | 34           | 9    | 507                       |
| 2037 | 39                    | 0            | 31           | 8    | 510                       |
| 2038 | 35                    | 0            | 28           | 7    | 511                       |
| 2039 | 32                    | 0            | 25           | 7    | 513                       |
| 2040 | 28                    | 0            | 22           | 6    | 515                       |
| 2041 | 25                    | 0            | 20           | 5    | 516                       |
| 2042 | 23                    | 0            | 18           | 5    | 518                       |
| 2043 | 20                    | 0            | 16           | 4    | 519                       |
| 2044 | 18                    | 0            | 14           | 4    | 520                       |
| 2045 | 15                    | 0            | 12           | 3    | 521                       |
| 2046 | 13                    | 0            | 10           | 3    | 522                       |
| 2047 | 11                    | 0            | 9            | 3    | 523                       |
| 2048 | 10                    | 0            | 7            | 2    | 523                       |
| 2049 | 8                     | 0            | 6            | 2    | 524                       |
| 2050 | 7                     | 0            | 5            | 2    | 524                       |
| 2051 | 6                     | 0            | 4            | 1    | 525                       |
| 2052 | 5                     | 0            | 4            | 1    | 525                       |
| 2053 | 4                     | 0            | 3            | 1    | 526                       |

| Year | HIV/AIDS <sup>2</sup> | HIV CD4 >500 | HIV CD4 <500 | AIDS | Total deaths <sup>3</sup> |
|------|-----------------------|--------------|--------------|------|---------------------------|
| 2054 | 3                     | 0            | 2            | 1    | 526                       |
| 2055 | 3                     | 0            | 2            | 1    | 526                       |
| 2056 | 2                     | 0            | 1            | 1    | 526                       |
| 2057 | 2                     | 0            | 1            | 0    | 526                       |
| 2058 | 1                     | 0            | 1            | 0    | 527                       |
| 2059 | 1                     | 0            | 1            | 0    | 527                       |
| 2060 | 1                     | 0            | 0            | 0    | 527                       |
| 2061 | 0                     | 0            | 0            | 0    | 527                       |
| 2062 | 0                     | 0            | 0            | 0    | 527                       |
| 2063 | 0                     | 0            | 0            | 0    | 527                       |
| 2064 | 0                     | 0            | 0            | 0    | 527                       |
| 2065 | 0                     | 0            | 0            | 0    | 527                       |
| 2066 | 0                     | 0            | 0            | 0    | 527                       |
| 2067 | 0                     | 0            | 0            | 0    | 527                       |
| 2068 | 0                     | 0            | 0            | 0    | 527                       |
| 2069 | 0                     | 0            | 0            | 0    | 527                       |
| 2070 | 0                     | 0            | 0            | 0    | 527                       |

1. NSP introduction in 1988

2. HIV/AIDS=number of people living with either HIV (CD4>500+CD4<500) or AIDS

3. Total deaths=cumulative deaths

**Table 3.4.2 Estimated number of people living with HIV/AIDS and deaths without NSP introduction**

| Year | HIV/AIDS1 | HIV CD4 >500 | HIV CD4 <500 | AIDS | Total deaths2 |
|------|-----------|--------------|--------------|------|---------------|
| 1981 | 2         | 2            | 0            | 0    | 0             |
| 1982 | 7         | 7            | 0            | 0    | 0             |
| 1983 | 23        | 22           | 1            | 0    | 0             |
| 1984 | 60        | 57           | 2            | 1    | 0             |
| 1985 | 121       | 112          | 8            | 1    | 0             |
| 1986 | 201       | 180          | 18           | 3    | 1             |
| 1987 | 284       | 241          | 36           | 7    | 3             |
| 1988 | 414       | 339          | 63           | 12   | 7             |
| 1989 | 592       | 471          | 101          | 19   | 13            |
| 1990 | 845       | 663          | 153          | 30   | 22            |
| 1991 | 1208      | 940          | 223          | 44   | 36            |
| 1992 | 1724      | 1339         | 321          | 65   | 58            |
| 1993 | 2459      | 1906         | 458          | 94   | 89            |
| 1994 | 3498      | 2709         | 654          | 135  | 134           |
| 1995 | 4959      | 3835         | 932          | 192  | 199           |
| 1996 | 7026      | 5398         | 1371         | 256  | 269           |
| 1997 | 9894      | 7542         | 2010         | 343  | 354           |
| 1998 | 13825     | 10434        | 2933         | 458  | 456           |
| 1999 | 19123     | 14262        | 4255         | 606  | 575           |
| 2000 | 26126     | 19206        | 6130         | 790  | 711           |
| 2001 | 25619     | 15935        | 8675         | 1009 | 885           |
| 2002 | 25063     | 12353        | 11430        | 1280 | 1104          |
| 2003 | 24450     | 8971         | 13897        | 1582 | 1376          |
| 2004 | 23774     | 6150         | 15732        | 1893 | 1706          |
| 2005 | 23040     | 4056         | 16796        | 2188 | 2101          |
| 2006 | 22245     | 2644         | 17153        | 2448 | 2561          |
| 2007 | 21397     | 1712         | 17028        | 2657 | 3080          |
| 2008 | 20513     | 1101         | 16615        | 2798 | 3650          |
| 2009 | 19602     | 703          | 16021        | 2878 | 4258          |
| 2010 | 18679     | 447          | 15335        | 2898 | 4894          |
| 2011 | 17757     | 282          | 14605        | 2870 | 5546          |
| 2012 | 16841     | 177          | 13858        | 2806 | 6202          |
| 2013 | 15942     | 110          | 13116        | 2716 | 6853          |
| 2014 | 15068     | 69           | 12391        | 2609 | 7492          |
| 2015 | 14224     | 43           | 11691        | 2490 | 8111          |
| 2016 | 13413     | 26           | 11021        | 2366 | 8707          |

| Year | HIV/AIDS1 | HIV CD4 >500 | HIV CD4 <500 | AIDS | Total deaths2 |
|------|-----------|--------------|--------------|------|---------------|
| 2017 | 12639     | 16           | 10382        | 2241 | 9277          |
| 2018 | 11903     | 10           | 9776         | 2118 | 9818          |
| 2019 | 11202     | 6            | 9198         | 1998 | 10331         |
| 2020 | 10538     | 4            | 8651         | 1883 | 10816         |
| 2021 | 9907      | 2            | 8132         | 1773 | 11274         |
| 2022 | 9310      | 1            | 7641         | 1668 | 11705         |
| 2023 | 8745      | 1            | 7176         | 1568 | 12111         |
| 2024 | 8209      | 0            | 6735         | 1474 | 12493         |
| 2025 | 7702      | 0            | 6317         | 1385 | 12853         |
| 2026 | 7220      | 0            | 5920         | 1300 | 13190         |
| 2027 | 6764      | 0            | 5544         | 1219 | 13507         |
| 2028 | 6330      | 0            | 5187         | 1143 | 13805         |
| 2029 | 5919      | 0            | 4848         | 1071 | 14084         |
| 2030 | 5528      | 0            | 4525         | 1002 | 14346         |
| 2031 | 5157      | 0            | 4219         | 937  | 14591         |
| 2032 | 4805      | 0            | 3929         | 876  | 14821         |
| 2033 | 4471      | 0            | 3654         | 817  | 15036         |
| 2034 | 4153      | 0            | 3392         | 761  | 15236         |
| 2035 | 3852      | 0            | 3144         | 709  | 15423         |
| 2036 | 3566      | 0            | 2908         | 658  | 15597         |
| 2037 | 3294      | 0            | 2684         | 611  | 15759         |
| 2038 | 3037      | 0            | 2471         | 566  | 15910         |
| 2039 | 2793      | 0            | 2270         | 523  | 16050         |
| 2040 | 2561      | 0            | 2079         | 482  | 16179         |
| 2041 | 2342      | 0            | 1898         | 444  | 16298         |
| 2042 | 2134      | 0            | 1727         | 407  | 16409         |
| 2043 | 1938      | 0            | 1566         | 372  | 16510         |
| 2044 | 1753      | 0            | 1414         | 339  | 16603         |
| 2045 | 1578      | 0            | 1270         | 308  | 16688         |
| 2046 | 1414      | 0            | 1135         | 279  | 16766         |
| 2047 | 1261      | 0            | 1010         | 252  | 16836         |
| 2048 | 1118      | 0            | 892          | 226  | 16900         |
| 2049 | 985       | 0            | 783          | 202  | 16957         |
| 2050 | 861       | 0            | 682          | 179  | 17009         |
| 2051 | 747       | 0            | 589          | 158  | 17055         |
| 2052 | 643       | 0            | 504          | 138  | 17096         |
| 2053 | 548       | 0            | 427          | 120  | 17132         |

| Year | HIV/AIDS1 | HIV CD4 >500 | HIV CD4 <500 | AIDS | Total deaths2 |
|------|-----------|--------------|--------------|------|---------------|
| 2054 | 462       | 0            | 358          | 104  | 17164         |
| 2055 | 386       | 0            | 297          | 89   | 17192         |
| 2056 | 318       | 0            | 243          | 75   | 17216         |
| 2057 | 259       | 0            | 196          | 63   | 17236         |
| 2058 | 208       | 0            | 156          | 52   | 17254         |
| 2059 | 164       | 0            | 122          | 43   | 17268         |
| 2060 | 128       | 0            | 94           | 34   | 17281         |
| 2061 | 98        | 0            | 71           | 27   | 17291         |
| 2062 | 74        | 0            | 53           | 21   | 17299         |
| 2063 | 55        | 0            | 39           | 16   | 17306         |
| 2064 | 40        | 0            | 28           | 12   | 17311         |
| 2065 | 28        | 0            | 20           | 8    | 17315         |
| 2066 | 19        | 0            | 13           | 6    | 17319         |
| 2067 | 12        | 0            | 9            | 4    | 17321         |
| 2068 | 7         | 0            | 5            | 2    | 17323         |
| 2069 | 3         | 0            | 2            | 1    | 17324         |
| 2070 | 0         | 0            | 0            | 0    | 17325         |

1. HIV/AIDS=number of people living with either HIV (CD4>500+CD4<500) or AIDS
2. Total deaths=cumulative deaths

**Table 3.4.3 Estimated number of HIV/AIDS cases and deaths prevented through NSP introduction<sup>1</sup>**

| Year | HIV/AIDS <sup>2</sup> | HIV CD4>500 | HIV CD4<500 | AIDS | Total deaths <sup>3</sup> |
|------|-----------------------|-------------|-------------|------|---------------------------|
| 1981 | 0                     | 0           | 0           | 0    | 0                         |
| 1982 | 0                     | 0           | 0           | 0    | 0                         |
| 1983 | 0                     | 0           | 0           | 0    | 0                         |
| 1984 | 0                     | 0           | 0           | 0    | 0                         |
| 1985 | 0                     | 0           | 0           | 0    | 0                         |
| 1986 | 0                     | 0           | 0           | 0    | 0                         |
| 1987 | 0                     | 0           | 0           | 0    | 0                         |
| 1988 | 59                    | 59          | 0           | 0    | 0                         |
| 1989 | 183                   | 178         | 4           | 1    | 0                         |
| 1990 | 401                   | 379         | 18          | 4    | 1                         |
| 1991 | 742                   | 680         | 52          | 10   | 3                         |
| 1992 | 1250                  | 1109        | 118         | 23   | 9                         |
| 1993 | 1988                  | 1711        | 233         | 44   | 21                        |
| 1994 | 3033                  | 2541        | 414         | 78   | 44                        |
| 1995 | 4503                  | 3688        | 685         | 131  | 83                        |
| 1996 | 6573                  | 5266        | 1115        | 192  | 132                       |
| 1997 | 9445                  | 7419        | 1748        | 278  | 196                       |
| 1998 | 13376                 | 10318       | 2666        | 393  | 280                       |
| 1999 | 18674                 | 14150       | 3983        | 540  | 382                       |
| 2000 | 25673                 | 19096       | 5851        | 725  | 503                       |
| 2001 | 25186                 | 15851       | 8390        | 946  | 662                       |
| 2002 | 24650                 | 12291       | 11141       | 1219 | 866                       |
| 2003 | 24056                 | 8927        | 13608       | 1521 | 1124                      |
| 2004 | 23400                 | 6120        | 15446       | 1834 | 1439                      |
| 2005 | 22684                 | 4037        | 16517       | 2130 | 1820                      |
| 2006 | 21908                 | 2631        | 16884       | 2392 | 2266                      |
| 2007 | 21077                 | 1704        | 16771       | 2602 | 2772                      |
| 2008 | 20211                 | 1095        | 16370       | 2746 | 3329                      |
| 2009 | 19316                 | 700         | 15788       | 2828 | 3925                      |
| 2010 | 18409                 | 445         | 15115       | 2849 | 4549                      |
| 2011 | 17502                 | 281         | 14397       | 2824 | 5189                      |
| 2012 | 16600                 | 176         | 13662       | 2762 | 5834                      |
| 2013 | 15715                 | 110         | 12932       | 2674 | 6474                      |
| 2014 | 14854                 | 68          | 12217       | 2569 | 7103                      |
| 2015 | 14023                 | 43          | 11528       | 2453 | 7712                      |
| 2016 | 13225                 | 26          | 10868       | 2331 | 8299                      |

| Year | HIV/AIDS <sup>2</sup> | HIV CD4>500 | HIV CD4<500 | AIDS | Total deaths <sup>3</sup> |
|------|-----------------------|-------------|-------------|------|---------------------------|
| 2017 | 12462                 | 16          | 10238       | 2208 | 8860                      |
| 2018 | 11737                 | 10          | 9641        | 2086 | 9394                      |
| 2019 | 11046                 | 6           | 9072        | 1968 | 9899                      |
| 2020 | 10391                 | 4           | 8532        | 1855 | 10377                     |
| 2021 | 9770                  | 2           | 8021        | 1747 | 10828                     |
| 2022 | 9182                  | 1           | 7537        | 1644 | 11253                     |
| 2023 | 8625                  | 1           | 7079        | 1546 | 11653                     |
| 2024 | 8097                  | 0           | 6645        | 1453 | 12029                     |
| 2025 | 7597                  | 0           | 6233        | 1365 | 12383                     |
| 2026 | 7123                  | 0           | 5842        | 1281 | 12716                     |
| 2027 | 6674                  | 0           | 5472        | 1202 | 13029                     |
| 2028 | 6247                  | 0           | 5120        | 1127 | 13322                     |
| 2029 | 5841                  | 0           | 4785        | 1056 | 13598                     |
| 2030 | 5456                  | 0           | 4468        | 988  | 13856                     |
| 2031 | 5091                  | 0           | 4166        | 924  | 14098                     |
| 2032 | 4744                  | 0           | 3880        | 864  | 14324                     |
| 2033 | 4415                  | 0           | 3609        | 806  | 14536                     |
| 2034 | 4102                  | 0           | 3351        | 751  | 14733                     |
| 2035 | 3805                  | 0           | 3106        | 699  | 14918                     |
| 2036 | 3524                  | 0           | 2874        | 650  | 15090                     |
| 2037 | 3256                  | 0           | 2653        | 603  | 15250                     |
| 2038 | 3001                  | 0           | 2443        | 558  | 15398                     |
| 2039 | 2761                  | 0           | 2245        | 516  | 15536                     |
| 2040 | 2533                  | 0           | 2057        | 476  | 15664                     |
| 2041 | 2316                  | 0           | 1878        | 438  | 15782                     |
| 2042 | 2112                  | 0           | 1710        | 402  | 15891                     |
| 2043 | 1918                  | 0           | 1550        | 368  | 15991                     |
| 2044 | 1735                  | 0           | 1400        | 336  | 16083                     |
| 2045 | 1563                  | 0           | 1258        | 305  | 16167                     |
| 2046 | 1401                  | 0           | 1125        | 276  | 16244                     |
| 2047 | 1250                  | 0           | 1001        | 249  | 16314                     |
| 2048 | 1108                  | 0           | 885         | 224  | 16377                     |
| 2049 | 976                   | 0           | 777         | 200  | 16434                     |
| 2050 | 854                   | 0           | 677         | 178  | 16485                     |
| 2051 | 741                   | 0           | 585         | 157  | 16530                     |
| 2052 | 638                   | 0           | 501         | 137  | 16571                     |
| 2053 | 544                   | 0           | 424         | 119  | 16607                     |



| Year | HIV/AIDS <sup>2</sup> | HIV CD4>500 | HIV CD4<500 | AIDS | Total deaths <sup>3</sup> |
|------|-----------------------|-------------|-------------|------|---------------------------|
| 2054 | 459                   | 0           | 356         | 103  | 16638                     |
| 2055 | 383                   | 0           | 295         | 88   | 16666                     |
| 2056 | 316                   | 0           | 241         | 75   | 16690                     |
| 2057 | 257                   | 0           | 195         | 63   | 16710                     |
| 2058 | 207                   | 0           | 155         | 52   | 16727                     |
| 2059 | 163                   | 0           | 121         | 42   | 16742                     |
| 2060 | 127                   | 0           | 93          | 34   | 16754                     |
| 2061 | 97                    | 0           | 70          | 27   | 16764                     |
| 2062 | 73                    | 0           | 52          | 21   | 16772                     |
| 2063 | 55                    | 0           | 39          | 16   | 16779                     |
| 2064 | 40                    | 0           | 28          | 12   | 16784                     |
| 2065 | 28                    | 0           | 20          | 8    | 16788                     |
| 2066 | 19                    | 0           | 13          | 6    | 16792                     |
| 2067 | 13                    | 0           | 9           | 4    | 16794                     |
| 2068 | 8                     | 0           | 6           | 2    | 16796                     |
| 2069 | 3                     | 0           | 2           | 1    | 16798                     |
| 2070 | 0                     | 0           | 0           | 0    | 16799                     |

1. NSP introduction in 1988
2. HIV/AIDS=number of people living with either HIV (CD4>500+CD4<500) or AIDS
3. Total deaths=cumulative deaths

**Table 3.4.5 Estimated number of HIV/AIDS cases prevented through NSP introduction<sup>1</sup> by disease stage and diagnosis category<sup>2</sup>**

| Year | HIV/AIDS <sup>3</sup> | CD4 >500<br>(diagnosed) | CD4 >500<br>(undiagnosed) | CD4 <500<br>(diagnosed) | CD4 <500<br>(undiagnosed) | AIDS |
|------|-----------------------|-------------------------|---------------------------|-------------------------|---------------------------|------|
| 1981 | 0                     | 0                       | 0                         | 0                       | 0                         | 0    |
| 1982 | 0                     | 0                       | 0                         | 0                       | 0                         | 0    |
| 1983 | 0                     | 0                       | 0                         | 0                       | 0                         | 0    |
| 1984 | 0                     | 0                       | 0                         | 0                       | 0                         | 0    |
| 1985 | 0                     | 0                       | 0                         | 0                       | 0                         | 0    |
| 1986 | 0                     | 0                       | 0                         | 0                       | 0                         | 0    |
| 1987 | 0                     | 0                       | 0                         | 0                       | 0                         | 0    |
| 1988 | 59                    | 47                      | 12                        | 0                       | 0                         | 0    |
| 1989 | 183                   | 142                     | 36                        | 4                       | 0                         | 1    |
| 1990 | 401                   | 303                     | 76                        | 16                      | 2                         | 4    |
| 1991 | 742                   | 544                     | 136                       | 47                      | 5                         | 10   |
| 1992 | 1250                  | 887                     | 222                       | 107                     | 12                        | 23   |
| 1993 | 1988                  | 1369                    | 342                       | 210                     | 23                        | 44   |
| 1994 | 3033                  | 2033                    | 508                       | 373                     | 41                        | 78   |
| 1995 | 4503                  | 2950                    | 738                       | 616                     | 68                        | 131  |
| 1996 | 6573                  | 4213                    | 1053                      | 1004                    | 112                       | 192  |
| 1997 | 9445                  | 5935                    | 1484                      | 1573                    | 175                       | 278  |
| 1998 | 13376                 | 8255                    | 2064                      | 2399                    | 267                       | 393  |
| 1999 | 18674                 | 11320                   | 2830                      | 3585                    | 398                       | 540  |
| 2000 | 25673                 | 15277                   | 3819                      | 5266                    | 585                       | 725  |
| 2001 | 25186                 | 12681                   | 3170                      | 7551                    | 839                       | 946  |
| 2002 | 24650                 | 9833                    | 2458                      | 10027                   | 1114                      | 1219 |
| 2003 | 24056                 | 7142                    | 1785                      | 12247                   | 1361                      | 1521 |
| 2004 | 23400                 | 4896                    | 1224                      | 13901                   | 1545                      | 1834 |
| 2005 | 22684                 | 3230                    | 807                       | 14865                   | 1652                      | 2130 |
| 2006 | 21908                 | 2105                    | 526                       | 15196                   | 1688                      | 2392 |
| 2007 | 21077                 | 1363                    | 341                       | 15094                   | 1677                      | 2602 |
| 2008 | 20211                 | 876                     | 219                       | 14733                   | 1637                      | 2746 |
| 2009 | 19316                 | 560                     | 140                       | 14210                   | 1579                      | 2828 |
| 2010 | 18409                 | 356                     | 89                        | 13603                   | 1511                      | 2849 |
| 2011 | 17502                 | 225                     | 56                        | 12958                   | 1440                      | 2824 |
| 2012 | 16600                 | 141                     | 35                        | 12296                   | 1366                      | 2762 |
| 2013 | 15715                 | 88                      | 22                        | 11638                   | 1293                      | 2674 |
| 2014 | 14854                 | 55                      | 14                        | 10996                   | 1222                      | 2569 |
| 2015 | 14023                 | 34                      | 9                         | 10375                   | 1153                      | 2453 |

| Year | HIV/AIDS <sup>3</sup> | CD4 >500<br>(diagnosed) | CD4 >500<br>(undiagnosed) | CD4 <500<br>(diagnosed) | CD4 <500<br>(undiagnosed) | AIDS |
|------|-----------------------|-------------------------|---------------------------|-------------------------|---------------------------|------|
| 2016 | 13225                 | 21                      | 5                         | 9781                    | 1087                      | 2331 |
| 2017 | 12462                 | 13                      | 3                         | 9214                    | 1024                      | 2208 |
| 2018 | 11737                 | 8                       | 2                         | 8677                    | 964                       | 2086 |
| 2019 | 11046                 | 5                       | 1                         | 8165                    | 907                       | 1968 |
| 2020 | 10391                 | 3                       | 1                         | 7679                    | 853                       | 1855 |
| 2021 | 9770                  | 2                       | 0                         | 7219                    | 802                       | 1747 |
| 2022 | 9182                  | 1                       | 0                         | 6784                    | 754                       | 1644 |
| 2023 | 8625                  | 1                       | 0                         | 6371                    | 708                       | 1546 |
| 2024 | 8097                  | 0                       | 0                         | 5980                    | 664                       | 1453 |
| 2025 | 7597                  | 0                       | 0                         | 5610                    | 623                       | 1365 |
| 2026 | 7123                  | 0                       | 0                         | 5258                    | 584                       | 1281 |
| 2027 | 6674                  | 0                       | 0                         | 4925                    | 547                       | 1202 |
| 2028 | 6247                  | 0                       | 0                         | 4608                    | 512                       | 1127 |
| 2029 | 5841                  | 0                       | 0                         | 4307                    | 479                       | 1056 |
| 2030 | 5456                  | 0                       | 0                         | 4021                    | 447                       | 988  |
| 2031 | 5091                  | 0                       | 0                         | 3750                    | 417                       | 924  |
| 2032 | 4744                  | 0                       | 0                         | 3492                    | 388                       | 864  |
| 2033 | 4415                  | 0                       | 0                         | 3248                    | 361                       | 806  |
| 2034 | 4102                  | 0                       | 0                         | 3016                    | 335                       | 751  |
| 2035 | 3805                  | 0                       | 0                         | 2796                    | 311                       | 699  |
| 2036 | 3524                  | 0                       | 0                         | 2587                    | 287                       | 650  |
| 2037 | 3256                  | 0                       | 0                         | 2388                    | 265                       | 603  |
| 2038 | 3001                  | 0                       | 0                         | 2199                    | 244                       | 558  |
| 2039 | 2761                  | 0                       | 0                         | 2021                    | 225                       | 516  |
| 2040 | 2533                  | 0                       | 0                         | 1851                    | 206                       | 476  |
| 2041 | 2316                  | 0                       | 0                         | 1690                    | 188                       | 438  |
| 2042 | 2112                  | 0                       | 0                         | 1539                    | 171                       | 402  |
| 2043 | 1918                  | 0                       | 0                         | 1395                    | 155                       | 368  |
| 2044 | 1735                  | 0                       | 0                         | 1260                    | 140                       | 336  |
| 2045 | 1563                  | 0                       | 0                         | 1132                    | 126                       | 305  |
| 2046 | 1401                  | 0                       | 0                         | 1013                    | 113                       | 276  |
| 2047 | 1250                  | 0                       | 0                         | 901                     | 100                       | 249  |
| 2048 | 1108                  | 0                       | 0                         | 796                     | 88                        | 224  |
| 2049 | 976                   | 0                       | 0                         | 699                     | 78                        | 200  |
| 2050 | 854                   | 0                       | 0                         | 609                     | 68                        | 178  |
| 2051 | 741                   | 0                       | 0                         | 526                     | 58                        | 157  |
| 2052 | 638                   | 0                       | 0                         | 451                     | 50                        | 137  |

| Year | HIV/AIDS <sup>3</sup> | CD4 >500<br>(diagnosed) | CD4 >500<br>(undiagnosed) | CD4 <500<br>(diagnosed) | CD4 <500<br>(undiagnosed) | AIDS |
|------|-----------------------|-------------------------|---------------------------|-------------------------|---------------------------|------|
| 2053 | 544                   | 0                       | 0                         | 382                     | 42                        | 119  |
| 2054 | 459                   | 0                       | 0                         | 320                     | 36                        | 103  |
| 2055 | 383                   | 0                       | 0                         | 265                     | 29                        | 88   |
| 2056 | 316                   | 0                       | 0                         | 217                     | 24                        | 75   |
| 2057 | 257                   | 0                       | 0                         | 175                     | 19                        | 63   |
| 2058 | 207                   | 0                       | 0                         | 139                     | 15                        | 52   |
| 2059 | 163                   | 0                       | 0                         | 109                     | 12                        | 42   |
| 2060 | 127                   | 0                       | 0                         | 84                      | 9                         | 34   |
| 2061 | 98                    | 0                       | 0                         | 63                      | 7                         | 27   |
| 2062 | 74                    | 0                       | 0                         | 47                      | 5                         | 21   |
| 2063 | 54                    | 0                       | 0                         | 35                      | 4                         | 16   |
| 2064 | 40                    | 0                       | 0                         | 25                      | 3                         | 12   |
| 2065 | 28                    | 0                       | 0                         | 18                      | 2                         | 8    |
| 2066 | 19                    | 0                       | 0                         | 12                      | 1                         | 6    |
| 2067 | 12                    | 0                       | 0                         | 8                       | 1                         | 4    |
| 2068 | 7                     | 0                       | 0                         | 5                       | 1                         | 2    |
| 2069 | 3                     | 0                       | 0                         | 2                       | 0                         | 1    |
| 2070 | 0                     | 0                       | 0                         | 0                       | 0                         | 0    |

1. NSP introduction in 1988
2. Proportions diagnosed are 80% for CD4>500, 90% for CD4<500, and 100% for AIDS.
3. HIV/AIDS=number of people living with either HIV (CD4>500+CD4<500) or AIDS

Table 3.5.1 Estimates of people living with HCV by disease stage and HCV-related deaths with NSPs

| Year | Total living with HCV | Total chronic | Total 0/1 | Total 2/3 | Total cirrhosis | HCC incidence | Liver failure incidence | Total deaths | HCV deaths | Other deaths |
|------|-----------------------|---------------|-----------|-----------|-----------------|---------------|-------------------------|--------------|------------|--------------|
| 1961 | 917                   | 688           | 674       | 14        | 0               | 0             | 0                       | 0            | 0          | 0            |
| 1962 | 2123                  | 1592          | 1547      | 45        | 0               | 0             | 0                       | 1            | 1          | 0            |
| 1963 | 3578                  | 2683          | 2586      | 96        | 1               | 0             | 0                       | 2            | 2          | 1            |
| 1964 | 5251                  | 3938          | 3765      | 169       | 3               | 0             | 0                       | 4            | 3          | 1            |
| 1965 | 7117                  | 5338          | 5064      | 266       | 7               | 0             | 0                       | 6            | 5          | 2            |
| 1966 | 9157                  | 6868          | 6466      | 389       | 13              | 0             | 1                       | 9            | 7          | 2            |
| 1967 | 11355                 | 8516          | 7958      | 537       | 22              | 0             | 1                       | 13           | 10         | 3            |
| 1968 | 13697                 | 10273         | 9528      | 711       | 34              | 0             | 1                       | 18           | 13         | 4            |
| 1969 | 16174                 | 12131         | 11168     | 913       | 49              | 0             | 2                       | 23           | 17         | 6            |
| 1970 | 18778                 | 14083         | 12872     | 1142      | 69              | 1             | 3                       | 30           | 22         | 7            |
| 1971 | 21434                 | 16076         | 14584     | 1398      | 94              | 1             | 3                       | 37           | 28         | 9            |
| 1972 | 24166                 | 18125         | 16321     | 1679      | 124             | 1             | 4                       | 45           | 34         | 11           |
| 1973 | 26997                 | 20248         | 18100     | 1987      | 161             | 2             | 6                       | 55           | 41         | 14           |
| 1974 | 29949                 | 22462         | 19938     | 2321      | 203             | 2             | 7                       | 65           | 49         | 16           |
| 1975 | 35723                 | 26792         | 23818     | 2721      | 253             | 2             | 9                       | 78           | 59         | 20           |
| 1976 | 38952                 | 29214         | 25757     | 3148      | 310             | 3             | 11                      | 93           | 70         | 23           |
| 1977 | 42373                 | 31780         | 27803     | 3602      | 375             | 4             | 13                      | 111          | 83         | 28           |
| 1978 | 46021                 | 34516         | 29980     | 4087      | 448             | 4             | 16                      | 130          | 98         | 33           |
| 1979 | 49918                 | 37439         | 32302     | 4605      | 532             | 5             | 19                      | 152          | 114        | 38           |
| 1980 | 54085                 | 40564         | 34781     | 5157      | 626             | 6             | 22                      | 175          | 131        | 44           |
| 1981 | 58545                 | 43909         | 37432     | 5747      | 730             | 7             | 25                      | 201          | 151        | 50           |
| 1982 | 63324                 | 47493         | 40269     | 6377      | 847             | 8             | 29                      | 229          | 172        | 57           |
| 1983 | 68445                 | 51334         | 43307     | 7050      | 977             | 10            | 34                      | 260          | 195        | 65           |

| Year | Total living with HCV | Total chronic | Total 0/1 | Total 2/3 | Total cirrhosis | HCC incidence | Liver failure incidence | Total deaths | HCV deaths | Other deaths |
|------|-----------------------|---------------|-----------|-----------|-----------------|---------------|-------------------------|--------------|------------|--------------|
| 1984 | 73882                 | 55412         | 46524     | 7768      | 1120            | 11            | 39                      | 293          | 220        | 73           |
| 1985 | 79301                 | 59476         | 49670     | 8529      | 1277            | 13            | 44                      | 328          | 246        | 82           |
| 1986 | 84716                 | 63537         | 52757     | 9330      | 1451            | 14            | 50                      | 366          | 275        | 92           |
| 1987 | 90126                 | 67594         | 55787     | 10167     | 1640            | 16            | 57                      | 406          | 305        | 102          |
| 1988 | 95579                 | 71684         | 58796     | 11041     | 1846            | 18            | 64                      | 449          | 337        | 112          |
| 1989 | 101056                | 75792         | 61773     | 11949     | 2070            | 20            | 71                      | 495          | 371        | 124          |
| 1990 | 106596                | 79947         | 64746     | 12889     | 2313            | 23            | 79                      | 543          | 407        | 136          |
| 1991 | 112730                | 84548         | 68101     | 13873     | 2573            | 25            | 88                      | 594          | 445        | 148          |
| 1992 | 119459                | 89594         | 71837     | 14904     | 2854            | 28            | 98                      | 648          | 486        | 162          |
| 1993 | 126815                | 95111         | 75970     | 15986     | 3154            | 31            | 108                     | 706          | 530        | 177          |
| 1994 | 134836                | 101127        | 80522     | 17129     | 3476            | 34            | 119                     | 769          | 576        | 192          |
| 1995 | 143566                | 107674        | 85517     | 18337     | 3820            | 38            | 130                     | 835          | 626        | 209          |
| 1996 | 153049                | 114787        | 90979     | 19620     | 4188            | 41            | 143                     | 907          | 680        | 227          |
| 1997 | 163338                | 122504        | 96940     | 20983     | 4580            | 45            | 156                     | 983          | 738        | 246          |
| 1998 | 174493                | 130870        | 103435    | 22436     | 4999            | 49            | 170                     | 1066         | 799        | 266          |
| 1999 | 186573                | 139930        | 110498    | 23986     | 5445            | 54            | 185                     | 1155         | 866        | 289          |
| 2000 | 199649                | 149737        | 118172    | 25644     | 5922            | 58            | 201                     | 1251         | 938        | 313          |
| 2001 | 197976                | 148482        | 114874    | 27179     | 6429            | 63            | 218                     | 1349         | 1012       | 337          |
| 2002 | 196338                | 147254        | 111691    | 28599     | 6964            | 68            | 236                     | 1450         | 1088       | 363          |
| 2003 | 194737                | 146053        | 108619    | 29909     | 7524            | 74            | 255                     | 1555         | 1166       | 389          |
| 2004 | 193162                | 144871        | 105651    | 31115     | 8105            | 80            | 274                     | 1665         | 1249       | 416          |
| 2005 | 191611                | 143708        | 102782    | 32222     | 8704            | 86            | 294                     | 1779         | 1334       | 445          |
| 2006 | 190084                | 142563        | 100010    | 33235     | 9318            | 92            | 315                     | 1900         | 1425       | 475          |
| 2007 | 188586                | 141440        | 97335     | 34160     | 9944            | 98            | 335                     | 2027         | 1520       | 507          |

| Year | Total living with HCV | Total chronic | Total 0/1 | Total 2/3 | Total cirrhosis | HCC incidence | Liver failure incidence | Total deaths | HCV deaths | Other deaths |
|------|-----------------------|---------------|-----------|-----------|-----------------|---------------|-------------------------|--------------|------------|--------------|
| 2008 | 187112                | 140334        | 94753     | 35000     | 10580           | 104           | 356                     | 2162         | 1622       | 541          |
| 2009 | 185657                | 139243        | 92258     | 35761     | 11223           | 110           | 377                     | 2305         | 1729       | 576          |
| 2010 | 184234                | 138175        | 89857     | 36448     | 11870           | 117           | 399                     | 2457         | 1843       | 614          |
| 2011 | 182834                | 137126        | 87542     | 37064     | 12520           | 123           | 420                     | 2618         | 1964       | 655          |
| 2012 | 181453                | 136090        | 85309     | 37612     | 13169           | 129           | 441                     | 2790         | 2093       | 698          |
| 2013 | 180104                | 135078        | 83164     | 38099     | 13815           | 136           | 462                     | 2974         | 2231       | 744          |
| 2014 | 178778                | 134083        | 81101     | 38526     | 14456           | 142           | 483                     | 3170         | 2378       | 793          |
| 2015 | 177480                | 133110        | 79121     | 38899     | 15090           | 148           | 504                     | 3379         | 2534       | 845          |
| 2016 | 176216                | 132162        | 77225     | 39221     | 15715           | 154           | 524                     | 3602         | 2702       | 901          |
| 2017 | 174841                | 131131        | 75336     | 39470     | 16324           | 160           | 544                     | 3845         | 2884       | 961          |
| 2018 | 173353                | 130015        | 73454     | 39646     | 16914           | 166           | 563                     | 4109         | 3082       | 1027         |
| 2019 | 171753                | 128815        | 71580     | 39753     | 17482           | 172           | 581                     | 4396         | 3297       | 1099         |
| 2020 | 170028                | 127521        | 69710     | 39788     | 18023           | 177           | 598                     | 4707         | 3530       | 1177         |
| 2021 | 168171                | 126128        | 67841     | 39751     | 18536           | 182           | 615                     | 5045         | 3783       | 1261         |
| 2022 | 166182                | 124637        | 65974     | 39645     | 19017           | 187           | 630                     | 5409         | 4057       | 1352         |
| 2023 | 164057                | 123043        | 64109     | 39470     | 19463           | 191           | 644                     | 5803         | 4352       | 1451         |
| 2024 | 161786                | 121339        | 62243     | 39224     | 19872           | 195           | 657                     | 6228         | 4655       | 1572         |
| 2025 | 159370                | 119528        | 60375     | 38911     | 20241           | 199           | 668                     | 6683         | 4963       | 1720         |
| 2026 | 156804                | 117603        | 58506     | 38529     | 20568           | 202           | 678                     | 7171         | 5276       | 1895         |
| 2027 | 154094                | 115571        | 56638     | 38083     | 20850           | 205           | 687                     | 7692         | 5594       | 2098         |
| 2028 | 151236                | 113427        | 54768     | 37572     | 21087           | 207           | 694                     | 8246         | 5915       | 2331         |
| 2029 | 148229                | 111172        | 52897     | 36998     | 21276           | 209           | 699                     | 8834         | 6239       | 2595         |
| 2030 | 145079                | 108809        | 51028     | 36364     | 21417           | 210           | 703                     | 9455         | 6565       | 2889         |
| 2031 | 141783                | 106337        | 49159     | 35670     | 21508           | 211           | 705                     | 10109        | 6893       | 3217         |

| Year | Total living with HCV | Total chronic | Total 0/1 | Total 2/3 | Total cirrhosis | HCC incidence | Liver failure incidence | Total deaths | HCV deaths | Other deaths |
|------|-----------------------|---------------|-----------|-----------|-----------------|---------------|-------------------------|--------------|------------|--------------|
| 2032 | 138349                | 103762        | 47293     | 34921     | 21548           | 211           | 706                     | 10797        | 7221       | 3576         |
| 2033 | 134776                | 101082        | 45429     | 34116     | 21537           | 211           | 704                     | 11518        | 7549       | 3969         |
| 2034 | 131069                | 98302         | 43569     | 33259     | 21474           | 211           | 701                     | 12271        | 7876       | 4395         |
| 2035 | 127234                | 95426         | 41714     | 32353     | 21358           | 209           | 697                     | 13057        | 8201       | 4856         |
| 2036 | 123274                | 92455         | 39868     | 31400     | 21187           | 208           | 690                     | 13876        | 8524       | 5353         |
| 2037 | 119200                | 89400         | 38031     | 30405     | 20964           | 205           | 682                     | 14727        | 8843       | 5884         |
| 2038 | 115016                | 86262         | 36206     | 29370     | 20687           | 203           | 672                     | 15608        | 9158       | 6449         |
| 2039 | 110735                | 83051         | 34395     | 28299     | 20358           | 199           | 661                     | 16517        | 9468       | 7049         |
| 2040 | 106361                | 79771         | 32600     | 27195     | 19976           | 196           | 647                     | 17456        | 9772       | 7683         |
| 2041 | 101902                | 76426         | 30822     | 26062     | 19542           | 191           | 632                     | 18422        | 10070      | 8352         |
| 2042 | 97365                 | 73024         | 29064     | 24903     | 19056           | 187           | 615                     | 19415        | 10360      | 9055         |
| 2043 | 92765                 | 69574         | 27330     | 23723     | 18521           | 181           | 597                     | 20432        | 10642      | 9790         |
| 2044 | 88124                 | 66093         | 25625     | 22528     | 17939           | 176           | 577                     | 21471        | 10915      | 10555        |
| 2045 | 83434                 | 62576         | 23947     | 21319     | 17310           | 170           | 556                     | 22531        | 11179      | 11352        |
| 2046 | 78714                 | 59036         | 22299     | 20099     | 16637           | 163           | 533                     | 23610        | 11432      | 12177        |
| 2047 | 73984                 | 55488         | 20688     | 18876     | 15924           | 156           | 509                     | 24703        | 11675      | 13028        |
| 2048 | 69251                 | 51938         | 19114     | 17650     | 15173           | 149           | 484                     | 25808        | 11906      | 13902        |
| 2049 | 64538                 | 48404         | 17583     | 16431     | 14389           | 141           | 458                     | 26921        | 12125      | 14796        |
| 2050 | 59827                 | 44871         | 16091     | 15204     | 13575           | 133           | 430                     | 28039        | 12332      | 15707        |
| 2051 | 55203                 | 41402         | 14655     | 14010     | 12737           | 125           | 403                     | 29156        | 12526      | 16631        |
| 2052 | 50653                 | 37990         | 13273     | 12836     | 11881           | 116           | 374                     | 30268        | 12707      | 17561        |
| 2053 | 46191                 | 34643         | 11947     | 11685     | 11011           | 108           | 346                     | 31369        | 12874      | 18495        |
| 2054 | 41835                 | 31376         | 10679     | 10564     | 10133           | 99            | 317                     | 32456        | 13029      | 19427        |
| 2055 | 37609                 | 28207         | 9475      | 9477      | 9254            | 90            | 288                     | 33522        | 13170      | 20353        |



| Year | Total living with HCV | Total chronic | Total 0/1 | Total 2/3 | Total cirrhosis | HCC incidence | Liver failure incidence | Total deaths | HCV deaths | Other deaths |
|------|-----------------------|---------------|-----------|-----------|-----------------|---------------|-------------------------|--------------|------------|--------------|
| 2056 | 33539                 | 25154         | 8339      | 8433      | 8382            | 82            | 259                     | 34561        | 13297      | 21264        |
| 2057 | 29649                 | 22237         | 7276      | 7438      | 7524            | 74            | 231                     | 35565        | 13412      | 22153        |
| 2058 | 25957                 | 19468         | 6286      | 6495      | 6687            | 65            | 204                     | 36529        | 13514      | 23015        |
| 2059 | 22487                 | 16865         | 5374      | 5612      | 5880            | 57            | 178                     | 37446        | 13603      | 23843        |
| 2060 | 19265                 | 14449         | 4543      | 4794      | 5112            | 50            | 154                     | 38307        | 13681      | 24626        |
| 2061 | 16307                 | 12230         | 3794      | 4046      | 4390            | 43            | 131                     | 39107        | 13748      | 25360        |
| 2062 | 13621                 | 10215         | 3127      | 3369      | 3720            | 36            | 110                     | 39843        | 13804      | 26039        |
| 2063 | 11216                 | 8412          | 2540      | 2765      | 3107            | 30            | 91                      | 40509        | 13852      | 26658        |
| 2064 | 9101                  | 6826          | 2034      | 2236      | 2556            | 25            | 74                      | 41103        | 13891      | 27212        |
| 2065 | 7264                  | 5448          | 1601      | 1778      | 2068            | 20            | 59                      | 41625        | 13922      | 27703        |
| 2066 | 5699                  | 4274          | 1239      | 1390      | 1645            | 16            | 46                      | 42075        | 13947      | 28128        |
| 2067 | 4393                  | 3295          | 943       | 1068      | 1284            | 12            | 35                      | 42456        | 13967      | 28489        |
| 2068 | 3316                  | 2487          | 702       | 803       | 982             | 10            | 26                      | 42774        | 13982      | 28792        |
| 2069 | 2451                  | 1838          | 513       | 591       | 734             | 7             | 19                      | 43033        | 13993      | 29040        |
| 2070 | 1759                  | 1319          | 363       | 423       | 533             | 5             | 13                      | 43242        | 14001      | 29241        |
| 2071 | 1205                  | 904           | 246       | 289       | 369             | 4             | 9                       | 43411        | 14007      | 29405        |
| 2072 | 776                   | 582           | 157       | 185       | 240             | 2             | 5                       | 43544        | 14010      | 29533        |
| 2073 | 447                   | 335           | 89        | 106       | 140             | 1             | 3                       | 43646        | 14012      | 29634        |
| 2074 | 197                   | 147           | 39        | 47        | 62              | 1             | 0                       | 43725        | 14013      | 29712        |
| 2075 | 0                     | 0             | 0         | 0         | 0               | 0             | 0                       | 43787        | 14013      | 29773        |

Note: Deaths are cumulative following cirrhosis

Table 3 5.2 Estimates of people living with HCV by disease stage and HCV-related deaths without NSP introduction

| Year | Total living with HCV | Total chronic | Total 0/1 | Total 2/3 | Total cirrhosis | HCC incidence | Liver failure incidence | Total deaths | HCV deaths | Other deaths |
|------|-----------------------|---------------|-----------|-----------|-----------------|---------------|-------------------------|--------------|------------|--------------|
| 1961 | 917                   | 688           | 674       | 14        | 0               | 0             | 0                       | 0            | 0          | 0            |
| 1962 | 2123                  | 1592          | 1547      | 45        | 0               | 0             | 0                       | 1            | 1          | 0            |
| 1963 | 3578                  | 2683          | 2586      | 96        | 1               | 0             | 0                       | 2            | 2          | 1            |
| 1964 | 5251                  | 3938          | 3765      | 169       | 3               | 0             | 0                       | 4            | 3          | 1            |
| 1965 | 7117                  | 5338          | 5064      | 266       | 7               | 0             | 0                       | 6            | 5          | 2            |
| 1966 | 9157                  | 6868          | 6466      | 389       | 13              | 0             | 1                       | 9            | 7          | 2            |
| 1967 | 11355                 | 8516          | 7958      | 537       | 22              | 0             | 1                       | 13           | 10         | 3            |
| 1968 | 13697                 | 10273         | 9528      | 711       | 34              | 0             | 1                       | 18           | 13         | 4            |
| 1969 | 16174                 | 12131         | 11168     | 913       | 49              | 0             | 2                       | 23           | 17         | 6            |
| 1970 | 18778                 | 14083         | 12872     | 1142      | 69              | 1             | 3                       | 30           | 22         | 7            |
| 1971 | 21434                 | 16076         | 14584     | 1398      | 94              | 1             | 3                       | 37           | 28         | 9            |
| 1972 | 24166                 | 18125         | 16321     | 1679      | 124             | 1             | 4                       | 45           | 34         | 11           |
| 1973 | 26997                 | 20248         | 18100     | 1987      | 161             | 2             | 6                       | 55           | 41         | 14           |
| 1974 | 29949                 | 22462         | 19938     | 2321      | 203             | 2             | 7                       | 65           | 49         | 16           |
| 1975 | 35723                 | 26792         | 23818     | 2721      | 253             | 2             | 9                       | 78           | 59         | 20           |
| 1976 | 38952                 | 29214         | 25757     | 3148      | 310             | 3             | 11                      | 93           | 70         | 23           |
| 1977 | 42373                 | 31780         | 27803     | 3602      | 375             | 4             | 13                      | 111          | 83         | 28           |
| 1978 | 46021                 | 34516         | 29980     | 4087      | 448             | 4             | 16                      | 130          | 98         | 33           |
| 1979 | 49918                 | 37439         | 32302     | 4605      | 532             | 5             | 19                      | 152          | 114        | 38           |
| 1980 | 54085                 | 40564         | 34781     | 5157      | 626             | 6             | 22                      | 175          | 131        | 44           |
| 1981 | 58545                 | 43909         | 37432     | 5747      | 730             | 7             | 25                      | 201          | 151        | 50           |
| 1982 | 63324                 | 47493         | 40269     | 6377      | 847             | 8             | 29                      | 229          | 172        | 57           |
| 1983 | 68445                 | 51334         | 43307     | 7050      | 977             | 10            | 34                      | 260          | 195        | 65           |

| Year | Total living with HCV | Total chronic | Total 0/1 | Total 2/3 | Total cirrhosis | HCC incidence | Liver failure incidence | Total deaths | HCV deaths | Other deaths |
|------|-----------------------|---------------|-----------|-----------|-----------------|---------------|-------------------------|--------------|------------|--------------|
| 1984 | 73882                 | 55412         | 46524     | 7768      | 1120            | 11            | 39                      | 293          | 220        | 73           |
| 1985 | 79301                 | 59476         | 49670     | 8529      | 1277            | 13            | 44                      | 328          | 246        | 82           |
| 1986 | 84716                 | 63537         | 52757     | 9330      | 1451            | 14            | 50                      | 366          | 275        | 92           |
| 1987 | 90126                 | 67594         | 55787     | 10167     | 1640            | 16            | 57                      | 406          | 305        | 102          |
| 1988 | 96588                 | 72441         | 59538     | 11056     | 1846            | 18            | 64                      | 450          | 337        | 112          |
| 1989 | 103463                | 77597         | 63527     | 11999     | 2071            | 20            | 71                      | 496          | 372        | 124          |
| 1990 | 110395                | 82796         | 67489     | 12993     | 2314            | 23            | 79                      | 545          | 409        | 136          |
| 1991 | 117933                | 88449         | 71822     | 14050     | 2577            | 25            | 88                      | 598          | 448        | 150          |
| 1992 | 126094                | 94571         | 76539     | 15170     | 2862            | 28            | 98                      | 655          | 491        | 164          |
| 1993 | 134927                | 101196        | 81668     | 16359     | 3168            | 31            | 108                     | 716          | 536        | 179          |
| 1994 | 144484                | 108363        | 87240     | 17625     | 3498            | 34            | 119                     | 781          | 585        | 196          |
| 1995 | 154819                | 116115        | 93288     | 18974     | 3853            | 38            | 131                     | 851          | 638        | 213          |
| 1996 | 165994                | 124496        | 99847     | 20414     | 4235            | 42            | 144                     | 927          | 695        | 232          |
| 1997 | 178073                | 133555        | 106958    | 21952     | 4644            | 46            | 158                     | 1009         | 756        | 253          |
| 1998 | 191127                | 143345        | 114663    | 23598     | 5084            | 50            | 173                     | 1097         | 822        | 275          |
| 1999 | 205232                | 153924        | 123007    | 25361     | 5556            | 55            | 189                     | 1193         | 894        | 299          |
| 2000 | 220470                | 165352        | 132040    | 27251     | 6061            | 60            | 206                     | 1296         | 972        | 324          |
| 2001 | 218567                | 163926        | 128321    | 29001     | 6603            | 65            | 224                     | 1402         | 1051       | 351          |
| 2002 | 216703                | 162527        | 124730    | 30620     | 7177            | 71            | 244                     | 1510         | 1132       | 378          |
| 2003 | 214876                | 161157        | 121263    | 32114     | 7779            | 76            | 264                     | 1623         | 1217       | 406          |
| 2004 | 213086                | 159814        | 117917    | 33491     | 8406            | 83            | 285                     | 1740         | 1305       | 435          |
| 2005 | 211333                | 158499        | 114687    | 34757     | 9055            | 89            | 306                     | 1863         | 1396       | 466          |
| 2006 | 209616                | 157212        | 111571    | 35918     | 9723            | 96            | 329                     | 1991         | 1493       | 498          |
| 2007 | 207944                | 155958        | 108571    | 36981     | 10405           | 102           | 351                     | 2125         | 1594       | 532          |

| Year | Total living with HCV | Total chronic | Total 0/1 | Total 2/3 | Total cirrhosis | HCC incidence | Liver failure incidence | Total deaths | HCV deaths | Other deaths |
|------|-----------------------|---------------|-----------|-----------|-----------------|---------------|-------------------------|--------------|------------|--------------|
| 2008 | 206308                | 154731        | 105680    | 37951     | 11100           | 109           | 374                     | 2268         | 1700       | 567          |
| 2009 | 204704                | 153528        | 102890    | 38833     | 11805           | 116           | 397                     | 2418         | 1813       | 605          |
| 2010 | 203147                | 152360        | 100211    | 39633     | 12517           | 123           | 421                     | 2577         | 1932       | 645          |
| 2011 | 201628                | 151221        | 97633     | 40356     | 13232           | 130           | 444                     | 2745         | 2058       | 687          |
| 2012 | 200141                | 150106        | 95151     | 41005     | 13950           | 137           | 468                     | 2924         | 2193       | 731          |
| 2013 | 198702                | 149026        | 92773     | 41586     | 14667           | 144           | 491                     | 3115         | 2335       | 779          |
| 2014 | 197301                | 147975        | 90490     | 42104     | 15381           | 151           | 515                     | 3317         | 2487       | 830          |
| 2015 | 195945                | 146958        | 88305     | 42563     | 16090           | 158           | 538                     | 3532         | 2649       | 883          |
| 2016 | 194640                | 145980        | 86220     | 42968     | 16793           | 165           | 561                     | 3761         | 2821       | 941          |
| 2017 | 193220                | 144915        | 84143     | 43292     | 17480           | 172           | 583                     | 4010         | 3007       | 1003         |
| 2018 | 191683                | 143762        | 82076     | 43538     | 18148           | 178           | 604                     | 4281         | 3210       | 1071         |
| 2019 | 190028                | 142521        | 80019     | 43708     | 18795           | 184           | 625                     | 4575         | 3431       | 1144         |
| 2020 | 188244                | 141183        | 77968     | 43799     | 19416           | 191           | 645                     | 4894         | 3670       | 1224         |
| 2021 | 186323                | 139742        | 75920     | 43813     | 20009           | 196           | 664                     | 5239         | 3929       | 1310         |
| 2022 | 184263                | 138197        | 73876     | 43751     | 20570           | 202           | 682                     | 5613         | 4210       | 1404         |
| 2023 | 182059                | 136544        | 71835     | 43613     | 21096           | 207           | 699                     | 6017         | 4513       | 1505         |
| 2024 | 179700                | 134775        | 69793     | 43399     | 21584           | 212           | 714                     | 6453         | 4839       | 1614         |
| 2025 | 177189                | 132892        | 67751     | 43110     | 22031           | 216           | 728                     | 6921         | 5175       | 1746         |
| 2026 | 174517                | 130888        | 65707     | 42746     | 22434           | 220           | 740                     | 7423         | 5516       | 1907         |
| 2027 | 171690                | 128768        | 63665     | 42312     | 22791           | 224           | 751                     | 7960         | 5864       | 2096         |
| 2028 | 168704                | 126528        | 61621     | 41807     | 23100           | 227           | 761                     | 8531         | 6215       | 2316         |
| 2029 | 165556                | 124167        | 59576     | 41231     | 23360           | 229           | 768                     | 9139         | 6571       | 2568         |
| 2030 | 162251                | 121688        | 57532     | 40589     | 23568           | 231           | 774                     | 9782         | 6930       | 2852         |
| 2031 | 158785                | 119089        | 55487     | 39879     | 23723           | 233           | 779                     | 10462        | 7291       | 3171         |

| Year | Total living with HCV | Total chronic | Total 0/1 | Total 2/3 | Total cirrhosis | HCC incidence | Liver failure incidence | Total deaths | HCV deaths | Other deaths |
|------|-----------------------|---------------|-----------|-----------|-----------------|---------------|-------------------------|--------------|------------|--------------|
| 2032 | 155164                | 116373        | 53443     | 39107     | 23824           | 234           | 781                     | 11178        | 7654       | 3524         |
| 2033 | 151387                | 113540        | 51399     | 38272     | 23869           | 234           | 782                     | 11930        | 8017       | 3913         |
| 2034 | 147456                | 110592        | 49358     | 37378     | 23856           | 234           | 780                     | 12719        | 8381       | 4338         |
| 2035 | 143378                | 107534        | 47320     | 36426     | 23787           | 233           | 777                     | 13544        | 8743       | 4801         |
| 2036 | 139153                | 104365        | 45288     | 35420     | 23656           | 232           | 772                     | 14407        | 9103       | 5304         |
| 2037 | 134792                | 101094        | 43264     | 34364     | 23466           | 230           | 765                     | 15306        | 9461       | 5846         |
| 2038 | 130298                | 97724         | 41249     | 33259     | 23216           | 228           | 755                     | 16241        | 9814       | 6427         |
| 2039 | 125681                | 94261         | 39245     | 32110     | 22905           | 224           | 744                     | 17211        | 10163      | 7048         |
| 2040 | 120947                | 90710         | 37255     | 30920     | 22534           | 221           | 731                     | 18215        | 10506      | 7709         |
| 2041 | 116099                | 87074         | 35280     | 29692     | 22102           | 217           | 716                     | 19254        | 10843      | 8411         |
| 2042 | 111147                | 83360         | 33321     | 28430     | 21609           | 212           | 699                     | 20327        | 11172      | 9155         |
| 2043 | 106103                | 79578         | 31383     | 27138     | 21057           | 206           | 680                     | 21431        | 11492      | 9938         |
| 2044 | 100991                | 75743         | 29472     | 25823     | 20448           | 200           | 659                     | 22564        | 11804      | 10760        |
| 2045 | 95802                 | 71851         | 27585     | 24486     | 19780           | 194           | 636                     | 23727        | 12105      | 11622        |
| 2046 | 90554                 | 67915         | 25728     | 23129     | 19058           | 187           | 612                     | 24916        | 12395      | 12521        |
| 2047 | 85269                 | 63952         | 23905     | 21761     | 18285           | 179           | 585                     | 26127        | 12674      | 13454        |
| 2048 | 79955                 | 59966         | 22119     | 20385     | 17463           | 171           | 558                     | 27359        | 12940      | 14420        |
| 2049 | 74640                 | 55980         | 20375     | 19008     | 16596           | 162           | 529                     | 28606        | 13192      | 15414        |
| 2050 | 69306                 | 51979         | 18671     | 17619     | 15689           | 154           | 498                     | 29866        | 13431      | 16434        |
| 2051 | 64041                 | 48031         | 17024     | 16258     | 14748           | 144           | 467                     | 31131        | 13656      | 17475        |
| 2052 | 58840                 | 44130         | 15435     | 14914     | 13780           | 135           | 435                     | 32396        | 13866      | 18530        |
| 2053 | 53720                 | 40290         | 13906     | 13593     | 12791           | 125           | 402                     | 33655        | 14061      | 19594        |
| 2054 | 48703                 | 36527         | 12441     | 12300     | 11786           | 115           | 369                     | 34903        | 14240      | 20663        |
| 2055 | 43820                 | 32865         | 11046     | 11044     | 10776           | 105           | 335                     | 36131        | 14404      | 21727        |

| Year | Total living with HCV | Total chronic | Total 0/1 | Total 2/3 | Total cirrhosis | HCC incidence | Liver failure incidence | Total deaths | HCV deaths | Other deaths |
|------|-----------------------|---------------|-----------|-----------|-----------------|---------------|-------------------------|--------------|------------|--------------|
| 2056 | 39106                 | 29329         | 9727      | 9834      | 9769            | 95            | 302                     | 37332        | 14553      | 22779        |
| 2057 | 34590                 | 25943         | 8490      | 8678      | 8775            | 86            | 270                     | 38495        | 14687      | 23809        |
| 2058 | 30298                 | 22724         | 7337      | 7582      | 7805            | 76            | 239                     | 39615        | 14805      | 24810        |
| 2059 | 26259                 | 19694         | 6275      | 6553      | 6866            | 67            | 208                     | 40681        | 14910      | 25771        |
| 2060 | 22505                 | 16879         | 5306      | 5600      | 5972            | 58            | 180                     | 41684        | 15001      | 26683        |
| 2061 | 19056                 | 14292         | 4433      | 4728      | 5131            | 50            | 153                     | 42617        | 15079      | 27538        |
| 2062 | 15922                 | 11942         | 3654      | 3938      | 4350            | 42            | 128                     | 43475        | 15145      | 28329        |
| 2063 | 13107                 | 9831          | 2968      | 3231      | 3632            | 35            | 106                     | 44255        | 15201      | 29055        |
| 2064 | 10628                 | 7971          | 2374      | 2611      | 2986            | 29            | 86                      | 44951        | 15246      | 29705        |
| 2065 | 8478                  | 6358          | 1868      | 2075      | 2415            | 24            | 68                      | 45563        | 15283      | 30280        |
| 2066 | 6647                  | 4986          | 1445      | 1621      | 1919            | 19            | 53                      | 46090        | 15312      | 30778        |
| 2067 | 5121                  | 3841          | 1099      | 1244      | 1497            | 15            | 41                      | 46535        | 15335      | 31200        |
| 2068 | 3864                  | 2898          | 818       | 935       | 1144            | 11            | 31                      | 46906        | 15352      | 31554        |
| 2069 | 2854                  | 2140          | 597       | 688       | 855             | 8             | 22                      | 47208        | 15365      | 31843        |
| 2070 | 2048                  | 1536          | 423       | 492       | 621             | 6             | 16                      | 47452        | 15375      | 32077        |
| 2071 | 1402                  | 1051          | 286       | 336       | 430             | 4             | 10                      | 47649        | 15381      | 32268        |
| 2072 | 903                   | 677           | 182       | 215       | 279             | 3             | 6                       | 47804        | 15386      | 32418        |
| 2073 | 519                   | 389           | 104       | 123       | 162             | 2             | 3                       | 47923        | 15388      | 32535        |
| 2074 | 228                   | 171           | 45        | 54        | 72              | 1             | 0                       | 48014        | 15389      | 32625        |
| 2075 | 0                     | 0             | 0         | 0         | 0               | 0             | 0                       | 48086        | 15389      | 32697        |

Note: Deaths are cumulative following cirrhosis

Table 3.5.3 Number of HCV infections and HCV-related deaths prevented through introduction of NSP

| Year | Living with HCV | Chronic | Stage 0/1 | Stage 2/3 | Cirrhosis | HCC incidence | Liver failure incidence | Total deaths | HCV deaths |
|------|-----------------|---------|-----------|-----------|-----------|---------------|-------------------------|--------------|------------|
| 1961 | 0               | 0       | 0         | 0         | 0         | 0             | 0                       | 0            | 0          |
| 1962 | 0               | 0       | 0         | 0         | 0         | 0             | 0                       | 0            | 0          |
| 1963 | 0               | 0       | 0         | 0         | 0         | 0             | 0                       | 0            | 0          |
| 1964 | 0               | 0       | 0         | 0         | 0         | 0             | 0                       | 0            | 0          |
| 1965 | 0               | 0       | 0         | 0         | 0         | 0             | 0                       | 0            | 0          |
| 1966 | 0               | 0       | 0         | 0         | 0         | 0             | 0                       | 0            | 0          |
| 1967 | 0               | 0       | 0         | 0         | 0         | 0             | 0                       | 0            | 0          |
| 1968 | 0               | 0       | 0         | 0         | 0         | 0             | 0                       | 0            | 0          |
| 1969 | 0               | 0       | 0         | 0         | 0         | 0             | 0                       | 0            | 0          |
| 1970 | 0               | 0       | 0         | 0         | 0         | 0             | 0                       | 0            | 0          |
| 1971 | 0               | 0       | 0         | 0         | 0         | 0             | 0                       | 0            | 0          |
| 1972 | 0               | 0       | 0         | 0         | 0         | 0             | 0                       | 0            | 0          |
| 1973 | 0               | 0       | 0         | 0         | 0         | 0             | 0                       | 0            | 0          |
| 1974 | 0               | 0       | 0         | 0         | 0         | 0             | 0                       | 0            | 0          |
| 1975 | 0               | 0       | 0         | 0         | 0         | 0             | 0                       | 0            | 0          |
| 1976 | 0               | 0       | 0         | 0         | 0         | 0             | 0                       | 0            | 0          |
| 1977 | 0               | 0       | 0         | 0         | 0         | 0             | 0                       | 0            | 0          |
| 1978 | 0               | 0       | 0         | 0         | 0         | 0             | 0                       | 0            | 0          |
| 1979 | 0               | 0       | 0         | 0         | 0         | 0             | 0                       | 0            | 0          |
| 1980 | 0               | 0       | 0         | 0         | 0         | 0             | 0                       | 0            | 0          |
| 1981 | 0               | 0       | 0         | 0         | 0         | 0             | 0                       | 0            | 0          |
| 1982 | 0               | 0       | 0         | 0         | 0         | 0             | 0                       | 0            | 0          |
| 1983 | 0               | 0       | 0         | 0         | 0         | 0             | 0                       | 0            | 0          |
| 1984 | 0               | 0       | 0         | 0         | 0         | 0             | 0                       | 0            | 0          |
| 1985 | 0               | 0       | 0         | 0         | 0         | 0             | 0                       | 0            | 0          |
| 1986 | 0               | 0       | 0         | 0         | 0         | 0             | 0                       | 0            | 0          |
| 1987 | 0               | 0       | 0         | 0         | 0         | 0             | 0                       | 0            | 0          |
| 1988 | 1009            | 757     | 742       | 15        | 0         | 0             | 0                       | 0            | 0          |
| 1989 | 2407            | 1805    | 1754      | 50        | 0         | 0             | 0                       | 1            | 1          |
| 1990 | 3798            | 2849    | 2743      | 105       | 1         | 0             | 0                       | 2            | 2          |
| 1991 | 5202            | 3902    | 3721      | 177       | 4         | 0             | 0                       | 4            | 3          |
| 1992 | 6635            | 4977    | 4703      | 266       | 8         | 0             | 0                       | 6            | 4          |
| 1993 | 8112            | 6084    | 5698      | 373       | 14        | 0             | 1                       | 9            | 6          |
| 1994 | 9647            | 7235    | 6718      | 496       | 22        | 0             | 1                       | 12           | 9          |
| 1995 | 11254           | 8440    | 7771      | 636       | 33        | 0             | 1                       | 16           | 12         |

| Year | Living with HCV | Chronic | Stage 0/1 | Stage 2/3 | Cirrhosis | HCC incidence | Liver failure incidence | Total deaths | HCV deaths |
|------|-----------------|---------|-----------|-----------|-----------|---------------|-------------------------|--------------|------------|
| 1996 | 12945           | 9709    | 8868      | 794       | 47        | 0             | 2                       | 20           | 15         |
| 1997 | 14734           | 11051   | 10018     | 969       | 64        | 1             | 2                       | 26           | 19         |
| 1998 | 16634           | 12476   | 11228     | 1162      | 85        | 1             | 3                       | 31           | 23         |
| 1999 | 18659           | 13994   | 12509     | 1375      | 110       | 1             | 4                       | 38           | 28         |
| 2000 | 20820           | 15615   | 13868     | 1607      | 140       | 1             | 5                       | 45           | 33         |
| 2001 | 20592           | 15444   | 13447     | 1823      | 174       | 2             | 6                       | 53           | 39         |
| 2002 | 20364           | 15273   | 13039     | 2022      | 213       | 2             | 8                       | 60           | 45         |
| 2003 | 20139           | 15104   | 12644     | 2205      | 255       | 3             | 9                       | 68           | 50         |
| 2004 | 19924           | 14943   | 12266     | 2376      | 301       | 3             | 11                      | 76           | 56         |
| 2005 | 19721           | 14791   | 11905     | 2535      | 351       | 3             | 12                      | 83           | 62         |
| 2006 | 19532           | 14649   | 11562     | 2683      | 405       | 4             | 14                      | 91           | 68         |
| 2007 | 19358           | 14518   | 11236     | 2822      | 461       | 5             | 16                      | 98           | 73         |
| 2008 | 19196           | 14397   | 10926     | 2951      | 520       | 5             | 18                      | 106          | 79         |
| 2009 | 19047           | 14285   | 10632     | 3072      | 582       | 6             | 20                      | 113          | 84         |
| 2010 | 18913           | 14185   | 10354     | 3185      | 646       | 6             | 22                      | 120          | 90         |
| 2011 | 18794           | 14095   | 10091     | 3292      | 713       | 7             | 24                      | 127          | 95         |
| 2012 | 18688           | 14016   | 9842      | 3392      | 781       | 8             | 27                      | 134          | 100        |
| 2013 | 18598           | 13948   | 9609      | 3487      | 852       | 8             | 29                      | 140          | 105        |
| 2014 | 18523           | 13892   | 9389      | 3578      | 925       | 9             | 31                      | 147          | 110        |
| 2015 | 18465           | 13848   | 9185      | 3664      | 1000      | 10            | 34                      | 153          | 114        |
| 2016 | 18424           | 13818   | 8994      | 3746      | 1077      | 11            | 36                      | 159          | 119        |
| 2017 | 18379           | 13784   | 8807      | 3822      | 1155      | 11            | 39                      | 165          | 123        |
| 2018 | 18329           | 13747   | 8622      | 3892      | 1234      | 12            | 42                      | 172          | 128        |
| 2019 | 18276           | 13707   | 8439      | 3955      | 1313      | 13            | 44                      | 179          | 134        |
| 2020 | 18217           | 13662   | 8258      | 4011      | 1393      | 14            | 47                      | 186          | 139        |
| 2021 | 18152           | 13614   | 8079      | 4061      | 1473      | 14            | 49                      | 195          | 146        |
| 2022 | 18080           | 13560   | 7902      | 4105      | 1553      | 15            | 52                      | 204          | 153        |
| 2023 | 18002           | 13501   | 7726      | 4143      | 1633      | 16            | 55                      | 214          | 160        |
| 2024 | 17915           | 13436   | 7550      | 4174      | 1712      | 17            | 57                      | 225          | 184        |
| 2025 | 17819           | 13364   | 7376      | 4199      | 1789      | 18            | 60                      | 238          | 212        |
| 2026 | 17712           | 13284   | 7201      | 4217      | 1866      | 18            | 62                      | 252          | 240        |
| 2027 | 17596           | 13197   | 7027      | 4229      | 1941      | 19            | 65                      | 268          | 270        |
| 2028 | 17468           | 13101   | 6853      | 4234      | 2013      | 20            | 67                      | 286          | 300        |
| 2029 | 17327           | 12995   | 6679      | 4233      | 2084      | 20            | 69                      | 305          | 332        |
| 2030 | 17172           | 12879   | 6504      | 4225      | 2151      | 21            | 71                      | 328          | 365        |
| 2031 | 17002           | 12751   | 6327      | 4209      | 2215      | 22            | 74                      | 353          | 398        |
| 2032 | 16815           | 12611   | 6150      | 4186      | 2275      | 22            | 75                      | 381          | 433        |



| Year | Living with HCV | Chronic | Stage 0/1 | Stage 2/3 | Cirrhosis | HCC incidence | Liver failure incidence | Total deaths | HCV deaths |
|------|-----------------|---------|-----------|-----------|-----------|---------------|-------------------------|--------------|------------|
| 2033 | 16611           | 12458   | 5970      | 4156      | 2331      | 23            | 77                      | 412          | 469        |
| 2034 | 16387           | 12291   | 5789      | 4119      | 2383      | 23            | 79                      | 447          | 505        |
| 2035 | 16144           | 12108   | 5606      | 4073      | 2428      | 24            | 80                      | 487          | 542        |
| 2036 | 15879           | 11909   | 5421      | 4020      | 2468      | 24            | 81                      | 531          | 579        |
| 2037 | 15592           | 11694   | 5233      | 3959      | 2502      | 25            | 82                      | 579          | 618        |
| 2038 | 15282           | 11461   | 5044      | 3889      | 2529      | 25            | 83                      | 634          | 656        |
| 2039 | 14946           | 11210   | 4851      | 3811      | 2548      | 25            | 84                      | 693          | 695        |
| 2040 | 14585           | 10939   | 4656      | 3725      | 2558      | 25            | 84                      | 759          | 734        |
| 2041 | 14197           | 10648   | 4457      | 3630      | 2560      | 25            | 84                      | 832          | 773        |
| 2042 | 13782           | 10336   | 4256      | 3527      | 2553      | 25            | 83                      | 912          | 812        |
| 2043 | 13338           | 10004   | 4053      | 3415      | 2536      | 25            | 83                      | 999          | 850        |
| 2044 | 12867           | 9651    | 3847      | 3295      | 2509      | 25            | 82                      | 1093         | 888        |
| 2045 | 12367           | 9275    | 3639      | 3166      | 2470      | 24            | 80                      | 1196         | 926        |
| 2046 | 11839           | 8880    | 3429      | 3030      | 2421      | 24            | 78                      | 1306         | 963        |
| 2047 | 11285           | 8464    | 3217      | 2886      | 2361      | 23            | 76                      | 1425         | 999        |
| 2048 | 10705           | 8028    | 3004      | 2735      | 2289      | 22            | 74                      | 1551         | 1034       |
| 2049 | 10102           | 7576    | 2792      | 2578      | 2207      | 22            | 71                      | 1685         | 1067       |
| 2050 | 9478            | 7109    | 2580      | 2415      | 2114      | 21            | 68                      | 1827         | 1100       |
| 2051 | 8838            | 6629    | 2369      | 2248      | 2011      | 20            | 64                      | 1975         | 1130       |
| 2052 | 8187            | 6140    | 2162      | 2079      | 1899      | 19            | 60                      | 2128         | 1159       |
| 2053 | 7529            | 5646    | 1959      | 1908      | 1779      | 17            | 56                      | 2286         | 1186       |
| 2054 | 6868            | 5151    | 1761      | 1736      | 1653      | 16            | 52                      | 2447         | 1211       |
| 2055 | 6211            | 4659    | 1570      | 1567      | 1521      | 15            | 48                      | 2609         | 1235       |
| 2056 | 5567            | 4175    | 1387      | 1401      | 1387      | 14            | 43                      | 2771         | 1256       |
| 2057 | 4941            | 3706    | 1214      | 1240      | 1252      | 12            | 39                      | 2931         | 1275       |
| 2058 | 4341            | 3256    | 1052      | 1087      | 1118      | 11            | 34                      | 3086         | 1292       |
| 2059 | 3772            | 2829    | 901       | 941       | 987       | 10            | 30                      | 3235         | 1307       |
| 2060 | 3240            | 2430    | 763       | 806       | 861       | 8             | 26                      | 3377         | 1320       |
| 2061 | 2749            | 2062    | 638       | 682       | 742       | 7             | 22                      | 3509         | 1331       |
| 2062 | 2302            | 1726    | 527       | 569       | 630       | 6             | 19                      | 3632         | 1341       |
| 2063 | 1891            | 1418    | 427       | 466       | 525       | 5             | 15                      | 3746         | 1349       |
| 2064 | 1528            | 1146    | 341       | 375       | 430       | 4             | 12                      | 3848         | 1355       |
| 2065 | 1214            | 910     | 267       | 297       | 346       | 3             | 10                      | 3938         | 1361       |
| 2066 | 948             | 711     | 206       | 231       | 274       | 3             | 8                       | 4014         | 1365       |
| 2067 | 728             | 546     | 156       | 177       | 213       | 2             | 6                       | 4079         | 1368       |
| 2068 | 548             | 411     | 116       | 133       | 162       | 2             | 4                       | 4132         | 1370       |
| 2069 | 403             | 302     | 84        | 97        | 121       | 1             | 3                       | 4175         | 1372       |

---

| Year | Living with HCV | Chronic | Stage 0/1 | Stage 2/3 | Cirrhosis | HCC incidence | Liver failure incidence | Total deaths | HCV deaths |
|------|-----------------|---------|-----------|-----------|-----------|---------------|-------------------------|--------------|------------|
| 2070 | 288             | 216     | 60        | 69        | 87        | 1             | 2                       | 4210         | 1374       |
| 2071 | 197             | 148     | 40        | 47        | 60        | 1             | 1                       | 4238         | 1375       |
| 2072 | 126             | 95      | 26        | 30        | 39        | 0             | 1                       | 4260         | 1375       |
| 2073 | 73              | 54      | 14        | 17        | 23        | 0             | 0                       | 4277         | 1376       |
| 2074 | 32              | 24      | 6         | 8         | 10        | 0             | 0                       | 4289         | 1376       |
| 2075 | 0               | 0       | 0         | 0         | 0         | 0             | 0                       | 4299         | 1376       |

Note: Deaths are cumulative following cirrhosis

**Table 3.5.5 Number of cases of chronic HCV by disease stage and diagnosis and HCV-deaths prevented by NSPs**

| Year | Chronic | Stage 0/1 diagnosed | Stage 0/1 undiagnosed | Stage 2/3 diagnosed | Stage 2/3 undiagnosed | Cirrhosis diagnosed | Cirrhosis undiagnosed | HCC | Liver failure | HCV deaths |
|------|---------|---------------------|-----------------------|---------------------|-----------------------|---------------------|-----------------------|-----|---------------|------------|
| 1988 | 757     | 445                 | 297                   | 11                  | 4                     | 0                   | 0                     | 0   | 0             | 0          |
| 1989 | 1805    | 1053                | 702                   | 38                  | 13                    | 0                   | 0                     | 0   | 0             | 1          |
| 1990 | 2849    | 1646                | 1097                  | 78                  | 26                    | 1                   | 0                     | 0   | 0             | 2          |
| 1991 | 3902    | 2233                | 1489                  | 132                 | 44                    | 3                   | 1                     | 0   | 0             | 3          |
| 1992 | 4977    | 2822                | 1881                  | 200                 | 67                    | 6                   | 2                     | 0   | 0             | 4          |
| 1993 | 6084    | 3419                | 2279                  | 279                 | 93                    | 11                  | 3                     | 0   | 1             | 6          |
| 1994 | 7235    | 4031                | 2687                  | 372                 | 124                   | 18                  | 4                     | 0   | 1             | 9          |
| 1995 | 8440    | 4663                | 3108                  | 477                 | 159                   | 26                  | 7                     | 0   | 1             | 12         |
| 1996 | 9709    | 5321                | 3547                  | 595                 | 198                   | 37                  | 9                     | 0   | 2             | 15         |
| 1997 | 11051   | 6011                | 4007                  | 727                 | 242                   | 51                  | 13                    | 1   | 2             | 19         |
| 1998 | 12476   | 6737                | 4491                  | 872                 | 291                   | 68                  | 17                    | 1   | 3             | 23         |
| 1999 | 13994   | 7505                | 5004                  | 1031                | 344                   | 88                  | 22                    | 1   | 4             | 28         |
| 2000 | 15615   | 8321                | 5547                  | 1205                | 402                   | 112                 | 28                    | 1   | 5             | 33         |
| 2001 | 15444   | 8068                | 5379                  | 1367                | 456                   | 139                 | 35                    | 2   | 6             | 39         |
| 2002 | 15273   | 7823                | 5216                  | 1516                | 505                   | 170                 | 43                    | 2   | 8             | 45         |
| 2003 | 15104   | 7586                | 5058                  | 1654                | 551                   | 204                 | 51                    | 3   | 9             | 50         |
| 2004 | 14943   | 7359                | 4906                  | 1782                | 594                   | 241                 | 60                    | 3   | 11            | 56         |
| 2005 | 14791   | 7143                | 4762                  | 1901                | 634                   | 281                 | 70                    | 3   | 12            | 62         |
| 2006 | 14649   | 6937                | 4625                  | 2012                | 671                   | 324                 | 81                    | 4   | 14            | 68         |
| 2007 | 14518   | 6741                | 4494                  | 2116                | 705                   | 369                 | 92                    | 5   | 16            | 73         |
| 2008 | 14397   | 6556                | 4370                  | 2213                | 738                   | 416                 | 104                   | 5   | 18            | 79         |
| 2009 | 14285   | 6379                | 4253                  | 2304                | 768                   | 465                 | 116                   | 6   | 20            | 84         |
| 2010 | 14185   | 6212                | 4142                  | 2389                | 796                   | 517                 | 129                   | 6   | 22            | 90         |
| 2011 | 14095   | 6054                | 4036                  | 2469                | 823                   | 570                 | 143                   | 7   | 24            | 95         |
| 2012 | 14016   | 5905                | 3937                  | 2544                | 848                   | 625                 | 156                   | 8   | 27            | 100        |
| 2013 | 13948   | 5765                | 3843                  | 2616                | 872                   | 682                 | 170                   | 8   | 29            | 105        |
| 2014 | 13892   | 5634                | 3756                  | 2683                | 894                   | 740                 | 185                   | 9   | 31            | 110        |
| 2015 | 13848   | 5511                | 3674                  | 2748                | 916                   | 800                 | 200                   | 10  | 34            | 114        |
| 2016 | 13818   | 5397                | 3598                  | 2810                | 937                   | 862                 | 215                   | 11  | 36            | 119        |
| 2017 | 13784   | 5284                | 3523                  | 2867                | 956                   | 924                 | 231                   | 11  | 39            | 123        |
| 2018 | 13747   | 5173                | 3449                  | 2919                | 973                   | 987                 | 247                   | 12  | 42            | 128        |
| 2019 | 13707   | 5063                | 3375                  | 2966                | 989                   | 1051                | 263                   | 13  | 44            | 134        |
| 2020 | 13662   | 4955                | 3303                  | 3008                | 1003                  | 1115                | 279                   | 14  | 47            | 139        |
| 2021 | 13614   | 4847                | 3232                  | 3046                | 1015                  | 1179                | 295                   | 14  | 49            | 146        |
| 2022 | 13560   | 4741                | 3161                  | 3079                | 1026                  | 1243                | 311                   | 15  | 52            | 153        |
| 2023 | 13501   | 4635                | 3090                  | 3107                | 1036                  | 1306                | 327                   | 16  | 55            | 160        |

| Year | Chronic | Stage 0/1 diagnosed | Stage 0/1 undiagnosed | Stage 2/3 diagnosed | Stage 2/3 undiagnosed | Cirrhosis diagnosed | Cirrhosis undiagnosed | HCC | Liver failure | HCV deaths |
|------|---------|---------------------|-----------------------|---------------------|-----------------------|---------------------|-----------------------|-----|---------------|------------|
| 2024 | 13436   | 4530                | 3020                  | 3131                | 1044                  | 1369                | 342                   | 17  | 57            | 184        |
| 2025 | 13364   | 4425                | 2950                  | 3149                | 1050                  | 1432                | 358                   | 18  | 60            | 212        |
| 2026 | 13284   | 4321                | 2881                  | 3163                | 1054                  | 1493                | 373                   | 18  | 62            | 240        |
| 2027 | 13197   | 4216                | 2811                  | 3172                | 1057                  | 1552                | 388                   | 19  | 65            | 270        |
| 2028 | 13101   | 4112                | 2741                  | 3176                | 1059                  | 1611                | 403                   | 20  | 67            | 300        |
| 2029 | 12995   | 4007                | 2671                  | 3175                | 1058                  | 1667                | 417                   | 20  | 69            | 332        |
| 2030 | 12879   | 3902                | 2601                  | 3168                | 1056                  | 1721                | 430                   | 21  | 71            | 365        |
| 2031 | 12751   | 3796                | 2531                  | 3157                | 1052                  | 1772                | 443                   | 22  | 74            | 398        |
| 2032 | 12611   | 3690                | 2460                  | 3140                | 1047                  | 1820                | 455                   | 22  | 75            | 433        |
| 2033 | 12458   | 3582                | 2388                  | 3117                | 1039                  | 1865                | 466                   | 23  | 77            | 469        |
| 2034 | 12291   | 3474                | 2316                  | 3089                | 1030                  | 1906                | 477                   | 23  | 79            | 505        |
| 2035 | 12108   | 3364                | 2242                  | 3055                | 1018                  | 1943                | 486                   | 24  | 80            | 542        |
| 2036 | 11909   | 3253                | 2168                  | 3015                | 1005                  | 1975                | 494                   | 24  | 81            | 579        |
| 2037 | 11694   | 3140                | 2093                  | 2969                | 990                   | 2002                | 500                   | 25  | 82            | 618        |
| 2038 | 11461   | 3026                | 2017                  | 2917                | 972                   | 2023                | 506                   | 25  | 83            | 656        |
| 2039 | 11210   | 2911                | 1940                  | 2859                | 953                   | 2038                | 510                   | 25  | 84            | 695        |
| 2040 | 10939   | 2793                | 1862                  | 2794                | 931                   | 2047                | 512                   | 25  | 84            | 734        |
| 2041 | 10648   | 2674                | 1783                  | 2723                | 908                   | 2048                | 512                   | 25  | 84            | 773        |
| 2042 | 10336   | 2554                | 1703                  | 2645                | 882                   | 2042                | 511                   | 25  | 83            | 812        |
| 2043 | 10004   | 2432                | 1621                  | 2561                | 854                   | 2029                | 507                   | 25  | 83            | 850        |
| 2044 | 9651    | 2308                | 1539                  | 2471                | 824                   | 2007                | 502                   | 25  | 82            | 888        |
| 2045 | 9275    | 2183                | 1456                  | 2375                | 792                   | 1976                | 494                   | 24  | 80            | 926        |
| 2046 | 8880    | 2057                | 1371                  | 2272                | 757                   | 1937                | 484                   | 24  | 78            | 963        |
| 2047 | 8464    | 1930                | 1287                  | 2164                | 721                   | 1889                | 472                   | 23  | 76            | 999        |
| 2048 | 8028    | 1803                | 1202                  | 2051                | 684                   | 1832                | 458                   | 22  | 74            | 1034       |
| 2049 | 7576    | 1675                | 1117                  | 1933                | 644                   | 1766                | 441                   | 22  | 71            | 1067       |
| 2050 | 7109    | 1548                | 1032                  | 1811                | 604                   | 1691                | 423                   | 21  | 68            | 1100       |
| 2051 | 6629    | 1422                | 948                   | 1686                | 562                   | 1609                | 402                   | 20  | 64            | 1130       |
| 2052 | 6140    | 1297                | 865                   | 1559                | 520                   | 1519                | 380                   | 19  | 60            | 1159       |
| 2053 | 5646    | 1176                | 784                   | 1431                | 477                   | 1423                | 356                   | 17  | 56            | 1186       |
| 2054 | 5151    | 1057                | 705                   | 1302                | 434                   | 1322                | 331                   | 16  | 52            | 1211       |
| 2055 | 4659    | 942                 | 628                   | 1175                | 392                   | 1217                | 304                   | 15  | 48            | 1235       |
| 2056 | 4175    | 832                 | 555                   | 1051                | 350                   | 1110                | 277                   | 14  | 43            | 1256       |
| 2057 | 3706    | 728                 | 486                   | 930                 | 310                   | 1001                | 250                   | 12  | 39            | 1275       |
| 2058 | 3256    | 631                 | 421                   | 815                 | 272                   | 894                 | 224                   | 11  | 34            | 1292       |
| 2059 | 2829    | 541                 | 360                   | 706                 | 235                   | 789                 | 197                   | 10  | 30            | 1307       |
| 2060 | 2430    | 458                 | 305                   | 605                 | 202                   | 689                 | 172                   | 8   | 26            | 1320       |

| Year | Chronic | Stage 0/1 diagnosed | Stage 0/1 undiagnosed | Stage2/3 diagnosed | Stage 2/3 undiagnosed | Cirrhosis diagnosed | Cirrhosis undiagnosed | HCC | Liver failure | HCV deaths |
|------|---------|---------------------|-----------------------|--------------------|-----------------------|---------------------|-----------------------|-----|---------------|------------|
| 2061 | 2062    | 383                 | 255                   | 511                | 170                   | 593                 | 148                   | 7   | 22            | 1331       |
| 2062 | 1726    | 316                 | 211                   | 427                | 142                   | 504                 | 126                   | 6   | 19            | 1341       |
| 2063 | 1418    | 256                 | 171                   | 349                | 116                   | 420                 | 105                   | 5   | 15            | 1349       |
| 2064 | 1146    | 204                 | 136                   | 281                | 94                    | 344                 | 86                    | 4   | 12            | 1355       |
| 2065 | 910     | 160                 | 107                   | 223                | 74                    | 277                 | 69                    | 3   | 10            | 1361       |
| 2066 | 711     | 124                 | 82                    | 173                | 58                    | 219                 | 55                    | 3   | 8             | 1365       |
| 2067 | 546     | 94                  | 62                    | 133                | 44                    | 170                 | 43                    | 2   | 6             | 1368       |
| 2068 | 411     | 70                  | 46                    | 99                 | 33                    | 130                 | 32                    | 2   | 4             | 1370       |
| 2069 | 302     | 51                  | 34                    | 73                 | 24                    | 97                  | 24                    | 1   | 3             | 1372       |
| 2070 | 216     | 36                  | 24                    | 52                 | 17                    | 70                  | 17                    | 1   | 2             | 1374       |
| 2071 | 148     | 24                  | 16                    | 35                 | 12                    | 48                  | 12                    | 1   | 1             | 1375       |
| 2072 | 95      | 15                  | 10                    | 23                 | 8                     | 31                  | 8                     | 0   | 1             | 1375       |
| 2073 | 54      | 9                   | 6                     | 13                 | 4                     | 18                  | 5                     | 0   | 0             | 1376       |
| 2074 | 24      | 4                   | 3                     | 6                  | 2                     | 8                   | 2                     | 0   | 0             | 1376       |
| 2075 | 0       | 0                   | 0                     | 0                  | 0                     | 0                   | 0                     | 0   | 0             | 1376       |

Note: Deaths are cumulative following cirrhosis

---

## **APPENDIX D**

### **DETAILED TABLES ON FINANCIAL EFFECTS AND NPV OF NSPs**

|                                      |                             | 1991         | 1992             | 1993                   | 1994          | 1995                       | 1996          | 1997             | 1998                   | 1999          | 2000          |
|--------------------------------------|-----------------------------|--------------|------------------|------------------------|---------------|----------------------------|---------------|------------------|------------------------|---------------|---------------|
| <b>NSP Expenditure</b>               |                             |              |                  |                        |               |                            |               |                  |                        |               |               |
| Total Govt NSP Expend                |                             | -\$8,482,805 | -\$9,229,559     | -\$9,830,915           | -\$10,588,542 | -\$11,127,279              | -\$12,341,186 | -\$15,005,665    | -\$16,353,751          | -\$17,505,049 | -\$19,673,115 |
| All NSP Expend                       |                             | -\$9,573,954 | -\$10,412,793    | -\$11,438,420          | -\$12,493,700 | -\$12,992,474              | -\$13,896,572 | -\$17,048,446    | -\$18,979,078          | -\$20,434,694 | -\$22,674,291 |
| <b>HIV Effects - Cases Avoided</b>   |                             |              |                  |                        |               |                            |               |                  |                        |               |               |
| CD4 >500                             | Diagnosed                   | 544          | 887              | 1,369                  | 2,033         | 2,950                      | 4,213         | 5,935            | 8,255                  | 11,320        | 15,277        |
| CD4 <500                             | Diagnosed                   | 47           | 107              | 210                    | 373           | 616                        | 1,004         | 1,573            | 2,399                  | 3,585         | 5,266         |
| AIDS                                 | Diagnosed                   | 10           | 23               | 44                     | 78            | 131                        | 192           | 278              | 393                    | 540           | 725           |
| <b>Total Diag. HIV Cases Avoided</b> |                             | 601          | 1,017            | 1,623                  | 2,484         | 3,697                      | 5,409         | 7,786            | 11,047                 | 15,445        | 21,268        |
| <b>Annual Treatment Costs-HIV</b>    |                             |              |                  |                        |               |                            |               |                  |                        |               |               |
| CD4>500                              |                             | \$1,520,716  | \$2,479,550      | \$3,826,950            | \$5,683,119   | \$8,246,532                | \$11,777,166  | \$30,683,950     | \$42,678,350           | \$58,524,400  | \$78,982,090  |
| CD4<500                              |                             | \$211,430    | \$481,341        | \$944,687              | \$1,677,944   | \$2,771,082                | \$4,516,505   | \$13,612,742     | \$20,760,946           | \$31,024,590  | \$45,571,964  |
| AIDS                                 |                             | \$837,771    | \$1,926,874      | \$3,686,194            | \$6,534,616   | \$10,974,805               | \$16,085,210  | \$13,882,473     | \$19,625,223           | \$26,965,955  | \$36,204,291  |
| <b>Total HIV Costs Avoided</b>       |                             | \$2,569,918  | \$4,887,765      | \$8,457,831            | \$13,895,679  | \$21,992,419               | \$32,378,880  | \$58,179,165     | \$83,064,519           | \$116,514,945 | \$160,758,345 |
| <b>Net Govt Expenditure/Savings</b>  |                             | -\$5,912,888 | -\$4,341,794     | -\$1,373,084           | \$3,307,137   | \$10,865,140               | \$20,037,694  | \$43,173,500     | \$66,710,768           | \$99,009,896  | \$141,085,230 |
| <b>Net All Expend/Savings</b>        |                             | -\$7,004,036 | -\$5,525,028     | -\$2,980,589           | \$1,401,979   | \$8,999,946                | \$18,482,308  | \$41,130,719     | \$64,085,440           | \$96,080,251  | \$138,084,054 |
| <b>HIV</b>                           | <b>NPV Govt Expend @ 5%</b> |              | <b>All Years</b> | <b>\$2,276,548,829</b> |               | <b>NPV All Expend @ 5%</b> |               | <b>All Years</b> | <b>\$2,261,898,701</b> |               |               |
|                                      |                             |              | <b>To 2000</b>   | <b>\$241,702,597</b>   |               |                            |               | <b>To 2000</b>   | <b>\$227,052,469</b>   |               |               |
|                                      | <b>NPV Govt Expend @ 3%</b> |              | <b>All Years</b> | <b>\$3,414,541,497</b> |               | <b>NPV All Expend @ 3%</b> |               | <b>All Years</b> | <b>\$3,398,079,560</b> |               |               |
|                                      |                             |              | <b>To 2000</b>   | <b>\$286,631,780</b>   |               |                            |               | <b>To 2000</b>   | <b>\$270,169,843</b>   |               |               |
|                                      | <b>NPV Govt Expend @ 0%</b> |              | <b>All Years</b> | <b>\$6,895,585,578</b> |               | <b>NPV All Expend @ 0%</b> |               | <b>All Years</b> | <b>\$6,875,779,022</b> |               |               |
|                                      |                             |              | <b>To 2000</b>   | <b>\$372,561,599</b>   |               |                            |               | <b>To 2000</b>   | <b>\$352,755,044</b>   |               |               |

|                                      | 1991                        | 1992               | 1993                   | 1994                       | 1995                | 1996                   | 1997                | 1998                | 1999                 | 2000                 |
|--------------------------------------|-----------------------------|--------------------|------------------------|----------------------------|---------------------|------------------------|---------------------|---------------------|----------------------|----------------------|
| <b>HCV Effects - Cases Avoided</b>   |                             |                    |                        |                            |                     |                        |                     |                     |                      |                      |
| Stage 0/1 Diagnosed                  | 2,233                       | 2,822              | 3,419                  | 4,031                      | 4,663               | 5,321                  | 6,011               | 6,737               | 7,505                | 8,321                |
| Stage 2/3 Diagnosed                  | 132                         | 200                | 279                    | 372                        | 477                 | 595                    | 727                 | 872                 | 1,031                | 1,205                |
| Cirrhosis Diagnosed                  | 3                           | 6                  | 11                     | 18                         | 26                  | 37                     | 51                  | 68                  | 88                   | 112                  |
| HCC Diagnosed                        | 0                           | 0                  | 0                      | 0                          | 0                   | 0                      | 1                   | 1                   | 1                    | 1                    |
| Liver Failure Diagnosed              | 0                           | 0                  | 1                      | 1                          | 1                   | 2                      | 2                   | 3                   | 4                    | 5                    |
| <b>Total Diag. HCV Cases Avoided</b> | <b>2,368</b>                | <b>3,028</b>       | <b>3,710</b>           | <b>4,422</b>               | <b>5,167</b>        | <b>5,955</b>           | <b>6,792</b>        | <b>7,681</b>        | <b>8,629</b>         | <b>9,644</b>         |
| <b>Whole of HCV Episode Costs</b>    | <b>\$123,272</b>            | <b>\$157,517</b>   | <b>\$192,752</b>       | <b>\$229,499</b>           | <b>\$267,914</b>    | <b>\$308,362</b>       | <b>\$351,207</b>    | <b>\$396,607</b>    | <b>\$444,925</b>     | <b>\$496,527</b>     |
| <b>Annual Treatment Costs-HCV</b>    |                             |                    |                        |                            |                     |                        |                     |                     |                      |                      |
| Stage 0/1                            | \$453,299                   | \$572,866          | \$694,057              | \$818,293                  | \$946,589           | \$1,080,163            | \$1,220,233         | \$1,367,611         | \$1,523,515          | \$1,689,163          |
| Stage 2/3                            | \$26,796                    | \$40,600           | \$56,637               | \$75,516                   | \$96,831            | \$120,785              | \$147,581           | \$177,016           | \$209,293            | \$244,615            |
| Cirrhosis                            | \$1,140                     | \$2,280            | \$4,180                | \$6,840                    | \$9,880             | \$14,060               | \$19,380            | \$25,840            | \$33,440             | \$42,560             |
| HCC                                  | \$0                         | \$0                | \$0                    | \$0                        | \$0                 | \$0                    | \$100,770           | \$100,770           | \$100,770            | \$100,770            |
| Liver Failure                        | \$0                         | \$0                | \$167,109              | \$167,109                  | \$167,109           | \$334,219              | \$334,219           | \$501,328           | \$668,438            | \$835,547            |
| <b>Total HCV Costs Avoided</b>       | <b>\$604,507</b>            | <b>\$773,263</b>   | <b>\$1,114,736</b>     | <b>\$1,297,258</b>         | <b>\$1,488,324</b>  | <b>\$1,857,589</b>     | <b>\$2,173,390</b>  | <b>\$2,569,172</b>  | <b>\$2,980,381</b>   | <b>\$3,409,182</b>   |
| <b>Total Costs Avoided HIV + HCV</b> | <b>\$3,174,425</b>          | <b>\$5,661,028</b> | <b>\$9,572,567</b>     | <b>\$15,192,937</b>        | <b>\$23,480,743</b> | <b>\$34,236,469</b>    | <b>\$60,352,555</b> | <b>\$85,633,691</b> | <b>\$119,495,325</b> | <b>\$164,167,527</b> |
| <b>Net Govt Expenditure/Savings</b>  | <b>-\$5,308,381</b>         | <b>\$3,568,531</b> | <b>-\$258,349</b>      | <b>\$4,604,395</b>         | <b>\$12,353,463</b> | <b>\$21,895,283</b>    | <b>\$45,346,890</b> | <b>\$69,279,940</b> | <b>\$101,990,277</b> | <b>\$144,494,413</b> |
| <b>Net All Expend/Savings</b>        | <b>-\$6,399,529</b>         | <b>\$4,751,765</b> | <b>-\$1,865,853</b>    | <b>\$2,699,237</b>         | <b>\$10,488,269</b> | <b>\$20,339,897</b>    | <b>\$43,304,109</b> | <b>\$66,654,612</b> | <b>\$99,060,631</b>  | <b>\$141,493,236</b> |
| <b>HIV+HCV</b>                       | <b>NPV Govt Expend @ 5%</b> | <b>All Years</b>   | <b>\$2,401,575,004</b> | <b>NPV All Expend @ 5%</b> | <b>All Years</b>    | <b>\$2,386,924,875</b> |                     |                     |                      |                      |
|                                      |                             | <b>To 2000</b>     | <b>\$254,859,826</b>   |                            | <b>To 2000</b>      | <b>\$240,209,698</b>   |                     |                     |                      |                      |
|                                      | <b>NPV Govt Expend @ 3%</b> | <b>All Years</b>   | <b>\$3,653,324,247</b> | <b>NPV All Expend @ 3%</b> | <b>All Years</b>    | <b>\$3,636,862,310</b> |                     |                     |                      |                      |
|                                      |                             | <b>To 2000</b>     | <b>\$301,576,093</b>   |                            | <b>To 2000</b>      | <b>\$285,114,155</b>   |                     |                     |                      |                      |
|                                      | <b>NPV Govt Expend @ 0%</b> | <b>All Years</b>   | <b>\$7,678,155,690</b> | <b>NPV All Expend @ 0%</b> | <b>All Years</b>    | <b>\$7,658,349,135</b> |                     |                     |                      |                      |
|                                      |                             | <b>To 2000</b>     | <b>\$390,829,399</b>   |                            | <b>To 2000</b>      | <b>\$371,022,844</b>   |                     |                     |                      |                      |



|                                      |           | 2001          | 2002          | 2003          | 2004          | 2005          | 2006          | 2007          | 2008          | 2009          | 2010          |
|--------------------------------------|-----------|---------------|---------------|---------------|---------------|---------------|---------------|---------------|---------------|---------------|---------------|
| <b>NSP Expenditure</b>               |           |               |               |               |               |               |               |               |               |               |               |
| Total Govt NSP Expend                |           |               |               |               |               |               |               |               |               |               |               |
| All NSP Expend                       |           |               |               |               |               |               |               |               |               |               |               |
| <b>HIV Effects - Cases Avoided</b>   |           |               |               |               |               |               |               |               |               |               |               |
| CD4 >500                             | Diagnosed | 12,681        | 9,833         | 7,142         | 4,896         | 3,230         | 2,105         | 1,363         | 876           | 560           | 356           |
| CD4 <500                             | Diagnosed | 7,551         | 10,027        | 12,247        | 13,901        | 14,865        | 15,196        | 15,094        | 14,733        | 14,210        | 13,603        |
| AIDS                                 | Diagnosed | 946           | 1,219         | 1,521         | 1,834         | 2,130         | 2,392         | 2,602         | 2,746         | 2,828         | 2,849         |
| <b>Total Diag. HIV Cases Avoided</b> |           | 21,178        | 21,079        | 20,910        | 20,631        | 20,225        | 19,693        | 19,059        | 18,355        | 17,598        | 16,808        |
| <b>Annual Treatment Costs-HIV</b>    |           |               |               |               |               |               |               |               |               |               |               |
| CD4>500                              |           | \$65,560,770  | \$50,836,610  | \$36,924,140  | \$25,312,320  | \$16,699,100  | \$10,882,850  | \$7,046,710   | \$4,528,920   | \$2,895,200   | \$1,840,520   |
| CD4<500                              |           | \$65,346,354  | \$86,773,658  | \$105,985,538 | \$120,299,254 | \$128,641,710 | \$131,506,184 | \$130,623,476 | \$127,499,382 | \$122,973,340 | \$117,720,362 |
| AIDS                                 |           | \$47,240,358  | \$60,873,146  | \$75,954,106  | \$91,584,372  | \$106,365,711 | \$119,449,192 | \$129,935,953 | \$137,126,874 | \$141,221,704 | \$142,270,380 |
| <b>Total HIV Costs Avoided</b>       |           | \$178,147,482 | \$198,483,414 | \$218,863,784 | \$237,195,946 | \$251,706,521 | \$261,838,226 | \$267,606,139 | \$269,155,176 | \$267,090,244 | \$261,831,262 |

|                                      |           | 2001          | 2002          | 2003          | 2004          | 2005          | 2006          | 2007          | 2008          | 2009          | 2010          |
|--------------------------------------|-----------|---------------|---------------|---------------|---------------|---------------|---------------|---------------|---------------|---------------|---------------|
| <b>HCV Effects - Cases Avoided</b>   |           |               |               |               |               |               |               |               |               |               |               |
| Stage 0/1                            | Diagnosed | 8,068         | 7,823         | 7,586         | 7,359         | 7,143         | 6,937         | 6,741         | 6,556         | 6,379         | 6,212         |
| Stage 2/3                            | Diagnosed | 1,367         | 1,516         | 1,654         | 1,782         | 1,901         | 2,012         | 2,116         | 2,213         | 2,304         | 2,389         |
| Cirrhosis                            | Diagnosed | 139           | 170           | 204           | 241           | 281           | 324           | 369           | 416           | 465           | 517           |
| HCC                                  | Diagnosed | 2             | 2             | 3             | 3             | 3             | 4             | 5             | 5             | 6             | 6             |
| Liver Failure                        | Diagnosed | 6             | 8             | 9             | 11            | 12            | 14            | 16            | 18            | 20            | 22            |
| <b>Total Diag. HCV Cases Avoided</b> |           | 9,582         | 9,519         | 9,456         | 9,396         | 9,340         | 9,291         | 9,247         | 9,208         | 9,174         | 9,146         |
| <b>Whole of HCV Episode Costs</b>    |           | \$491,784     | \$486,780     | \$481,620     | \$476,460     | \$471,404     | \$466,452     | \$461,657     | \$457,070     | \$452,587     | \$448,313     |
| <b>Annual Treatment Costs-HCV</b>    |           |               |               |               |               |               |               |               |               |               |               |
| Stage 0/1                            |           | \$1,637,804   | \$1,588,069   | \$1,539,958   | \$1,493,877   | \$1,450,029   | \$1,408,211   | \$1,368,423   | \$1,330,868   | \$1,294,937   | \$1,261,036   |
| Stage 2/3                            |           | \$277,501     | \$307,748     | \$335,762     | \$361,746     | \$385,903     | \$408,436     | \$429,548     | \$449,239     | \$467,712     | \$484,967     |
| Cirrhosis                            |           | \$52,820      | \$64,600      | \$77,520      | \$91,580      | \$106,780     | \$123,120     | \$140,220     | \$158,080     | \$176,700     | \$196,460     |
| HCC                                  |           | \$201,539     | \$201,539     | \$302,309     | \$302,309     | \$302,309     | \$403,079     | \$503,848     | \$503,848     | \$604,618     | \$604,618     |
| Liver Failure                        |           | \$1,002,656   | \$1,336,875   | \$1,503,985   | \$1,838,203   | \$2,005,313   | \$2,339,532   | \$2,673,751   | \$3,007,969   | \$3,342,188   | \$3,676,407   |
| <b>Total HCV Costs Avoided</b>       |           | \$3,664,105   | \$3,985,612   | \$4,241,154   | \$4,564,176   | \$4,721,738   | \$5,148,830   | \$5,577,447   | \$5,907,075   | \$6,338,743   | \$6,671,801   |
| <b>Total Costs Avoided HIV + HCV</b> |           | \$181,811,587 | \$202,469,026 | \$223,104,938 | \$241,760,122 | \$256,428,259 | \$266,987,056 | \$273,183,586 | \$275,062,251 | \$273,428,987 | \$268,503,064 |

|                                      |           | 2011          | 2012          | 2013          | 2014          | 2015          | 2016          | 2017          | 2018          | 2019          | 2020          |
|--------------------------------------|-----------|---------------|---------------|---------------|---------------|---------------|---------------|---------------|---------------|---------------|---------------|
| <b>NSP Expenditure</b>               |           |               |               |               |               |               |               |               |               |               |               |
| Total Govt NSP Expend                |           |               |               |               |               |               |               |               |               |               |               |
| All NSP Expend                       |           |               |               |               |               |               |               |               |               |               |               |
| <b>HIV Effects - Cases Avoided</b>   |           |               |               |               |               |               |               |               |               |               |               |
| CD4 >500                             | Diagnosed | 225           | 141           | 88            | 55            | 34            | 21            | 13            | 8             | 5             | 3             |
| CD4 <500                             | Diagnosed | 12,958        | 12,296        | 11,638        | 10,996        | 10,375        | 9,781         | 9,214         | 8,677         | 8,165         | 7,679         |
| AIDS                                 | Diagnosed | 2,824         | 2,762         | 2,674         | 2,569         | 2,453         | 2,331         | 2,208         | 2,086         | 1,968         | 1,855         |
| <b>Total Diag. HIV Cases Avoided</b> |           | 16,007        | 15,199        | 14,400        | 13,620        | 12,862        | 12,133        | 11,435        | 10,771        | 10,138        | 9,537         |
| <b>Annual Treatment Costs-HIV</b>    |           |               |               |               |               |               |               |               |               |               |               |
| CD4>500                              |           | \$1,163,250   | \$728,970     | \$454,960     | \$284,350     | \$175,780     | \$108,570     | \$67,210      | \$41,360      | \$25,850      | \$15,510      |
| CD4<500                              |           | \$112,138,532 | \$106,409,584 | \$100,715,252 | \$95,159,384  | \$89,785,250  | \$84,644,774  | \$79,737,956  | \$75,090,758  | \$70,659,910  | \$66,454,066  |
| AIDS                                 |           | \$141,021,956 | \$137,925,865 | \$133,531,413 | \$128,288,033 | \$122,495,347 | \$116,403,038 | \$110,260,793 | \$104,168,485 | \$98,275,924  | \$92,633,048  |
| <b>Total HIV Costs Avoided</b>       |           | \$254,323,738 | \$245,064,419 | \$234,701,625 | \$223,731,767 | \$212,456,377 | \$201,156,382 | \$190,065,959 | \$179,300,603 | \$168,961,684 | \$159,102,624 |

|                                      |           | 2011          | 2012          | 2013          | 2014          | 2015          | 2016          | 2017          | 2018          | 2019          | 2020          |
|--------------------------------------|-----------|---------------|---------------|---------------|---------------|---------------|---------------|---------------|---------------|---------------|---------------|
| <b>HCV Effects - Cases Avoided</b>   |           |               |               |               |               |               |               |               |               |               |               |
| Stage 0/1                            | Diagnosed | 6,054         | 5,905         | 5,765         | 5,634         | 5,511         | 5,397         | 5,284         | 5,173         | 5,063         | 4,955         |
| Stage 2/3                            | Diagnosed | 2,469         | 2,544         | 2,616         | 2,683         | 2,748         | 2,810         | 2,867         | 2,919         | 2,966         | 3,008         |
| Cirrhosis                            | Diagnosed | 570           | 625           | 682           | 740           | 800           | 862           | 924           | 987           | 1,051         | 1,115         |
| HCC                                  | Diagnosed | 7             | 8             | 8             | 9             | 10            | 11            | 11            | 12            | 13            | 14            |
| Liver Failure                        | Diagnosed | 24            | 27            | 29            | 31            | 34            | 36            | 39            | 42            | 44            | 47            |
| <b>Total Diag. HCV Cases Avoided</b> |           | 9,124         | 9,109         | 9,100         | 9,097         | 9,103         | 9,116         | 9,125         | 9,133         | 9,137         | 9,139         |
| <b>Whole of HCV Episode Costs</b>    |           | \$444,248     | \$440,391     | \$436,846     | \$433,510     | \$430,487     | \$427,777     | \$424,858     | \$421,783     | \$418,499     | \$415,059     |
| <b>Annual Treatment Costs-HCV</b>    |           |               |               |               |               |               |               |               |               |               |               |
| Stage 0/1                            | Diagnosed | \$1,228,962   | \$1,198,715   | \$1,170,295   | \$1,143,702   | \$1,118,733   | \$1,095,591   | \$1,072,652   | \$1,050,119   | \$1,027,789   | \$1,005,865   |
| Stage 2/3                            | Diagnosed | \$501,207     | \$516,432     | \$531,048     | \$544,649     | \$557,844     | \$570,430     | \$582,001     | \$592,557     | \$602,098     | \$610,624     |
| Cirrhosis                            | Diagnosed | \$216,600     | \$237,500     | \$259,160     | \$281,200     | \$304,000     | \$327,560     | \$351,120     | \$375,060     | \$399,380     | \$423,700     |
| HCC                                  | Diagnosed | \$705,388     | \$806,158     | \$806,158     | \$906,927     | \$1,007,697   | \$1,108,467   | \$1,108,467   | \$1,209,236   | \$1,310,006   | \$1,410,776   |
| Liver Failure                        | Diagnosed | \$4,010,626   | \$4,511,954   | \$4,846,173   | \$5,180,392   | \$5,681,720   | \$6,015,939   | \$6,517,267   | \$7,018,595   | \$7,352,814   | \$7,854,142   |
| <b>Total HCV Costs Avoided</b>       |           | \$7,107,030   | \$7,711,149   | \$8,049,680   | \$8,490,380   | \$9,100,481   | \$9,545,763   | \$10,056,364  | \$10,667,350  | \$11,110,586  | \$11,720,166  |
| <b>Total Costs Avoided HIV + HCV</b> |           | \$261,430,769 | \$252,775,568 | \$242,751,305 | \$232,222,147 | \$221,556,858 | \$210,702,145 | \$200,122,323 | \$189,967,953 | \$180,072,270 | \$170,822,790 |

|                                      |           | 2021          | 2022          | 2023          | 2024          | 2025          | 2026          | 2027          | 2028         | 2029         | 2030         |
|--------------------------------------|-----------|---------------|---------------|---------------|---------------|---------------|---------------|---------------|--------------|--------------|--------------|
| <b>NSP Expenditure</b>               |           |               |               |               |               |               |               |               |              |              |              |
| Total Govt NSP Expend                |           |               |               |               |               |               |               |               |              |              |              |
| All NSP Expend                       |           |               |               |               |               |               |               |               |              |              |              |
| <b>HIV Effects - Cases Avoided</b>   |           |               |               |               |               |               |               |               |              |              |              |
| CD4 >500                             | Diagnosed | 2             | 1             | 1             | 0             | 0             | 0             | 0             | 0            | 0            | 0            |
| CD4 <500                             | Diagnosed | 7,219         | 6,784         | 6,371         | 5,980         | 5,610         | 5,258         | 4,925         | 4,608        | 4,307        | 4,021        |
| AIDS                                 | Diagnosed | 1,747         | 1,644         | 1,546         | 1,453         | 1,365         | 1,281         | 1,202         | 1,127        | 1,056        | 988          |
| <b>Total Diag. HIV Cases Avoided</b> |           | 8,968         | 8,429         | 7,918         | 7,433         | 6,975         | 6,539         | 6,127         | 5,735        | 5,363        | 5,009        |
| <b>Annual Treatment Costs-HIV</b>    |           |               |               |               |               |               |               |               |              |              |              |
| CD4>500                              |           | \$10,340      | \$5,170       | \$5,170       | \$0           | \$0           | \$0           | \$0           | \$0          | \$0          | \$0          |
| CD4<500                              |           | \$62,473,226  | \$58,708,736  | \$55,134,634  | \$51,750,920  | \$48,548,940  | \$45,502,732  | \$42,620,950  | \$39,877,632 | \$37,272,778 | \$34,797,734 |
| AIDS                                 |           | \$87,239,857  | \$82,096,351  | \$77,202,530  | \$72,558,393  | \$68,163,941  | \$63,969,237  | \$60,024,218  | \$56,278,946 | \$52,733,423 | \$49,337,710 |
| <b>Total HIV Costs Avoided</b>       |           | \$149,723,423 | \$140,810,257 | \$132,342,334 | \$124,309,313 | \$116,712,881 | \$109,471,969 | \$102,645,168 | \$96,156,578 | \$90,006,201 | \$84,135,444 |

|                                      |           | 2021          | 2022          | 2023          | 2024          | 2025          | 2026          | 2027          | 2028          | 2029          | 2030          |
|--------------------------------------|-----------|---------------|---------------|---------------|---------------|---------------|---------------|---------------|---------------|---------------|---------------|
| <b>HCV Effects - Cases Avoided</b>   |           |               |               |               |               |               |               |               |               |               |               |
| Stage 0/1                            | Diagnosed | 4,847         | 4,741         | 4,635         | 4,530         | 4,425         | 4,321         | 4,216         | 4,112         | 4,007         | 3,902         |
| Stage 2/3                            | Diagnosed | 3,046         | 3,079         | 3,107         | 3,131         | 3,149         | 3,163         | 3,172         | 3,176         | 3,175         | 3,168         |
| Cirrhosis                            | Diagnosed | 1,179         | 1,243         | 1,306         | 1,369         | 1,432         | 1,493         | 1,552         | 1,611         | 1,667         | 1,721         |
| HCC                                  | Diagnosed | 14            | 15            | 16            | 17            | 18            | 18            | 19            | 20            | 20            | 21            |
| Liver Failure                        | Diagnosed | 49            | 52            | 55            | 57            | 60            | 62            | 65            | 67            | 69            | 71            |
| <b>Total Diag. HCV Cases Avoided</b> |           | 9,135         | 9,130         | 9,119         | 9,104         | 9,084         | 9,057         | 9,024         | 8,986         | 8,938         | 8,883         |
| <b>Whole of HCV Episode Costs</b>    |           | \$411,410     | \$407,605     | \$403,539     | \$399,317     | \$394,783     | \$390,092     | \$385,088     | \$379,875     | \$374,350     | \$368,512     |
| <b>Annual Treatment Costs-HCV</b>    |           |               |               |               |               |               |               |               |               |               |               |
| Stage 0/1                            | Diagnosed | \$983,941     | \$962,423     | \$940,905     | \$919,590     | \$898,275     | \$877,163     | \$855,848     | \$834,736     | \$813,421     | \$792,106     |
| Stage 2/3                            | Diagnosed | \$618,338     | \$625,037     | \$630,721     | \$635,593     | \$639,247     | \$642,089     | \$643,916     | \$644,728     | \$644,525     | \$643,104     |
| Cirrhosis                            | Diagnosed | \$448,020     | \$472,340     | \$496,280     | \$520,220     | \$544,160     | \$567,340     | \$589,760     | \$612,180     | \$633,460     | \$653,980     |
| HCC                                  | Diagnosed | \$1,410,776   | \$1,511,545   | \$1,612,315   | \$1,713,085   | \$1,813,854   | \$1,813,854   | \$1,914,624   | \$2,015,394   | \$2,015,394   | \$2,116,164   |
| Liver Failure                        | Diagnosed | \$8,188,361   | \$8,689,689   | \$9,191,017   | \$9,525,236   | \$10,026,565  | \$10,360,783  | \$10,862,112  | \$11,196,330  | \$11,530,549  | \$11,864,768  |
| <b>Total HCV Costs Avoided</b>       |           | \$12,060,846  | \$12,668,640  | \$13,274,778  | \$13,713,041  | \$14,316,884  | \$14,651,321  | \$15,251,347  | \$15,683,244  | \$16,011,699  | \$16,438,634  |
| <b>Total Costs Avoided HIV + HCV</b> |           | \$161,784,269 | \$153,478,897 | \$145,617,112 | \$138,022,355 | \$131,029,765 | \$124,123,291 | \$117,896,515 | \$111,839,822 | \$106,017,900 | \$100,574,078 |

|                                      | 2031      | 2032         | 2033         | 2034         | 2035         | 2036         | 2037         | 2038         | 2039         | 2040         |              |
|--------------------------------------|-----------|--------------|--------------|--------------|--------------|--------------|--------------|--------------|--------------|--------------|--------------|
| <b>NSP Expenditure</b>               |           |              |              |              |              |              |              |              |              |              |              |
| Total Govt NSP Expend                |           |              |              |              |              |              |              |              |              |              |              |
| All NSP Expend                       |           |              |              |              |              |              |              |              |              |              |              |
| <b>HIV Effects - Cases Avoided</b>   |           |              |              |              |              |              |              |              |              |              |              |
| CD4 >500                             | Diagnosed | 0            | 0            | 0            | 0            | 0            | 0            | 0            | 0            | 0            |              |
| CD4 <500                             | Diagnosed | 3,750        | 3,492        | 3,248        | 3,016        | 2,796        | 2,587        | 2,388        | 2,199        | 2,021        | 1,851        |
| AIDS                                 | Diagnosed | 924          | 864          | 806          | 751          | 699          | 650          | 603          | 558          | 516          | 476          |
| <b>Total Diag. HIV Cases Avoided</b> |           | 4,674        | 4,356        | 4,054        | 3,767        | 3,495        | 3,237        | 2,991        | 2,757        | 2,537        | 2,327        |
| <b>Annual Treatment Costs-HIV</b>    |           |              |              |              |              |              |              |              |              |              |              |
| CD4>500                              |           | \$0          | \$0          | \$0          | \$0          | \$0          | \$0          | \$0          | \$0          | \$0          | \$0          |
| CD4<500                              |           | \$32,452,500 | \$30,219,768 | \$28,108,192 | \$26,100,464 | \$24,196,584 | \$22,387,898 | \$20,665,752 | \$19,030,146 | \$17,489,734 | \$16,018,554 |
| AIDS                                 |           | \$46,141,745 | \$43,145,528 | \$40,249,184 | \$37,502,652 | \$34,905,930 | \$32,459,020 | \$30,111,983 | \$27,864,820 | \$25,767,468 | \$23,769,990 |
| <b>Total HIV Costs Avoided</b>       |           | \$78,594,245 | \$73,365,296 | \$68,357,376 | \$63,603,116 | \$59,102,514 | \$54,846,918 | \$50,777,735 | \$46,894,966 | \$43,257,202 | \$39,788,544 |

|                                      |           | 2031         | 2032         | 2033         | 2034         | 2035         | 2036         | 2037         | 2038         | 2039         | 2040         |
|--------------------------------------|-----------|--------------|--------------|--------------|--------------|--------------|--------------|--------------|--------------|--------------|--------------|
| <b>HCV Effects - Cases Avoided</b>   |           |              |              |              |              |              |              |              |              |              |              |
| Stage 0/1                            | Diagnosed | 3,796        | 3,690        | 3,582        | 3,474        | 3,364        | 3,253        | 3,140        | 3,026        | 2,911        | 2,793        |
| Stage 2/3                            | Diagnosed | 3,157        | 3,140        | 3,117        | 3,089        | 3,055        | 3,015        | 2,969        | 2,917        | 2,859        | 2,794        |
| Cirrhosis                            | Diagnosed | 1,772        | 1,820        | 1,865        | 1,906        | 1,943        | 1,975        | 2,002        | 2,023        | 2,038        | 2,047        |
| HCC                                  | Diagnosed | 22           | 22           | 23           | 23           | 24           | 24           | 25           | 25           | 25           | 25           |
| Liver Failure                        | Diagnosed | 74           | 75           | 77           | 79           | 80           | 81           | 82           | 83           | 84           | 84           |
| <b>Total Diag. HCV Cases Avoided</b> |           | 8,821        | 8,747        | 8,664        | 8,571        | 8,466        | 8,348        | 8,218        | 8,074        | 7,917        | 7,743        |
| <b>Whole of HCV Episode Costs</b>    |           | \$362,414    | \$356,003    | \$349,175    | \$342,086    | \$334,580    | \$326,709    | \$318,422    | \$309,769    | \$300,752    | \$291,213    |
| <b>Annual Treatment Costs-HCV</b>    |           |              |              |              |              |              |              |              |              |              |              |
| Stage 0/1                            |           | \$770,588    | \$749,070    | \$727,146    | \$705,222    | \$682,892    | \$660,359    | \$637,420    | \$614,278    | \$590,933    | \$566,979    |
| Stage 2/3                            |           | \$640,871    | \$637,420    | \$632,751    | \$627,067    | \$620,165    | \$612,045    | \$602,707    | \$592,151    | \$580,377    | \$567,182    |
| Cirrhosis                            |           | \$673,360    | \$691,600    | \$708,700    | \$724,280    | \$738,340    | \$750,500    | \$760,760    | \$768,740    | \$774,440    | \$777,860    |
| HCC                                  |           | \$2,216,933  | \$2,216,933  | \$2,317,703  | \$2,317,703  | \$2,418,473  | \$2,418,473  | \$2,519,242  | \$2,519,242  | \$2,519,242  | \$2,519,242  |
| Liver Failure                        |           | \$12,366,096 | \$12,533,206 | \$12,867,424 | \$13,201,643 | \$13,368,753 | \$13,535,862 | \$13,702,972 | \$13,870,081 | \$14,037,190 | \$14,037,190 |
| <b>Total HCV Costs Avoided</b>       |           | \$17,030,262 | \$17,184,232 | \$17,602,899 | \$17,918,001 | \$18,163,202 | \$18,303,948 | \$18,541,523 | \$18,674,262 | \$18,802,935 | \$18,759,667 |
| <b>Total Costs Avoided HIV + HCV</b> |           | \$95,624,507 | \$90,549,527 | \$85,960,275 | \$81,521,117 | \$77,265,717 | \$73,150,866 | \$69,319,258 | \$65,569,228 | \$62,060,137 | \$58,548,211 |



|                                      | 2041      | 2042         | 2043         | 2044         | 2045         | 2046         | 2047         | 2048         | 2049         | 2050         |
|--------------------------------------|-----------|--------------|--------------|--------------|--------------|--------------|--------------|--------------|--------------|--------------|
| <b>NSP Expenditure</b>               |           |              |              |              |              |              |              |              |              |              |
| Total Govt NSP Expend                |           |              |              |              |              |              |              |              |              |              |
| All NSP Expend                       |           |              |              |              |              |              |              |              |              |              |
| <b>HIV Effects - Cases Avoided</b>   |           |              |              |              |              |              |              |              |              |              |
| CD4 >500                             | Diagnosed | 0            | 0            | 0            | 0            | 0            | 0            | 0            | 0            | 0            |
| CD4 <500                             | Diagnosed | 1,690        | 1,539        | 1,395        | 1,260        | 1,132        | 1,013        | 901          | 796          | 699          |
| AIDS                                 | Diagnosed | 438          | 402          | 368          | 336          | 305          | 276          | 249          | 224          | 200          |
| <b>Total Diag. HIV Cases Avoided</b> |           | 2,128        | 1,941        | 1,763        | 1,596        | 1,437        | 1,289        | 1,150        | 1,020        | 899          |
| <b>Annual Treatment Costs-HIV</b>    |           |              |              |              |              |              |              |              |              |              |
| CD4>500                              |           | \$0          | \$0          | \$0          | \$0          | \$0          | \$0          | \$0          | \$0          | \$0          |
| CD4<500                              |           | \$14,625,260 | \$13,318,506 | \$12,072,330 | \$10,904,040 | \$9,796,328  | \$8,766,502  | \$7,797,254  | \$6,888,584  | \$6,049,146  |
| AIDS                                 |           | \$21,872,386 | \$20,074,655 | \$18,376,799 | \$16,778,816 | \$15,230,771 | \$13,782,599 | \$12,434,301 | \$11,185,878 | \$9,987,391  |
| <b>Total HIV Costs Avoided</b>       |           | \$36,497,646 | \$33,393,161 | \$30,449,129 | \$27,682,856 | \$25,027,099 | \$22,549,101 | \$20,231,555 | \$18,074,462 | \$16,036,537 |

|                                      |           | 2041         | 2042         | 2043         | 2044         | 2045         | 2046         | 2047         | 2048         | 2049         | 2050         |
|--------------------------------------|-----------|--------------|--------------|--------------|--------------|--------------|--------------|--------------|--------------|--------------|--------------|
| <b>HCV Effects - Cases Avoided</b>   |           |              |              |              |              |              |              |              |              |              |              |
| Stage 0/1                            | Diagnosed | 2,674        | 2,554        | 2,432        | 2,308        | 2,183        | 2,057        | 1,930        | 1,803        | 1,675        | 1,548        |
| Stage 2/3                            | Diagnosed | 2,723        | 2,645        | 2,561        | 2,471        | 2,375        | 2,272        | 2,164        | 2,051        | 1,933        | 1,811        |
| Cirrhosis                            | Diagnosed | 2,048        | 2,042        | 2,029        | 2,007        | 1,976        | 1,937        | 1,889        | 1,832        | 1,766        | 1,691        |
| HCC                                  | Diagnosed | 25           | 25           | 25           | 25           | 24           | 24           | 23           | 22           | 22           | 21           |
| Liver Failure                        | Diagnosed | 84           | 83           | 83           | 82           | 80           | 78           | 76           | 74           | 71           | 68           |
| <b>Total Diag. HCV Cases Avoided</b> |           | 7,554        | 7,349        | 7,130        | 6,893        | 6,638        | 6,368        | 6,082        | 5,782        | 5,467        | 5,139        |
| <b>Whole of HCV Episode Costs</b>    |           | \$281,310    | \$270,990    | \$260,252    | \$249,098    | \$237,578    | \$225,642    | \$213,393    | \$200,884    | \$188,061    | \$175,082    |
| <b>Annual Treatment Costs-HCV</b>    |           |              |              |              |              |              |              |              |              |              |              |
| Stage 0/1                            |           | \$542,822    | \$518,462    | \$493,696    | \$468,524    | \$443,149    | \$417,571    | \$391,790    | \$366,009    | \$340,025    | \$314,244    |
| Stage 2/3                            |           | \$552,769    | \$536,935    | \$519,883    | \$501,613    | \$482,125    | \$461,216    | \$439,292    | \$416,353    | \$392,399    | \$367,633    |
| Cirrhosis                            |           | \$778,240    | \$775,960    | \$771,020    | \$762,660    | \$750,880    | \$736,060    | \$717,820    | \$696,160    | \$671,080    | \$642,580    |
| HCC                                  |           | \$2,519,242  | \$2,519,242  | \$2,519,242  | \$2,519,242  | \$2,418,473  | \$2,418,473  | \$2,317,703  | \$2,216,933  | \$2,216,933  | \$2,116,164  |
| Liver Failure                        |           | \$14,037,190 | \$13,870,081 | \$13,870,081 | \$13,702,972 | \$13,368,753 | \$13,034,534 | \$12,700,315 | \$12,366,096 | \$11,864,768 | \$11,363,440 |
| <b>Total HCV Costs Avoided</b>       |           | \$18,711,574 | \$18,491,670 | \$18,434,174 | \$18,204,109 | \$17,700,958 | \$17,293,496 | \$16,780,313 | \$16,262,435 | \$15,673,267 | \$14,979,143 |
| <b>Total Costs Avoided HIV + HCV</b> |           | \$55,209,219 | \$51,884,831 | \$48,883,303 | \$45,886,965 | \$42,728,057 | \$39,842,597 | \$37,011,869 | \$34,336,897 | \$31,709,803 | \$29,138,207 |

|                                      | 2051      | 2052         | 2053         | 2054        | 2055        | 2056        | 2057        | 2058        | 2059        | 2060        |
|--------------------------------------|-----------|--------------|--------------|-------------|-------------|-------------|-------------|-------------|-------------|-------------|
| <b>NSP Expenditure</b>               |           |              |              |             |             |             |             |             |             |             |
| Total Govt NSP Expend                |           |              |              |             |             |             |             |             |             |             |
| All NSP Expend                       |           |              |              |             |             |             |             |             |             |             |
| <b>HIV Effects - Cases Avoided</b>   |           |              |              |             |             |             |             |             |             |             |
| CD4 >500                             | Diagnosed | 0            | 0            | 0           | 0           | 0           | 0           | 0           | 0           | 0           |
| CD4 <500                             | Diagnosed | 526          | 451          | 382         | 320         | 265         | 217         | 175         | 139         | 109         |
| AIDS                                 | Diagnosed | 157          | 137          | 119         | 103         | 88          | 75          | 63          | 52          | 42          |
| <b>Total Diag. HIV Cases Avoided</b> |           | 683          | 588          | 501         | 423         | 353         | 292         | 238         | 191         | 151         |
| <b>Annual Treatment Costs-HIV</b>    |           |              |              |             |             |             |             |             |             |             |
| CD4>500                              |           | \$0          | \$0          | \$0         | \$0         | \$0         | \$0         | \$0         | \$0         | \$0         |
| CD4<500                              |           | \$4,552,004  | \$3,902,954  | \$3,305,828 | \$2,769,280 | \$2,293,310 | \$1,877,918 | \$1,514,450 | \$1,202,906 | \$943,286   |
| AIDS                                 |           | \$7,840,102  | \$6,841,363  | \$5,942,497 | \$5,143,506 | \$4,394,452 | \$3,745,272 | \$3,146,028 | \$2,596,722 | \$2,097,352 |
| <b>Total HIV Costs Avoided</b>       |           | \$12,392,106 | \$10,744,317 | \$9,248,325 | \$7,912,786 | \$6,687,762 | \$5,623,190 | \$4,660,478 | \$3,799,628 | \$3,040,638 |

|                                      |           | 2051         | 2052         | 2053         | 2054         | 2055         | 2056         | 2057         | 2058         | 2059        | 2060        |
|--------------------------------------|-----------|--------------|--------------|--------------|--------------|--------------|--------------|--------------|--------------|-------------|-------------|
| <b>HCV Effects - Cases Avoided</b>   |           |              |              |              |              |              |              |              |              |             |             |
| Stage 0/1                            | Diagnosed | 1,422        | 1,297        | 1,176        | 1,057        | 942          | 832          | 728          | 631          | 541         | 458         |
| Stage 2/3                            | Diagnosed | 1,686        | 1,559        | 1,431        | 1,302        | 1,175        | 1,051        | 930          | 815          | 706         | 605         |
| Cirrhosis                            | Diagnosed | 1,609        | 1,519        | 1,423        | 1,322        | 1,217        | 1,110        | 1,001        | 894          | 789         | 689         |
| HCC                                  | Diagnosed | 20           | 19           | 17           | 16           | 15           | 14           | 12           | 11           | 10          | 8           |
| Liver Failure                        | Diagnosed | 64           | 60           | 56           | 52           | 48           | 43           | 39           | 34           | 30          | 26          |
| <b>Total Diag. HCV Cases Avoided</b> |           | 4,801        | 4,454        | 4,103        | 3,749        | 3,397        | 3,050        | 2,710        | 2,385        | 2,076       | 1,786       |
| <b>Whole of HCV Episode Costs</b>    |           | \$162,000    | \$148,864    | \$135,886    | \$122,959    | \$110,345    | \$98,148     | \$86,421     | \$75,370     | \$64,998    | \$55,407    |
| <b>Annual Treatment Costs-HCV</b>    |           |              |              |              |              |              |              |              |              |             |             |
| Stage 0/1                            |           | \$288,666    | \$263,291    | \$238,728    | \$214,571    | \$191,226    | \$168,896    | \$147,784    | \$128,093    | \$109,823   | \$92,974    |
| Stage 2/3                            |           | \$342,258    | \$316,477    | \$290,493    | \$264,306    | \$238,525    | \$213,353    | \$188,790    | \$165,445    | \$143,318   | \$122,815   |
| Cirrhosis                            |           | \$611,420    | \$577,220    | \$540,740    | \$502,360    | \$462,460    | \$421,800    | \$380,380    | \$339,720    | \$299,820   | \$261,820   |
| HCC                                  |           | \$2,015,394  | \$1,914,624  | \$1,713,085  | \$1,612,315  | \$1,511,545  | \$1,410,776  | \$1,209,236  | \$1,108,467  | \$1,007,697 | \$806,158   |
| Liver Failure                        |           | \$10,695,002 | \$10,026,565 | \$9,358,127  | \$8,689,689  | \$8,021,252  | \$7,185,705  | \$6,517,267  | \$5,681,720  | \$5,013,282 | \$4,344,845 |
| <b>Total HCV Costs Avoided</b>       |           | \$14,114,740 | \$13,247,041 | \$12,277,058 | \$11,406,200 | \$10,535,353 | \$9,498,678  | \$8,529,878  | \$7,498,815  | \$6,638,938 | \$5,684,018 |
| <b>Total Costs Avoided HIV + HCV</b> |           | \$26,506,845 | \$23,991,358 | \$21,525,384 | \$19,318,987 | \$17,223,115 | \$15,121,867 | \$13,190,356 | \$11,298,443 | \$9,679,576 | \$8,108,811 |

|                                      | 2061      | 2062        | 2063        | 2064        | 2065      | 2066      | 2067      | 2068      | 2069      | 2070     |
|--------------------------------------|-----------|-------------|-------------|-------------|-----------|-----------|-----------|-----------|-----------|----------|
| <b>NSP Expenditure</b>               |           |             |             |             |           |           |           |           |           |          |
| Total Govt NSP Expend                |           |             |             |             |           |           |           |           |           |          |
| All NSP Expend                       |           |             |             |             |           |           |           |           |           |          |
| <b>HIV Effects - Cases Avoided</b>   |           |             |             |             |           |           |           |           |           |          |
| CD4 >500                             | Diagnosed | 0           | 0           | 0           | 0         | 0         | 0         | 0         | 0         | 0        |
| CD4 <500                             | Diagnosed | 63          | 47          | 35          | 25        | 18        | 12        | 8         | 5         | 2        |
| AIDS                                 | Diagnosed | 27          | 21          | 16          | 12        | 8         | 6         | 4         | 2         | 1        |
| <b>Total Diag. HIV Cases Avoided</b> |           | 90          | 68          | 51          | 37        | 26        | 18        | 12        | 7         | 3        |
| <b>Annual Treatment Costs-HIV</b>    |           |             |             |             |           |           |           |           |           |          |
| CD4>500                              |           | \$0         | \$0         | \$0         | \$0       | \$0       | \$0       | \$0       | \$0       | \$0      |
| CD4<500                              |           | \$545,202   | \$406,738   | \$302,890   | \$216,350 | \$155,772 | \$103,848 | \$69,232  | \$43,270  | \$17,308 |
| AIDS                                 |           | \$1,348,298 | \$1,048,676 | \$798,991   | \$599,243 | \$399,496 | \$299,622 | \$199,748 | \$99,874  | \$49,937 |
| <b>Total HIV Costs Avoided</b>       |           | \$1,893,500 | \$1,455,414 | \$1,101,881 | \$815,593 | \$555,268 | \$403,470 | \$268,980 | \$143,144 | \$67,245 |

|                                      |           | 2061        | 2062        | 2063        | 2064        | 2065        | 2066        | 2067        | 2068        | 2069      | 2070      |
|--------------------------------------|-----------|-------------|-------------|-------------|-------------|-------------|-------------|-------------|-------------|-----------|-----------|
| <b>HCV Effects - Cases Avoided</b>   |           |             |             |             |             |             |             |             |             |           |           |
| Stage 0/1                            | Diagnosed | 383         | 316         | 256         | 204         | 160         | 124         | 94          | 70          | 51        | 36        |
| Stage 2/3                            | Diagnosed | 511         | 427         | 349         | 281         | 223         | 173         | 133         | 99          | 73        | 52        |
| Cirrhosis                            | Diagnosed | 593         | 504         | 420         | 344         | 277         | 219         | 170         | 130         | 97        | 70        |
| HCC                                  | Diagnosed | 7           | 6           | 5           | 4           | 3           | 3           | 2           | 2           | 1         | 1         |
| Liver Failure                        | Diagnosed | 22          | 19          | 15          | 12          | 10          | 8           | 6           | 4           | 3         | 2         |
| <b>Total Diag. HCV Cases Avoided</b> |           | 1,516       | 1,272       | 1,045       | 845         | 673         | 527         | 405         | 305         | 225       | 161       |
| <b>Whole of HCV Episode Costs</b>    |           | \$46,598    | \$38,728    | \$31,535    | \$25,280    | \$19,963    | \$15,481    | \$11,832    | \$8,809     | \$6,463   | \$4,587   |
| <b>Annual Treatment Costs-HCV</b>    |           |             |             |             |             |             |             |             |             |           |           |
| Stage 0/1                            |           | \$77,749    | \$64,148    | \$51,968    | \$41,412    | \$32,480    | \$25,172    | \$19,082    | \$14,210    | \$10,353  | \$7,308   |
| Stage 2/3                            |           | \$103,733   | \$86,681    | \$70,847    | \$57,043    | \$45,269    | \$35,119    | \$26,999    | \$20,097    | \$14,819  | \$10,556  |
| Cirrhosis                            |           | \$225,340   | \$191,520   | \$159,600   | \$130,720   | \$105,260   | \$83,220    | \$64,600    | \$49,400    | \$36,860  | \$26,600  |
| HCC                                  |           | \$705,388   | \$604,618   | \$503,848   | \$403,079   | \$302,309   | \$302,309   | \$201,539   | \$201,539   | \$100,770 | \$100,770 |
| Liver Failure                        |           | \$3,676,407 | \$3,175,079 | \$2,506,641 | \$2,005,313 | \$1,671,094 | \$1,336,875 | \$1,002,656 | \$668,438   | \$501,328 | \$334,219 |
| <b>Total HCV Costs Avoided</b>       |           | \$4,835,215 | \$4,160,774 | \$3,324,439 | \$2,662,847 | \$2,176,375 | \$1,798,176 | \$1,326,709 | \$962,493   | \$670,593 | \$484,039 |
| <b>Total Costs Avoided HIV + HCV</b> |           | \$6,728,715 | \$5,616,188 | \$4,426,321 | \$3,478,440 | \$2,731,643 | \$2,201,646 | \$1,595,689 | \$1,105,637 | \$737,838 | \$484,039 |

|                                      | 2071      | 2072 | 2073 | 2074 | 2075 | Total           |
|--------------------------------------|-----------|------|------|------|------|-----------------|
| <b>NSP Expenditure</b>               |           |      |      |      |      |                 |
| Total Govt NSP Expend                |           |      |      |      |      | -\$130,137,868  |
| All NSP Expend                       |           |      |      |      |      | -\$149,944,423  |
| <b>HIV Effects - Cases Avoided</b>   |           |      |      |      |      |                 |
| CD4 >500                             | Diagnosed |      |      |      |      | 96,422          |
| CD4 <500                             | Diagnosed |      |      |      |      | 344,734         |
| AIDS                                 | Diagnosed |      |      |      |      | 71,410          |
| <b>Total Diag. HIV Cases Avoided</b> |           |      |      |      |      | 512,566         |
| <b>Annual Treatment Costs-HIV</b>    |           |      |      |      |      |                 |
| CD4>500                              |           |      |      |      |      | \$470,016,453   |
| CD4<500                              |           |      |      |      |      | \$2,973,533,547 |
| AIDS                                 |           |      |      |      |      | \$3,582,173,445 |
| <b>Total HIV Costs Avoided</b>       |           |      |      |      |      | \$7,025,723,445 |
| <b>Net Govt Expenditure/Savings</b>  |           |      |      |      |      | \$6,895,585,578 |
| <b>Net All Expend/Savings</b>        |           |      |      |      |      | \$6,875,779,022 |

|                                      |           | 2071      | 2072      | 2073     | 2074    | 2075 | Total           |
|--------------------------------------|-----------|-----------|-----------|----------|---------|------|-----------------|
| <b>HCV Effects - Cases Avoided</b>   |           |           |           |          |         |      |                 |
| Stage 0/1                            | Diagnosed | 24        | 15        | 9        | 4       | 0    | 285,367         |
| Stage 2/3                            | Diagnosed | 35        | 23        | 13       | 6       | 0    | 150,916         |
| Cirrhosis                            | Diagnosed | 48        | 31        | 18       | 8       | 0    | 79,585          |
| HCC                                  | Diagnosed | 1         | 0         | 0        | 0       | 0    | 975             |
| Liver Failure                        | Diagnosed | 1         | 1         | 0        | 0       | 0    | 3,248           |
| <b>Total Diag. HCV Cases Avoided</b> |           | 109       | 70        | 40       | 18      | 0    | 520,091         |
| <br>                                 |           |           |           |          |         |      |                 |
| <b>Whole of HCV Episode Costs</b>    |           | \$3,075   | \$1,981   | \$1,147  | \$521   | \$0  | \$22,740,552    |
| <br>                                 |           |           |           |          |         |      |                 |
| <b>Annual Treatment Costs-HCV</b>    |           |           |           |          |         |      |                 |
| Stage 0/1                            |           | \$4,872   | \$3,045   | \$1,827  | \$812   | \$0  | \$57,929,501    |
| Stage 2/3                            |           | \$7,105   | \$4,669   | \$2,639  | \$1,218 | \$0  | \$30,635,948    |
| Cirrhosis                            |           | \$18,240  | \$11,780  | \$6,840  | \$3,040 | \$0  | \$30,242,300    |
| HCC                                  |           | \$100,770 | \$0       | \$0      | \$0     | \$0  | \$98,250,451    |
| Liver Failure                        |           | \$167,109 | \$167,109 | \$0      | \$0     | \$0  | \$542,771,360   |
| <b>Total HCV Costs Avoided</b>       |           | \$301,171 | \$188,584 | \$12,453 | \$5,591 | \$0  | \$782,570,112   |
| <b>Total Costs Avoided HIV + HCV</b> |           | \$301,171 | \$188,584 | \$12,453 | \$5,591 | \$0  | \$7,808,293,558 |
| <b>Net Govt Expenditure/Savings</b>  |           | \$301,171 | \$188,584 | \$12,453 | \$5,591 | \$0  | \$7,678,155,690 |
| <b>Net All Expend/Savings</b>        |           | \$301,171 | \$188,584 | \$12,453 | \$5,591 | \$0  | \$7,658,349,135 |





---

## **APPENDIX E**

### **DETAILED TABLES ON QUALITY OF LIFE EFFECTS OF NSPs**

| Year                               |             | 1991 | 1992  | 1993  | 1994  | 1995  | 1996  | 1997  | 1998   | 1999   | 2000   |
|------------------------------------|-------------|------|-------|-------|-------|-------|-------|-------|--------|--------|--------|
| <b>HIV</b>                         |             |      |       |       |       |       |       |       |        |        |        |
| <b>Survivors without HIV</b>       |             | 786  | 1,309 | 2,070 | 3,153 | 4,684 | 6,828 | 9,797 | 13,853 | 19,304 | 26,488 |
| <b>Survivors with HIV</b>          |             |      |       |       |       |       |       |       |        |        |        |
| CD4 >500                           | Diagnosed   | 544  | 887   | 1,369 | 2,033 | 2,950 | 4,213 | 5,935 | 8,255  | 11,320 | 15,277 |
| CD4 >500                           | Undiagnosed | 136  | 222   | 342   | 508   | 738   | 1,053 | 1,484 | 2,064  | 2,830  | 3,819  |
| CD4 <500                           | Diagnosed   | 47   | 107   | 210   | 373   | 616   | 1,004 | 1,573 | 2,399  | 3,585  | 5,266  |
| CD4 <500                           | Undiagnosed | 5    | 12    | 23    | 41    | 68    | 112   | 175   | 267    | 398    | 585    |
| AIDS                               | Diagnosed   | 10   | 23    | 44    | 78    | 131   | 192   | 278   | 393    | 540    | 725    |
| <b>Total</b>                       |             | 742  | 1,251 | 1,988 | 3,033 | 4,503 | 6,574 | 9,445 | 13,378 | 18,673 | 25,672 |
| <b>Life Years Gained</b>           |             | 44   | 58    | 82    | 120   | 181   | 254   | 352   | 475    | 631    | 816    |
| <b>Quality Adjusted Life Years</b> |             |      |       |       |       |       |       |       |        |        |        |
| CD4 >500                           | Diagnosed   | 473  | 772   | 1,191 | 1,769 | 2,567 | 3,665 | 5,163 | 7,182  | 9,848  | 13,291 |
| CD4 >500                           | Undiagnosed | 128  | 209   | 321   | 478   | 694   | 990   | 1,395 | 1,940  | 2,660  | 3,590  |
| CD4 <500                           | Diagnosed   | 36   | 81    | 160   | 283   | 468   | 763   | 1,195 | 1,823  | 2,725  | 4,002  |
| CD4 <500                           | Undiagnosed | 5    | 11    | 21    | 37    | 61    | 101   | 158   | 240    | 358    | 527    |
| AIDS                               | Diagnosed   | 6    | 14    | 27    | 48    | 81    | 119   | 172   | 244    | 335    | 450    |
| <b>Total</b>                       |             | 648  | 1,087 | 1,720 | 2,615 | 3,871 | 5,638 | 8,084 | 11,429 | 15,926 | 21,859 |
| <b>HIV QALYs Gained</b>            |             | 138  | 222   | 350   | 538   | 814   | 1,190 | 1,713 | 2,424  | 3,378  | 4,629  |

| Year                               |                          | 1991  | 1992           | 1993       | 1994                     | 1995           | 1996           | 1997                     | 1998           | 1999   | 2000   |
|------------------------------------|--------------------------|-------|----------------|------------|--------------------------|----------------|----------------|--------------------------|----------------|--------|--------|
| <b>HCV</b>                         |                          |       |                |            |                          |                |                |                          |                |        |        |
| <b>Survivors without HCV</b>       |                          | 5,204 | 6,637          | 8,114      | 9,650                    | 11,256         | 12,949         | 14,738                   | 16,639         | 18,663 | 20,826 |
| <b>Survivors with HCV</b>          |                          |       |                |            |                          |                |                |                          |                |        |        |
| Not Chronic                        |                          | 1,300 | 1,658          | 2,028      | 2,412                    | 2,814          | 3,236          | 3,683                    | 4,158          | 4,665  | 5,205  |
| Stage 0/1                          | Diagnosed                | 2,233 | 2,822          | 3,419      | 4,031                    | 4,663          | 5,321          | 6,011                    | 6,737          | 7,505  | 8,321  |
| Stage 0/1                          | Undiagnosed              | 1,489 | 1,881          | 2,279      | 2,687                    | 3,108          | 3,547          | 4,007                    | 4,491          | 5,004  | 5,547  |
| Stage 2/3                          | Diagnosed                | 132   | 200            | 279        | 372                      | 477            | 595            | 727                      | 872            | 1,031  | 1,205  |
| Stage 2/3                          | Undiagnosed              | 44    | 67             | 93         | 124                      | 159            | 198            | 242                      | 291            | 344    | 402    |
| Cirrhosis                          | Diagnosed                | 3     | 6              | 11         | 18                       | 26             | 37             | 51                       | 68             | 88     | 112    |
| Cirrhosis                          | Undiagnosed              | 1     | 2              | 3          | 4                        | 7              | 9              | 13                       | 17             | 22     | 28     |
| HCC                                | Diagnosed                | 0     | 0              | 0          | 0                        | 0              | 0              | 1                        | 1              | 1      | 1      |
| Liver Failure                      | Diagnosed                | 0     | 0              | 1          | 1                        | 1              | 2              | 2                        | 3              | 4      | 5      |
| <b>Total</b>                       |                          | 5,202 | 6,636          | 8,112      | 9,648                    | 11,254         | 12,943         | 14,734                   | 16,634         | 18,659 | 20,820 |
| <b>Life Years Gained</b>           |                          | 2     | 1              | 2          | 2                        | 2              | 6              | 4                        | 5              | 4      | 6      |
| <b>Quality Adjusted Life Years</b> |                          |       |                |            |                          |                |                |                          |                |        |        |
| Not Chronic                        |                          | 1,300 | 1,658          | 2,028      | 2,412                    | 2,814          | 3,236          | 3,683                    | 4,158          | 4,665  | 5,205  |
| Stage 0/1                          | Diagnosed                | 1,831 | 2,314          | 2,804      | 3,305                    | 3,824          | 4,363          | 4,929                    | 5,524          | 6,154  | 6,823  |
| Stage 0/1                          | Undiagnosed              | 1,400 | 1,768          | 2,142      | 2,526                    | 2,922          | 3,334          | 3,767                    | 4,222          | 4,704  | 5,214  |
| Stage 2/3                          | Diagnosed                | 108   | 164            | 229        | 305                      | 391            | 488            | 596                      | 715            | 845    | 988    |
| Stage 2/3                          | Undiagnosed              | 41    | 63             | 87         | 117                      | 149            | 186            | 227                      | 274            | 323    | 378    |
| Cirrhosis                          | Diagnosed                | 2     | 4              | 7          | 13                       | 19             | 26             | 36                       | 47             | 61     | 78     |
| Cirrhosis                          | Undiagnosed              | 1     | 2              | 3          | 3                        | 6              | 8              | 11                       | 14             | 18     | 24     |
| HCC                                | Diagnosed                | 0     | 0              | 0          | 0                        | 0              | 0              | 0                        | 0              | 0      | 0      |
| Liver Failure                      | Diagnosed                | 0     | 0              | 0          | 0                        | 0              | 1              | 1                        | 1              | 1      | 2      |
| <b>Total</b>                       |                          | 4,683 | 5,973          | 7,300      | 8,681                    | 10,124         | 11,642         | 13,249                   | 14,955         | 16,773 | 18,712 |
| <b>HCV QALYs Gained</b>            |                          | 520   | 664            | 814        | 969                      | 1,132          | 1,307          | 1,489                    | 1,683          | 1,891  | 2,114  |
| <b>All Life Years Gained</b>       |                          | 45    | 59             | 84         | 122                      | 184            | 260            | 356                      | 479            | 636    | 821    |
| <b>All QALYs Gained</b>            |                          | 658   | 886            | 1,164      | 1,507                    | 1,945          | 2,497          | 3,202                    | 4,107          | 5,269  | 6,742  |
| <b>HIV</b>                         | <b>NPV All Years @5%</b> |       | <b>138,072</b> | <b>HCV</b> | <b>NPV All Years @5%</b> | <b>32,207</b>  | <b>HIV+HCV</b> | <b>NPV All Years @5%</b> | <b>170,279</b> |        |        |
|                                    | <b>NPV All Years @3%</b> |       | <b>248,364</b> |            | <b>NPV All Years @3%</b> | <b>50,041</b>  |                | <b>NPV All Years @3%</b> | <b>298,406</b> |        |        |
|                                    | <b>NPV All Years @0%</b> |       | <b>715,245</b> |            | <b>NPV All Years @0%</b> | <b>119,992</b> |                | <b>NPV All Years @0%</b> | <b>835,237</b> |        |        |

| Year                               |             | 2001   | 2002   | 2003   | 2004   | 2005   | 2006   | 2007   | 2008   | 2009   | 2010   |
|------------------------------------|-------------|--------|--------|--------|--------|--------|--------|--------|--------|--------|--------|
| <b>HIV</b>                         |             |        |        |        |        |        |        |        |        |        |        |
| <b>Survivors without HIV</b>       |             | 26,190 | 25,898 | 25,608 | 25,317 | 25,035 | 24,756 | 24,477 | 24,208 | 23,944 | 23,691 |
| <b>Survivors with HIV</b>          |             |        |        |        |        |        |        |        |        |        |        |
| CD4 >500                           | Diagnosed   | 12,681 | 9,833  | 7,142  | 4,896  | 3,230  | 2,105  | 1,363  | 876    | 560    | 356    |
| CD4 >500                           | Undiagnosed | 3,170  | 2,458  | 1,785  | 1,224  | 807    | 526    | 341    | 219    | 140    | 89     |
| CD4 <500                           | Diagnosed   | 7,551  | 10,027 | 12,247 | 13,901 | 14,865 | 15,196 | 15,094 | 14,733 | 14,210 | 13,603 |
| CD4 <500                           | Undiagnosed | 839    | 1,114  | 1,361  | 1,545  | 1,652  | 1,688  | 1,677  | 1,637  | 1,579  | 1,511  |
| AIDS                               | Diagnosed   | 946    | 1,219  | 1,521  | 1,834  | 2,130  | 2,392  | 2,602  | 2,746  | 2,828  | 2,849  |
| <b>Total</b>                       |             | 25,187 | 24,651 | 24,056 | 23,400 | 22,684 | 21,907 | 21,077 | 20,211 | 19,317 | 18,408 |
| <b>Life Years Gained</b>           |             | 1,003  | 1,247  | 1,552  | 1,917  | 2,351  | 2,849  | 3,400  | 3,997  | 4,627  | 5,283  |
| <b>Quality Adjusted Life Years</b> |             |        |        |        |        |        |        |        |        |        |        |
| CD4 >500                           | Diagnosed   | 11,032 | 8,555  | 6,214  | 4,260  | 2,810  | 1,831  | 1,186  | 762    | 487    | 310    |
| CD4 >500                           | Undiagnosed | 2,980  | 2,311  | 1,678  | 1,151  | 759    | 494    | 321    | 206    | 132    | 84     |
| CD4 <500                           | Diagnosed   | 5,739  | 7,621  | 9,308  | 10,565 | 11,297 | 11,549 | 11,471 | 11,197 | 10,800 | 10,338 |
| CD4 <500                           | Undiagnosed | 755    | 1,003  | 1,225  | 1,391  | 1,487  | 1,519  | 1,509  | 1,473  | 1,421  | 1,360  |
| AIDS                               | Diagnosed   | 587    | 756    | 943    | 1,137  | 1,321  | 1,483  | 1,613  | 1,703  | 1,753  | 1,766  |
| <b>Total</b>                       |             | 21,093 | 20,244 | 19,367 | 18,502 | 17,673 | 16,877 | 16,100 | 15,341 | 14,593 | 13,858 |
| <b>HIV QALYs Gained</b>            |             | 5,097  | 5,654  | 6,241  | 6,815  | 7,362  | 7,879  | 8,376  | 8,867  | 9,351  | 9,833  |

| <b>Year</b>                        |             | <b>2001</b> | <b>2002</b> | <b>2003</b> | <b>2004</b> | <b>2005</b> | <b>2006</b> | <b>2007</b> | <b>2008</b> | <b>2009</b> | <b>2010</b> |
|------------------------------------|-------------|-------------|-------------|-------------|-------------|-------------|-------------|-------------|-------------|-------------|-------------|
| <b>HCV</b>                         |             |             |             |             |             |             |             |             |             |             |             |
| <b>Survivors without HCV</b>       |             | 20,597      | 20,370      | 20,145      | 19,930      | 19,727      | 19,538      | 19,363      | 19,202      | 19,053      | 18,919      |
| <b>Survivors with HCV</b>          |             |             |             |             |             |             |             |             |             |             |             |
| Not Chronic                        |             | 5,148       | 5,091       | 5,035       | 4,981       | 4,930       | 4,883       | 4,840       | 4,799       | 4,762       | 4,728       |
| Stage 0/1                          | Diagnosed   | 8,068       | 7,823       | 7,586       | 7,359       | 7,143       | 6,937       | 6,741       | 6,556       | 6,379       | 6,212       |
| Stage 0/1                          | Undiagnosed | 5,379       | 5,216       | 5,058       | 4,906       | 4,762       | 4,625       | 4,494       | 4,370       | 4,253       | 4,142       |
| Stage 2/3                          | Diagnosed   | 1,367       | 1,516       | 1,654       | 1,782       | 1,901       | 2,012       | 2,116       | 2,213       | 2,304       | 2,389       |
| Stage 2/3                          | Undiagnosed | 456         | 505         | 551         | 594         | 634         | 671         | 705         | 738         | 768         | 796         |
| Cirrhosis                          | Diagnosed   | 139         | 170         | 204         | 241         | 281         | 324         | 369         | 416         | 465         | 517         |
| Cirrhosis                          | Undiagnosed | 35          | 43          | 51          | 60          | 70          | 81          | 92          | 104         | 116         | 129         |
| HCC                                | Diagnosed   | 2           | 2           | 3           | 3           | 3           | 4           | 5           | 5           | 6           | 6           |
| Liver Failure                      | Diagnosed   | 6           | 8           | 9           | 11          | 12          | 14          | 16          | 18          | 20          | 22          |
| <b>Total</b>                       |             | 20,592      | 20,364      | 20,139      | 19,923      | 19,721      | 19,533      | 19,357      | 19,196      | 19,047      | 18,913      |
| <b>Life Years Gained</b>           |             | 5           | 6           | 6           | 7           | 6           | 5           | 6           | 6           | 6           | 6           |
| <b>Quality Adjusted Life Years</b> |             |             |             |             |             |             |             |             |             |             |             |
| Not Chronic                        |             | 5,148       | 5,091       | 5,035       | 4,981       | 4,930       | 4,883       | 4,840       | 4,799       | 4,762       | 4,728       |
| Stage 0/1                          | Diagnosed   | 6,616       | 6,415       | 6,221       | 6,034       | 5,857       | 5,688       | 5,528       | 5,376       | 5,231       | 5,094       |
| Stage 0/1                          | Undiagnosed | 5,056       | 4,903       | 4,755       | 4,612       | 4,476       | 4,348       | 4,224       | 4,108       | 3,998       | 3,893       |
| Stage 2/3                          | Diagnosed   | 1,121       | 1,243       | 1,356       | 1,461       | 1,559       | 1,650       | 1,735       | 1,815       | 1,889       | 1,959       |
| Stage 2/3                          | Undiagnosed | 429         | 475         | 518         | 558         | 596         | 631         | 663         | 694         | 722         | 748         |
| Cirrhosis                          | Diagnosed   | 97          | 118         | 142         | 168         | 197         | 226         | 258         | 291         | 325         | 362         |
| Cirrhosis                          | Undiagnosed | 29          | 36          | 43          | 50          | 59          | 68          | 77          | 87          | 97          | 108         |
| HCC                                | Diagnosed   | 0           | 0           | 0           | 0           | 0           | 0           | 1           | 1           | 1           | 1           |
| Liver Failure                      | Diagnosed   | 2           | 3           | 3           | 4           | 4           | 4           | 5           | 6           | 6           | 7           |
| <b>Total</b>                       |             | 18,498      | 18,284      | 18,072      | 17,869      | 17,678      | 17,499      | 17,330      | 17,176      | 17,031      | 16,900      |
| <b>HCV QALYs Gained</b>            |             | 2,099       | 2,086       | 2,073       | 2,061       | 2,049       | 2,039       | 2,033       | 2,026       | 2,022       | 2,018       |
| <b>All Life Years Gained</b>       |             | 1,008       | 1,253       | 1,558       | 1,924       | 2,357       | 2,854       | 3,406       | 4,002       | 4,633       | 5,289       |
| <b>All QALYs Gained</b>            |             | 7,196       | 7,740       | 8,313       | 8,876       | 9,411       | 9,918       | 10,409      | 10,893      | 11,373      | 11,852      |

| Year                               |             | 2011   | 2012   | 2013   | 2014   | 2015   | 2016   | 2017   | 2018   | 2019   | 2020   |
|------------------------------------|-------------|--------|--------|--------|--------|--------|--------|--------|--------|--------|--------|
| <b>HIV</b>                         |             |        |        |        |        |        |        |        |        |        |        |
| <b>Survivors without HIV</b>       |             | 23,455 | 23,234 | 23,037 | 22,874 | 22,755 | 22,693 | 22,625 | 22,553 | 22,470 | 22,380 |
| <b>Survivors with HIV</b>          |             |        |        |        |        |        |        |        |        |        |        |
| CD4 >500                           | Diagnosed   | 225    | 141    | 88     | 55     | 34     | 21     | 13     | 8      | 5      | 3      |
| CD4 >500                           | Undiagnosed | 56     | 35     | 22     | 14     | 9      | 5      | 3      | 2      | 1      | 1      |
| CD4 <500                           | Diagnosed   | 12,958 | 12,296 | 11,638 | 10,996 | 10,375 | 9,781  | 9,214  | 8,677  | 8,165  | 7,679  |
| CD4 <500                           | Undiagnosed | 1,440  | 1,366  | 1,293  | 1,222  | 1,153  | 1,087  | 1,024  | 964    | 907    | 853    |
| AIDS                               | Diagnosed   | 2,824  | 2,762  | 2,674  | 2,569  | 2,453  | 2,331  | 2,208  | 2,086  | 1,968  | 1,855  |
| <b>Total</b>                       |             | 17,503 | 16,600 | 15,715 | 14,856 | 14,024 | 13,225 | 12,462 | 11,737 | 11,046 | 10,391 |
| <b>Life Years Gained</b>           |             | 5,952  | 6,634  | 7,322  | 8,018  | 8,731  | 9,468  | 10,163 | 10,816 | 11,424 | 11,989 |
| <b>Quality Adjusted Life Years</b> |             |        |        |        |        |        |        |        |        |        |        |
| CD4 >500                           | Diagnosed   | 196    | 123    | 77     | 48     | 30     | 18     | 11     | 7      | 4      | 3      |
| CD4 >500                           | Undiagnosed | 53     | 33     | 21     | 13     | 8      | 5      | 3      | 2      | 1      | 1      |
| CD4 <500                           | Diagnosed   | 9,848  | 9,345  | 8,845  | 8,357  | 7,885  | 7,434  | 7,003  | 6,595  | 6,205  | 5,836  |
| CD4 <500                           | Undiagnosed | 1,296  | 1,229  | 1,164  | 1,100  | 1,038  | 978    | 922    | 868    | 816    | 768    |
| AIDS                               | Diagnosed   | 1,751  | 1,712  | 1,658  | 1,593  | 1,521  | 1,445  | 1,369  | 1,293  | 1,220  | 1,150  |
| <b>Total</b>                       |             | 13,143 | 12,442 | 11,764 | 11,111 | 10,482 | 9,880  | 9,307  | 8,764  | 8,247  | 7,757  |
| <b>HIV QALYs Gained</b>            |             | 10,312 | 10,792 | 11,273 | 11,763 | 12,274 | 12,813 | 13,318 | 13,789 | 14,223 | 14,623 |

| Year                               |             | 2011   | 2012   | 2013   | 2014   | 2015   | 2016   | 2017   | 2018   | 2019   | 2020   |
|------------------------------------|-------------|--------|--------|--------|--------|--------|--------|--------|--------|--------|--------|
| <b>HCV</b>                         |             |        |        |        |        |        |        |        |        |        |        |
| <b>Survivors without HCV</b>       |             | 18,799 | 18,693 | 18,603 | 18,528 | 18,469 | 18,428 | 18,384 | 18,334 | 18,281 | 18,222 |
| <b>Survivors with HCV</b>          |             |        |        |        |        |        |        |        |        |        |        |
| Not Chronic                        |             | 4,699  | 4,672  | 4,650  | 4,631  | 4,617  | 4,606  | 4,595  | 4,582  | 4,569  | 4,555  |
| Stage 0/1                          | Diagnosed   | 6,054  | 5,905  | 5,765  | 5,634  | 5,511  | 5,397  | 5,284  | 5,173  | 5,063  | 4,955  |
| Stage 0/1                          | Undiagnosed | 4,036  | 3,937  | 3,843  | 3,756  | 3,674  | 3,598  | 3,523  | 3,449  | 3,375  | 3,303  |
| Stage 2/3                          | Diagnosed   | 2,469  | 2,544  | 2,616  | 2,683  | 2,748  | 2,810  | 2,867  | 2,919  | 2,966  | 3,008  |
| Stage 2/3                          | Undiagnosed | 823    | 848    | 872    | 894    | 916    | 937    | 956    | 973    | 989    | 1,003  |
| Cirrhosis                          | Diagnosed   | 570    | 625    | 682    | 740    | 800    | 862    | 924    | 987    | 1,051  | 1,115  |
| Cirrhosis                          | Undiagnosed | 143    | 156    | 170    | 185    | 200    | 215    | 231    | 247    | 263    | 279    |
| HCC                                | Diagnosed   | 7      | 8      | 8      | 9      | 10     | 11     | 11     | 12     | 13     | 14     |
| Liver Failure                      | Diagnosed   | 24     | 27     | 29     | 31     | 34     | 36     | 39     | 42     | 44     | 47     |
| <b>Total</b>                       |             | 18,794 | 18,687 | 18,598 | 18,523 | 18,466 | 18,425 | 18,380 | 18,330 | 18,276 | 18,218 |
| <b>Life Years Gained</b>           |             | 5      | 6      | 5      | 5      | 3      | 3      | 4      | 4      | 5      | 4      |
| <b>Quality Adjusted Life Years</b> |             |        |        |        |        |        |        |        |        |        |        |
| Not Chronic                        |             | 4,699  | 4,672  | 4,650  | 4,631  | 4,617  | 4,606  | 4,595  | 4,582  | 4,569  | 4,555  |
| Stage 0/1                          | Diagnosed   | 4,964  | 4,842  | 4,727  | 4,620  | 4,519  | 4,426  | 4,333  | 4,242  | 4,152  | 4,063  |
| Stage 0/1                          | Undiagnosed | 3,794  | 3,701  | 3,612  | 3,531  | 3,454  | 3,382  | 3,312  | 3,242  | 3,173  | 3,105  |
| Stage 2/3                          | Diagnosed   | 2,025  | 2,086  | 2,145  | 2,200  | 2,253  | 2,304  | 2,351  | 2,394  | 2,432  | 2,467  |
| Stage 2/3                          | Undiagnosed | 774    | 797    | 820    | 840    | 861    | 881    | 899    | 915    | 930    | 943    |
| Cirrhosis                          | Diagnosed   | 399    | 437    | 477    | 518    | 559    | 603    | 647    | 690    | 736    | 780    |
| Cirrhosis                          | Undiagnosed | 120    | 131    | 143    | 155    | 168    | 181    | 194    | 207    | 221    | 234    |
| HCC                                | Diagnosed   | 1      | 1      | 1      | 1      | 1      | 1      | 1      | 1      | 1      | 1      |
| Liver Failure                      | Diagnosed   | 8      | 9      | 9      | 10     | 11     | 12     | 12     | 13     | 14     | 15     |
| <b>Total</b>                       |             | 16,783 | 16,675 | 16,585 | 16,506 | 16,443 | 16,395 | 16,343 | 16,287 | 16,227 | 16,163 |
| <b>HCV QALYs Gained</b>            |             | 2,016  | 2,018  | 2,018  | 2,022  | 2,026  | 2,034  | 2,040  | 2,048  | 2,054  | 2,059  |
| <b>All Life Years Gained</b>       |             | 5,957  | 6,640  | 7,327  | 8,023  | 8,734  | 9,472  | 10,167 | 10,820 | 11,429 | 11,994 |
| <b>All QALYs Gained</b>            |             | 12,328 | 12,809 | 13,292 | 13,785 | 14,300 | 14,847 | 15,358 | 15,837 | 16,277 | 16,682 |



| Year                               |             | 2021   | 2022   | 2023   | 2024   | 2025   | 2026   | 2027   | 2028   | 2029   | 2030   |
|------------------------------------|-------------|--------|--------|--------|--------|--------|--------|--------|--------|--------|--------|
| <b>HIV</b>                         |             |        |        |        |        |        |        |        |        |        |        |
| <b>Survivors without HIV</b>       |             | 22,279 | 22,170 | 22,050 | 21,917 | 21,772 | 21,610 | 21,432 | 21,234 | 21,015 | 20,773 |
| <b>Survivors with HIV</b>          |             |        |        |        |        |        |        |        |        |        |        |
| CD4 >500                           | Diagnosed   | 2      | 1      | 1      | 0      | 0      | 0      | 0      | 0      | 0      | 0      |
| CD4 >500                           | Undiagnosed | 0      | 0      | 0      | 0      | 0      | 0      | 0      | 0      | 0      | 0      |
| CD4 <500                           | Diagnosed   | 7,219  | 6,784  | 6,371  | 5,980  | 5,610  | 5,258  | 4,925  | 4,608  | 4,307  | 4,021  |
| CD4 <500                           | Undiagnosed | 802    | 754    | 708    | 664    | 623    | 584    | 547    | 512    | 479    | 447    |
| AIDS                               | Diagnosed   | 1,747  | 1,644  | 1,546  | 1,453  | 1,365  | 1,281  | 1,202  | 1,127  | 1,056  | 988    |
| <b>Total</b>                       |             | 9,770  | 9,183  | 8,626  | 8,097  | 7,598  | 7,123  | 6,674  | 6,247  | 5,842  | 5,456  |
| <b>Life Years Gained</b>           |             | 12,509 | 12,987 | 13,424 | 13,820 | 14,174 | 14,487 | 14,758 | 14,987 | 15,173 | 15,317 |
| <b>Quality Adjusted Life Years</b> |             |        |        |        |        |        |        |        |        |        |        |
| CD4 >500                           | Diagnosed   | 2      | 1      | 1      | 0      | 0      | 0      | 0      | 0      | 0      | 0      |
| CD4 >500                           | Undiagnosed | 0      | 0      | 0      | 0      | 0      | 0      | 0      | 0      | 0      | 0      |
| CD4 <500                           | Diagnosed   | 5,486  | 5,156  | 4,842  | 4,545  | 4,264  | 3,996  | 3,743  | 3,502  | 3,273  | 3,056  |
| CD4 <500                           | Undiagnosed | 722    | 679    | 637    | 598    | 561    | 526    | 492    | 461    | 431    | 402    |
| AIDS                               | Diagnosed   | 1,083  | 1,019  | 959    | 901    | 846    | 794    | 745    | 699    | 655    | 613    |
| <b>Total</b>                       |             | 7,293  | 6,855  | 6,439  | 6,043  | 5,671  | 5,316  | 4,981  | 4,662  | 4,359  | 4,071  |
| <b>HIV QALYs Gained</b>            |             | 14,986 | 15,316 | 15,612 | 15,874 | 16,101 | 16,294 | 16,451 | 16,572 | 16,656 | 16,703 |

| Year                               |             | 2021   | 2022   | 2023   | 2024   | 2025   | 2026   | 2027   | 2028   | 2029   | 2030   |
|------------------------------------|-------------|--------|--------|--------|--------|--------|--------|--------|--------|--------|--------|
| <b>HCV</b>                         |             |        |        |        |        |        |        |        |        |        |        |
| <b>Survivors without HCV</b>       |             | 18,158 | 18,087 | 18,009 | 17,923 | 17,828 | 17,723 | 17,608 | 17,481 | 17,342 | 17,189 |
| <b>Survivors with HCV</b>          |             |        |        |        |        |        |        |        |        |        |        |
| Not Chronic                        |             | 4,538  | 4,520  | 4,501  | 4,479  | 4,455  | 4,428  | 4,399  | 4,367  | 4,332  | 4,293  |
| Stage 0/1                          | Diagnosed   | 4,847  | 4,741  | 4,635  | 4,530  | 4,425  | 4,321  | 4,216  | 4,112  | 4,007  | 3,902  |
| Stage 0/1                          | Undiagnosed | 3,232  | 3,161  | 3,090  | 3,020  | 2,950  | 2,881  | 2,811  | 2,741  | 2,671  | 2,601  |
| Stage 2/3                          | Diagnosed   | 3,046  | 3,079  | 3,107  | 3,131  | 3,149  | 3,163  | 3,172  | 3,176  | 3,175  | 3,168  |
| Stage 2/3                          | Undiagnosed | 1,015  | 1,026  | 1,036  | 1,044  | 1,050  | 1,054  | 1,057  | 1,059  | 1,058  | 1,056  |
| Cirrhosis                          | Diagnosed   | 1,179  | 1,243  | 1,306  | 1,369  | 1,432  | 1,493  | 1,552  | 1,611  | 1,667  | 1,721  |
| Cirrhosis                          | Undiagnosed | 295    | 311    | 327    | 342    | 358    | 373    | 388    | 403    | 417    | 430    |
| HCC                                | Diagnosed   | 14     | 15     | 16     | 17     | 18     | 18     | 19     | 20     | 20     | 21     |
| Liver Failure                      | Diagnosed   | 49     | 52     | 55     | 57     | 60     | 62     | 65     | 67     | 69     | 71     |
| <b>Total</b>                       |             | 18,152 | 18,081 | 18,002 | 17,915 | 17,819 | 17,713 | 17,595 | 17,469 | 17,327 | 17,171 |
| <b>Life Years Gained</b>           |             | 6      | 6      | 7      | 8      | 9      | 10     | 13     | 12     | 15     | 18     |
| <b>Quality Adjusted Life Years</b> |             |        |        |        |        |        |        |        |        |        |        |
| Not Chronic                        |             | 4,538  | 4,520  | 4,501  | 4,479  | 4,455  | 4,428  | 4,399  | 4,367  | 4,332  | 4,293  |
| Stage 0/1                          | Diagnosed   | 3,975  | 3,888  | 3,801  | 3,715  | 3,629  | 3,543  | 3,457  | 3,372  | 3,286  | 3,200  |
| Stage 0/1                          | Undiagnosed | 3,038  | 2,971  | 2,905  | 2,839  | 2,773  | 2,708  | 2,642  | 2,577  | 2,511  | 2,445  |
| Stage 2/3                          | Diagnosed   | 2,498  | 2,525  | 2,548  | 2,567  | 2,582  | 2,594  | 2,601  | 2,604  | 2,604  | 2,598  |
| Stage 2/3                          | Undiagnosed | 954    | 964    | 974    | 981    | 987    | 991    | 994    | 995    | 995    | 993    |
| Cirrhosis                          | Diagnosed   | 826    | 870    | 914    | 958    | 1,002  | 1,046  | 1,086  | 1,128  | 1,168  | 1,205  |
| Cirrhosis                          | Undiagnosed | 248    | 261    | 275    | 287    | 301    | 313    | 326    | 339    | 350    | 361    |
| HCC                                | Diagnosed   | 1      | 2      | 2      | 2      | 2      | 2      | 2      | 2      | 2      | 2      |
| Liver Failure                      | Diagnosed   | 16     | 17     | 18     | 18     | 19     | 20     | 21     | 21     | 22     | 23     |
| <b>Total</b>                       |             | 16,093 | 16,018 | 15,936 | 15,847 | 15,749 | 15,644 | 15,528 | 15,405 | 15,269 | 15,119 |
| <b>HCV QALYs Gained</b>            |             | 2,065  | 2,069  | 2,074  | 2,076  | 2,079  | 2,079  | 2,080  | 2,076  | 2,073  | 2,070  |
| <b>All Life Years Gained</b>       |             | 12,515 | 12,994 | 13,432 | 13,828 | 14,183 | 14,497 | 14,771 | 14,999 | 15,187 | 15,336 |
| <b>All QALYs Gained</b>            |             | 17,051 | 17,385 | 17,686 | 17,950 | 18,180 | 18,373 | 18,531 | 18,648 | 18,729 | 18,772 |

| Year                               |             | 2031   | 2032   | 2033   | 2034   | 2035   | 2036   | 2037   | 2038   | 2039   | 2040   |
|------------------------------------|-------------|--------|--------|--------|--------|--------|--------|--------|--------|--------|--------|
| <b>HIV</b>                         |             |        |        |        |        |        |        |        |        |        |        |
| <b>Survivors without HIV</b>       |             | 20,510 | 20,223 | 19,911 | 19,571 | 19,204 | 18,805 | 18,371 | 17,904 | 17,409 | 16,874 |
| <b>Survivors with HIV</b>          |             |        |        |        |        |        |        |        |        |        |        |
| CD4 >500                           | Diagnosed   | 0      | 0      | 0      | 0      | 0      | 0      | 0      | 0      | 0      | 0      |
| CD4 >500                           | Undiagnosed | 0      | 0      | 0      | 0      | 0      | 0      | 0      | 0      | 0      | 0      |
| CD4 <500                           | Diagnosed   | 3,750  | 3,492  | 3,248  | 3,016  | 2,796  | 2,587  | 2,388  | 2,199  | 2,021  | 1,851  |
| CD4 <500                           | Undiagnosed | 417    | 388    | 361    | 335    | 311    | 287    | 265    | 244    | 225    | 206    |
| AIDS                               | Diagnosed   | 924    | 864    | 806    | 751    | 699    | 650    | 603    | 558    | 516    | 476    |
| <b>Total</b>                       |             | 5,091  | 4,744  | 4,415  | 4,102  | 3,806  | 3,524  | 3,256  | 3,001  | 2,762  | 2,533  |
| <b>Life Years Gained</b>           |             | 15,419 | 15,479 | 15,496 | 15,469 | 15,398 | 15,281 | 15,115 | 14,903 | 14,647 | 14,341 |
| <b>Quality Adjusted Life Years</b> |             |        |        |        |        |        |        |        |        |        |        |
| CD4 >500                           | Diagnosed   | 0      | 0      | 0      | 0      | 0      | 0      | 0      | 0      | 0      | 0      |
| CD4 >500                           | Undiagnosed | 0      | 0      | 0      | 0      | 0      | 0      | 0      | 0      | 0      | 0      |
| CD4 <500                           | Diagnosed   | 2,850  | 2,654  | 2,468  | 2,292  | 2,125  | 1,966  | 1,815  | 1,671  | 1,536  | 1,407  |
| CD4 <500                           | Undiagnosed | 375    | 349    | 325    | 302    | 280    | 258    | 239    | 220    | 203    | 185    |
| AIDS                               | Diagnosed   | 573    | 536    | 500    | 466    | 433    | 403    | 374    | 346    | 320    | 295    |
| <b>Total</b>                       |             | 3,798  | 3,539  | 3,293  | 3,059  | 2,838  | 2,627  | 2,427  | 2,237  | 2,058  | 1,887  |
| <b>HIV QALYs Gained</b>            |             | 16,712 | 16,685 | 16,618 | 16,512 | 16,366 | 16,177 | 15,943 | 15,667 | 15,350 | 14,986 |

| Year                               |             | 2031   | 2032   | 2033   | 2034   | 2035   | 2036   | 2037   | 2038   | 2039   | 2040   |
|------------------------------------|-------------|--------|--------|--------|--------|--------|--------|--------|--------|--------|--------|
| <b>HCV</b>                         |             |        |        |        |        |        |        |        |        |        |        |
| <b>Survivors without HCV</b>       |             | 17,021 | 16,836 | 16,634 | 16,413 | 16,171 | 15,909 | 15,624 | 15,315 | 14,981 | 14,622 |
| <b>Survivors with HCV</b>          |             |        |        |        |        |        |        |        |        |        |        |
| Not Chronic                        |             | 4,251  | 4,204  | 4,153  | 4,096  | 4,036  | 3,970  | 3,898  | 3,821  | 3,736  | 3,646  |
| Stage 0/1                          | Diagnosed   | 3,796  | 3,690  | 3,582  | 3,474  | 3,364  | 3,253  | 3,140  | 3,026  | 2,911  | 2,793  |
| Stage 0/1                          | Undiagnosed | 2,531  | 2,460  | 2,388  | 2,316  | 2,242  | 2,168  | 2,093  | 2,017  | 1,940  | 1,862  |
| Stage 2/3                          | Diagnosed   | 3,157  | 3,140  | 3,117  | 3,089  | 3,055  | 3,015  | 2,969  | 2,917  | 2,859  | 2,794  |
| Stage 2/3                          | Undiagnosed | 1,052  | 1,047  | 1,039  | 1,030  | 1,018  | 1,005  | 990    | 972    | 953    | 931    |
| Cirrhosis                          | Diagnosed   | 1,772  | 1,820  | 1,865  | 1,906  | 1,943  | 1,975  | 2,002  | 2,023  | 2,038  | 2,047  |
| Cirrhosis                          | Undiagnosed | 443    | 455    | 466    | 477    | 486    | 494    | 500    | 506    | 510    | 512    |
| HCC                                | Diagnosed   | 22     | 22     | 23     | 23     | 24     | 24     | 25     | 25     | 25     | 25     |
| Liver Failure                      | Diagnosed   | 74     | 75     | 77     | 79     | 80     | 81     | 82     | 83     | 84     | 84     |
| <b>Total</b>                       |             | 17,002 | 16,816 | 16,610 | 16,388 | 16,144 | 15,880 | 15,592 | 15,282 | 14,947 | 14,585 |
| <b>Life Years Gained</b>           |             | 19     | 20     | 24     | 25     | 27     | 29     | 32     | 33     | 34     | 37     |
| <b>Quality Adjusted Life Years</b> |             |        |        |        |        |        |        |        |        |        |        |
| Not Chronic                        |             | 4,251  | 4,204  | 4,153  | 4,096  | 4,036  | 3,970  | 3,898  | 3,821  | 3,736  | 3,646  |
| Stage 0/1                          | Diagnosed   | 3,113  | 3,026  | 2,937  | 2,849  | 2,758  | 2,667  | 2,575  | 2,481  | 2,387  | 2,290  |
| Stage 0/1                          | Undiagnosed | 2,379  | 2,312  | 2,245  | 2,177  | 2,107  | 2,038  | 1,967  | 1,896  | 1,824  | 1,750  |
| Stage 2/3                          | Diagnosed   | 2,589  | 2,575  | 2,556  | 2,533  | 2,505  | 2,472  | 2,435  | 2,392  | 2,344  | 2,291  |
| Stage 2/3                          | Undiagnosed | 989    | 984    | 977    | 968    | 957    | 945    | 931    | 914    | 896    | 875    |
| Cirrhosis                          | Diagnosed   | 1,240  | 1,275  | 1,306  | 1,335  | 1,361  | 1,384  | 1,402  | 1,417  | 1,427  | 1,434  |
| Cirrhosis                          | Undiagnosed | 372    | 382    | 391    | 401    | 408    | 415    | 420    | 425    | 428    | 430    |
| HCC                                | Diagnosed   | 2      | 2      | 2      | 2      | 2      | 2      | 3      | 3      | 3      | 3      |
| Liver Failure                      | Diagnosed   | 24     | 24     | 25     | 25     | 26     | 26     | 26     | 27     | 27     | 27     |
| <b>Total</b>                       |             | 14,959 | 14,785 | 14,592 | 14,386 | 14,161 | 13,919 | 13,656 | 13,375 | 13,072 | 12,746 |
| <b>HCV QALYs Gained</b>            |             | 2,062  | 2,052  | 2,042  | 2,027  | 2,010  | 1,989  | 1,967  | 1,940  | 1,909  | 1,875  |
| <b>All Life Years Gained</b>       |             | 15,438 | 15,500 | 15,520 | 15,494 | 15,425 | 15,309 | 15,146 | 14,936 | 14,681 | 14,378 |
| <b>All QALYs Gained</b>            |             | 18,774 | 18,736 | 18,660 | 18,539 | 18,376 | 18,166 | 17,911 | 17,608 | 17,260 | 16,862 |

| Year                               |             | 2041   | 2042   | 2043   | 2044   | 2045   | 2046   | 2047   | 2048   | 2049   | 2050  |
|------------------------------------|-------------|--------|--------|--------|--------|--------|--------|--------|--------|--------|-------|
| <b>HIV</b>                         |             |        |        |        |        |        |        |        |        |        |       |
| <b>Survivors without HIV</b>       |             | 16,302 | 15,697 | 15,053 | 14,376 | 13,662 | 12,916 | 12,144 | 11,347 | 10,526 | 9,689 |
| <b>Survivors with HIV</b>          |             |        |        |        |        |        |        |        |        |        |       |
| CD4 >500                           | Diagnosed   | 0      | 0      | 0      | 0      | 0      | 0      | 0      | 0      | 0      | 0     |
| CD4 >500                           | Undiagnosed | 0      | 0      | 0      | 0      | 0      | 0      | 0      | 0      | 0      | 0     |
| CD4 <500                           | Diagnosed   | 1,690  | 1,539  | 1,395  | 1,260  | 1,132  | 1,013  | 901    | 796    | 699    | 609   |
| CD4 <500                           | Undiagnosed | 188    | 171    | 155    | 140    | 126    | 113    | 100    | 88     | 78     | 68    |
| AIDS                               | Diagnosed   | 438    | 402    | 368    | 336    | 305    | 276    | 249    | 224    | 200    | 178   |
| <b>Total</b>                       |             | 2,316  | 2,112  | 1,918  | 1,736  | 1,563  | 1,402  | 1,250  | 1,108  | 977    | 855   |
| <b>Life Years Gained</b>           |             | 13,986 | 13,585 | 13,135 | 12,640 | 12,099 | 11,514 | 10,894 | 10,239 | 9,549  | 8,834 |
| <b>Quality Adjusted Life Years</b> |             |        |        |        |        |        |        |        |        |        |       |
| CD4 >500                           | Diagnosed   | 0      | 0      | 0      | 0      | 0      | 0      | 0      | 0      | 0      | 0     |
| CD4 >500                           | Undiagnosed | 0      | 0      | 0      | 0      | 0      | 0      | 0      | 0      | 0      | 0     |
| CD4 <500                           | Diagnosed   | 1,284  | 1,170  | 1,060  | 958    | 860    | 770    | 685    | 605    | 531    | 463   |
| CD4 <500                           | Undiagnosed | 169    | 154    | 140    | 126    | 113    | 102    | 90     | 79     | 70     | 61    |
| AIDS                               | Diagnosed   | 272    | 249    | 228    | 208    | 189    | 171    | 154    | 139    | 124    | 110   |
| <b>Total</b>                       |             | 1,725  | 1,573  | 1,428  | 1,292  | 1,163  | 1,043  | 929    | 823    | 725    | 634   |
| <b>HIV QALYs Gained</b>            |             | 14,577 | 14,124 | 13,626 | 13,084 | 12,499 | 11,873 | 11,215 | 10,524 | 9,801  | 9,054 |

| Year                               |             | 2041   | 2042   | 2043   | 2044   | 2045   | 2046   | 2047   | 2048   | 2049   | 2050   |
|------------------------------------|-------------|--------|--------|--------|--------|--------|--------|--------|--------|--------|--------|
| <b>HCV</b>                         |             |        |        |        |        |        |        |        |        |        |        |
| <b>Survivors without HCV</b>       |             | 14,235 | 13,820 | 13,377 | 12,906 | 12,405 | 11,876 | 11,321 | 10,740 | 10,135 | 9,511  |
| <b>Survivors with HCV</b>          |             |        |        |        |        |        |        |        |        |        |        |
| Not Chronic                        |             | 3,549  | 3,446  | 3,334  | 3,216  | 3,092  | 2,959  | 2,821  | 2,677  | 2,526  | 2,369  |
| Stage 0/1                          | Diagnosed   | 2,674  | 2,554  | 2,432  | 2,308  | 2,183  | 2,057  | 1,930  | 1,803  | 1,675  | 1,548  |
| Stage 0/1                          | Undiagnosed | 1,783  | 1,703  | 1,621  | 1,539  | 1,456  | 1,371  | 1,287  | 1,202  | 1,117  | 1,032  |
| Stage 2/3                          | Diagnosed   | 2,723  | 2,645  | 2,561  | 2,471  | 2,375  | 2,272  | 2,164  | 2,051  | 1,933  | 1,811  |
| Stage 2/3                          | Undiagnosed | 908    | 882    | 854    | 824    | 792    | 757    | 721    | 684    | 644    | 604    |
| Cirrhosis                          | Diagnosed   | 2,048  | 2,042  | 2,029  | 2,007  | 1,976  | 1,937  | 1,889  | 1,832  | 1,766  | 1,691  |
| Cirrhosis                          | Undiagnosed | 512    | 511    | 507    | 502    | 494    | 484    | 472    | 458    | 441    | 423    |
| HCC                                | Diagnosed   | 25     | 25     | 25     | 25     | 24     | 24     | 23     | 22     | 22     | 21     |
| Liver Failure                      | Diagnosed   | 84     | 83     | 83     | 82     | 80     | 78     | 76     | 74     | 71     | 68     |
| <b>Total</b>                       |             | 14,197 | 13,783 | 13,338 | 12,867 | 12,368 | 11,837 | 11,284 | 10,707 | 10,102 | 9,478  |
| <b>Life Years Gained</b>           |             | 38     | 37     | 39     | 39     | 37     | 39     | 37     | 33     | 33     | 33     |
| <b>Quality Adjusted Life Years</b> |             |        |        |        |        |        |        |        |        |        |        |
| Not Chronic                        |             | 3,549  | 3,446  | 3,334  | 3,216  | 3,092  | 2,959  | 2,821  | 2,677  | 2,526  | 2,369  |
| Stage 0/1                          | Diagnosed   | 2,193  | 2,094  | 1,994  | 1,893  | 1,790  | 1,687  | 1,583  | 1,478  | 1,374  | 1,269  |
| Stage 0/1                          | Undiagnosed | 1,676  | 1,601  | 1,524  | 1,447  | 1,369  | 1,289  | 1,210  | 1,130  | 1,050  | 970    |
| Stage 2/3                          | Diagnosed   | 2,233  | 2,169  | 2,100  | 2,026  | 1,948  | 1,863  | 1,774  | 1,682  | 1,585  | 1,485  |
| Stage 2/3                          | Undiagnosed | 854    | 829    | 803    | 775    | 744    | 712    | 678    | 643    | 605    | 568    |
| Cirrhosis                          | Diagnosed   | 1,435  | 1,431  | 1,422  | 1,406  | 1,385  | 1,358  | 1,325  | 1,285  | 1,238  | 1,185  |
| Cirrhosis                          | Undiagnosed | 430    | 429    | 426    | 422    | 415    | 407    | 396    | 385    | 370    | 355    |
| HCC                                | Diagnosed   | 3      | 3      | 3      | 3      | 2      | 2      | 2      | 2      | 2      | 2      |
| Liver Failure                      | Diagnosed   | 27     | 27     | 27     | 26     | 26     | 25     | 24     | 24     | 23     | 22     |
| <b>Total</b>                       |             | 12,398 | 12,029 | 11,631 | 11,212 | 10,771 | 10,301 | 9,813  | 9,305  | 8,773  | 8,226  |
| <b>HCV QALYs Gained</b>            |             | 1,837  | 1,791  | 1,745  | 1,693  | 1,634  | 1,575  | 1,508  | 1,434  | 1,362  | 1,285  |
| <b>All Life Years Gained</b>       |             | 14,024 | 13,622 | 13,174 | 12,679 | 12,136 | 11,553 | 10,931 | 10,271 | 9,583  | 8,866  |
| <b>All QALYs Gained</b>            |             | 16,414 | 15,915 | 15,371 | 14,777 | 14,133 | 13,449 | 12,723 | 11,958 | 11,163 | 10,339 |

| Year                               |             | 2051  | 2052  | 2053  | 2054  | 2055  | 2056  | 2057  | 2058  | 2059  | 2060  |
|------------------------------------|-------------|-------|-------|-------|-------|-------|-------|-------|-------|-------|-------|
| <b>HIV</b>                         |             |       |       |       |       |       |       |       |       |       |       |
| <b>Survivors without HIV</b>       |             | 8,845 | 8,001 | 7,164 | 6,344 | 5,553 | 4,800 | 4,090 | 3,433 | 2,838 | 2,305 |
| <b>Survivors with HIV</b>          |             |       |       |       |       |       |       |       |       |       |       |
| CD4 >500                           | Diagnosed   | 0     | 0     | 0     | 0     | 0     | 0     | 0     | 0     | 0     | 0     |
| CD4 >500                           | Undiagnosed | 0     | 0     | 0     | 0     | 0     | 0     | 0     | 0     | 0     | 0     |
| CD4 <500                           | Diagnosed   | 526   | 451   | 382   | 320   | 265   | 217   | 175   | 139   | 109   | 84    |
| CD4 <500                           | Undiagnosed | 58    | 50    | 42    | 36    | 29    | 24    | 19    | 15    | 12    | 9     |
| AIDS                               | Diagnosed   | 157   | 137   | 119   | 103   | 88    | 75    | 63    | 52    | 42    | 34    |
| <b>Total</b>                       |             | 741   | 638   | 543   | 459   | 382   | 316   | 257   | 206   | 163   | 127   |
| <b>Life Years Gained</b>           |             | 8,104 | 7,363 | 6,621 | 5,885 | 5,171 | 4,484 | 3,833 | 3,227 | 2,675 | 2,178 |
| <b>Quality Adjusted Life Years</b> |             |       |       |       |       |       |       |       |       |       |       |
| CD4 >500                           | Diagnosed   | 0     | 0     | 0     | 0     | 0     | 0     | 0     | 0     | 0     | 0     |
| CD4 >500                           | Undiagnosed | 0     | 0     | 0     | 0     | 0     | 0     | 0     | 0     | 0     | 0     |
| CD4 <500                           | Diagnosed   | 400   | 343   | 290   | 243   | 201   | 165   | 133   | 106   | 83    | 64    |
| CD4 <500                           | Undiagnosed | 52    | 45    | 38    | 32    | 26    | 22    | 17    | 14    | 11    | 8     |
| AIDS                               | Diagnosed   | 97    | 85    | 74    | 64    | 55    | 47    | 39    | 32    | 26    | 21    |
| <b>Total</b>                       |             | 549   | 473   | 402   | 339   | 282   | 233   | 189   | 151   | 120   | 93    |
| <b>HIV QALYs Gained</b>            |             | 8,295 | 7,528 | 6,762 | 6,005 | 5,271 | 4,567 | 3,901 | 3,282 | 2,718 | 2,212 |

| Year                               |             | 2051  | 2052  | 2053  | 2054  | 2055  | 2056  | 2057  | 2058  | 2059  | 2060  |
|------------------------------------|-------------|-------|-------|-------|-------|-------|-------|-------|-------|-------|-------|
| <b>HCV</b>                         |             | 8,869 | 8,216 | 7,556 | 6,893 | 6,235 | 5,588 | 4,960 | 4,358 | 3,787 | 3,253 |
| <b>Survivors without HCV</b>       |             |       |       |       |       |       |       |       |       |       |       |
| <b>Survivors with HCV</b>          |             | 2,209 | 2,047 | 1,883 | 1,717 | 1,552 | 1,392 | 1,235 | 1,085 | 943   | 810   |
| Not Chronic                        |             | 1,422 | 1,297 | 1,176 | 1,057 | 942   | 832   | 728   | 631   | 541   | 458   |
| Stage 0/1                          | Diagnosed   | 948   | 865   | 784   | 705   | 628   | 555   | 486   | 421   | 360   | 305   |
| Stage 0/1                          | Undiagnosed | 1,686 | 1,559 | 1,431 | 1,302 | 1,175 | 1,051 | 930   | 815   | 706   | 605   |
| Stage 2/3                          | Diagnosed   | 562   | 520   | 477   | 434   | 392   | 350   | 310   | 272   | 235   | 202   |
| Stage 2/3                          | Undiagnosed | 1,609 | 1,519 | 1,423 | 1,322 | 1,217 | 1,110 | 1,001 | 894   | 789   | 689   |
| Cirrhosis                          | Diagnosed   | 402   | 380   | 356   | 331   | 304   | 277   | 250   | 224   | 197   | 172   |
| Cirrhosis                          | Undiagnosed | 20    | 19    | 17    | 16    | 15    | 14    | 12    | 11    | 10    | 8     |
| HCC                                | Diagnosed   | 64    | 60    | 56    | 52    | 48    | 43    | 39    | 34    | 30    | 26    |
| Liver Failure                      | Diagnosed   | 8,838 | 8,187 | 7,530 | 6,868 | 6,210 | 5,567 | 4,940 | 4,342 | 3,771 | 3,241 |
| <b>Total</b>                       |             | 31    | 29    | 26    | 25    | 25    | 21    | 20    | 16    | 16    | 12    |
| <b>Life Years Gained</b>           |             |       |       |       |       |       |       |       |       |       |       |
| <b>Quality Adjusted Life Years</b> |             | 2,209 | 2,047 | 1,883 | 1,717 | 1,552 | 1,392 | 1,235 | 1,085 | 943   | 810   |
| Not Chronic                        |             | 1,166 | 1,064 | 964   | 867   | 772   | 682   | 597   | 517   | 444   | 376   |
| Stage 0/1                          | Diagnosed   | 891   | 813   | 737   | 663   | 590   | 522   | 457   | 396   | 338   | 287   |
| Stage 0/1                          | Undiagnosed | 1,383 | 1,278 | 1,173 | 1,068 | 964   | 862   | 763   | 668   | 579   | 496   |
| Stage 2/3                          | Diagnosed   | 528   | 489   | 448   | 408   | 368   | 329   | 291   | 256   | 221   | 190   |
| Stage 2/3                          | Undiagnosed | 1,129 | 1,066 | 999   | 928   | 854   | 779   | 703   | 628   | 554   | 485   |
| Cirrhosis                          | Diagnosed   | 338   | 319   | 299   | 278   | 255   | 233   | 210   | 188   | 165   | 144   |
| Cirrhosis                          | Undiagnosed | 2     | 2     | 2     | 2     | 2     | 1     | 1     | 1     | 1     | 1     |
| HCC                                | Diagnosed   | 20    | 19    | 18    | 17    | 15    | 14    | 12    | 11    | 10    | 8     |
| Liver Failure                      | Diagnosed   | 7,666 | 7,097 | 6,524 | 5,946 | 5,373 | 4,814 | 4,269 | 3,751 | 3,255 | 2,797 |
| <b>Total</b>                       |             | 1,203 | 1,119 | 1,032 | 946   | 862   | 774   | 691   | 608   | 532   | 457   |
| <b>HCV QALYs Gained</b>            |             |       |       |       |       |       |       |       |       |       |       |
| <b>All Life Years Gained</b>       |             | 8,134 | 7,392 | 6,647 | 5,910 | 5,196 | 4,505 | 3,853 | 3,243 | 2,691 | 2,190 |
| <b>All QALYs Gained</b>            |             | 9,498 | 8,648 | 7,794 | 6,952 | 6,133 | 5,341 | 4,592 | 3,889 | 3,250 | 2,669 |



| Year                               |             | 2061  | 2062  | 2063  | 2064 | 2065 | 2066 | 2067 | 2068 | 2069 | 2070 |
|------------------------------------|-------------|-------|-------|-------|------|------|------|------|------|------|------|
| <b>HIV</b>                         |             |       |       |       |      |      |      |      |      |      |      |
| <b>Survivors without HIV</b>       |             | 1,842 | 1,450 | 1,120 | 853  | 635  | 454  | 308  | 188  | 90   | 0    |
| <b>Survivors with HIV</b>          |             |       |       |       |      |      |      |      |      |      |      |
| CD4 >500                           | Diagnosed   | 0     | 0     | 0     | 0    | 0    | 0    | 0    | 0    | 0    | 0    |
| CD4 >500                           | Undiagnosed | 0     | 0     | 0     | 0    | 0    | 0    | 0    | 0    | 0    | 0    |
| CD4 <500                           | Diagnosed   | 63    | 47    | 35    | 25   | 18   | 12   | 8    | 5    | 2    | 0    |
| CD4 <500                           | Undiagnosed | 7     | 5     | 4     | 3    | 2    | 1    | 1    | 1    | 0    | 0    |
| AIDS                               | Diagnosed   | 27    | 21    | 16    | 12   | 8    | 6    | 4    | 2    | 1    | 0    |
| <b>Total</b>                       |             | 97    | 73    | 55    | 40   | 28   | 19   | 13   | 8    | 3    | 0    |
| <b>Life Years Gained</b>           |             | 1,745 | 1,377 | 1,065 | 813  | 607  | 435  | 295  | 180  | 87   | 0    |
| <b>Quality Adjusted Life Years</b> |             |       |       |       |      |      |      |      |      |      |      |
| CD4 >500                           | Diagnosed   | 0     | 0     | 0     | 0    | 0    | 0    | 0    | 0    | 0    | 0    |
| CD4 >500                           | Undiagnosed | 0     | 0     | 0     | 0    | 0    | 0    | 0    | 0    | 0    | 0    |
| CD4 <500                           | Diagnosed   | 48    | 36    | 27    | 19   | 14   | 9    | 6    | 4    | 2    | 0    |
| CD4 <500                           | Undiagnosed | 6     | 5     | 4     | 3    | 2    | 1    | 1    | 1    | 0    | 0    |
| AIDS                               | Diagnosed   | 17    | 13    | 10    | 7    | 5    | 4    | 2    | 1    | 1    | 0    |
| <b>Total</b>                       |             | 71    | 53    | 40    | 29   | 20   | 14   | 9    | 6    | 2    | 0    |
| <b>HIV QALYs Gained</b>            |             | 1,771 | 1,397 | 1,080 | 824  | 615  | 440  | 298  | 182  | 87   | 0    |

| Year                               |             | 2061  | 2062  | 2063  | 2064  | 2065  | 2066 | 2067 | 2068 | 2069 | 2070 |
|------------------------------------|-------------|-------|-------|-------|-------|-------|------|------|------|------|------|
| <b>HCV</b>                         |             |       |       |       |       |       |      |      |      |      |      |
| <b>Survivors without HCV</b>       |             | 2,760 | 2,311 | 1,899 | 1,534 | 1,219 | 952  | 731  | 550  | 405  | 290  |
| <b>Survivors with HCV</b>          |             |       |       |       |       |       |      |      |      |      |      |
| Not Chronic                        |             | 687   | 576   | 473   | 382   | 304   | 237  | 182  | 137  | 101  | 72   |
| Stage 0/1                          | Diagnosed   | 383   | 316   | 256   | 204   | 160   | 124  | 94   | 70   | 51   | 36   |
| Stage 0/1                          | Undiagnosed | 255   | 211   | 171   | 136   | 107   | 82   | 62   | 46   | 34   | 24   |
| Stage 2/3                          | Diagnosed   | 511   | 427   | 349   | 281   | 223   | 173  | 133  | 99   | 73   | 52   |
| Stage 2/3                          | Undiagnosed | 170   | 142   | 116   | 94    | 74    | 58   | 44   | 33   | 24   | 17   |
| Cirrhosis                          | Diagnosed   | 593   | 504   | 420   | 344   | 277   | 219  | 170  | 130  | 97   | 70   |
| Cirrhosis                          | Undiagnosed | 148   | 126   | 105   | 86    | 69    | 55   | 43   | 32   | 24   | 17   |
| HCC                                | Diagnosed   | 7     | 6     | 5     | 4     | 3     | 3    | 2    | 2    | 1    | 1    |
| Liver Failure                      | Diagnosed   | 22    | 19    | 15    | 12    | 10    | 8    | 6    | 4    | 3    | 2    |
| <b>Total</b>                       |             | 2,747 | 2,302 | 1,890 | 1,527 | 1,214 | 948  | 728  | 547  | 404  | 288  |
| <b>Life Years Gained</b>           |             | 13    | 9     | 9     | 7     | 5     | 4    | 3    | 3    | 1    | 2    |
| <b>Quality Adjusted Life Years</b> |             |       |       |       |       |       |      |      |      |      |      |
| Not Chronic                        |             | 687   | 576   | 473   | 382   | 304   | 237  | 182  | 137  | 101  | 72   |
| Stage 0/1                          | Diagnosed   | 314   | 259   | 210   | 167   | 131   | 102  | 77   | 57   | 42   | 30   |
| Stage 0/1                          | Undiagnosed | 240   | 198   | 161   | 128   | 101   | 77   | 58   | 43   | 32   | 23   |
| Stage 2/3                          | Diagnosed   | 419   | 350   | 286   | 230   | 183   | 142  | 109  | 81   | 60   | 43   |
| Stage 2/3                          | Undiagnosed | 160   | 133   | 109   | 88    | 70    | 55   | 41   | 31   | 23   | 16   |
| Cirrhosis                          | Diagnosed   | 417   | 354   | 296   | 243   | 195   | 154  | 120  | 92   | 69   | 50   |
| Cirrhosis                          | Undiagnosed | 124   | 106   | 88    | 72    | 58    | 46   | 36   | 27   | 20   | 14   |
| HCC                                | Diagnosed   | 1     | 1     | 1     | 0     | 0     | 0    | 0    | 0    | 0    | 0    |
| Liver Failure                      | Diagnosed   | 7     | 6     | 5     | 4     | 3     | 3    | 2    | 1    | 1    | 1    |
| <b>Total</b>                       |             | 2,369 | 1,984 | 1,628 | 1,315 | 1,045 | 815  | 626  | 470  | 347  | 247  |
| <b>HCV QALYs Gained</b>            |             | 391   | 327   | 271   | 219   | 174   | 137  | 105  | 80   | 58   | 42   |
| <b>All Life Years Gained</b>       |             | 1,758 | 1,386 | 1,074 | 820   | 612   | 439  | 298  | 183  | 88   | 2    |
| <b>All QALYs Gained</b>            |             | 2,162 | 1,724 | 1,351 | 1,043 | 789   | 577  | 404  | 263  | 145  | 42   |

| Year                               | 2071 | 2072 | 2073 | 2074 | 2075 | Total       |         |
|------------------------------------|------|------|------|------|------|-------------|---------|
| <b>HIV</b>                         |      |      |      |      |      |             |         |
| <b>Survivors without HIV</b>       |      |      |      |      |      | 1,162,533   |         |
| <b>Survivors with HIV</b>          |      |      |      |      |      |             |         |
| CD4 >500                           |      |      |      |      |      | Diagnosed   | 96,422  |
| CD4 >500                           |      |      |      |      |      | Undiagnosed | 24,103  |
| CD4 <500                           |      |      |      |      |      | Diagnosed   | 344,734 |
| CD4 <500                           |      |      |      |      |      | Undiagnosed | 38,302  |
| AIDS                               |      |      |      |      |      | Diagnosed   | 71,410  |
| <b>Total</b>                       |      |      |      |      |      |             | 574,971 |
| <b>Life Years Gained</b>           |      |      |      |      |      |             | 587,562 |
| <b>Quality Adjusted Life Years</b> |      |      |      |      |      |             |         |
| CD4 >500                           |      |      |      |      |      | Diagnosed   | 83,887  |
| CD4 >500                           |      |      |      |      |      | Undiagnosed | 22,657  |
| CD4 <500                           |      |      |      |      |      | Diagnosed   | 261,998 |
| CD4 <500                           |      |      |      |      |      | Undiagnosed | 34,472  |
| AIDS                               |      |      |      |      |      | Diagnosed   | 44,274  |
| <b>Total</b>                       | 0    | 0    | 0    | 0    | 0    |             | 447,288 |
| <b>HIV QALYs Gained</b>            |      | 0    | 0    | 0    | 0    |             | 715,245 |

| Year                               |             | 2071 | 2072 | 2073 | 2074 | 2075 | Total     |
|------------------------------------|-------------|------|------|------|------|------|-----------|
| <b>HCV</b>                         |             |      |      |      |      |      |           |
| <b>Survivors without HCV</b>       |             | 198  | 127  | 73   | 32   | 0    | 1,036,257 |
| <b>Survivors with HCV</b>          |             |      |      |      |      |      |           |
| Not Chronic                        |             | 49   | 31   | 19   | 8    | 0    | 258,775   |
| Stage 0/1                          | Diagnosed   | 24   | 15   | 9    | 4    | 0    | 285,367   |
| Stage 0/1                          | Undiagnosed | 16   | 10   | 6    | 3    | 0    | 190,245   |
| Stage 2/3                          | Diagnosed   | 35   | 23   | 13   | 6    | 0    | 150,916   |
| Stage 2/3                          | Undiagnosed | 12   | 8    | 4    | 2    | 0    | 50,307    |
| Cirrhosis                          | Diagnosed   | 48   | 31   | 18   | 8    | 0    | 79,585    |
| Cirrhosis                          | Undiagnosed | 12   | 8    | 5    | 2    | 0    | 19,898    |
| HCC                                | Diagnosed   | 1    | 0    | 0    | 0    | 0    | 975       |
| Liver Failure                      | Diagnosed   | 1    | 1    | 0    | 0    | 0    | 3,248     |
| <b>Total</b>                       |             | 196  | 126  | 74   | 33   | 0    | 1,035,093 |
| <b>Life Years Gained</b>           |             | 2    | 1    | -1   | -1   | 0    | 1,164     |
| <b>Quality Adjusted Life Years</b> |             |      |      |      |      |      |           |
| Not Chronic                        |             | 49   | 31   | 19   | 8    | 0    |           |
| Stage 0/1                          | Diagnosed   | 20   | 12   | 7    | 3    | 0    | 234,001   |
| Stage 0/1                          | Undiagnosed | 15   | 9    | 6    | 3    | 0    | 178,830   |
| Stage 2/3                          | Diagnosed   | 29   | 19   | 11   | 5    | 0    | 123,751   |
| Stage 2/3                          | Undiagnosed | 11   | 8    | 4    | 2    | 0    | 47,289    |
| Cirrhosis                          | Diagnosed   | 34   | 22   | 13   | 6    | 0    | 55,768    |
| Cirrhosis                          | Undiagnosed | 10   | 7    | 4    | 2    | 0    | 16,714    |
| HCC                                | Diagnosed   | 0    | 0    | 0    | 0    | 0    | 98        |
| Liver Failure                      | Diagnosed   | 0    | 0    | 0    | 0    | 0    | 1,039     |
| <b>Total</b>                       |             | 168  | 108  | 64   | 29   | 0    | 916,265   |
| <b>HCV QALYs Gained</b>            |             | 30   | 19   | 9    | 3    | 0    | 119,992   |
| <b>All Life Years Gained</b>       |             | 2    | 1    | -1   | -1   | 0    | 588,726   |
| <b>All QALYs Gained</b>            |             | 30   | 19   | 9    | 3    | 0    | 835,237   |

---

---

## APPENDIX F

## REFERENCES

---

## REFERENCES TO STUDIES USED IN THE ECOLOGICAL ANALYSIS

- Aitken C, Brough R, Crofts N. *Injecting drug use and blood-borne viruses: a comparison of rural and urban Victoria, 1990-95*. Drug & Alcohol Review 1999; 18(1):47-52.
- Alfonso GR, Hurtado N, I, Espacio CA, Santos RG, Tomas DS. *Risk behaviours and seroprevalence to HIV, HBV and HCV in patients of the AIDS information and prevention center in Valencia, Spain*. Gaceta Sanitaria 1999; 13(1):16-21.
- Australian National Study of AIDS and Injecting Drug Use Study, (ANAIDUS) (1991). *Neither a borrower nor a lender be: First report of the Australian National AIDS and injecting drug use study, 1989 data collection*. National Centre in HIV Social Research, University of New South Wales, Sydney.
- Azevedo-Neto RS, RC Bueno, F Mesquita, et al. *HIV Seroprevalence in IDUs from Santos: General Trends and Gender Analysis*. XI International Conference on AIDS, Vancouver, 1996; 7/7-14, Abstract Tu.C.2493.
- Baozhang T, Kaining Z, Jinxing K, Ruchang X, Ming L, Caixia Z, Li T. *Infection with human immunodeficiency virus and hepatitis viruses in Chinese drug addicts*. Epidemiology & Infection 1997; 119(3):343-347.
- Battjes RJ, Pickens RW, Brown LS (1995). *HIV infection and AIDS risk behaviours among injecting drug users entering Methadone Treatment: An update*. J Acq Immune Def Syndr & Human Retro, 10: 90-96.
- Bell J, Batey RG, Farrell GC, Crewe EB, Cunningham AL, Byth K. *Hepatitis C virus in intravenous drug users*. Medical Journal of Australia 1990; 153(5):274-276.
- Blacker P, Tindall B, Wodak A, Cooper D (1986). *Exposure of intravenous drug users to AIDS retrovirus, Sydney, 1985*. Aust & NZ J of Med, 16: 686-690.
- Bluthenthal RN, Kral AH, Lorvick JJ. *Risk behaviours among clients of tolerated and underground syringe exchange programs in the San Francisco Bay area*. 1996
- Bolumar F, Hernandez-Aguado I, Ferrer L, Ruiz I, Avino MJ, Rebagliato M. *Prevalence of antibodies to hepatitis C in a population of intravenous drug users in Valencia, Spain, 1990-1992*. International Journal of Epidemiology 1996; 25(1):204-209.
- Brajachand-Singh N, Ibotomba-Singh Y. *Absence of Serological Evidence of HIV in Manipur, a Border State of India*. Virus Information Exchange Newsletter. 1987; 4(3): 81.
- Broers B, Junet C, Bourquin M, Deglon JJ, Perrin L, Hirschel B. *Prevalence and incidence rate of HIV, hepatitis B and C among drug users on methadone maintenance treatment in Geneva between 1988 and 1995*. AIDS 1998; 12(15):2059-2066.
- Brunton C, Kemp R, Raynel P, Harte D, Baker M. *Cumulative incidence of hepatitis C seroconversion in a cohort of seronegative injecting drug users*. New Zealand Medical Journal 2000; 113(1106):98-101.
- Byrne A, Wodak A. *Census of patients receiving methadone treatment in a general practice*. Addiction Research 1996; 3(4):341-349.
- Byrne A (2000). *Nine year follow-up of 86 consecutive patients treated with methadone in general practice, Sydney, Australia*. Drug & Alcohol Rev, 19: 153-158.
- Cahn P, Perez H, Casiro A, et al. *Analysis of Spontaneous Attendance at an AIDS Consulting Centre in the City of Buenos Aires*. Medicina (Buenos Aires) 1988; 48: 125-131.

---

Cao K, Mizokami M, Orito E, Ding X, Ge XM, Huang GY, Ueda R. *TT virus infection among IVDUs in south western China*. Scandinavian Journal of Infectious Diseases 1999; 31(1):21-25.

Carruthers S, Loxley W. *Hepatitis C and young drug users: are they about to join the epidemic?* Australian Journal of Public Health 1995; 19(4):421-424

Carter H, Robinson G, Hanlon C, Hailwood C, Massarotto A. *Prevalence of hepatitis B and C infection in a methadone clinic population: implications for hepatitis B vaccination*. New Zealand Medical Journal 2001; 114(1136):324-326.

Celentano DD, Jittiwutikorn J, Hodge MJ, et al. *Epidemiology of HIV-1 Infection in Opiate Users in Northern Thailand*. Journal of Acquired Immune Deficiency Syndromes and Human Retrovirology. 1997; 17(1): 73-78.

Chamot E, de Saussure P, Hirschel B, Deglon JJ, Perrin LH. *Incidence of hepatitis C, hepatitis B and HIV infections among drug users in a methadone-maintenance programme*. AIDS 1992; 6(4):430-431.

Chamot E, Hirschel B, Wintch J, Robert CF, Gabriel V, Deglon JJ, Yerly S, Perrin L. *Loss of antibodies against hepatitis C virus in HIV-seropositive intravenous drug users*. AIDS 1990; 4(12):1275-1277.

Chang CJ, Ko YC, Liu HW. *Serum alanine aminotransferase levels in relation to hepatitis B and C virus infections among drug abusers in an area hyperendemic for hepatitis B*. Digestive Diseases & Sciences 2000; 45(10):1949-1952.

Chen DS, Kuo GC, Sung JL, Lai MY, Sheu JC, Chen PJ, Yang PM, Hsu HM, Chang MH, Chen CJ. *Hepatitis C virus infection in an area hyperendemic for hepatitis B and chronic liver disease: the Taiwan experience*. Journal of Infectious Diseases 1990; 162(4):817-822.

Chetwynd J, Brunton C, Blank M, Plumridge E, Baldwin D. *Hepatitis c seroprevalence amongst injecting drug users attending a methadone programme*. New Zealand Medical Journal 1995; 108(1007):364-366.

Choopanya K, Des Jarlais DC, Vanichseni S, et al. *Risk Factors for HIV Seroprevalence among IDUs in Bangkok, 1989 vs. 1993*. Tenth International Conference on AIDS, Yokohama, Japan. 1994; 8/7-12, Abstract P.C.0125.

Coppola RC, Masia G, di Martino ML, Carboni G, Muggianu E, Piro R, Manconi PE. *Sexual behaviour and multiple infections in drug abusers*. European Journal of Epidemiology 1996; 12(5):429-435.

Corona R, Prignano G, Mele A, Gentili G, Caprilli F, Franco E, Ferrigno L, Giglio A, Titti F, Bruno C. *Heterosexual and homosexual transmission of hepatitis C virus: relation with hepatitis B virus and human immunodeficiency virus type 1*. Epidemiology & Infection 1991; 107(3):667-672.

Crofts N, Aitken CK. *Incidence of blood borne virus infection and risk behaviours in a cohort of injecting drug users in Victoria, 1990-1995*. Medical Journal of Australia 1997; 167(1):17-20.

Crofts N. *Surveillance for HIV Infection and AIDS*. World Health Organization, Global Programme on AIDS, Kuala Lumpur, Malaysia, 7-27 October 1991, mission report. 1992.

Crofts N, Hopper JL, Bowden DS, Breschkin AM, Milner R, Locarnini SA. *Hepatitis C virus infection among a cohort of Victorian injecting drug users*. Medical Journal of Australia 1993; 159(4): 237-241

Crofts N, Hopper JL, Milner R, Breschkin AM, Bowden DS, Locarnini SA. *Blood-borne virus infections among Australian injecting drug users: implications for spread of HIV*. European Journal of Epidemiology 1994; 10(6):687-694.

Crofts N, Stewart T, Hearne P, Ping XY, Breshkin AM, Locarnini SA. *Spread of blood borne viruses among Australian prison entrants*. BMJ 1995; 310(6975):285-288.



---

Crofts N, Nigro L, Oman K, Stevenson E, Sherman J. *Methadone maintenance and hepatitis C virus infection among injecting drug users*. *Addiction* 1997; 92(8):999-1005.

Dan M, Rock M, Bar-Shany S. *Prevalence of Antibodies to Human Immunodeficiency Virus among Intravenous Drug Users in Israel - Association with Travel Aboard*. *International Journal of Epidemiology*. 1989; 18(1): 239-241.

Dan M. *HIV Infection and Intravenous Drug Abuse: World Perspective and Epidemiology in Israel*. *Israel Journal of Medical Sciences*. 1993; 29(10) (Suppl.): 11-14.

Darke S, Baker A, Dixon J, Wodak A, Heather N. *Drug use and HIV-risk taking among clients in methadone maintenance treatment*. *Drug & Alcohol Dependence*, 1992a 29: 263-268.

de Carvalho HB, Mesquita F, Massad E, Bueno RC, Lopes GT, Ruiz MA, Burattini MN. *HIV and infections of similar transmission patterns in a drug injectors community of Santos, Brazil*. *Journal of Acquired Immune Deficiency Syndromes* 1996; 12(1):84-92.

Delgado-Iribarren A, Calvo M, Perez A, del Alamo M, Cercenado S. *Intravenous drug users serologic control: what may be prevented?* [Spanish]. *Enfermedades Infecciosas y Microbiologia Clinica* 2000; 18(1):2-5.

Denham I & Hayes P. *Human immunodeficiency virus antibody testing at the Melbourne Sexually Transmitted Diseases Centre 1984-1989. Six years and 17,382 tests*. *Venerology*, 1990, 3: 4-11.

Denis B, Dedobbeleer M, Collet T, Petit J, Jamouille M, Hayani A, Brenard R. *High prevalence of hepatitis C virus infection in Belgian intravenous drug users and potential role of the "cotton-filter" in transmission: the GEMT Study*. *Acta Gastroenterologica Belgica* 2000; 63(2):147-153.

Des Jarlais DC., Subhachaturas W, Vanichseni S, et al. *Sexual Risk Behaviors of Injecting Drug Users in Bangkok, Thailand*. 12th World AIDS Conference, Geneva. 1998; 6/28-7/3, Abstract 23154.

Diamantis I, Bassetti S, Erb P, Ladewig D, Gyr K, Battegay M. *High prevalence and coinfection rate of hepatitis G and C infections in intravenous drug addicts*. *Journal of Hepatology* 1997; 26(4):794-797.

Diaz T, Des J, Vlahov D, Perlis TE, Edwards V, Friedman SR, Rockwell R, Hoover D, Williams IT, Monterroso ER. *Factors associated with prevalent hepatitis C: differences among young adult injection drug users in lower and upper Manhattan, New York City*. *American Journal of Public Health* 2001; 91(1):23-30.

Dimitrakopoulos A, Takou A, Haida A, Molangeli S, Gialeraki A, Kordossis T. *The prevalence of hepatitis B and C in HIV-positive Greek patients: relationship to survival of deceased AIDS patients*. *Journal of Infection* 2000; 40(2):127-131.

Donovan B, Finlayson RJ, Mutimer K. *HIV infection in sexually transmissible disease practice in Sydney: the effects of legislation, public education and changing clinical spectrum*. *Int J of STD & AIDS*, 1990, 1: 21-27.

Donahue JG, Nelson KE, Munoz A, Vlahov D, Rennie LL, Taylor EL, Saah AJ, Cohn S, Odaka NJ, Farzadegan H. *Antibody to hepatitis C virus among cardiac surgery patients, homosexual men, and intravenous drug users in Baltimore, Maryland*. *American Journal of Epidemiology* 1991; 134(10):1206-1211.

Dourado I, Andrade T, Montes JC, et al. *Human Retrovirus in a Brazilian City with a Population Predominantly of African Origin: Evidences for High Prevalence*. XI International Conference on AIDS, Vancouver. 1996; 7/7-14, Poster Pub.C.1132.

Duburcq A, Charpak Y, Blin P, Madec L. *Two years follow-up of heroin users treated by GPs with high dosage buprenorphine: the SPESUB study (pharmaco-epidemiological follow-up of high dosage buprenorphine in general practice)* [French]. *Revue d Epidemiologie et de Sante Publique* 2000; 48(4):363-373.

---

Dwyer D, Bell J, Batey R, et al. *Low prevalence of human immunodeficiency virus infection in methadone program attenders and pregnant intravenous drug users in the western metropolitan region of Sydney.* *Aus & NZ J of Med*, 1989, 19: 407-408.

Edeh J, Spalding P. *Screening for HIV, HBV and HCV markers among drug users in treatment in rural south-east England.* *Journal of Public Health Medicine* 2000; 22(4):531-539.

Eicher AD, Crofts N, Benjamin S, Deutschmann P, Rodger AJ. *A certain fate: spread of HIV among young injecting drug users in Manipur, North-East India.* *AIDS Care* 2000; 12(4):497-504.

European Centre for the Epidemiological Monitoring of AIDS (ECDMA). *HIV/AIDS surveillance in Europe. Mid Year report 2001.* 2001 No. 65.

European Monitoring Centre for Drugs and Drug Addiction (EMCDDA) *Annual report on the state of the drugs problem in the European Union, 2000.* Office for Official Publications of the European Communities, Luxembourg.

Fairley CK, Leslie DE, Nicholson S, Gust ID. *Epidemiology and hepatitis C virus in Victoria.* *Medical Journal of Australia* 1990; 153(5):271-273.

Ferreira A, Arevalo E, Fernandes NEL, et al. *HIV Infection among Users and Non Users of Injected Drugs.* VIII International Conference on AIDS, Amsterdam, 1992; 7/19-24, Abstract PuC 8072.

Fingerhood MI, Jasinski DR, Sullivan JT. *Prevalence of Hepatitis C in a chemically dependent population.* *Archives of Internal Medicine* 1993; 153(17):2025-2030.

Fisher DG, Fenaughty AM, Paschane AA, Paschane DM, Cagle HH, Orr SM. *Hepatitis c virus infection among Alaskan drug users.* *American Journal of Public Health* 1997; 87(10):1722-1724.

Francisci D, Baldelli F, Papili R, Stagni G, Pauluzzi S. *Prevalence of HBV, HDV and HCV hepatitis markers in HIV-positive patients.* *European Journal of Epidemiology* 1995; 11(2):123-126.

Friedman SR, Des Jarlais DC. *HIV among drug injectors: the epidemic and the response.* *AIDS Care* 1991,3 (3) 239-250

Friedman SR, Jose B, Deren S, Des Jarlais DC, *Neagigus for the National AIDS Research Consortium. Risk factors for human immunodeficiency virus seroconversion among out-of-treatment drug injectors in high and low seroprevalence cities.* 1995, 142,(8):864-874.

Frischer M, Bloor M, Green S, Goldberg D, Covell R, McKeganey, Taylor. *Reduction in needle sharing among community wide samples of injecting drug users.* *International Journal of STD & AIDS* 1992; 3: 288-290.

Freeman AJ, Zekry A, Whybin LR, Harvey CE, van Beek IA, de Kantzow SL, Rawlinson WD, Boughton CR, Robertson PW, Marinos G, Lloyd AR. *Hepatitis C prevalence among Australian injecting drug users in the 1970s and profiles of virus genotypes in the 1970s and 1990s.* *Medical Journal of Australia* 2000; 172(12):588-591.

Fuglsang T, Fouchard JR, Ege PP. *Prevalence of HIV and hepatitis B and C among drug addicts in the city of Copenhagen.* [Danish]. *Ugeskrift for Laeger* 2000; 162(27):3860-3864.

Galeazzi B, Tufano A, Barbierato E, Bortolotti F. *Hepatitis C virus infection in Italian intravenous drug users: epidemiological and clinical aspects.* *Liver* 1995; 15(4):209-212.

Garfein RS, Vlahov D, Galai N, Doherty MC, Nelson KE. *Viral infections in short-term injection drug users: the prevalence of hepatitis c hepatitis B, human immunodeficiency and human T-lymphotropic viruses.* *American Journal of Puclic Health* 1996; 86 (5): 655-661.

---

Garfein RS, Doherty MC, Monterroso ER, Thomas DL, Nelson KE, Vlahov D. *Prevalence and incidence of hepatitis C virus infection among young adult injection drug users*. Journal of Acquired Immune Deficiency Syndromes 1998; 18 Suppl 1:S11-S19.

Garner JJ, Gaughwin M, Dodding J, Wilson K. *Prevalence of hepatitis C infection in pregnant women in South Australia*. Medical Journal of Australia 1997; 167(9):470-472.

Gaughwin M, Dodding J, Ali R. *Hepatitis C and the history of injecting drug use in South Australia*. [letter; comment]. Medical Journal of Australia 1994; 161(4):286.

Gaughwin MD & Ali R. *HIV infection among injecting drug users in the South Australian methadone program*. Med J Aust, 1995, 162: 242-244.

Gianna MC, Chequer P, Castilho E, et al. *Profile of IVDU in an AIDS Reference Center, Sao Paulo, Brazil, 1988*. VI International Conference on AIDS, San Francisco, 1990; 6/20-24, Poster Th.C.713.

Girardi E, Zaccarelli M, Tossini G, Puro V, Narciso P, Visco G. *Hepatitis C virus infection in intravenous drug users: prevalence and risk factors*. Scandinavian Journal of Infectious Diseases 1990; 22(6):751-752.

Giuliani M, Caprilli F, Gentili G, Maini A, Lepri AC, Prignano G, Palamara G, Giglio A, Crescimbeni E, Rezza G. *Incidence and determinants of hepatitis c virus infection among individuals at risk of sexually transmitted diseases attending a human immunodeficiency virus type 1 testing program*. Sexually Transmitted Diseases 1997; 24(9):533-537.

Guimaraes ML, Bastos FI, Telles PR, Galvao-Casto B, Diaz RS, Bongertz V, Morgado MG. *Retrovirus infections in a sample of injecting drug users in Rio de Janeiro City, Brazil: prevalence of HIV-1 subtypes, and co-infection with HTLV-I/II*. Journal of Clinical Virology, 2001; 21: 143-151.

Goldberg D, Burns S, Taylor A, Cameron S, Hargreaves D, Hutchinson S. *Trends in HCV prevalence among injecting drug users in Glasgow and Edinburgh during the era of needle/syringe exchange*. Scandinavian Journal of Infectious Diseases 2001a; 33(6):457-461.

Goldberg D, Cameron S, McMenamin J. *Hepatitis C virus antibody prevalence among injecting drug users in Glasgow has fallen but remains high*. Communicable Disease & Public Health 1998; 1(2):95-97.

Goldberg D, Cameron S, Sharp G, Burns S, Scott G, Molyneaux P, Scoular A, Downie A, Taylor A. *Hepatitis C virus among genitourinary clinic attenders in Scotland: unlinked anonymous testing*. International Journal of STD & AIDS 2001b; 12(1):17-21.

Goldberg D, McIntyre PG, Smith R, Appleyard K, Dunlop J, Taylor A, Hutchinson S. *Hepatitis C virus among high and low risk pregnant women in Dundee: unlinked anonymous testing*. British Journal of Obstetrics & Gynaecology 2001c; 108(4):365-370.

Gore SM, Brettle RP, Burns SM, Lewis SC. *Pilot study to estimate survivors to 1995 of 1983-1984 prevalent hepatitis c infections in lothian patients who tested positive or negative for hepatitis b surface antigen in 1983-1984*. Journal of Infection 1998; 37(2):159-165.

Guadagnino V, Zimatore G, Rocca A, Montesano F, Masciari R, Caroleo B, Izzi A, Morabito D, Naso E, Scicchitano R. *Anti-hepatitis C antibody prevalence among intravenous drug addicts in the Catanzaro area*. Archives of Virology - Supplementum 1992; 4:335-336.

Hagan H, Jarlais DC, Friedman SR, Purchase D, Alter MJ. *Reduced risk of hepatitis B and hepatitis C among injection drug users in the Tacoma syringe exchange program*. American Journal of Public Health 1995; 85(11):1531-1537.

---

Hagan H, McGough JP, Thiede H, Weiss NS, Hopkins S, Alexander ER. *Syringe exchange and risk of infection with hepatitis B and C viruses*. American Journal of Epidemiology 1999; 149(3):203-213.

Hagan H, Thiede H, Weiss NS, Hopkins SG, Duchin JS, Alexander ER. *Sharing of drug preparation equipment as a risk factor for hepatitis C*. American Journal of Public Health 2001; 91(1):42-46.

Hahn RA, Onorato IM, Jones TS, Dougherty J. *Prevalence of HIV infection among intravenous drug users in the United States*. JAMA, 1989; Vol 261, No. 18: 2677-2684.

Hahn JA, Page-Shafer K, Lum PJ, Ochoa K, Moss AR. *Hepatitis C virus infection and needle exchange use among young injection drug users in San Francisco*. Hepatology 2001; 34(1): 180-187.

Hamers FF, Batter V, Downs AM, Alix J, Cazein F, Brunet JB. *The HIV epidemic associated with injecting drug use in Europe: geographic and time trends*. AIDS 1997, 11:1365-1374.

Harsch HH, Pankiewicz J, Bloom AS, Rainey C, Cho JK, Sperry L, Stein EA. *Hepatitis C virus infection in cocaine users - a silent epidemic*. Community Mental Health Journal 2000; 36(3):225-233.

Hart GJ, Woodward N, Johnson AM, Tighe J, Parry JV, Adler MW. *Prevalence of HIV, hepatitis B and associated risk behaviors in clients of a needle-exchange in central London*. AIDS 1992, 5:543-547.

Health Canada. *Inventory of HIV incidence and prevalence studies in Canada*. April 2000.

Htoon MT, Lwin HH, San KO, et al. *HIV/AIDS in Myanmar*. AIDS. 1994; 8(suppl. 2): S105-S109.

Hwang LY, Ross MW, Zack C, Bull L, Rickman K, Holleman M. *Prevalence of sexually transmitted infections and associated risk factors among populations of drug abusers*. Clinical Infectious Diseases 2000; 31(4):920-926.

Ichimura H, Kurimura O, Tamura I, Tsukue I, Tsuchie H, Kurimura T. *Prevalence of blood-borne viruses among intravenous drug users and alcoholics in Hiroshima, Japan*. International Journal of STD & AIDS 1995; 6(6):441-443.

Inciardi JA, Surratt H, Telles P, et al. *Risks for HIV-1 Infection and Seropositivity Rates among Cocaine Users in Rio de Janeiro, Brazil*. XI International Conference on AIDS, Vancouver. 1996; 7/7-14, Session Th.C.425.

Inciardi J, McBride D, Surratt H, et al. *Reducing HIV Risk among Cocaine Users in Rio de Janeiro, Brazil*. 12th World AIDS Conference, Geneva. 1998; 6/28 - 7/3, Poster 33407.

Iqbal N. *Substance dependence - A hospital based survey*. Saudi Medical Journal 2000; 21(1):51-57.

Iguchi MY, Bux DA, Lidz V, Kushner H, French JF, Platt JJ. *Interpreting HIV seroprevalence data from a street-based outreach program*. Journal of Acquired Immune Deficiency Syndromes 1994, 7:491-499.

Ismail R. *HIV/AIDS in Malaysia*. AIDS. 1998; 12 (Suppl B):S33-S41.

Jiang JJ, Dubois F, Driss F, Carnot F, Thepot V, Pol S, Berthelot P, Brechot C, Nalpas B. *Clinical impact of drug addiction in alcoholics*. Alcohol & Alcoholism 1995; 30(1):55-60.

Johnson Z, O'Connor M, Pomeroy L, Johnson H, Barry J, Scully M, Fitzpatrick E. *Prevalence of HIV and associated risk behavior in attendees at a Dublin needle exchange*. Addiction 1994; 89 (5): 603-607.

Kelen GD, Green GB, Purcell RH, Chan DW, Qaqish BF, Sivertson KT, Quinn TC. *Hepatitis B and hepatitis C in emergency department patients*. New England Journal of Medicine 1992; 326(21):1399-1404.

---

Kemp R, Miller J, Lungley S, Baker M. *Injecting behaviours and prevalence of hepatitis B, C and D markers in New Zealand injecting drug user populations*. New Zealand Medical Journal 1998; 111(1060):50-53.

Kitayaporn D, Vanichseni S, Mastro TD, et al. *Infection with HIV-1 Subtypes B and E in Injecting Drug Users Screened for Enrollment into a Prospective Cohort in Bangkok*. Journal of Acquired Immune Deficiency Syndromes and Human Retrovirology. 1998; 19(3): 289-295.

Krook A, Albert J, Andersson S, Biberfeld G, Blomberg J, Eklund I, Engstrom A, Julander I, Kall K, Martin C, Stendahl P, Struve J, Sonnerborg A. *Prevalence and risk factors for HTLV-II infection in 913 injecting drug users in Stockholm, 1994*. Journal of Acquired Immune Deficiency Syndromes 1997; 15(5):381-386.

Lal S. *AIDS - A Priority Health Problem in India*. Swasth Hind. 1991; 35: 277.

Lamden KH, Kennedy N, Beeching NJ, Lowe D, Morrison CL, Mallinson H, Mutton KJ, Syed Q. *Hepatitis B and hepatitis C virus infections: Risk factors among drug users in Northwest England*. Journal of Infection 1998; 37(3):260-269.

Laskus T, Radkowski M, Werezynska T, Horban A, Lupa E, Cianciara J, Slusarczyk J. *Occurrence of antibodies against hepatitis C virus (HCV) among drug addicts*. [Polish]. Polskie Archiwum Medycyny Wewnetrznej 1992; 87(1):8-13.

Latt NC, Spencer JD, Beeby PJ, McCaughan GW, Saunders JB, Collins E, Cossart YE. *Hepatitis C in injecting drug-using women during and after pregnancy*. Journal of Gastroenterology & Hepatology 2000; 15(2):175-181.

Lee SD, Chan CY, Wang YJ, Wu JC, Lai KH, Tsai YT, Lo KJ. *Seroepidemiology of hepatitis C virus infection in Taiwan*. Hepatology 1991; 13(5):830-833.

Lestrem, MD, Fainboim H, Mendez N, et al. *HIV-1 Infection in Intravenous Drug Abusers with Clinical Manifestation of Hepatitis in the City of Buenos Aires*. In: AIDS Profile of an Epidemic, PAHO, Scientific Publication. 1989; 514: 51-60.

Li D, Zheng X, Zhang G. *Prevalence of HIV and HCV among injecting drug users (IDUs) in Yunnan, China*. [Chinese]. Chung-Hua Liu Hsing Ping Hsueh Tsa Chih Chinese Journal of Epidemiology 1994; 15(2):74-75.

Libonatti O, Lima E, Peruga A, et al. *Role of Drug Injection in the Spread of HIV in Argentina and Brazil*. International Journal of STD and AIDS. 1993; 4: 135-141.

Lima ES, Azevedo RCS, Manfrinatti MB, et al. *Risk Behaviors for HIV-1 Seroprevalence in a Sample of Injecting Drug Users (IDUS) and Crack Smokers (CSS) in Campinas, Brazil*. XI International Conference on AIDS, Vancouver. 1996; 7/7-14, Abstract Pub.C.1133.

Lindan CP, Lieu TX, Giang LT, et al. *Rising HIV Infection Rates in Ho Chi Minh City Herald Emerging AIDS Epidemic in Vietnam*. AIDS. 1997; 11(supp. 1): S5-S13.

Lohsomboon P, Young NL, Weniger BG, et al. *Nondetection of HTLV-III and HIV-2 in Thailand, 1991-1992*. Journal of Acquired Immune Deficiency Syndromes. 1994; 7(9): 992-994.

Lopez-Zetina J, Ford W, Weber M, Barna S, Woerhle T, Kerndt P, Monterroso E. *Predictors of syphilis seroreactivity and prevalence of HIV among street recruited injection drug users in Los Angeles County, 1994-6*. Sexually Transmitted Infections 2000; 76:462-469.

Lorvick J, Kral AH, Seal K, Gee L, Edlin BR. *Prevalence and duration of hepatitis C among injection drug users in San Francisco, Calif*. American Journal of Public Health 2001; 91(1):46-47.

---

Love A, Stanzeit B. *Hepatitis C virus infection in Iceland: a recently introduced blood-borne disease.* *Epidemiology & Infection* 1994; 113(3):529-536.

Loxley WM, Marsh AM, Hawks DV, Quigley AJ. *HIV risk behaviour among injecting drug users in Perth: the Australian National AIDS and injecting drug use study.* *Med J Aust*, 1992, 156: 687-692.

Loxley W, Ovenden C. *Friends and lovers: needle sharing in young people in Western Australia.* *AIDS Care* 1995; 7(3):337-351.

Lucidarme D, Foutrein P, Creusy C, Forzy G, Foutrein-Comes MC, Muysen A, Bailly D, Parquet PJ, Filoche B. *Prevalence of hepatitis C, B and D markers and histopathological aspects in a group of intravenous drug addicts.* [French]. *Gastroenterologie Clinique et Biologique* 1994; 18(11):964-968.

Luksamijarulkul P, Plucktaweesak S. *High hepatitis C seroprevalence in Thai intravenous drug abusers and qualitative risk analysis.* *Southeast Asian Journal of Tropical Medicine & Public Health* 1996; 27(4):654-658.

Maayan S, Shufman EN, Engelhard D, Shouval D. *Exposure to hepatitis B and C and to HTLV-1 and 2 among Israeli drug abusers in Jerusalem.* *Addiction* 1994; 89(7):869-874.

MacDonald M, Sullivan P, Locke A, Wodak A, Kaldor J. *HIV and HCV prevalence among trawler crew.* *Australian & New Zealand Journal of Public Health* 1998; 22(7):829-831.

Majid A, Holmes R, Desselberger U, Simmonds P, McKee TA. *Molecular epidemiology of hepatitis C virus infection amongst intravenous drug users in rural communities.* *Journal of Medical Virology* 1995; 46(1):48-51.

Mansson AS, Moestrup T, Nordenfelt E, Widell A. *Continued transmission of hepatitis B and C viruses, but no transmission of human immunodeficiency virus among intravenous drug users participating in a syringe/needle exchange program.* *Scandinavian Journal of Infectious Diseases* 2000; 32(3):253-258.

Marmor M, Des Jarlaid DC, Cohen H, Friedman SR, Beatrice ST, Dubin N, El-Sadr W, Mildvan D, Yancovitz S, Mathur U, Holzman R. *AIDS* 1987, 1:39-44.

McDonald AM, Whyte BM, Jacobs D, et al. *Voluntary HIV antibody testing among STD clinic patients: A pilot study.* *Med J Aust*, 1990, 153: 12-14.

McIntyre PG, Hill DA, Appleyard K, Taylor A, Hutchinson S, Goldberg DJ. *Prevalence of antibodies to hepatitis C virus, HIV and human T-cell leukaemia/lymphoma viruses in injecting drug users in Tayside, Scotland, 1993-7.* *Epidemiology & Infection* 2001; 126(1):97-101.

McKenna JG, Evans G, Lytle PH, Couper A. *Hepatitis C virus seroprevalence in patients attending a sexual health centre.* *New Zealand Medical Journal* 1994; 107(970):8-10.

Mesquita F, Moss AR, Reingold AL, et al. *Pilot Study of HIV Antibody Seroprevalence among IVDUs in the City of Santos Sao Paulo State, Brazil.* VII International Conference on AIDS, Florence, Italy, 1991; 6/16-21, Poster M.C.3008.

Metzger DS, Woody GE, McLellan T, O'Brien CP, Druley P, Navaline H, DePhilippis D, Stolley P, Abrutyn E. *Human immunodeficiency virus seroconversion among intravenous drug users in-and out-of-treatment: an 18 month prospective follow up.* *Journal of Acquired Immune Deficiency Syndromes* 1993; 6:1049-1056.

Ministry of Public Health Thailand. *National Sentinel Seroprevalence Survey.* 1991; (Oct. 28; Feb. 21), 1992 (June), 1993 (June & December), 1994 (June & December), 1996 (June), 1997 (June), 1998 (June), Unpublished tables.

---

Montoya ID, Atkinson JS. *Determinants of HIV seroprevalence rates among sites participating in a community-based study of drug users*. Journal of Acquired Immune Deficiency Syndromes and Human Retrovirology 1996; 13: 169-176.

Moriarty H, Kemp R, Robinson G. *Hepatitis services at an injecting drug user outreach clinic*. New Zealand Medical Journal 2001; 114(1128):105-106.

Morlet A, Darke S, Guinan J, Wolk J, Gold J). *Intravenous drug users who present to the Albion Street (AIDS) Centre for diagnosis and management of Human Immunodeficiency Virus infection*. Med J Aust. 1990, 152: 78-80.

Moss AR, Vranizan K, Gorter R, Bacchetti, Watters J, Osmond D. *HIV seroconversion in intravenous drug users in San Francisco, 1985 – 1990*. AIDS 1994, 8:223-231.

Muchnik GR, Picchio GR, Bouzas MB, et al. *Seroepidemiology of Human Immunodeficiency Virus in Low and High Risk Groups in Buenos Aires, Argentina*. AIDS-Forschung 1988; 3(2): 89-93.

National Centre in HIV Epidemiology and Clinical Research (NCHECR). *Annual Surveillance Report 2000: HIV/AIDS, hepatitis C and sexually transmissible infections in Australia*. 2001

Neuwald C, Pont J, Tomasits J, Bauer K. *Antibody prevalence for hepatitis C and other parenterally transmissible viral diseases in i.v. drug dependent patients*. [German]. Acta Medica Austriaca 1992; 19(2):47-48.

Oliveira ML, Bastos FI, Telles PR, Yoshida CF, Schatzmayr HG, Paetzold U, Pauli G, Schreier E. *Prevalence and risk factors for HBV, HCV and HDV infections among injecting drug users from Rio de Janeiro, Brazil*. Brazilian Journal of Medical & Biological Research 1999; 32(9):1107-1114.

Osmond DH, Padian NS, Sheppard HW, Glass S, Shiboski SC, Reingold A. *Risk factors for hepatitis C virus seropositivity in heterosexual couples*. JAMA 1993; 269(3):361-365.

Osztrogonacz H, Gerevich J, Horvath G, Tolvaj G, David K. *Prevalence of chronic viral hepatitis in drug abusers*. [Hungarian]. Orvosi Hetilap 2000; 141(14):715-718.

Pal SC, Sarkar S, Naik TN, et al. *Explosive Epidemic of HIV Infection in North Eastern States of India, Manipur and Nagaland*. CARC Calling. 1990; 3(3): 2-6.

Panda S, Sarkar S, Mandal BK, et al. *Epidemic of Herpes Zoster Following HIV Epidemic in Manipur, India*. Journal of Infection. 1994; 28: 167-173.

Patti AM, Santi AL, Pompa MG, Giustini C, Vescia N, Mastroeni I, Fara GM. *Viral hepatitis and drugs: a continuing problem*. International Journal of Epidemiology 1993; 22(1):135-139.

Payeras CA, Socias MM, Forteza-Rei BJ, Besalduch VJ. *Hepatitis C viral infection and the consumption of intravenous drugs*. [Spanish]. Revista de Sanidad e Higiene Publica 1992; 66(3-4):233-237.

Peak A, Rana S, Maharjan SH, et al. *Declining Risk for HIV among Injecting Drug Users in Kathmandu, Nepal: The Impact of a Harm-Reduction Programme*. AIDS. 1995; 9(9): 1067-1070.

Piribauer F, Duer W. *Trends in HIV seroprevalence, AIDS and prevention policy among intravenous drug users and men who have sex with men, before and after 1990 in Austria*. European Journal of Epidemiology 1998, 14:635-643.

Pont J, Neuwald C, Salzner G. *Antibody prevalence of parenterally transmitted viruses (HIV-1, HTLV-I, HBV, HCV) in Austrian intravenous drug users*. Infection 1991; 19(6):427-430.

---

Quaranta JF, Delaney SR, Alleman S, Cassuto JP, Dellamonica P, Allain JP. *Prevalence of antibody to hepatitis C virus (HCV) in HIV-1-infected patients (nice SEROCO cohort)*. Journal of Medical Virology 1994; 42(1):29-32.

Ramsay ME, Balogun MA, Collins M, Balraj V. *Laboratory surveillance of hepatitis C virus infection in England and Wales: 1992 to 1996*. Communicable Disease & Public Health 1998; 1(2):89-94.

Rezza G, Sagliocca L, Zaccarelli M, Nespoli M, Siconolfi M, Baldassarre C. *Incidence rate and risk factors for HCV seroconversion among injecting drug users in an area with low HIV seroprevalence*. Scandinavian Journal of Infectious Diseases 1996; 28(1):27-29.

Ribeiro TT, Brites C, Moreira ED, et al. *Serologic Validation of HIV Infection in a Tropical Area*. Journal of Acquired Immune Deficiency Syndromes. 1993; 6(3): 319-322.

Richardson C, Ancelle-Park R, Papaevangelou G for the European Community Study Group on HIV in Injecting Drug Users. *Factors associated with HIV seropositivity in European injecting users*. AIDS 1993, 7:1485-1491.

Robinson GM, Reynolds JN, Robinson BJ. *Hepatitis C prevalence and needle/syringe sharing behaviours in recent onset injecting drug users*. New Zealand Medical Journal 1995; 108(996):103-105.

Rocha M, Lima M, Tanibata P, et al. *Seroprevalence of the Markers the Hepatitis B Virus and Syphilis in Heterosexual Drug Users*. VIII International Conference on AIDS, Amsterdam, 1992 ; 7:19-24, Abstract PoC 4696.

Rodriguez OES, Gil MLM, Santana JFH, Canal JML, Sanchez AMM. *Prevalence of serologic markers of hbv, hdv, hcv and hiv in noninjection drug users compared to injection drug users in Gran Canaria, Spain*. European Journal of Epidemiology 1998; 14(6):555-561.

Rollag H, Thorvaldsen J, Kittelsen P, Bjoro K, Froland S. *Hepatitis C virus infections among persons attending special clinics dealing with problems related to social conditions*. [Norwegian]. Tidsskrift for Den Norske Laegeforening 1993; 113(19):2397-2400.

Sarkar S, Das N, Panda S, et al. *Rapid Spread of HIV among Injecting Drug Users in North-Eastern States of India*. Bulletin on Narcotics. 1993; XLV(1): 91-105.

Sarkar S, Panda S, Sarkar K, et al. *A Cross-Sectional Study on Factors Including HIV Testing and Counselling Determining Unsafe Injecting Practices among...* Indian Journal of Public Health. 1995; 39(3): 86-92.

Saha MK, Chakrabarti S, Panda S, Naik TN, Manna B, Chatterjee A, Detels R, Bhattacharya SK. *Prevalence of HCV & HBV infection amongst HIV seropositive intravenous drug users & their non-injecting wives in Manipur, India*. Indian Journal of Medical Research 2000; 111:37-39.

San Francisco Department of Health. *HIV/AIDS Epidemiology annual report 2000*. HIV/AIDS seroepidemiology and AIDS Surveillance Section.

Schmitt C, Bertel J, Jacob C. *Incidence of serological markers of hepatitis B and C viruses and HIV in a population of drug abusers hospitalized from 1990 to 1992*. [French]. Annales de Medecine Interne 1994; 145(1):7-12.

Selvey LA, Denton M, Plant AJ. *Incidence and prevalence of hepatitis c among clients of a Brisbane methadone clinic - factors influencing hepatitis c serostatus*. Australian & New Zealand Journal of Public Health 1997; 21(1):102-104.

Shah NG, Celentano DD, Vlahov D, Stambolis V, Johnson L, Nelson KE, Strathdee SA. *Correlates of enrollment in methadone maintenance treatment programs differ by HIV-serostatus*. AIDS 2000, 14:2035-2043.



---

Shirin T, Ahmed T, Iqbal A, Islam M, Islam MN. *Prevalence and risk factors of hepatitis B virus, hepatitis C virus, and human immunodeficiency virus infections among drug addicts in Bangladesh.* Journal of Health, Population & Nutrition 2000; 18(3):145-150.

Shrestha SM, Shrestha S, Tsuda F, Sawada N, Tanaka T, Okamoto H, Miyakawa Y, Mayumi M. *Infection with GB virus C and hepatitis C virus in drug addicts, patients on maintenance hemodialysis, or with chronic liver disease in Nepal.* Journal of Medical Virology 1997; 53(2):157-161.

Singh S, Crofts N. *HIV Infection among Injecting Drug Users in North-East Malaysia.* AIDS Care. 1993; 5(3): 273-281.

Sinniah M, Ooi BG. *Hepatitis C - the Malaysian story.* Singapore Medical Journal 1993; 34(2):132-134.

Smiatacz T, Wlasiuk M, Paszkiewicz J, Zielinska W. *HBV, HCV and HIV infections among drug addicts-residents of rehabilitation and social adjustment centers in the Gdansk district.* [Polish]. Przegląd Epidemiologiczny 1991; 45(4):351-355.

Smyth BP, Keenan E, O'Connor JJ. *Bloodborne viral infection in Irish injecting drug users.* Addiction 1998; 93(11):1649-1656.

Smyth BP, Keenan E, O'Connor JJ. *Evaluation of the impact of Dublin's expanded harm reduction programme on prevalence of hepatitis C among short-term injecting drug users.* Journal of Epidemiology & Community Health 1999; 53 (7):434-435.

Smyth R, Keenan E, Dorman A, O'Connor J. *Hepatitis C infection among injecting drug users attending the National Drug Treatment Centre.* Irish Journal of Medical Science 1995; 164(4):267-268.

Somainsi B, Wang J, Perozo M, Kuhn F, Meili D, Grob P, Flepp M. *A continuing concern: HIV and hepatitis testing and prevalence among drug users in substitution programmes in Zurich, Switzerland.* AIDS Care 2000; 12(4):449-460.

Spencer JD, Latt N, Beeby PJ, Collins E, Saunders JB, McCaughan GW, Cossart YE. *Transmission of hepatitis C virus to infants of human immunodeficiency virus-negative intravenous drug-using mothers: rate of infection and assessment of risk factors for transmission.* Journal of Viral Hepatitis 1997; 4(6):395-409.

Stark K, Schreier E, Muller R, Wirth D, Driesel G, Bienzle U. *Prevalence and determinants of anti-HCV seropositivity and of HCV genotype among intravenous drug users in Berlin.* Scandinavian Journal of Infectious Diseases 1995; 27(4):331-337.

Stark K, Muller R, Bienzle U, Guggenmoos-Holzmann I. *Frontloading: a risk factor for HIV and hepatitis C virus infection among injecting drug users in Berlin.* AIDS 1996; 10(3):311-317.

Stark K, Bienzle U, Vonk R, Guggenmoos-Holzmann I. *History of syringe sharing in prison and risk of hepatitis B virus, hepatitis C virus, and human immunodeficiency virus infection among injecting drug users in Berlin.* International Journal of Epidemiology 1997; 26(6):1359-1366.

Steffen T, Christen S, Blattler R, Gutzwiller F. *Infectious diseases and public health: Risk-taking behavior during participation in the Swiss program for a medical prescription of narcotics (PROVE).* Substance Use & Misuse 2001; 36(1-2):71-89.

Stein MD, Maksad J, Clarke J. *Hepatitis C disease among injection drug users: knowledge, perceived risk and willingness to receive treatment.* Drug & Alcohol Dependence 2001; 61(3):211-215.

Strathdee SA, Patrick DM, Currie SL, Cornelisse PGA, Rekart ML, Montaner JSG, Schechter MT, Oshaughnessy MV. *Needle exchange is not enough - lessons from the Vancouver injecting drug use study.* AIDS 1997; 11(8):F.

---

Subhachaturas W, Desjarcais D, Chooranya K, et al. *New Injectors in the HIV Epidemic among Injecting Drug Users in Bangkok, Thailand*. 5th International Congress on AIDS in Asia and the Pacific, Kuala Lumpur, Malaysia. 1999; 10/20-27, Abstract PTCD061.

Suganuma N, Ikeda S, Taketa K, Wang DH, Yamamoto H, Phornphukutkul K, Peerakome S, Sitvacharanum K, Jittiwutikarn J. *Risk analysis of the exposure to GB virus C/hepatitis G virus among populations of intravenous drug users, commercial sex workers and male outpatients at STD clinic in Chiang Mai, Thailand: a cross-sectional case-control study*. Acta Medica Okayama 1998; 52(3):161-167.

Telles PR, Bastos FI, Guydish J, et al. *Risk Behavior and HIV Seroprevalence among Injecting Drug Users in Rio de Janeiro, Brazil*. AIDS. 1997; 11(Suppl. 1): S35-S42.

Thiede H, Hagan H, Murrill CS. *Methadone treatment and HIV and hepatitis B and C risk reduction among injectors in the Seattle area*. Journal of Urban Health 2000; 77(3):331-345.

Thio CL, Nolt KR, Astemborski J, Vlahov D, Nelson KE, Thomas DL. *Screening for hepatitis C virus in human immunodeficiency virus-infected individuals*. Journal of Clinical Microbiology 2000; 38(2):575-577.

Thomas G. *AIDS in India: A Country-wide Threat*. AIDS in India, Rawat Publications, New Delhi. 1994; 151-168.

Thomson JA, Rodger AJ, Thompson SC, Jolley D, Byrne A, Best SJ, Crofts N. *The prevalence of hepatitis C in patients admitted with acute hepatitis to Fairfield Infectious Diseases Hospital, 1971-1975*. Medical Journal of Australia 1998; 169(7):360-363.

Thongcharoen P, Wasi C, Louisirirochanakul S, et al. *Human Immunodeficiency Virus Infection in Thailand*, Mahidol University, Bangkok. 1989; ISBN 974-586-526-5.

Thorpe LE, Ouellet LJ, Levy JR, Williams IT, Monterroso ER. *Hepatitis C virus infection: prevalence, risk factors, and prevention opportunities among young injection drug users in Chicago, 1997-1999*. Journal of Infectious Diseases 2000; 182(6):1588-1594.

Tor J, Llibre JM, Carbonell M, Muga R, Ribera A, Soriano V, Clotet B, Sabria M, Foz M. *Sexual transmission of hepatitis C virus and its relation with hepatitis B virus and HIV*. BMJ 1990; 301(6761):1130-1133.

Trisler Z, Seme K, Poljak M, Celan-Lucu B, Sakoman S. *Prevalence of hepatitis C and G virus infections among intravenous drug users in Slovenia and Croatia*. Scandinavian Journal of Infectious Diseases 1999; 31(1):33-35.

Trmal J, Kelleroval J, Koblizkova R, Krpalkova H, Holasova J. *Effect of needle and syringe exchange programs on the spread of viral hepatitis C*. [Czech]. Epidemiologie, Mikrobiologie, Imunologie 1999; 48(4):171-178.

Trubner K, Polywka S, Puschel K, Laufs R. *Hepatitis C in deceased drug addicts*. International Journal of Legal Medicine 1991; 104(5):251-254.

Ungchusak K, Sriprapandh S, Pinichapongsa S, et al. *First National Sentinel Seroprevalence Survey of HIV-1 Infection in Thailand: June 1989*. Thai AIDS Journal. 1989; 1(2): 57-74.

Unlinked Anonymous HIV surveys steering group. *Prevalence of HIV in the United Kingdom, Data to end 1998*. London. Department of Health, Public Health Laboratory Service, Institute of Child Health (London). Annual report of the unlinked anonymous prevalence monitoring programme. 1998 Prevalence of HIV in the United Kingdom.

Utsumi T, Hashimoto E, Okumura Y, Takayanagi M, Nishikawa H, Kigawa M, Kumakura N, Toyokawa H. *Heterosexual activity as a risk factor for the transmission of hepatitis C virus*. Journal of Medical Virology 1995; 46(2):122-125.

---

Vanbeek I, Buckley R, Stewart M, MacDonald M, Kaldor J. *Risk factors for hepatitis c virus infection among injecting drug users in Sydney*. Genitourinary Medicine 1994; 70(5):321-324.

Vanbeek I, Dwyer R, Dore GJ, Luo KH, Kaldor JM. *Infection with HIV and hepatitis C virus among injecting drug users in a prevention setting - retrospective cohort study*. BMJ 1998; 317(7156):433-437.

Vanderschueren S, Van Renterghem L, Plum J, Verhofstede C, Mak R, Vincke J. *Hepatitis C among risk groups for HIV and hepatitis B*. International Journal of STD & AIDS 1991; 2(3):185-187.

Vanichseni S, Wright N, Akarasewi P, et al. *Case Control Study of HIV Positivity among Male Intravenous Drug Addicts (IVDA) in Bangkok*. V International Conference on AIDS, Montreal. 1989; 6/4-9, Poster W.G.P. 19.

Vanichseni S, Sakuntanaga P, et al. *Results of Three Seroprevalence Survey for HIV in IVDU in Bangkok*. VI International Conference on AIDS, San Francisco. 1990; 6/20-24, Session F.C.105.

Vanichseni S, Choopanya K, Friedmann P, et al. *Estimated HIV Incidence among Injecting Drug Users in Bangkok Implication for a Vaccine Trial*. 3rd International Conference on AIDS in Asia and the Pacific, Chiang Mai, Thailand. 1995; 9/17-21, Poster PA813.

Vanichseni S, Kitayaporn D, Mastro TD, Mock PA, Raktham S, Des J, Sujarita S, Srisuwanvilai LO, Young NL, Wasi C, Subbarao S, Heyward WL, Esparza L, Choopanya K. *Continued high HIV-1 incidence in a vaccine trial preparatory cohort of injection drug users in Bangkok, Thailand*. AIDS 2001; 15(3):397-405.

Verbaan H, Andersson K, Eriksson S. *Intravenous drug abuse--the major route of hepatitis C virus transmission among alcohol-dependent individuals?* Scandinavian Journal of Gastroenterology 1993; 28(8):714-718.

Villano SA, Vlahov D, Nelson KE, Lyles CM, Cohn S, Thomas DL. *Incidence and risk factors for hepatitis C among injection drug users in Baltimore, Maryland*. Journal of Clinical Microbiology 1997; 35(12):3274-3277.

Vlahov D, Munoz A, Anthony JC, Cohn S, Celentano DD, Nelson KE. *Association of drug injection patterns with antibody to human immunodeficiency virus type 1 among intravenous drug users in Baltimore, Maryland*. American Journal of Epidemiology 1990, 132:5:847-856.

Vlahov D, Anthony JC, Munoz A, Margolick J, Nelson KE, Celentano DD, Solomon L, Polk BF. *The alive study: A longitudinal study of HIV-1 infection in intravenous drug users: description and methods*. Journal of Drug Issues 1991; 21(4), 759-776.

Wada K, Greberman SB, Konuma K, Hirai S. *HIV and HCV infection among drug users in Japan*. Addiction 1999; 94(7):1063-1069.

Waddell RG. *Hepatitis C and the history of injecting drug use in South Australia*. [letter; comment]. Medical Journal of Australia 1994; 161(4):286.

Weinstock HS, Bolan G, Reingold AL, Polish LB. *Hepatitis C virus infection among patients attending a clinic for sexually transmitted diseases*. JAMA 1993; 269(3):392-394.

Weniger BG, Limpakarnjanarat K, Ungchusak K, et al. *The Epidemiology of HIV Infection and AIDS in Thailand*. AIDS. 1991; 5 (suppl 2): S71-S85.

Westh H, Worm AM, Jensen BL, Kroon S, Kvinesdal B, Nielsen CM, Wantzin P. *Hepatitis C virus antibodies in homosexual men and intravenous drug users in Denmark*. Infection 1993; 21(2):115-117.

Widell A, Hansson BG, Berntorp E, Moestrup T, Johansson HP, Hansson H, Nordenfelt E. *Antibody to a hepatitis C virus related protein among patients at high risk for hepatitis B*. Scandinavian Journal of Infectious Diseases 1991; 23(1):19-24.

---

Wiebel WW, Jimenez A, Johnson W, Ouellet L, Jovanovic B, Lampinen T, Murray J, O'Brien MU. *Risk behaviour and HIV seroincidence among out-of-treatment injection drug users: a four-year prospective study*. Journal of acquired immune deficiency syndromes and Human Retrovirology 1996, 12:282-289.

Will T. *Early decline in an epidemic: evolution of the prevalences of HIV, hepatitis B, hepatitis C and aminotransferases in intravenous drug abusers in Strasbourg between 1980 and 1990*. [French]. Revue Medicale de la Suisse Romande 1999; 119(4):329-334.

Woodfield DG, Harness M, Rix-Trott K, Tsuda F, Okamoto H, Mayumi M. *Identification and genotyping of hepatitis C virus in injectable and oral drug users in New Zealand*. Australian & New Zealand Journal of Medicine 1994; 24(1):47-50.

Wolk J, Wodak A, Morlet A, Guinan JJ, Gold J). *HIV-related risk-taking behaviour, knowledge and serostatus of intravenous drug users in Sydney*. Med J Aust, 1990, 152: 453-458.

World Health Organisation Programme on Substance Abuse Collaborative Study Group (WHO PSA)). *Multi-City Study on Drug Injecting and Risk of Infection*. WHO/PSA. 1994, 94.4, Geneva.

Worm AM, Gottschau. *No change in incidence and prevalence of HIV among intravenous drug users in Copenhagen from 1985 to 1990*. Journal of acquired immune deficiency Syndromes, 1993; 6:845-848.

Wormser GP, Forseter G, Joline C, Tupper B, O'Brien TA. *Hepatitis C in HIV-infected intravenous drug users and homosexual men in suburban New York City*. JAMA 1991; 265(22):2958.

Wright NH, Vanichseni S, Akarasewi P, et al. *Was the 1988 HIV Epidemic among Bangkok's Injecting Drug Users a Common Source Outbreak?* AIDS. 1994; 8(4): 529-532.

Xinhua S, Junhua N, Qili G. *The Growing Problem of AIDS in Asia*. VI International Conference on AIDS, San Francisco, 1990; 6/24, Closing Ceremony, vol. 3, p. 93.

Ye S. *Prevalence of antibody to hepatitis C virus in 177 drug addicts*. [Chinese]. Chung-Hua Liu Hsing Ping Hsueh Tsa Chih Chinese Journal of Epidemiology 1993; 14(1):45-48.

Zeldis JB, Jain S, Kuramoto IK, Richards C, Sazama K, Samuels S, Holland PV, Flynn N. *Seroepidemiology of viral infections among intravenous drug users in northern California*. Western Journal of Medicine 1992; 156(1):30-35.

#### OTHER REFERENCES

ABS (Australia Bureau of Statistics)(1995). Deaths, Australia 1994. ABS Catalogue No. 3302.0. AGPS, Canberra, 1995.

Alcibes P, Munoz A, Vlahov D and Freidlan GH (1993). *Incubation period of human immunodeficiency virus*. Epidemiol Rev, 15: 303-318

Becker NG, Watson LF and Carlin JB (1991). *A method of non-parametric back-projection and its application to AIDS data*. Stat Med, 10: 1527-1542

Bennett WG, Inoue Y, Beck JR, et al (1997). *Estimates of the cost-effectiveness of a single course of interferon-alpha2B in patients with histologically mild chronic hepatitis C*. Ann Intern Med, 127: 855-865.

Bonkovsky HL, Woolley JM and the Consensus Interferon Study Group (1999). *Reduction of health-related quality of life in chronic hepatitis C and improvement with interferon therapy*. Hepatology, 29: 264-270.

---

Bruneau J, Lamothe F, Franco E, et al (1997). *High rates of HIV infection among injecting drug users participating in needle exchange programs in Montreal: results of a cohort study*. Am J Epidemiol, 145: 994-1002.

Des Jarlais DC, Hagan H, Friedman S, et al (1995). *Maintaining low HIV seroprevalence in populations of injecting drug users*. JAMA, 274: 1226-1231.

Drucker E, Lurie P, Wodak A and Alcabes P (1998). *Measuring harm reduction: the effects of needle and syringe exchange programs and methadone maintenance on the ecology of HIV*. AIDS, 12 (Suppl A): S217-S230.

Drummond et al (1997). *Methods for the Economic Evaluation of Health Care Programmes*; 2<sup>nd</sup> edition, Oxford University Press

English D, Holman CDJ, Milne E, et al (1995). *The quantification of drug caused morbidity and mortality in Australia, 1995 edition*. Commonwealth Department of Human Services and Health, Canberra, 1995.

Fattovich G, Giustina G, Degos F, et al (1997). *Morbidity and mortality in compensated cirrhosis type C: a retrospective follow-up study of 384 patients*. Gastroenterol, 112: 463-472.

Freeman A, Dore GJ, Law MG, Thorpe M, Von Overbeck J, Lloyd A, Marinos G and Kaldor JM (2001). *Estimating progression to cirrhosis in chronic hepatitis C*. Hepatology, 34: 809-816.

Gulich AE, Wan X, Law MG, Coates M and Kaldor JM (1999). *Risk of cancer in people with AIDS*. AIDS, 13: 839-843.

Guydish J, Bucardo J, Young M, Woods W, Grinstead O and Clark W (1993). *Evaluating needle exchange: Are there negative effects?* AIDS, 7: 871-876.

Hagan H, McGough JP, Thiede H, et al (1999). *Syringe exchange and risk of infection with hepatitis B and C viruses*. Am J Epidemiol, 149: 203-213.

Hall WD, Ross JE, Lynskey MT, Law MG and Degenhardt LJ (2000). *How many dependent heroin users are there in Australia?* Med J Aust, 173: 528-531.

Holtgrave DR and Pinkerton SD (1997). *Updates of cost of illness and quality of life estimates for use in economic evaluations of HIV prevention programs*. JAIDS, 16: 54-62.

Hurley SF, Jolley DJ and Kaldor JM (1997). *Effectiveness of needle-exchange programmes for prevention of HIV infection*. Lancet, 349: 1797-1800.

Hurley SF, Kaldor JM, Carlin JB, et al (1995). *The usage and costs of health services for HIV infection in Australia*. AIDS, 9: 777-785.

Law MG on behalf of the Hepatitis C Virus Projections Working Group (1999). *Modelling the hepatitis C virus epidemic in Australia*. J Gastro Hepatol, 14:1100-1107.

MacDonald M, Crofts N and Kaldor J (1996). *Transmission of hepatitis C: Rates, routes and cofactors*. Epidemiol Rev, 18: 137-148.

Marschner IC and Watson LF (1992). *An improved EMS algorithm for back-projection of AIDS incidence data*. Research Report 92/1, Department of Statistics, La Trobe University, Melbourne.

---

NCHECR (2001). *HIV/AIDS, viral hepatitis and sexually transmissible infections in Australia Annual Surveillance Report 2001*. National Centre in HIV Epidemiology and Clinical Research (Ed), Sydney, 2001.

Rodger AJ, Jolley D, Thompson SC, Lanigan A and Crofts N (1999). *The impact of diagnosis of hepatitis C virus on quality of life*. *Hepatology*, 30: 1299-1301.

Rosenberg PS, Gail MH and Carroll RJ (1992). *Estimating HIV prevalence and projecting AIDS incidence in the United States: a model that accounts for therapy and changes in the surveillance definition of AIDS*. *Stat Med*, 11: 1633-1655.

Schoenbaum EE, Hartel DM and Gourevitch MN (1996). *Needle exchange use among a cohort of injecting drug users*. *AIDS*, 10: 1729-1734.

Shiell A, Briggs A and Farrell G (1994). *The cost effectiveness of alpha interferon in the treatment of chronic active hepatitis C*. *Med J Aust*, 160: 268-272.

Tengs, Tammy O, Wallace, Amy, *One Thousand Health-Related Quality-of-Life Estimates*, *Medical Care*, 2000; Vol 38 No. 6: 583-637

Thorley A (1981). *Longitudinal studies of drug dependence*. In: *Drug problems in Britain: a review of ten years*. Eds: Edwards G, Busch C. Academic Press.

US Census Bureau & UNAIDS (2000). *HIV/AIDS Surveillance Data Base*. Health Studies Branch, International Programs Center Population Division, US Census Bureau, Washington.

van Ameijden EJC, van den Hoek JAR and Coutinho RA (1994). *Injecting risk behaviour among drug users in Amsterdam 1986 to 1992, and its relationship to AIDS prevention programs*. *Am J Pub Health*, 84: 275.

Watters JK, Estilo MJ, Clark GL and Lorvick J (1994). *Syringe and needle exchange as HIV/AIDS prevention for injecting drug users*. *Journal of American Medical Association*, 271: 115-120.

Wolk J, Wodak A, Guinan JJ, Macaskill P and Simpson JM (1990). *The effect of a needle and syringe exchange on a methadone maintenance unit*. *British Journal of Addiction*, 85. 1445-1450.
